# Supplementary material for: Stereoselective access to furan-fused [5.5.0] bicyclic heterocycles enabled by gold-catalyzed asymmetric [8 + 4] cycloaddition
Source: Royal Society of Chemistry journal article supplement (doi:10.1039/d4qo01841a), 2024-10-29
Supplement: d4qo01841a1.pdf [file d4qo01841a1.pdf]

## SUPPORTING INFORMATION

### **Stereoselective Access to Furan-fused [5.5.0] Bicyclic Heterocycles enabled by Gold-Catalyzed Asymmetric [8+4] Cycloaddition**

Xunhua Wang<sup>[1]</sup>, Jianhua Wang<sup>\*[2]</sup>, and Xiaoxun Li <sup>\*[1,3]</sup>

1. Department of Medicinal Chemistry, Key Laboratory of Chemical Biology (Ministry of Education), NMPA Key Laboratory for Technology Research and Evaluation of Drug Products, School of Pharmaceutical Sciences, Cheeloo College of Medicine, Shandong University, Jinan, Shandong, 250012, China

2. Translational Pharmaceutical Laboratory, Jining First People's Hospital, Shandong First Medical University, Jining, 272000, China

3. Suzhou Research Institute of Shandong University, NO.388 Ruoshui Road, SIP, Suzhou, Jiangsu 215123, China

\*Correspondence to: J. Wang: [jianhua.wang\\_8710@163.com](mailto:jianhua.wang_8710@163.com); X. Li: [xli@sdu.edu.cn](mailto:xli@sdu.edu.cn).

## Table of Contents

|                                                                                      |     |
|--------------------------------------------------------------------------------------|-----|
| 1. General information .....                                                         | 1   |
| 2. Reaction optimizations.....                                                       | 2   |
| 3. Representative procedure and data for the synthesis of <b>3</b> or <b>4</b> ..... | 6   |
| 4. Large-scale reaction and synthetic transformations.....                           | 40  |
| 5. X-ray crystallography data.....                                                   | 45  |
| 6. References.....                                                                   | 54  |
| 7. NMR spectra .....                                                                 | 55  |
| 8. Copies of HPLC spectra.....                                                       | 123 |

## 1. General information

Unless otherwise noted, all the reactions for the preparation of the substrates were performed in oven-dried glassware under nitrogen atmosphere with freshly distilled solvents. The catalytic reactions were performed under nitrogen atmosphere. The solvents were purified by distillation from calcium hydride unless otherwise noted. All other commercial reagents were used without further purification unless otherwise indicated.  $^1\text{H}$  NMR and  $^{13}\text{C}$  NMR spectra were recorded on Bruker 400 MHz spectrometer (ADVANCE III) using chloroform-*d* ( $\text{CDCl}_3$ ) and dimethyl sulphoxide-*d*6 (DMSO- *d*6) as the internal standard. Chemical shifts were reported in parts per million (ppm), and the residual solvent peak was used as an internal reference: proton (chloroform  $\delta$  7.26), carbon (chloroform  $\delta$  77.10) or tetramethylsilane (TMS  $\delta$  0.00) was used as a reference. Data are reported as follows: chemical shift, multiplicity (s = singlet, d = doublet, t = triplet, q = quartet, m = multiplet, br = broad), coupling constants (Hz) and integration. The enantiomeric excesses (e.e.) was determined by HPLC analysis on LC-20AD/T LPGE KIT using Daicel CHIRALPAK® column. X-ray diffraction analyses were carried out on a microcrystalline powder using a Rigaku Oxford Diffraction XtaLAB Synergy-S diffractometer using Cu radiation ( $\lambda = 1.54184 \text{ \AA}$ ). If not specially mentioned, flash column chromatography was performed using 200-300 silica gel purchased from Yantai Chemicals (China). High-resolution mass spectra (HRMS) were recorded on a Bruker Apex IV FTMS mass spectrometer using ESI (electrospray ionization) as ionization method. Optical rotations were recorded on an AUTOPOL II digital polarimeter at 589 nm and are recorded as  $[\alpha]_{\text{D}}^{\text{T}}$  (concentration in grams/100 mL solvent). The racemic 1-(1-alkynyl) cyclopropyl ketones<sup>[1-3]</sup>, substituted tropones<sup>[4]</sup> were prepared according to the reported procedures. The chiral gold catalyst was prepared according to the reported procedures.

## 2. Reaction optimizations

General procedure for the reaction optimization

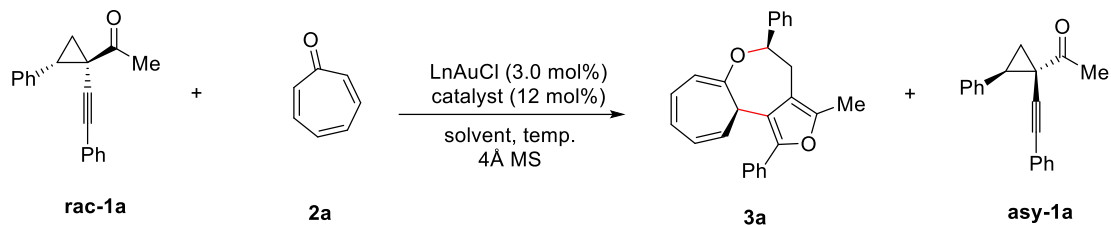

To a dried tube was added  $\text{Ln}(\text{AuCl})_2$  (3.0 mol%) and catalyst (12.0 mol%) in the glove box, and the solvent (0.5 mL) was added. The mixture was stirred at room temperature for 10 min. Then the precipitate was removed and the remaining solution was transferred into a solution of cyclopropyl ketone **1a** (0.1 mmol, 1.0 equiv.) and tropone **2a** (x mmol) with 4 Å molecular sieves 150 mg in solvent (0.5 mL). The reaction was then stirred at the corresponding temperature. After the reaction was complete as monitored by TLC and HPLC analysis, it was filtered through a short pad of silica gel to remove catalyst rapidly. Then the solvent was removed under reduced pressure, and the residue was purified by a silica gel column using ethyl acetate/ petroleum ether (1/60-1/10) as the eluent to give the aim product **3a** and **asy-1a**.

**Table 1. Investigation of chiral ligands**

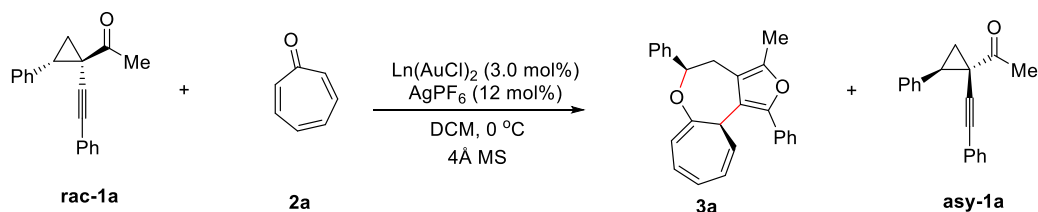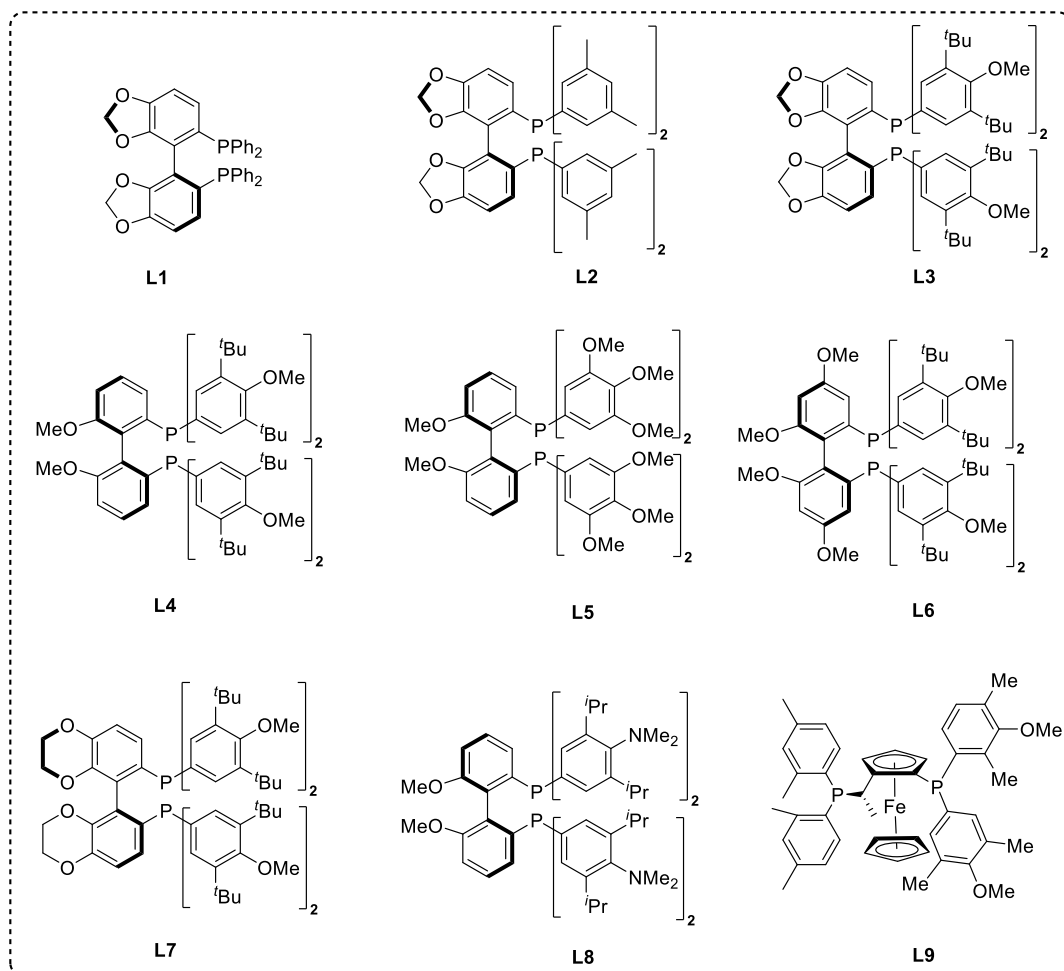

| Entry | ligand    | yield (3a) | ee (3a) | yield (1a) | ee (1a) | <i>s</i> | time |
|-------|-----------|------------|---------|------------|---------|----------|------|
| 1     | <b>L1</b> | 6%         | 73%     | 71%        | 10%     | 7        | 24 h |
| 2     | <b>L2</b> | 10%        | 74%     | 72%        | 21%     | 8        | 24 h |
| 3     | <b>L3</b> | 15%        | 85%     | 65%        | 30%     | 17       | 12 h |
| 4     | <b>L4</b> | 35%        | 73%     | 55%        | 56%     | 11       | 12 h |
| 5     | <b>L5</b> | trace      | --      | 81%        | 2%      | --       | 12 h |
| 6     | <b>L6</b> | 36%        | 76%     | 46%        | 59%     | 13       | 12 h |
| 7     | <b>L7</b> | 28%        | 83%     | 61%        | 38%     | 16       | 12 h |
| 8     | <b>L8</b> | 31%        | 85%     | 38%        | 51%     | 20       | 12 h |
| 9     | <b>L9</b> | 37%        | 71%     | 40%        | 53%     | 10       | 12 h |

<sup>a</sup> Unless otherwise indicated, all reactions were performed with **rac-1a** (0.1 mmol) and **2a** (0.08 mmol) in the presence of Ln(AuCl)<sub>2</sub> (3.0 mol%), AgPF<sub>6</sub> (12.0 mol%) in DCM (1.0 mL) at 0 °C under nitrogen atmosphere. <sup>b</sup> Isolated yield of product **3a**. <sup>c</sup> Determined by HPLC analysis. <sup>d</sup> Selectivity (*s*) values were calculated through the equation  $s = \ln[(1 - C)(1 - ee_{1a})]/\ln[(1 - C)(1 + ee_{1a})]$ , where *C* is the conversion;  $C = ee_{1a}/(ee_{1a} + ee_{3a})$ .

After optimization, **L8** was selected for the following reaction optimization.

**Table 2. Investigation of catalyst**

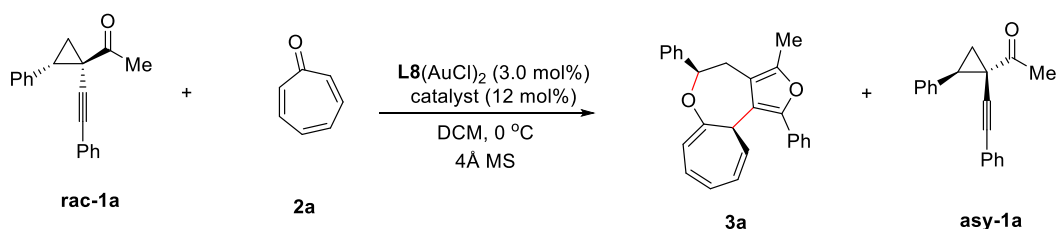

| Entry | catalyst           | yield ( <b>3a</b> ) <sup>b</sup> | ee ( <b>3a</b> ) <sup>c</sup> | yield ( <b>1a</b> ) <sup>b</sup> | ee ( <b>1a</b> ) <sup>c</sup> | time | <i>s</i> |
|-------|--------------------|----------------------------------|-------------------------------|----------------------------------|-------------------------------|------|----------|
| 1     | AgPF <sub>6</sub>  | 39%                              | 85%                           | 38%                              | 51%                           | 24 h | 20       |
| 2     | AgOTf              | 36%                              | 81%                           | 41%                              | 62%                           | 20 h | 18       |
| 3     | AgNTf <sub>2</sub> | 41%                              | 71%                           | 40%                              | 95%                           | 12 h | 21       |
| 4     | AgClO <sub>4</sub> | 26%                              | 78%                           | 49%                              | 65%                           | 20 h | 16       |
| 5     | NaBAR <sup>F</sup> | 40%                              | 81%                           | 38%                              | 96%                           | 12 h | 37       |

<sup>a</sup> Unless otherwise indicated, all reactions were performed with **rac-1a** (0.1 mmol) and **2a** (0.08 mmol) in the presence of **L8**(AuCl)<sub>2</sub> (3.0 mol%), catalyst (12.0 mol%) in DCM (1.0 mL) 0 °C under nitrogen atmosphere. <sup>b</sup> Isolated yield of product **3a**. <sup>c</sup> Determined by HPLC analysis. <sup>d</sup> Selectivity (*s*) values were calculated through the equation  $s = \ln[(1 - C)(1 - ee_{1a})]/\ln[(1 - C)(1 + ee_{1a})]$ , where *C* is the conversion;  $C = ee_{1a}/(ee_{1a} + ee_{3a})$ .

NaBAR<sup>F</sup> = Sodium tetrakis (3,5-bis(trifluoro methyl)phenyl)borate

After optimization, NaBAR<sup>F</sup> was selected for the following reaction optimization.

**Table 3. Investigation of solvents and temperature**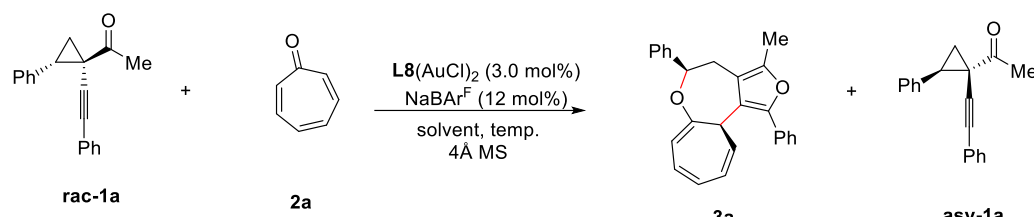

The reaction scheme shows the reaction of **rac-1a** (a cyclopropane derivative with a phenyl group, a methyl ketone group, and a propargyl group) and **2a** (a cyclic enone) in the presence of **L8(AuCl)<sub>2</sub>** (3.0 mol%), **NaBAR<sup>F</sup>** (12 mol%), solvent, temperature, and 4Å MS to produce **3a** (a complex bicyclic product) and **asy-1a** (the starting material **rac-1a**).

| Entry | temp.  | solvent           | yield ( <b>3a</b> ) <sup>b</sup> | ee ( <b>3a</b> ) <sup>c</sup> | yield ( <b>1a</b> ) <sup>b</sup> | ee ( <b>1a</b> ) <sup>c</sup> | time | <i>s</i> |
|-------|--------|-------------------|----------------------------------|-------------------------------|----------------------------------|-------------------------------|------|----------|
| 1     | 0 °C   | DCM               | 40%                              | 81%                           | 38%                              | 96%                           | 12 h | 37       |
| 2     | 0 °C   | DCE               | 31%                              | 77%                           | 35%                              | 90%                           | 12 h | 23       |
| 3     | 0 °C   | CHCl <sub>3</sub> | 29%                              | 80%                           | 52%                              | 75%                           | 12 h | 20       |
| 4     | 0 °C   | PhF               | 21%                              | 80%                           | 53%                              | 65%                           | 12 h | 18       |
| 5     | 0 °C   | PhCl              | 38%                              | 76%                           | 36%                              | 87%                           | 12 h | 20       |
| 6     | 0 °C   | PhCF <sub>3</sub> | 48%                              | 65%                           | 31%                              | 99%                           | 12 h | 23       |
| 7     | -10 °C | DCM               | 41%                              | 83%                           | 43%                              | 94%                           | 24 h | 38       |
| 8     | -20 °C | DCM               | 40%                              | 89%                           | 42%                              | 89%                           | 24 h | 51       |
| 9     | -30 °C | DCM               | 19%                              | 91%                           | 65%                              | 38%                           | 48 h | 31       |

<sup>a</sup> Unless otherwise indicated, all reactions were performed with **rac-1a** (0.1 mmol) and **2a** (0.08 mmol) in the presence of **L8(AuCl)<sub>2</sub>** (3.0 mol%), **NaBAR<sup>F</sup>** (12.0 mol%) in solvent (1.0 mL) under nitrogen atmosphere. <sup>b</sup> Isolated yield of product **3a**. <sup>c</sup> Determined by HPLC analysis. <sup>d</sup> Selectivity (*s*) values were calculated through the equation  $s = \ln[(1 - C)(1 - ee_{1a})] / \ln[(1 - C)(1 + ee_{1a})]$ , where *C* is the conversion;  $C = ee_{1a} / (ee_{1a} + ee_{3a})$ .

After optimization, -20 °C was selected as the optimal reaction temperature.

### 3. Representative procedure and data for the synthesis of compound 3 or compound 4

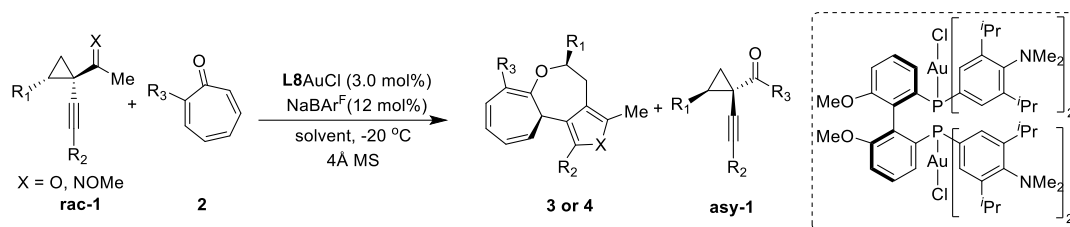

To a dried flask was added **L8AuCl** (3.0 mol%) and  $\text{NaBAR}^{\text{F}}$  (12 mol%) in the glove box, and the solvent (1.0 mL) was added. Then the mixture was stirred at room temperature for 10 min. Then the solution was transferred into a solution of cyclopropyl ketone **1** (0.2 mmol, 1.0 equiv.) and tropone **2** (0.16 mmol, 0.8 equiv.) with 4 Å molecular sieves 300 mg in solvent (1.0 mL) at  $-20\text{ }^{\circ}\text{C}$ . The reaction was then stirred at  $-20\text{ }^{\circ}\text{C}$  for 12-72 h. After the reaction was monitored by TLC and HPLC analysis. The reaction was filtered by silica gel to remove catalyst rapidly. Then the solvent was removed under reduced pressure, and the residue was purified by a silica gel column using ethyl acetate/ petroleum ether (1/60-1/10) as the eluent to give the aim product, either compound **3** or compound **4**.

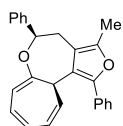

#### (5*R*,11*R*)-3-methyl-1,5-diphenyl-4,5-dihydro-11aH-cyclohepta[b]furo[3,4-d]oxepine (**3a**)

White solid, 29 mg, m.p. =  $80\text{-}82\text{ }^{\circ}\text{C}$ ; 67 mg, 40% yield; 89% ee;  $[\alpha]_{\text{D}}^{20.0} = -1.4$  (0.1,  $\text{CH}_2\text{Cl}_2$ ); [Daicel Chiralpak IA-3 (0.45 cm  $\times$  25 cm), *n*-hexane/2-propanol = 97/3,  $v = 1.0\text{ mL}\cdot\text{min}^{-1}$ ,  $\lambda = 254\text{ nm}$ ,  $t$  (major) = 5.6 min,  $t$  (minor) = 7.2 min];  $^1\text{H NMR}$  (400 MHz,  $\text{CDCl}_3$ )  $\delta$  2.24 (s, 3H), 3.01 (dd,  $J = 15.2, 4.3\text{ Hz}$ , 1H), 3.15 (dd,  $J = 15.2, 9.5\text{ Hz}$ , 1H), 3.28 (d,  $J = 6.0\text{ Hz}$ , 1H), 5.11 (dd,  $J = 9.5, 4.3\text{ Hz}$ , 1H), 5.30 (dd,  $J = 9.1, 6.0\text{ Hz}$ , 1H), 5.74 (d,  $J = 6.3\text{ Hz}$ , 1H), 6.31 (dd,  $J = 9.2, 5.5\text{ Hz}$ , 1H), 6.44 (dd,  $J = 10.9, 6.4\text{ Hz}$ , 1H), 6.61 (dd,  $J = 10.9, 5.5\text{ Hz}$ , 1H), 7.23 (d,  $J = 7.4\text{ Hz}$ , 1H), 7.29-7.37 (m, 7H), 7.41-7.47 (m, 2H);  $^{13}\text{C NMR}$  (100 MHz,  $\text{CDCl}_3$ )  $\delta$  11.5, 30.2, 40.1, 82.6, 113.2, 117.8, 120.9,



124.1, 125.9, 126.3, 126.8, 127.0, 127.8, 128.1, 128.3, 128.4, 128.7, 131.5, 140.6, 144.7, 146.4, 147.5; HRMS (ESI)  $m/z$  calcd for  $C_{26}H_{22}O_2$   $[M+H]^+$ : 367.1693, found: 367.1691.

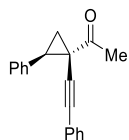

### 1-((1*S*,2*R*)-2-phenyl-1-(phenylethynyl)cyclopropyl)ethan-1-one (1a)

Yellow oil, 22 mg, 42% yield; 89% ee;  $[\alpha]_D^{20.0} = 72.1$  (0.1,  $CH_2Cl_2$ ); [Daicel Chiralpak IB-3 (0.45 cm  $\times$  25 cm), *n*-hexane/2-propanol = 97/3,  $v = 1.0$  mL $\cdot$ min $^{-1}$ ,  $\lambda = 254$  nm,  $t$  (major) = 5.2 min,  $t$  (minor) = 5.7 min];  $^1H$  NMR (400 MHz,  $CDCl_3$ )  $\delta$  1.77 (dd,  $J = 8.0, 4.2$  Hz, 1H), 2.12 (dd,  $J = 9.1, 4.3$  Hz, 1H), 2.51 (s, 3H), 2.96 (t,  $J = 8.5$  Hz, 1H), 7.04 (dd,  $J = 7.6, 2.0$  Hz, 2H), 7.14 (d,  $J = 6.8$  Hz, 3H), 7.18-7.23 (m, 3H), 7.24-7.30 (m, 2H);  $^{13}C$  NMR (100 MHz,  $CDCl_3$ )  $\delta$  26.5, 29.7, 33.4, 39.2, 84.5, 87.4, 123.0, 127.3, 128.0, 128.1, 128.2, 128.8, 131.4, 136.0, 204.9.

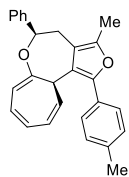

### (5*R*,11*R*)-3-methyl-5-phenyl-1-(*p*-tolyl)-4,5-dihydro-11aH-cyclohepta[b]furo[3,4-d]oxepine (3b)

White solid, m.p. = 98-100 °C; 32 mg, 42% yield; 92% ee;  $[\alpha]_D^{20.0} = -5.3$  (0.1,  $CH_2Cl_2$ ); [Daicel Chiralpak IB-3 (0.45 cm  $\times$  25 cm), *n*-hexane/2-propanol = 97/3,  $v = 1.0$  mL $\cdot$ min $^{-1}$ ,  $\lambda = 254$  nm,  $t$  (major) = 5.1 min,  $t$  (minor) = 5.7 min];  $^1H$  NMR (400 MHz,  $CDCl_3$ )  $\delta$  2.16 (s, 3H), 2.27 (s, 3H), 2.94 (dd,  $J = 15.2, 4.3$  Hz, 1H), 3.07 (dd,  $J = 15.2, 9.4$  Hz, 1H), 3.17 (d,  $J = 6.0$  Hz, 1H), 5.05 (dd,  $J = 9.4, 4.2$  Hz, 1H), 5.23 (dd,  $J = 9.1, 6.1$  Hz, 1H), 5.67 (d,  $J = 6.3$  Hz, 1H), 6.23 (dd,  $J = 9.2, 5.5$  Hz, 1H), 6.37 (dd,  $J = 10.9, 6.4$  Hz, 1H), 6.53 (dd,  $J = 10.9, 5.5$  Hz, 1H), 7.07 (d,  $J = 7.9$  Hz, 2H), 7.23-7.28 (m, 7H);  $^{13}C$  NMR (100 MHz,  $CDCl_3$ )  $\delta$  11.5, 21.3, 30.4, 40.2, 82.7, 113.0, 117.7, 120.2, 124.2, 125.8, 126.2, 126.8, 127.8, 128.1, 128.3, 128.6, 128.7, 129.1, 136.8, 140.7, 144.8, 146.1, 147.7; HRMS (ESI)  $m/z$  calcd for  $C_{27}H_{24}O_2$   $[M+H]^+$ : 381.1849, found: 381.1845.

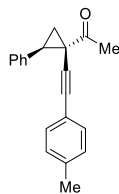

**1-((1*S*,2*R*)-2-phenyl-1-(*p*-tolylethynyl)cyclopropyl)ethan-1-one (1b)**

Yellow oil, 22 mg, 40% yield; 94% ee;  $[\alpha]_D^{20.0} = 58.9$  (0.1, CH<sub>2</sub>Cl<sub>2</sub>); [Daicel Chiralpak IB-3 (0.45 cm × 25 cm), *n*-hexane/2-propanol = 99/1,  $v = 1.0 \text{ mL} \cdot \text{min}^{-1}$ ,  $\lambda = 254 \text{ nm}$ ,  $t$  (major) = 4.9 min,  $t$  (minor) = 5.4 min]; <sup>1</sup>H NMR (400 MHz, CDCl<sub>3</sub>)  $\delta$  1.75 (dd,  $J = 8.0, 4.2 \text{ Hz}$ , 1H), 2.11 (dd,  $J = 9.1, 4.2 \text{ Hz}$ , 1H), 2.32 (s, 3H), 2.50 (s, 3H), 2.95 (t,  $J = 8.5 \text{ Hz}$ , 1H), 6.93-6.95 (m, 4H), 7.17-7.22 (m, 3H), 7.22-7.29 (m, 2H); <sup>13</sup>C NMR (100 MHz, CDCl<sub>3</sub>)  $\delta$  21.5, 26.5, 29.7, 33.4, 39.2, 84.6, 86.6, 120.0, 127.3, 128.0, 128.8, 129.0, 131.3, 136.0, 138.2, 205.1.

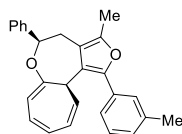

**(5*R*,11*R*)-3-methyl-5-phenyl-1-(*m*-tolyl)-4,5-dihydro-11aH-cyclohepta[b]furo[3,4-d]oxepine (3c)**

White solid, m.p. = 80-82 °C; 31 mg, 40% yield; 88% ee;  $[\alpha]_D^{20.0} = -2.6$  (0.1, CH<sub>2</sub>Cl<sub>2</sub>); [Daicel Chiralpak IA-3 (0.45 cm × 25 cm), *n*-hexane/2-propanol = 97/3,  $v = 1.0 \text{ mL} \cdot \text{min}^{-1}$ ,  $\lambda = 254 \text{ nm}$ ,  $t$  (major) = 4.9 min,  $t$  (minor) = 5.4 min]; <sup>1</sup>H NMR (400 MHz, CDCl<sub>3</sub>)  $\delta$  2.14 (s, 3H), 2.25 (s, 3H), 2.94 (dd,  $J = 15.1, 6.0 \text{ Hz}$ , 1H), 3.06 (dd,  $J = 15.1, 9.4 \text{ Hz}$ , 1H), 3.15 (d,  $J = 6.0 \text{ Hz}$ , 1H), 5.04 (dd,  $J = 9.1, 3.7 \text{ Hz}$ , 1H), 5.16-5.22 (m, 1H), 5.68 (d,  $J = 6.3 \text{ Hz}$ , 1H), 6.23 (dd,  $J = 8.4, 6.0 \text{ Hz}$ , 1H), 6.38 (dd,  $J = 10.8, 6.4 \text{ Hz}$ , 1H), 6.53 (dd,  $J = 10.8, 5.4 \text{ Hz}$ , 1H), 6.96 (d,  $J = 5.1 \text{ Hz}$ , 1H), 7.09-7.16 (m, 2H), 7.18-7.24 (m, 6H); <sup>13</sup>C NMR (100 MHz, CDCl<sub>3</sub>)  $\delta$  11.5, 21.6, 30.6, 40.2, 82.7, 112.8, 117.8, 120.7, 123.4, 124.1, 125.7, 126.7, 126.9, 127.6, 127.8, 128.1, 128.3, 128.4, 128.7, 131.3, 137.9, 140.8, 144.8, 146.3, 147.7; HRMS (ESI)  $m/z$  calcd for C<sub>27</sub>H<sub>24</sub>O<sub>2</sub> [M+H]<sup>+</sup>: 381.1849, found: 381.1846.

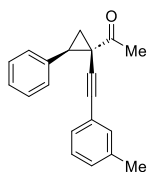

**1-((1*S*,2*R*)-2-phenyl-1-(*m*-tolylethynyl)cyclopropyl)ethan-1-one (1c)**

Yellow oil, 24 mg, 43% yield; 97% ee;  $[\alpha]_{\text{D}}^{20.0} = 99.7$  (0.1,  $\text{CH}_2\text{Cl}_2$ ); [Daicel Chiralpak IB-3 (0.45 cm  $\times$  25 cm), *n*-hexane/2-propanol = 97/3,  $v = 1.0 \text{ mL} \cdot \text{min}^{-1}$ ,  $\lambda = 254 \text{ nm}$ ,  $t$  (major) = 5.1 min,  $t$  (minor) = 5.5 min];  $^1\text{H NMR}$  (400 MHz,  $\text{CDCl}_3$ )  $\delta$  1.83 (dd,  $J = 8.0, 4.2 \text{ Hz}$ , 1H), 2.19 (dd,  $J = 8.0, 4.2 \text{ Hz}$ , 1H), 2.26 (s, 3H), 2.58 (s, 3H), 3.03 (t,  $J = 8.5 \text{ Hz}$ , 1H), 6.89-6.97 (m, 2H), 7.05 (d,  $J = 7.7 \text{ Hz}$ , 1H), 7.10 (t,  $J = 7.5 \text{ Hz}$ , 1H), 7.26-7.36 (m, 3H), 7.31-7.37 (m, 2H);  $^{13}\text{C NMR}$  (100 MHz,  $\text{CDCl}_3$ )  $\delta$  21.2, 26.5, 29.7, 33.4, 39.2, 84.6, 87.0, 122.8, 127.3, 128.0, 128.1, 128.4, 128.8, 128.9, 132.0, 136.0, 137.9, 205.0.

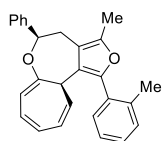

**(5*R*,11*R*)-3-methyl-5-phenyl-1-(*o*-tolyl)-4,5-dihydro-11aH-cyclohepta[b]furo[3,4-d]oxepine (3d)**

White solid, m.p. = 84-86 °C; 28 mg, 37% yield; 90% ee;  $[\alpha]_{\text{D}}^{20.0} = -0.8$  (0.1,  $\text{CH}_2\text{Cl}_2$ ); [Daicel Chiralpak IB-3 (0.45 cm  $\times$  25 cm), *n*-hexane/THF = 99/1,  $v = 1.0 \text{ mL} \cdot \text{min}^{-1}$ ,  $\lambda = 254 \text{ nm}$ ,  $t$  (major) = 6.0 min,  $t$  (minor) = 5.8 min];  $^1\text{H NMR}$  (400 MHz,  $\text{CDCl}_3$ )  $\delta$  1.93 (s, 3H), 2.23 (s, 3H), 2.86 (dd,  $J = 14.9, 6.6 \text{ Hz}$ , 1H), 2.95 (d,  $J = 6.0 \text{ Hz}$ , 1H), 3.09 (dd,  $J = 14.9, 5.2 \text{ Hz}$ , 1H), 5.06-5.18 (m, 2H), 5.76 (d,  $J = 6.2 \text{ Hz}$ , 1H), 6.00 (dd,  $J = 9.3, 5.4 \text{ Hz}$ , 1H), 6.33 (dd,  $J = 10.9, 6.1 \text{ Hz}$ , 1H), 6.45 (dd,  $J = 10.9, 5.4 \text{ Hz}$ , 1H), 7.10 (d,  $J = 7.6 \text{ Hz}$ , 1H), 7.14-7.18 (m, 3H), 7.18-7.25 (m, 5H);  $^{13}\text{C NMR}$  (100 MHz,  $\text{CDCl}_3$ )  $\delta$  11.2, 20.5, 29.8, 40.4, 83.2, 113.4, 115.8, 120.9, 123.7, 125.2, 125.4, 126.6, 127.9, 128.0, 128.1, 128.3, 128.4, 130.3, 130.6, 131.3, 137.9, 140.8, 145.5, 146.5, 147.5; HRMS (ESI)  $m/z$  calcd for  $\text{C}_{27}\text{H}_{24}\text{O}_2$   $[\text{M}+\text{H}]^+$ : 381.1849, found: 381.1849.

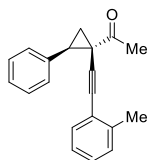

**1-((1*S*,2*R*)-2-phenyl-1-(*o*-tolylethynyl)cyclopropyl)ethan-1-one (1d)**

Yellow oil, 21.3 mg, 39% yield; 95% ee;  $[\alpha]_{\text{D}}^{20.0} = 73.8$  (0.1, CH<sub>2</sub>Cl<sub>2</sub>); [Daicel Chiralpak IB-3 (0.45 cm × 25 cm), *n*-hexane/2-propanol = 99/1,  $v = 1.0 \text{ mL} \cdot \text{min}^{-1}$ ,  $\lambda = 254 \text{ nm}$ , t (major) = 6.4 min, t (minor) = 7.7 min]; <sup>1</sup>H NMR (400 MHz, CDCl<sub>3</sub>)  $\delta$  1.86 (dd,  $J = 8.0, 4.2 \text{ Hz}$ , 1H), 2.09 (s, 3H), 2.19 (dd,  $J = 9.1, 4.2 \text{ Hz}$ , 1H), 2.61 (s, 3H), 3.07 (t,  $J = 8.5 \text{ Hz}$ , 1H), 7.03 (t,  $J = 7.5 \text{ Hz}$ , 1H), 7.04-7.16 (m, 3H), 7.24-7.35 (m, 5H); <sup>13</sup>C NMR (100 MHz, CDCl<sub>3</sub>)  $\delta$  20.5, 26.5, 29.8, 33.5, 39.1, 83.4, 91.1, 122.8, 125.5, 127.3, 128.0, 128.1, 128.9, 129.3, 131.9, 136.0, 140.0, 205.0.

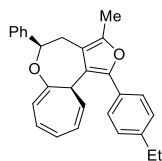

**(5*R*,11*aR*)-1-(4-ethylphenyl)-3-methyl-5-phenyl-4,5-dihydro-11*aH*-cyclohepta[b]furo[3,4-*d*]oxepine (3e)**

White solid, m.p. = 100-102 °C; 28 mg, 36% yield; 91% ee;  $[\alpha]_{\text{D}}^{20.0} = -0.9$  (0.1, CH<sub>2</sub>Cl<sub>2</sub>); [Daicel Chiralpak IC-3 (0.45 cm × 25 cm), *n*-hexane/2-propanol = 97/3,  $v = 1.0 \text{ mL} \cdot \text{min}^{-1}$ ,  $\lambda = 254 \text{ nm}$ , t (major) = 4.4 min, t (minor) = 5.7 min]; <sup>1</sup>H NMR (400 MHz, CDCl<sub>3</sub>)  $\delta$  1.25 (t,  $J = 7.5 \text{ Hz}$ , 3H), 2.25 (s, 3H), 2.65 (q,  $J = 7.5 \text{ Hz}$ , 2H), 3.02 (dd,  $J = 15.1, 4.2 \text{ Hz}$ , 1H), 3.16 (dd,  $J = 15.1, 9.6 \text{ Hz}$ , 1H), 3.28 (d,  $J = 6.1 \text{ Hz}$ , 1H), 5.13 (dd,  $J = 9.5, 4.2 \text{ Hz}$ , 1H), 5.33 (dd,  $J = 9.1, 6.0 \text{ Hz}$ , 1H), 5.75 (d,  $J = 6.4 \text{ Hz}$ , 1H), 6.33 (dd,  $J = 9.1, 5.6 \text{ Hz}$ , 1H), 6.46 (dd,  $J = 10.9, 6.3 \text{ Hz}$ , 1H), 6.62 (dd,  $J = 10.8, 5.4 \text{ Hz}$ , 1H), 7.19 (d,  $J = 7.8 \text{ Hz}$ , 2H) 7.29-7.45 (m, 7H); <sup>13</sup>C NMR (100 MHz, CDCl<sub>3</sub>)  $\delta$  11.5, 15.5, 28.7, 30.3, 40.1, 82.6, 113.0, 117.7, 120.2, 124.2, 125.8, 126.2, 126.8, 127.7, 127.9, 128.1, 128.3, 128.7, 128.9, 140.7, 143.1, 144.8, 146.0, 147.7; HRMS (ESI)  $m/z$  calcd for C<sub>28</sub>H<sub>26</sub>O<sub>2</sub> [M+H]<sup>+</sup>: 395.2006, found: 395.2003.

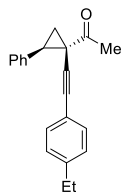

**1-((1*S*,2*R*)-1-((4-ethylphenyl)ethynyl)-2-phenylcyclopropyl)ethan-1-one (1e)**

Yellow oil, 24 mg, 42% yield; 93% ee;  $[\alpha]_{\text{D}}^{20.0} = 63.9$  (0.1,  $\text{CH}_2\text{Cl}_2$ ); [Daicel Chiralpak IB-3 (0.45 cm  $\times$  25 cm), *n*-hexane/2-propanol = 97/3,  $v = 1.0 \text{ mL} \cdot \text{min}^{-1}$ ,  $\lambda = 254 \text{ nm}$ ,  $t$  (major) = 4.7 min,  $t$  (minor) = 5.3 min];  $^1\text{H NMR}$  (400 MHz,  $\text{CDCl}_3$ )  $\delta$  1.20 (t,  $J = 7.6$  Hz, 3H), 1.85 (dd,  $J = 7.9, 4.2$  Hz, 1H), 2.20 (dd,  $J = 9.1, 4.2$  Hz, 1H), 2.60 (s, 3H), 2.61 (q,  $J = 7.6$  Hz, 2H), 3.04 (t,  $J = 8.5$  Hz, 1H), 7.06-7.08 (m, 4H), 7.26-7.38 (m, 5H);  $^{13}\text{C NMR}$  (100 MHz,  $\text{CDCl}_3$ )  $\delta$  15.4, 26.5, 28.8, 29.7, 33.4, 39.2, 84.6, 86.6, 120.2, 127.2, 127.8, 128.0, 128.7, 131.4, 136.0, 144.5, 205.1.

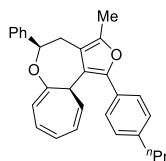

**(5*R*,11*R*)-3-methyl-5-phenyl-1-(4-propylphenyl)-4,5-dihydro-11aH-cyclohepta[b]furo[3,4-d] oxepine (3f)**

White solid, m.p. = 84-86 °C; 33 mg, 40% yield; 85% ee;  $[\alpha]_{\text{D}}^{20.0} = -0.5$  (0.1,  $\text{CH}_2\text{Cl}_2$ ); [Daicel Chiralpak IC-3 (0.45 cm  $\times$  25 cm), *n*-hexane/2-propanol = 97/3,  $v = 1.0 \text{ mL} \cdot \text{min}^{-1}$ ,  $\lambda = 254 \text{ nm}$ ,  $t$  (major) = 4.3 min,  $t$  (minor) = 5.4 min];  $^1\text{H NMR}$  (400 MHz,  $\text{CDCl}_3$ )  $\delta$  0.92 (t,  $J = 7.3$  Hz, 3H), 1.60-1.67 (m, 2H), 2.23 (s, 3H), 2.56 (t,  $J = 7.6$  Hz, 2H), 2.99 (dd,  $J = 15.2, 4.2$  Hz, 1H), 3.14 (dd,  $J = 15.2, 9.5$  Hz, 1H), 3.26 (d,  $J = 6.1$  Hz, 1H), 5.11 (dd,  $J = 9.5, 4.2$  Hz, 1H), 5.30 (dd,  $J = 9.2, 6.0$  Hz, 1H), 5.73 (d,  $J = 6.3$  Hz, 1H), 6.30 (dd,  $J = 9.2, 5.5$  Hz, 1H), 6.44 (dd,  $J = 10.9, 6.4$  Hz, 1H), 6.60 (dd,  $J = 10.9, 5.5$  Hz, 1H), 7.14 (d,  $J = 8.2$  Hz, 2H), 7.30-7.38 (m, 7H);  $^{13}\text{C NMR}$  (100 MHz,  $\text{CDCl}_3$ )  $\delta$  11.5, 13.9, 24.5, 30.3, 37.9, 40.1, 82.6, 113.0, 117.7, 120.2, 124.2, 125.8,

126.1, 126.8, 127.7, 128.1, 128.3, 128.5, 128.7, 128.9, 140.7, 141.6, 144.8, 146.0, 147.7;  
HRMS (ESI)  $m/z$  calcd for  $C_{29}H_{28}O_2$   $[M+H]^+$ : 409.2162, found: 409.2162.

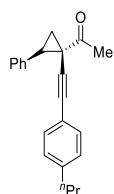

**1-((1*S*,2*S*)-2-phenyl-1-((4-propylphenyl)ethynyl)cyclopropyl)ethan-1-one (1f)**

Yellow oil, 23 mg, 38% yield; 88% ee;  $[\alpha]_D^{20.0}=87.1$  (0.1,  $CH_2Cl_2$ ); [Daicel Chiralpak IB-3 (0.45 cm  $\times$  25 cm), *n*-hexane/2-propanol = 97/3,  $v = 1.0$  mL $\cdot$ min $^{-1}$ ,  $\lambda = 254$  nm, t (major) = 4.6 min, t (minor) = 5.2 min];  $^1H$  NMR (400 MHz,  $CDCl_3$ )  $\delta$  0.82 (t,  $J = 7.3$  Hz, 3H), 1.50 (p,  $J = 7.5$  Hz, 2H), 1.75 (dd,  $J = 8.0, 4.2$  Hz, 1H), 2.11 (dd,  $J = 9.2, 4.2$  Hz, 1H), 2.44 (d,  $J = 7.8$  Hz, 2H), 2.50 (s, 3H), 2.95 (t,  $J = 8.5$  Hz, 1H), 6.90-6.99 (m, 4H), 7.14-7.28 (m, 5H);  $^{13}C$  NMR (100 MHz,  $CDCl_3$ )  $\delta$  13.8, 24.4, 26.5, 29.7, 33.4, 38.0, 39.2, 84.6, 86.6, 120.2, 127.3, 128.0, 128.4, 128.8, 131.3, 136.0, 143.0, 205.1.

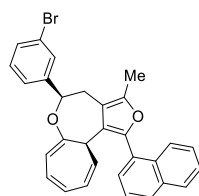

**(5*R*,11*R*)-5-(3-bromophenyl)-3-methyl-1-(naphthalen-1-yl)-4,5-dihydro-11aH-cyclohepta[b]furo[3,4-d]oxepine (3g)**

White solid, m.p. = 110-112  $^{\circ}C$ ; 40 mg, 40% yield; 82% ee;  $[\alpha]_D^{20.0}=-4.4$  (0.1,  $CH_2Cl_2$ ); [Daicel Chiralpak IA-3 (0.45 cm  $\times$  25 cm), *n*-hexane/2-propanol = 97/3,  $v = 1.0$  mL $\cdot$ min $^{-1}$ ,  $\lambda = 254$  nm, t (major) = 6.0 min, t (minor) = 5.4 min];  $^1H$  NMR (400 MHz,  $CDCl_3$ )  $\delta$  2.07 (s, 3H), 2.92 (dd,  $J = 15.0, 6.1$  Hz, 1H), 3.09 (d,  $J = 6.0$  Hz, 1H), 3.28 (dd,  $J = 15.1, 5.1$  Hz, 1H), 5.10 (dd,  $J = 9.2, 6.1$  Hz, 1H), 5.25 (t,  $J = 5.6$  Hz, 1H), 5.87 (d,  $J = 6.1$  Hz, 1H), 5.97 (dd,  $J = 9.2, 5.5$  Hz, 1H), 6.41 (dd,  $J = 11.0, 6.1$  Hz, 1H), 6.50 (dd,  $J = 10.9, 5.4$  Hz, 1H), 7.19-7.27 (m, 2H), 7.42-7.46 (m, 3H), 7.46-7.48 (m, 1H),

7.48-7.52 (m, 2H), 7.90-7.84 (m, 2H), 7.98-8.09 (m, 1H);  $^{13}\text{C}$  NMR (100 MHz,  $\text{CDCl}_3$ )  $\delta$  11.4, 29.9, 40.5, 82.3, 113.4, 115.7, 121.9, 122.3, 123.6, 125.0, 125.1, 125.2, 126.1, 126.4, 126.5, 127.7, 128.2, 128.6, 128.7, 129.0, 129.1, 129.7, 129.9, 131.0, 132.4, 133.8, 143.1, 144.9, 146.9, 147.4; HRMS (ESI)  $m/z$  calcd for  $\text{C}_{30}\text{H}_{23}\text{BrO}_2$   $[\text{M}+\text{H}]^+$ : 495.0954, found: 495.0955.

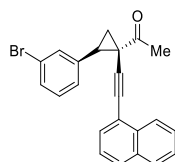

**1-((1*S*,2*R*)-2-(3-bromophenyl)-1-(naphthalen-1-ylethynyl)cyclopropyl)ethan-1-one (1g)**

Yellow oil, 29 mg, 37% yield; 93% ee;  $[\alpha]_{\text{D}}^{20.0}=42.4$  (0.1,  $\text{CH}_2\text{Cl}_2$ ); [Daicel Chiralpak IB-3 (0.45 cm  $\times$  25 cm), *n*-hexane/2-propanol = 97/3,  $v = 1.0 \text{ mL}\cdot\text{min}^{-1}$ ,  $\lambda = 254 \text{ nm}$ ,  $t$  (major) = 7.6 min,  $t$  (minor) = 11.2 min];  $^1\text{H}$  NMR (400 MHz,  $\text{CDCl}_3$ )  $\delta$  1.85 (dd,  $J = 8.0, 4.4 \text{ Hz}$ , 1H), 2.16 (dd,  $J = 9.1, 4.4 \text{ Hz}$ , 1H), 2.61 (s, 3H), 3.04 (d,  $J = 8.4 \text{ Hz}$ , 1H), 7.14 (t,  $J = 7.8 \text{ Hz}$ , 1H), 7.20 (t,  $J = 8.1 \text{ Hz}$ , 1H), 7.28 (t,  $J = 7.7 \text{ Hz}$ , 1H), 7.32-7.41 (m, 4H), 7.43-7.53 (m, 2H), 7.70 (t,  $J = 8.4 \text{ Hz}$ , 2H);  $^{13}\text{C}$  NMR (100 MHz,  $\text{CDCl}_3$ )  $\delta$  26.4, 29.8, 33.5, 38.1, 83.0, 91.5, 120.4, 122.4, 125.2, 125.8, 126.4, 126.9, 127.9, 128.2, 128.7, 129.9, 130.5, 130.6, 132.0, 133.1, 133.2, 138.6, 204.5.

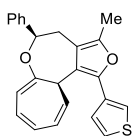

**(5*R*,11*R*)-3-methyl-5-phenyl-1-(thiophen-3-yl)-4,5-dihydro-11aH-cyclohepta[b]furo[3,4-d]oxepine (3h)**

White solid, m.p. = 104-106  $^{\circ}\text{C}$ ; 31 mg, 42% yield; 80% ee;  $[\alpha]_{\text{D}}^{20.0}=-1.9$  (0.1,  $\text{CH}_2\text{Cl}_2$ ); [Daicel Chiralpak IA-3 (0.45 cm  $\times$  25 cm), *n*-hexane/2-propanol = 97/3,  $v = 1.0 \text{ mL}\cdot\text{min}^{-1}$ ,  $\lambda = 254 \text{ nm}$ ,  $t$  (major) = 5.8 min,  $t$  (minor) = 7.6 min];  $^1\text{H}$  NMR (400 MHz,  $\text{CDCl}_3$ )  $\delta$  2.17 (s, 3H), 2.91 (dd,  $J = 15.4, 3.2 \text{ Hz}$ , 1H), 2.98 (d,  $J = 6.4 \text{ Hz}$ , 1H), 3.09

(dd,  $J = 15.5, 9.8$  Hz, 1H), 5.07 (dd,  $J = 9.8, 3.1$  Hz, 1H), 5.19 (dd,  $J = 8.9, 6.5$  Hz, 1H), 5.75 (d,  $J = 6.3$  Hz, 1H), 6.27 (dd,  $J = 9.0, 5.5$  Hz, 1H), 6.45 (dd,  $J = 10.9, 6.3$  Hz, 1H), 6.57 (dd,  $J = 10.9, 5.5$  Hz, 1H), 7.05-7.09 (m, 1H), 7.14-7.18 (m, 1H), 7.17-7.22 (m, 1H), 7.23-7.26 (m, 1H), 7.26-7.32 (m, 4H);  $^{13}\text{C}$  NMR (100 MHz,  $\text{CDCl}_3$ )  $\delta$  11.6, 32.3, 40.6, 83.4, 111.6, 117.8, 119.8, 120.0, 124.1, 125.4, 125.5, 125.9, 126.5, 127.2, 128.1, 128.4, 129.0, 132.2, 141.1, 144.8, 145.0, 145.6; HRMS (ESI)  $m/z$  calcd for  $\text{C}_{24}\text{H}_{20}\text{O}_2\text{S}$   $[\text{M}+\text{H}]^+$ : 373.1257, found: 373.1260.

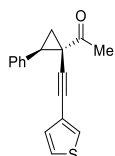

### 1-((1*S*,2*R*)-2-phenyl-1-(thiophen-3-ylethynyl)cyclopropyl)ethan-1-one (**1h**)

Yellow oil, 22 mg, 41% yield; 86% ee;  $[\alpha]_{\text{D}}^{20.0} = 25.8$  (0.1,  $\text{CH}_2\text{Cl}_2$ ); [Daicel Chiralpak IB-3 (0.45 cm  $\times$  25 cm),  $n$ -hexane/2-propanol = 99/1,  $v = 1.0$  mL $\cdot$ min $^{-1}$ ,  $\lambda = 254$  nm,  $t$  (major) = 7.7 min,  $t$  (minor) = 8.6 min];  $^1\text{H}$  NMR (400 MHz,  $\text{CDCl}_3$ )  $\delta$  1.83 (dd,  $J = 8.0, 4.2$  Hz, 1H), 2.19 (dd,  $J = 9.1, 4.2$  Hz, 1H), 2.56 (s, 3H), 3.02 (t,  $J = 8.5$  Hz, 1H), 6.81 (dd,  $J = 4.9, 1.2$  Hz, 1H), 7.13 (dd,  $J = 3.0, 1.2$  Hz, 1H), 7.17 (dd,  $J = 4.9, 3.0$  Hz, 1H), 7.24-7.31 (m, 3H), 7.31-7.39 (m, 2H);  $^{13}\text{C}$  NMR (100 MHz,  $\text{CDCl}_3$ )  $\delta$  26.5, 29.7, 33.4, 39.2, 79.5, 86.9, 122.0, 125.2, 127.3, 128.0, 128.3, 128.8, 129.7, 136.0, 204.9.

### (5*R*,11*R*)-5-(4-fluorophenyl)-3-methyl-1-phenyl-4,5-dihydro-11aH-cyclohepta[b]furo[3,4-d]oxepine (**3i**)

White solid, m.p. = 86-88  $^\circ\text{C}$ ; 30 mg, 39% yield; 85% ee;  $[\alpha]_{\text{D}}^{20.0} = -1.9$  (0.1,  $\text{CH}_2\text{Cl}_2$ ); [Daicel Chiralpak IC-3 (0.45 cm  $\times$  25 cm),  $n$ -hexane/2-propanol = 97/3,  $v = 1.0$  mL $\cdot$ min $^{-1}$ ,  $\lambda = 254$  nm,  $t$  (major) = 4.3 min,  $t$  (minor) = 5.3 min];  $^1\text{H}$  NMR (400 MHz,  $\text{CDCl}_3$ )  $\delta$  2.23 (s, 3H), 3.00 (dd,  $J = 15.1, 4.6$  Hz, 1H), 3.09 (dd,  $J = 15.2, 9.2$  Hz, 1H), 3.29 (d,  $J = 6.0$  Hz, 1H), 5.10 (dd,  $J = 9.2, 4.6$  Hz, 1H), 5.30 (dd,  $J = 9.2, 5.9$  Hz, 1H), 5.71 (d,  $J = 6.4$  Hz, 1H), 6.30 (dd,  $J = 9.3, 5.5$  Hz, 1H), 6.44 (dd,  $J = 10.9, 6.4$  Hz, 1H), 6.61 (dd,  $J = 10.9, 5.5$  Hz, 1H), 7.01 (t,  $J = 8.7$  Hz, 2H), 7.20-7.25 (m, 1H), 7.26-7.36



(m, 4H), 7.44 (d,  $J = 7.2$  Hz, 2H);  $^{13}\text{C}$  NMR (100 MHz,  $\text{CDCl}_3$ )  $\delta$  11.5, 29.9, 40.0, 81.7, 113.5, 115.1 (d,  $J = 21.3$  Hz), 117.5, 120.7, 124.1, 126.0, 126.3, 127.1, 128.0, 128.4, 128.5, 128.6 (d,  $J = 8.0$  Hz), 131.4, 136.4 (d,  $J = 3.2$  Hz), 144.4, 146.5, 147.5, 162.6 (d,  $J = 246.2$  Hz); HRMS (ESI)  $m/z$  calcd for  $\text{C}_{26}\text{H}_{21}\text{FO}_2$   $[\text{M}+\text{H}]^+$ : 384.1526, found: 384.1521.

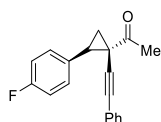

### 1-((1*S*,2*R*)-2-(4-fluorophenyl)-1-(phenylethynyl)cyclopropyl)ethan-1-one (1i)

Yellow oil, 21 mg, 37% yield; 95% ee;  $[\alpha]_{\text{D}}^{20.0} = 57.4$  (0.1,  $\text{CH}_2\text{Cl}_2$ ); [Daicel Chiralpak IC-3 (0.45 cm  $\times$  25 cm),  $n$ -hexane/2-propanol = 97/3,  $v = 1.0$  mL $\cdot$ min $^{-1}$ ,  $\lambda = 254$  nm,  $t$  (major) = 6.7 min,  $t$  (minor) = 7.7 min];  $^1\text{H}$  NMR (400 MHz,  $\text{CDCl}_3$ )  $\delta$  1.78 (dd,  $J = 7.9$ , 4.3 Hz, 1H), 2.18 (dd,  $J = 9.1$ , 4.3 Hz, 1H), 2.58 (s, 3H), 3.01 (t,  $J = 8.5$  Hz, 1H), 7.03 (t,  $J = 8.7$  Hz, 2H), 7.14 (dd,  $J = 7.6$ , 2.0 Hz, 2H), 7.21-7.27 (m, 5H);  $^{13}\text{C}$  NMR (100 MHz,  $\text{CDCl}_3$ )  $\delta$  26.7, 29.7, 33.2, 38.3, 84.6, 87.2, 114.9 (d,  $J = 21.5$  Hz), 122.9, 128.2, 128.3, 130.3 (d,  $J = 8.1$  Hz), 131.4, 131.8 (d,  $J = 3.1$  Hz), 162.2 (d,  $J = 245.7$  Hz), 204.8.

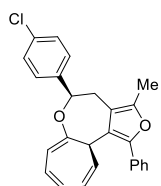

### (5*R*,11*aR*)-5-(4-chlorophenyl)-3-methyl-1-phenyl-4,5-dihydro-11aH-cyclohepta[b]furo[3,4-d]oxepine (3j)

White solid, m.p. = 110-112  $^{\circ}\text{C}$ ; 30 mg, 37% yield; 90% ee;  $[\alpha]_{\text{D}}^{20.0} = -3.1$  (0.1,  $\text{CH}_2\text{Cl}_2$ ); [Daicel Chiralpak IC-3 (0.45 cm  $\times$  25 cm),  $n$ -hexane/2-propanol = 98/2,  $v = 1.0$  mL $\cdot$ min $^{-1}$ ,  $\lambda = 254$  nm,  $t$  (major) = 4.8 min,  $t$  (minor) = 5.8 min];  $^1\text{H}$  NMR (400 MHz,  $\text{CDCl}_3$ )  $\delta$  2.15 (s, 3H), 2.93 (dd,  $J = 15.2$ , 4.6 Hz, 1H), 3.01 (dd,  $J = 15.2$ , 9.0 Hz, 1H), 3.20 (d,  $J = 5.9$  Hz, 1H), 5.01 (dd,  $J = 9.2$ , 4.7 Hz, 1H), 5.22 (dd,  $J = 9.1$ , 6.2 Hz, 1H), 5.65 (d,  $J = 6.4$  Hz, 1H), 6.23 (dd,  $J = 9.1$ , 5.7 Hz, 1H), 6.37 (dd,  $J = 11.0$ , 6.4 Hz, 1H),

6.54 (dd,  $J = 11.0, 5.5$  Hz, 1H), 7.12-7.22 (m, 4H), 7.22-7.30 (m, 3H), 7.36 (d,  $J = 7.7$  Hz, 2H);  $^{13}\text{C}$  NMR (100 MHz,  $\text{CDCl}_3$ )  $\delta$  11.6, 29.9, 40.0, 81.7, 113.4, 117.4, 120.7, 124.0, 126.0, 126.3, 127.1, 128.1, 128.2, 128.4, 128.5, 131.4, 133.9, 139.0, 144.3, 146.5, 147.5; HRMS (ESI)  $m/z$  calcd for  $\text{C}_{26}\text{H}_{21}\text{ClO}_2$   $[\text{M}+\text{H}]^+$ : 401.1303, found: 401.1300.

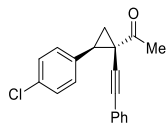

### 1-((1*S*,2*R*)-2-(4-chlorophenyl)-1-(phenylethynyl)cyclopropyl)ethan-1-one (**1j**)

Yellow oil, 22 mg, 39% yield; 82% ee;  $[\alpha]_{\text{D}}^{20.0} = 61.6$  (0.1,  $\text{CH}_2\text{Cl}_2$ ); [Daicel Chiralpak IB-3 (0.45 cm  $\times$  25 cm), *n*-hexane/2-propanol = 98/2,  $v = 1.0$  mL $\cdot$ min $^{-1}$ ,  $\lambda = 254$  nm,  $t$  (major) = 5.9 min,  $t$  (minor) = 5.4 min];  $^1\text{H}$  NMR (400 MHz,  $\text{CDCl}_3$ )  $\delta$  1.72 (dd,  $J = 7.9, 4.3$  Hz, 1H), 2.12 (dd,  $J = 9.1, 4.3$  Hz, 1H), 2.52 (s, 3H), 2.93 (t,  $J = 8.5$  Hz, 1H), 7.09 (dd,  $J = 7.4, 2.2$  Hz, 2H), 7.13-7.17 (m, 2H), 7.18-7.22 (m, 3H), 7.23-7.27 (m, 2H);  $^{13}\text{C}$  NMR (100 MHz,  $\text{CDCl}_3$ )  $\delta$  26.7, 29.7, 33.3, 38.2, 84.8, 87.0, 122.8, 128.2, 128.3, 128.4, 130.0, 131.4, 133.1, 134.6, 204.7.

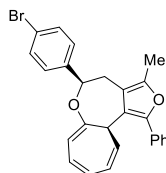

### (5*R*,11*R*)-5-(4-bromophenyl)-3-methyl-1-phenyl-4,5-dihydro-11aH-cyclohepta[b]furo[3,4-d]oxepine (**3k**)

White solid, m.p. = 122-124  $^{\circ}\text{C}$ ; 34 mg, 38% yield; 90% ee;  $[\alpha]_{\text{D}}^{20.0} = -4.8$  (0.1,  $\text{CH}_2\text{Cl}_2$ ); [Daicel Chiralpak IA-3 (0.45 cm  $\times$  25 cm), *n*-hexane/2-propanol = 97/3,  $v = 1.0$  mL $\cdot$ min $^{-1}$ ,  $\lambda = 254$  nm,  $t$  (major) = 6.2 min,  $t$  (minor) = 9.4 min];  $^1\text{H}$  NMR (400 MHz,  $\text{CDCl}_3$ )  $\delta$  2.15 (s, 3H), 2.93 (dd,  $J = 15.2, 4.8$  Hz, 1H), 3.01 (dd,  $J = 15.2, 8.9$  Hz, 1H), 3.20 (d,  $J = 6.0$  Hz, 1H), 5.00 (dd,  $J = 8.9, 4.7$  Hz, 1H), 5.22 (dd,  $J = 9.1, 6.0$  Hz, 1H), 5.66 (d,  $J = 6.3$  Hz, 1H), 6.23 (dd,  $J = 9.2, 5.6$  Hz, 1H), 6.37 (dd,  $J = 10.9, 6.3$  Hz, 1H), 6.54 (dd,  $J = 10.9, 5.5$  Hz, 1H), 7.12-7.18 (m, 3H), 7.26 (t,  $J = 7.7$  Hz, 2H), 7.34-7.43

(m, 4H);  $^{13}\text{C}$  NMR (100 MHz,  $\text{CDCl}_3$ )  $\delta$  11.6, 29.9, 40.0, 81.7, 113.4, 117.4, 120.6, 122.1, 124.0, 126.0, 126.3, 127.1, 128.1, 128.4, 128.5, 128.6, 131.3, 131.4, 139.5, 144.3, 146.5, 147.5; HRMS (ESI)  $m/z$  calcd for  $\text{C}_{26}\text{H}_{21}\text{BrO}_2$   $[\text{M}+\text{H}]^+$ : 445.0798, found: 445.0796.

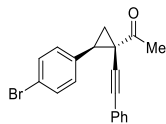

### 1-((1*S*,2*R*)-2-(4-bromophenyl)-1-(phenylethynyl)cyclopropyl)ethan-1-one (1k)

Yellow oil, 25 mg, 37% yield; 85% ee;  $[\alpha]_{\text{D}}^{20.0}=107.8$  (0.1,  $\text{CH}_2\text{Cl}_2$ ); [Daicel Chiralpak IB-3 (0.45 cm  $\times$  25 cm), *n*-hexane/2-propanol = 97/3,  $v = 1.0 \text{ mL}\cdot\text{min}^{-1}$ ,  $\lambda = 254 \text{ nm}$ ,  $t$  (major) = 6.0 min,  $t$  (minor) = 5.4 min];  $^1\text{H}$  NMR (400 MHz,  $\text{CDCl}_3$ )  $\delta$  1.78 (dd,  $J = 7.9, 4.3 \text{ Hz}$ , 1H), 2.18 (dd,  $J = 9.1, 4.3 \text{ Hz}$ , 1H), 2.58 (s, 3H), 2.98 (t,  $J = 8.5 \text{ Hz}$ , 1H), 7.12-7.20 (m, 4H), 7.23-7.28 (m, 3H), 7.46 (d,  $J = 8.4 \text{ Hz}$ , 2H);  $^{13}\text{C}$  NMR (100 MHz,  $\text{CDCl}_3$ )  $\delta$  26.6, 29.7, 33.2, 38.2, 84.9, 86.9, 121.2, 122.8, 128.3, 128.4, 130.4, 131.1, 131.4, 135.2, 204.7; HRMS (ESI)  $m/z$  calcd. for  $\text{C}_{19}\text{H}_{15}\text{BrO}$   $[\text{M}+\text{H}]^+$ : 375.0946, found: 375.0947.

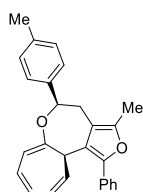

### (5*R*,11*R*)-3-methyl-1-phenyl-5-(*p*-tolyl)-4,5-dihydro-11aH-cyclohepta[b]furo[3,4-d]oxepine (3l)

White solid, m.p. = 87-89  $^\circ\text{C}$ ; 27 mg, 35% yield; 86% ee;  $[\alpha]_{\text{D}}^{20.0}=-2.1$  (0.1,  $\text{CH}_2\text{Cl}_2$ ); [Daicel Chiralpak IA-3 (0.45 cm  $\times$  25 cm), *n*-hexane/2-propanol = 97/3,  $v = 1.0 \text{ mL}\cdot\text{min}^{-1}$ ,  $\lambda = 254 \text{ nm}$ ,  $t$  (major) = 5.7 min,  $t$  (minor) = 9.7 min];  $^1\text{H}$  NMR (400 MHz,  $\text{CDCl}_3$ )  $\delta$  2.26 (s, 3H), 2.34 (s, 3H), 2.96 (dd,  $J = 15.2, 4.2 \text{ Hz}$ , 1H), 3.16 (dd,  $J = 15.2, 10.0 \text{ Hz}$ , 1H), 3.29 (d,  $J = 6.0 \text{ Hz}$ , 1H), 5.07 (dd,  $J = 10.0, 4.2 \text{ Hz}$ , 1H), 5.30 (dd,  $J = 9.2, 6.0 \text{ Hz}$ , 1H), 5.71 (d,  $J = 6.4 \text{ Hz}$ , 1H), 6.31 (dd,  $J = 9.2, 5.5 \text{ Hz}$ , 1H), 6.43 (dd,  $J =$

10.9, 6.4 Hz, 1H), 6.59 (dd,  $J = 10.9, 5.5$  Hz, 1H), 7.14 (d,  $J = 7.9$  Hz, 2H), 7.21-7.26 (m, 3H), 7.33 (t,  $J = 7.6$  Hz, 2H), 7.43 (dd,  $J = 7.5, 2H$ );  $^{13}\text{C}$  NMR (100 MHz,  $\text{CDCl}_3$ )  $\delta$  11.6, 21.3, 30.0, 40.0, 82.4, 113.2, 118.0, 121.0, 124.1, 126.0, 126.1, 126.8, 126.9, 127.7, 128.4, 128.7, 128.9, 131.4, 137.6, 137.9, 144.7, 146.4, 147.4; HRMS (ESI)  $m/z$  calcd for  $\text{C}_{27}\text{H}_{24}\text{O}_2$   $[\text{M}+\text{H}]^+$ : 381.1849, found: 381.1850.

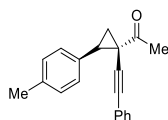

**1-((1*S*,2*R*)-1-(phenylethynyl)-2-(*p*-tolyl)cyclopropyl)ethan-1-one (11)**

Yellow oil, 20 mg, 36% yield; 94% ee;  $[\alpha]_{\text{D}}^{20.0} = 59.7$  (0.1,  $\text{CH}_2\text{Cl}_2$ ); [Daicel Chiralpak IB-3 (0.45 cm  $\times$  25 cm), *n*-hexane/2-propanol = 97/3,  $v = 1.0$  mL $\cdot$ min $^{-1}$ ,  $\lambda = 254$  nm, t (major) = 4.9 min, t (minor) = 5.1 min];  $^1\text{H}$  NMR (400 MHz,  $\text{CDCl}_3$ )  $\delta$  1.81 (dd,  $J = 8.0, 4.2$  Hz, 1H), 2.19 (dd,  $J = 9.1, 4.2$  Hz, 1H), 2.35 (s, 3H), 2.58 (s, 3H), 2.99 (t,  $J = 8.5$  Hz, 1H), 7.12-7.19 (m, 5H), 7.21-7.31 (m, 4H);  $^{13}\text{C}$  NMR (100 MHz,  $\text{CDCl}_3$ )  $\delta$  21.2, 26.7, 29.7, 33.4, 39.3, 84.4, 87.6, 123.2, 128.0, 128.2, 128.6, 128.7, 131.4, 132.9, 137.0, 205.0.

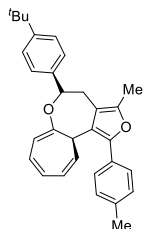

**(5*S*,11*aR*)-5-(4-(*tert*-butyl)phenyl)-3-methyl-1-(*p*-tolyl)-4,5-dihydro-11*aH*-cyclohepta[b]furo[3,4-d]oxepine (3m)**

White solid, m.p. = 80-82  $^{\circ}\text{C}$ ; 31 mg, 36% yield; 86% ee;  $[\alpha]_{\text{D}}^{20.0} = -2.3$  (0.1,  $\text{CH}_2\text{Cl}_2$ ); [Daicel Chiralpak IC-3 (0.45 cm  $\times$  25 cm), *n*-hexane/2-propanol = 97/3,  $v = 1.0$  mL $\cdot$ min $^{-1}$ ,  $\lambda = 254$  nm, t (major) = 4.9 min, t (minor) = 6.2 min];  $^1\text{H}$  NMR (400 MHz,  $\text{CDCl}_3$ )  $\delta$  1.35 (s, 9H), 2.28 (s, 3H), 2.36 (s, 3H), 3.00 (dd,  $J = 15.2, 4.0$  Hz, 1H), 3.19 (dd,  $J = 15.2, 9.9$  Hz, 1H), 3.27 (d,  $J = 6.1$  Hz, 1H), 5.11 (dd,  $J = 9.9, 3.9$  Hz, 1H), 5.33

(dd,  $J = 9.1, 6.1$  Hz, 1H), 5.79 (d,  $J = 6.3$  Hz, 1H), 6.34 (dd,  $J = 9.2, 5.5$  Hz, 1H), 6.48 (dd,  $J = 10.9, 6.3$  Hz, 1H), 6.63 (dd,  $J = 10.9, 5.4$  Hz, 1H), 7.17 (d,  $J = 7.9$  Hz, 2H), 7.31 (d,  $J = 8.4$  Hz, 2H), 7.30-7.40 (m, 4H);  $^{13}\text{C}$  NMR (100 MHz,  $\text{CDCl}_3$ )  $\delta$  11.6, 21.3, 30.6, 31.4, 34.6, 40.2, 82.6, 112.8, 118.0, 120.3, 124.3, 125.2, 125.7, 126.1, 126.5, 127.5, 128.7, 128.8, 129.1, 136.7, 137.9, 145.0, 145.9, 147.7, 151.0; HRMS (ESI)  $m/z$  calcd for  $\text{C}_{31}\text{H}_{32}\text{O}_2$   $[\text{M}+\text{H}]^+$ : 437.2475, found: 437.2480.

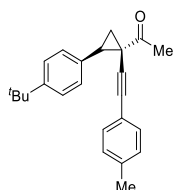

**1-((1*S*,2*R*)-2-(4-(*tert*-butyl)phenyl)-1-(*p*-tolylethynyl)cyclopropyl)ethan-1-one (1m)**

Yellow oil, 24 mg, 37% yield; 83% ee;  $[\alpha]_{\text{D}}^{20.0} = 67.3$  (0.1,  $\text{CH}_2\text{Cl}_2$ ); [Daicel Chiralpak IC-3 (0.45 cm  $\times$  25 cm), *n*-hexane/2-propanol = 97/3,  $v = 1.0$  mL $\cdot$ min $^{-1}$ ,  $\lambda = 254$  nm,  $t$  (major) = 4.5 min,  $t$  (minor) = 4.3 min];  $^1\text{H}$  NMR (400 MHz,  $\text{CDCl}_3$ )  $\delta$  1.26 (s, 9H), 1.76 (dd,  $J = 7.9, 4.2$  Hz, 1H), 2.11 (dd,  $J = 9.1, 4.2$  Hz, 1H), 2.22 (s, 3H), 2.49 (s, 3H), 2.94 (t,  $J = 8.5$  Hz, 1H), 6.88 (d,  $J = 8.2$  Hz, 2H), 6.93 (d,  $J = 8.1$  Hz, 2H), 7.11-7.18 (m, 2H), 7.26-7.33 (m, 2H);  $^{13}\text{C}$  NMR (100 MHz,  $\text{CDCl}_3$ )  $\delta$  21.5, 26.5, 29.7, 31.5, 33.4, 34.6, 39.2, 84.3, 87.0, 120.0, 125.0, 128.5, 128.9, 131.3, 133.1, 138.1, 150.2, 205.2.

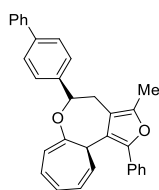

**(5*S*,11*aR*)-5-([1,1'-biphenyl]-4-yl)-3-methyl-1-phenyl-4,5-dihydro-11*aH*-cyclohepta[b]furo[3,4-d]oxepine (3n)**

White solid, m.p. = 74-76  $^\circ\text{C}$ ; 33 mg, 37% yield; 87% ee;  $[\alpha]_{\text{D}}^{20.0} = -5.5$  (0.1,  $\text{CH}_2\text{Cl}_2$ ); [Daicel Chiralpak IC-3 (0.45 cm  $\times$  25 cm), *n*-hexane/2-propanol = 97/3,  $v = 1.0$  mL $\cdot$ min $^{-1}$ ,  $\lambda = 254$  nm,  $t$  (major) = 6.2 min,  $t$  (minor) = 7.1 min];  $^1\text{H}$  NMR (400 MHz,  $\text{CDCl}_3$ )  $\delta$  2.26 (s, 3H), 3.03 (dd,  $J = 15.2, 4.3$  Hz, 1H), 3.19 (dd,  $J = 15.2, 9.5$  Hz, 1H),

3.30 (d,  $J = 6.0$  Hz, 1H), 5.15 (dd,  $J = 9.6, 4.2$  Hz, 1H), 5.32 (dd,  $J = 9.1, 6.0$  Hz, 1H), 5.78 (d,  $J = 6.4$  Hz, 1H), 6.32 (dd,  $J = 9.3, 5.6$  Hz, 1H), 6.45 (dd,  $J = 10.9, 6.4$  Hz, 1H), 6.61 (dd,  $J = 10.9, 5.5$  Hz, 1H), 7.19-7.24 (m, 1H), 7.33 (t,  $J = 7.6$  Hz, 3H), 7.38-7.47 (m, 6H), 7.55-7.60 (m, 4H);  $^{13}\text{C}$  NMR (100 MHz,  $\text{CDCl}_3$ )  $\delta$  11.6, 30.1, 40.1, 82.3, 113.3, 117.8, 120.9, 124.1, 125.9, 126.2, 126.9, 127.0, 127.1, 127.3, 127.4, 127.8, 128.4, 128.7, 128.8, 131.4, 139.6, 140.8, 141.0, 144.6, 146.4, 147.4; HRMS (ESI)  $m/z$  calcd for  $\text{C}_{32}\text{H}_{26}\text{O}_2$   $[\text{M}+\text{H}]^+$ : 443.2006, found: 443.2005.

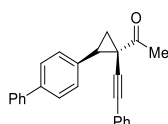

**1-((1*S*,2*R*)-2-([1,1'-biphenyl]-4-yl)-1-(phenylethynyl)cyclopropyl)ethan-1-one (1n)**

Yellow oil, 27 mg, 39% yield; 92% ee;  $[\alpha]_{\text{D}}^{20.0} = 33.6$  (0.1,  $\text{CH}_2\text{Cl}_2$ ); [Daicel Chiralpak IC-3 (0.45 cm  $\times$  25 cm), *n*-hexane/2-propanol = 97/3,  $v = 1.0$  mL $\cdot$ min $^{-1}$ ,  $\lambda = 254$  nm,  $t$  (major) = 11.4 min,  $t$  (minor) = 9.5 min];  $^1\text{H}$  NMR (400 MHz,  $\text{CDCl}_3$ )  $\delta$  1.81 (dd,  $J = 7.9, 4.3$  Hz, 1H), 2.16 (dd,  $J = 9.1, 4.3$  Hz, 1H), 2.53 (s, 3H), 3.01 (t,  $J = 8.5$  Hz, 1H), 7.03-7.09 (m, 2H), 7.10-7.18 (m, 3H), 7.25-7.32 (m, 3H), 7.38 (t,  $J = 7.5$  Hz, 2H), 7.48-7.55 (m, 4H);  $^{13}\text{C}$  NMR (100 MHz,  $\text{CDCl}_3$ )  $\delta$  26.7, 29.7, 33.5, 39.0, 84.6, 87.4, 123.0, 126.8, 127.1, 127.4, 128.1, 128.3, 128.9, 129.1, 131.4, 135.1, 140.2, 140.9, 204.9.

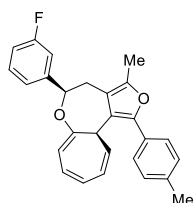

**(5*R*,11*R*)-5-(3-fluorophenyl)-3-methyl-1-(*p*-tolyl)-4,5-dihydro-11aH-cyclohepta[b]furo[3,4-d]oxepine (3o)**

White solid, m.p. = 90-92  $^\circ\text{C}$ ; 32 mg, 40% yield; 87% ee;  $[\alpha]_{\text{D}}^{20.0} = -1.5$  (0.1,  $\text{CH}_2\text{Cl}_2$ ); [Daicel Chiralpak IA-3 (0.45 cm  $\times$  25 cm), *n*-hexane/2-propanol = 97/3,  $v = 1.0$  mL $\cdot$ min $^{-1}$ ,  $\lambda = 254$  nm,  $t$  (major) = 6.0 min,  $t$  (minor) = 9.7 min];  $^1\text{H}$  NMR (400 MHz,  $\text{CDCl}_3$ )  $\delta$  2.16 (s, 3H), 2.34 (s, 3H), 3.07 (dd,  $J = 6.3, 4.4$  Hz, 2H), 3.15 (d,  $J = 6.2$  Hz, 1H), 5.30 (dd,  $J = 9.1, 6.3$  Hz, 1H), 5.53 (dd,  $J = 7.6, 4.9$  Hz, 1H), 5.82 (d,  $J = 6.3$  Hz, 1H), 6.30 (dd,  $J = 9.1, 5.5$  Hz, 1H), 6.49 (dd,  $J = 10.9, 6.2$  Hz, 1H), 6.64 (dd,  $J = 10.8,$

5.5 Hz, 1H), 7.02-7.11 (m, 2H), 7.14 (d,  $J = 7.9$  Hz, 2H), 7.24-7.30 (m, 1H), 7.31-7.39 (m, 3H);  $^{13}\text{C}$  NMR (100 MHz,  $\text{CDCl}_3$ )  $\delta$  11.4, 21.3, 30.1, 40.4, 75.9 (d,  $J = 3.3$  Hz), 112.5, 115.3 (d,  $J = 21.9$  Hz), 117.4, 119.8, 123.9 (d,  $J = 3.6$  Hz), 124.1, 125.4, 126.4, 127.7 (d,  $J = 3.8$  Hz), 127.9, 128.1 (d,  $J = 13.0$  Hz), 128.5, 128.7, 129.0, 129.4 (d,  $J = 8.3$  Hz), 136.8, 144.6, 146.3, 147.8, 159.6 (d,  $J = 246.3$  Hz); HRMS (ESI)  $m/z$  calcd for  $\text{C}_{27}\text{H}_{23}\text{FO}_2$   $[\text{M}+\text{H}]^+$ : 399.1405, found: 399.1403.

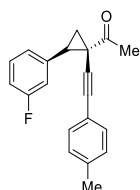

**1-((1*S*,2*R*)-2-(3-fluorophenyl)-1-(*p*-tolylethynyl)cyclopropyl)ethan-1-one (1o)**

Yellow oil, 22 mg, 38% yield; 96% ee;  $[\alpha]_{\text{D}}^{20.0} = 21.5$  (0.1,  $\text{CH}_2\text{Cl}_2$ ); [Daicel Chiralpak IB-3 (0.45 cm  $\times$  25 cm), *n*-hexane/2-propanol = 97/3,  $v = 1.0$  mL $\cdot$ min $^{-1}$ ,  $\lambda = 254$  nm,  $t$  (major) = 7.0 min,  $t$  (minor) = 6.7 min];  $^1\text{H}$  NMR (400 MHz,  $\text{CDCl}_3$ )  $\delta$  1.81 (dd,  $J = 7.9, 4.3$  Hz, 1H), 2.21 (dd,  $J = 9.0, 4.3$  Hz, 1H), 2.29 (s, 3H), 2.59 (s, 3H), 3.05 (t,  $J = 8.5$  Hz, 1H), 6.95 (d,  $J = 8.1$  Hz, 2H), 7.00 (d,  $J = 8.0$  Hz, 2H), 7.02-7.13 (m, 2H), 7.18 (t,  $J = 7.4$  Hz, 1H), 7.24-7.28 (m, 1H);  $^{13}\text{C}$  NMR (100 MHz,  $\text{CDCl}_3$ )  $\delta$  21.5, 25.0, 29.5, 32.2, 32.8 (d,  $J = 4.3$  Hz), 83.8, 86.3, 115.1 (d,  $J = 21.5$  Hz), 119.8, 123.5 (d,  $J = 3.6$  Hz), 123.9 (d,  $J = 14.2$  Hz), 128.9 (d,  $J = 8.2$  Hz), 129.0, 129.3 (d,  $J = 3.6$  Hz), 131.3, 138.2, 162.7 (d,  $J = 247.7$  Hz), 204.9.

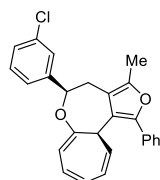

**(5*R*,11*R*)-5-(3-chlorophenyl)-3-methyl-1-phenyl-4,5-dihydro-11aH-cyclohepta[b]furo[3,4-d]oxepine (3p)**

White solid, m.p. = 80-82 °C; 27 mg, 34% yield; 92% ee;  $[\alpha]_D^{20.0} = -2.1$  (0.1, CH<sub>2</sub>Cl<sub>2</sub>); [Daicel Chiralpak IC-3 (0.45 cm × 25 cm), *n*-hexane/2-propanol = 97/3,  $\nu = 1.0$  mL•min<sup>-1</sup>,  $\lambda = 254$  nm, t (major) = 4.3 min, t (minor) = 4.8 min]; <sup>1</sup>H NMR (400 MHz, CDCl<sub>3</sub>)  $\delta$  2.23 (s, 3H), 2.99-3.12 (m, 2H), 3.24 (d, *J* = 6.1 Hz, 1H), 5.09 (dd, *J* = 8.6, 4.8 Hz, 1H), 5.29 (dd, *J* = 9.1, 6.1 Hz, 1H), 5.78 (d, *J* = 6.3 Hz, 1H), 6.31 (dd, *J* = 9.2, 5.5 Hz, 1H), 6.46 (dd, *J* = 10.9, 6.3 Hz, 1H), 6.63 (dd, *J* = 10.9, 5.5 Hz, 1H), 7.20-7.29 (m, 4H), 7.31-7.36 (m, 3H), 7.42-7.46 (m, 2H); <sup>13</sup>C NMR (100 MHz, CDCl<sub>3</sub>)  $\delta$  11.5, 30.2, 40.1, 81.8, 113.2, 117.3, 120.6, 124.0, 124.8, 125.9, 126.3, 127.0, 127.1, 128.1, 128.2, 128.4, 128.5, 129.6, 131.3, 134.2, 142.7, 144.3, 146.6, 147.6; HRMS (ESI) *m/z* calcd for C<sub>26</sub>H<sub>21</sub>ClO<sub>2</sub> [M+H]<sup>+</sup>: 401.1303, found: 401.1296 .

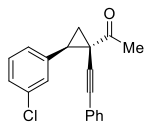

**1-((1*S*,2*R*)-2-(3-chlorophenyl)-1-(phenylethynyl)cyclopropyl)ethan-1-one (1p)**

Yellow oil, 21 mg, 36% yield; 96% ee;  $[\alpha]_D^{20.0} = 63.4$  (0.1, CH<sub>2</sub>Cl<sub>2</sub>); [Daicel Chiralpak IC-3 (0.45 cm × 25 cm), *n*-hexane/2-propanol = 97/3,  $\nu = 1.0$  mL•min<sup>-1</sup>,  $\lambda = 254$  nm, t (major) = 6.7 min, t (minor) = 6.4 min]; <sup>1</sup>H NMR (400 MHz, CDCl<sub>3</sub>)  $\delta$  1.80 (dd, *J* = 7.9, 4.4 Hz, 1H), 2.18 (dd, *J* = 9.1, 4.4 Hz, 1H), 2.59 (s, 3H), 3.00 (t, *J* = 8.5 Hz, 1H), 7.14-7.21 (m, 3H), 7.23-7.29 (m, 6H); <sup>13</sup>C NMR (100 MHz, CDCl<sub>3</sub>)  $\delta$  26.6, 29.7, 33.3, 38.2, 85.0, 86.8, 122.8, 127.2, 127.5, 128.3, 128.4, 128.7, 129.3, 131.4, 133.9, 138.2, 204.6.

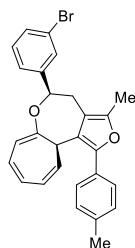

**(5*R*,11*R*)-5-(3-bromophenyl)-3-methyl-1-(*p*-tolyl)-4,5-dihydro-11aH-cyclohepta[b]furo[3,4-d]oxepine (3q)**



White solid, m.p. = 110-112 °C; 35 mg, 38% yield; 87% ee;  $[\alpha]_{\text{D}}^{20.0} = -2.4$  (0.1, CH<sub>2</sub>Cl<sub>2</sub>); [Daicel Chiralpak IC-3 (0.45 cm × 25 cm), *n*-hexane/2-propanol = 97/3,  $\nu = 1.0$  mL•min<sup>-1</sup>,  $\lambda = 254$  nm, t (major) = 4.6 min, t (minor) = 5.4 min]; <sup>1</sup>H NMR (400 MHz, CDCl<sub>3</sub>)  $\delta$  2.13 (s, 3H); 2.26 (s, 3H), 2.97 (dd, *J* = 6.7, 4.8 Hz, 2H), 3.13 (d, *J* = 6.1 Hz, 1H), 5.00 (dd, *J* = 8.2, 5.0 Hz, 1H), 5.21 (dd, *J* = 9.1, 6.1 Hz, 1H), 5.70 (d, *J* = 6.3 Hz, 1H), 6.22 (dd, *J* = 9.2, 5.5 Hz, 1H), 6.38 (dd, *J* = 10.9, 6.3 Hz, 1H), 6.55 (dd, *J* = 10.9, 5.5 Hz, 1H), 7.07 (d, *J* = 8.0 Hz, 2H), 7.12 (d, *J* = 7.8 Hz, 1H), 7.16-7.21 (m, 1H), 7.25 (d, *J* = 8.0 Hz, 2H), 7.31-7.38 (m, 1H), 7.42 (s, 1H); <sup>13</sup>C NMR (100 MHz, CDCl<sub>3</sub>)  $\delta$  11.5, 21.3, 30.4, 40.1, 81.8, 113.0, 117.2, 119.9, 122.4, 124.2, 125.3, 125.7, 126.3, 128.0, 128.4, 128.6, 129.1, 129.8, 129.9, 131.1, 136.9, 143.0, 144.4, 146.2, 147.8; HRMS (ESI) *m/z* calcd for C<sub>27</sub>H<sub>23</sub>BrO<sub>2</sub> [M+H]<sup>+</sup>: 459.0890, found: 459.0894.

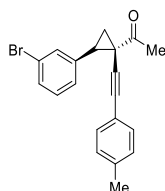

### 1-((1*S*,2*R*)-2-(3-bromophenyl)-1-(*p*-tolylethynyl)cyclopropyl)ethan-1-one (1q)

Yellow oil, 26 mg, 37% yield; 97% ee;  $[\alpha]_{\text{D}}^{20.0} = 41.1$  (0.1, CH<sub>2</sub>Cl<sub>2</sub>); [Daicel Chiralpak IC-3 (0.45 cm × 25 cm), *n*-hexane/2-propanol = 97/3,  $\nu = 1.0$  mL•min<sup>-1</sup>,  $\lambda = 254$  nm, t (major) = 7.4 min, t (minor) = 7.2 min]; <sup>1</sup>H NMR (400 MHz, CDCl<sub>3</sub>)  $\delta$  1.78 (dd, *J* = 7.9, 4.4 Hz, 1H), 2.16 (dd, *J* = 9.1, 4.3 Hz, 1H), 2.31 (s, 3H), 2.58 (s, 3H), 2.97 (t, *J* = 8.5 Hz, 1H), 7.05 (d, *J* = 8.0 Hz, 2H), 7.10 (d, *J* = 8.0 Hz, 2H), 7.17-7.24 (m, 2H), 7.36-7.43 (m, 1H), 7.44 (s, 1H); <sup>13</sup>C NMR (100 MHz, CDCl<sub>3</sub>)  $\delta$  21.5, 26.6, 29.7, 33.3, 38.0, 85.2, 85.9, 119.7, 122.1, 127.7, 129.1, 129.5, 130.3, 131.4, 131.6, 138.4, 138.5, 204.8.

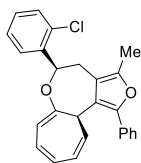

**(5*R*,11*R*)-5-(2-chlorophenyl)-3-methyl-1-phenyl-4,5-dihydro-11aH-cyclohepta[b]furo[3,4-d]oxepine (3r)**

White solid, m.p. = 98-100 °C; 29 mg, 36% yield; 86% ee;  $[\alpha]_{\text{D}}^{20.0} = -1.9$  (0.1, CH<sub>2</sub>Cl<sub>2</sub>); [Daicel Chiralpak IC-3 (0.45 cm × 25 cm), *n*-hexane/2-propanol = 99.5/0.5,  $\nu = 1.0$  mL•min<sup>-1</sup>,  $\lambda = 254$  nm, t (major) = 6.0 min, t (minor) = 6.3 min]; <sup>1</sup>H NMR (400 MHz, CDCl<sub>3</sub>)  $\delta$  2.03 (s, 3H), 2.91 (dd,  $J = 15.2, 7.3$  Hz, 1H), 2.99 (d,  $J = 6.4$  Hz, 1H), 3.06 (dd,  $J = 15.2, 6.4$  Hz, 1H), 5.22 (t,  $J = 7.7$  Hz, 1H), 5.53 (dd,  $J = 7.3, 3.6$  Hz, 1H), 5.83 (d,  $J = 6.2$  Hz, 1H), 6.20-6.27 (m, 1H), 6.46 (dd,  $J = 10.7, 6.6$  Hz, 1H), 6.60 (dd,  $J = 10.8, 5.7$  Hz, 1H), 7.11-7.16 (m, 3H), 7.24 (d,  $J = 7.1$  Hz, 2H), 7.26-7.24 (m, 2H), 7.36-7.39 (m, 2H); <sup>13</sup>C NMR (100 MHz, CDCl<sub>3</sub>)  $\delta$  11.3, 30.3, 40.7, 79.5, 111.8, 117.5, 120.3, 123.8, 125.1, 126.6, 126.7, 127.0, 127.5, 127.7, 128.3, 128.5, 128.9, 129.3, 131.4, 131.8, 138.6, 144.6, 146.8, 147.7; HRMS (ESI)  $m/z$  calcd for C<sub>26</sub>H<sub>21</sub>ClO<sub>2</sub> [M+H]<sup>+</sup>: 401.1213, found: 401.1217.

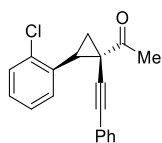

**1-((1*S*,2*R*)-2-(2-chlorophenyl)-1-(phenylethynyl)cyclopropyl)ethan-1-one (1r)**

Yellow oil, 25 mg, 42% yield; 82% ee;  $[\alpha]_{\text{D}}^{20.0} = 52.3$  (0.1, CH<sub>2</sub>Cl<sub>2</sub>); [Daicel Chiralpak IC-3 (0.45 cm × 25 cm), *n*-hexane/2-propanol = 97/3,  $\nu = 1.0$  mL•min<sup>-1</sup>,  $\lambda = 254$  nm, t (major) = 7.0 min, t (minor) = 8.1 min]; <sup>1</sup>H NMR (400 MHz, CDCl<sub>3</sub>)  $\delta$  1.86 (dd,  $J = 8.0, 4.3$  Hz, 1H), 2.26 (dd,  $J = 8.8, 4.3$  Hz, 1H), 2.62 (s, 3H), 3.06 (t,  $J = 8.4$  Hz, 1H), 6.94-7.04 (m, 2H), 7.17-7.23 (m, 4H), 7.24-7.27 (m, 2H), 7.41-7.46 (m, 1H); <sup>13</sup>C NMR (100 MHz, CDCl<sub>3</sub>)  $\delta$  25.2, 29.4, 32.1, 37.8, 83.2, 87.0, 122.9, 126.5, 128.0, 128.2, 128.7, 129.2, 129.4, 131.4, 134.7, 136.8, 204.9.

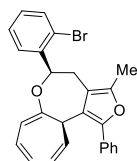

**(5*R*,11*R*)-5-(2-bromophenyl)-3-methyl-1-phenyl-4,5-dihydro-11aH-cyclohepta[b]furo[3,4-d]oxepine (3s)**

White solid, m.p. = 126-128 °C; 33 mg, 37% yield; 85% ee;  $[\alpha]_{\text{D}}^{20.0} = -1.6$  (0.1, CH<sub>2</sub>Cl<sub>2</sub>); [Daicel Chiralpak IC-3 (0.45 cm × 25 cm), *n*-hexane/2-propanol = 97/3,  $\nu = 1.0$  mL•min<sup>-1</sup>,  $\lambda = 254$  nm, t (major) = 5.1 min, t (minor) = 5.4 min]; <sup>1</sup>H NMR (400 MHz, CDCl<sub>3</sub>)  $\delta$  2.04 (s, 3H), 2.90 (dd, *J* = 15.3, 7.3 Hz, 1H), 2.98 (d, *J* = 6.5 Hz, 1H), 3.08 (dd, *J* = 15.2, 3.7 Hz, 1H), 5.23 (dd, *J* = 8.9, 6.5 Hz, 1H), 5.47 (dd, *J* = 7.3, 3.7 Hz, 1H), 5.84 (d, *J* = 6.2 Hz, 1H), 6.24 (dd, *J* = 9.1, 5.5 Hz, 1H), 6.48 (dd, *J* = 10.8, 6.2 Hz, 1H), 6.60 (dd, *J* = 10.8, 5.5 Hz, 1H), 7.07 (t, *J* = 7.6 Hz, 1H), 7.14-7.21 (m, 2H), 7.25 (d, *J* = 7.8 Hz, 2H), 7.32 (d, *J* = 7.0 Hz, 1H), 7.37 (d, *J* = 7.7 Hz, 2H), 7.48 (d, *J* = 7.9 Hz, 1H); <sup>13</sup>C NMR (100 MHz, CDCl<sub>3</sub>)  $\delta$  11.3, 30.5, 40.7, 81.8, 111.7, 117.5, 120.3, 122.0, 123.8, 125.1, 125.7, 126.6, 127.0, 127.3, 127.7, 128.3, 128.5, 129.2, 131.4, 132.6, 140.2, 144.6, 146.8, 147.7; HRMS (ESI) *m/z* calcd for C<sub>26</sub>H<sub>21</sub>BrO<sub>2</sub> [M+H]<sup>+</sup>: 445.0798, found: 445.0796.

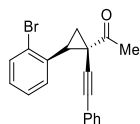

**1-((1*S*,2*R*)-2-(2-bromophenyl)-1-(phenylethynyl)cyclopropyl)ethan-1-one (1s)**

Yellow oil, 25 mg, 37% yield; 93% ee;  $[\alpha]_{\text{D}}^{20.0} = 32.9$  (0.1, CH<sub>2</sub>Cl<sub>2</sub>); [Daicel Chiralpak IC-3 (0.45 cm × 25 cm), *n*-hexane/2-propanol = 97/3,  $\nu = 1.0$  mL•min<sup>-1</sup>,  $\lambda = 254$  nm, t (major) = 7.4 min, t (minor) = 8.5 min]; <sup>1</sup>H NMR (400 MHz, CDCl<sub>3</sub>)  $\delta$  1.79 (dd, *J* = 8.0, 4.3 Hz, 1H), 2.18 (dd, *J* = 8.7, 4.3 Hz, 1H), 2.56 (s, 3H), 2.96 (t, *J* = 8.4 Hz, 1H), 6.85-6.96 (m, 2H), 7.06-7.16 (m, 5H), 7.22 (t, *J* = 7.1 Hz, 1H), 7.55 (d, *J* = 7.7 Hz, 1H); <sup>13</sup>C NMR (100 MHz, CDCl<sub>3</sub>)  $\delta$  25.7, 29.5, 32.3, 40.4, 83.3, 87.0, 122.9, 127.1, 127.5, 128.0, 128.2, 128.9, 129.6, 131.4, 132.4, 136.4, 205.0.

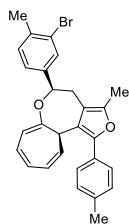

**(5*R*,11*R*)-5-(3-bromo-4-methylphenyl)-3-methyl-1-(*p*-tolyl)-4,5-dihydro-11aH-cyclohepta[b]furo[3,4-d]oxepine (3t)**

White solid, m.p. = 70-74 °C; 36 mg, 38% yield; 94% ee;  $[\alpha]_{\text{D}}^{20.0} = -3.6$  (0.1, CH<sub>2</sub>Cl<sub>2</sub>); [Daicel Chiralpak IC-3 (0.45 cm × 25 cm), *n*-hexane/2-propanol = 97/3,  $v = 1.0$  mL•min<sup>-1</sup>,  $\lambda = 254$  nm, t (major) = 4.8 min, t (minor) = 6.1 min]; <sup>1</sup>H NMR (400 MHz, CDCl<sub>3</sub>)  $\delta$  2.26 (s, 3H), 2.36 (s, 3H), 2.40 (s, 3H), 3.00 (dd,  $J = 15.2, 4.4$  Hz, 1H), 3.11 (dd,  $J = 15.2, 9.3$  Hz, 1H), 3.25 (d,  $J = 6.0$  Hz, 1H), 5.06 (dd,  $J = 9.3, 4.3$  Hz, 1H), 5.31 (dd,  $J = 9.1, 6.0$  Hz, 1H), 5.77 (d,  $J = 6.3$  Hz, 1H), 6.32 (dd,  $J = 9.2, 5.5$  Hz, 1H), 6.47 (dd,  $J = 10.9, 6.3$  Hz, 1H), 6.63 (dd,  $J = 10.8, 5.5$  Hz, 1H), 7.14-7.23 (m, 4H), 7.35 (d,  $J = 8.0$  Hz, 2H), 7.54 (s, 1H); <sup>13</sup>C NMR (100 MHz, CDCl<sub>3</sub>)  $\delta$  11.6, 21.3, 22.7, 30.2, 40.0, 81.5, 113.1, 117.4, 120.0, 124.2, 124.7, 125.6, 125.8, 126.2, 127.9, 128.5, 128.6, 129.1, 130.6, 130.8, 136.8, 137.6, 140.1, 144.4, 146.1, 147.7; HRMS (ESI)  $m/z$  calcd for C<sub>28</sub>H<sub>25</sub>BrO<sub>2</sub> [M+H]<sup>+</sup>: 473.1111, found: 473.1106 .

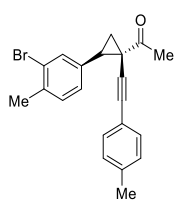

**1-((1*S*,2*R*)-2-(3-bromo-4-methylphenyl)-1-(*p*-tolylethynyl)cyclopropyl)ethan-1-one (1t)**

Yellow oil, 27 mg, 37% yield; 91% ee;  $[\alpha]_{\text{D}}^{20.0} = 33.3$  (0.1, CH<sub>2</sub>Cl<sub>2</sub>); [Daicel Chiralpak IJ-3 (0.45 cm × 25 cm), *n*-hexane/2-propanol = 95/5,  $v = 1.0$  mL•min<sup>-1</sup>,  $\lambda = 254$  nm, t (major) = 8.6 min, t (minor) = 7.6 min]; <sup>1</sup>H NMR (400 MHz, CDCl<sub>3</sub>)  $\delta$  1.67 (dd,  $J = 7.9, 4.3$  Hz, 1H), 2.08 (dd,  $J = 9.1, 4.3$  Hz, 1H), 2.23 (s, 3H), 2.30 (s, 3H), 2.50 (s, 3H), 2.85

(t,  $J = 8.5$  Hz, 1H), 6.98 (d,  $J = 7.9$  Hz, 2H), 7.01-7.07 (m, 3H), 7.09 (d,  $J = 7.8$  Hz, 1H), 7.39 (d,  $J = 1.8$  Hz, 1H);  $^{13}\text{C}$  NMR (100 MHz,  $\text{CDCl}_3$ )  $\delta$  21.5, 22.6, 26.7, 29.6, 33.3, 37.9, 85.1, 86.2, 119.8, 124.4, 127.8, 129.0, 130.2, 131.4, 132.2, 135.6, 136.7, 138.3, 204.8.

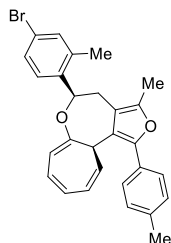

**(5*R*,11*R*)-5-(4-bromo-2-methylphenyl)-3-methyl-1-(*p*-tolyl)-4,5-dihydro-11aH-cyclohepta[b]furo[3,4-d]oxepine (3u)**

White solid, m.p. = 78-80 °C; 33 mg, 35% yield; 83% ee;  $[\alpha]_{\text{D}}^{20.0} = -3.2$  (0.1,  $\text{CH}_2\text{Cl}_2$ ); [Daicel Chiralpak IB-3 (0.45 cm  $\times$  25 cm), *n*-hexane/2-propanol = 97/3,  $v = 1.0$  mL $\cdot$ min $^{-1}$ ,  $\lambda = 254$  nm,  $t$  (major) = 5.0 min,  $t$  (minor) = 5.2 min];  $^1\text{H}$  NMR (400 MHz,  $\text{CDCl}_3$ )  $\delta$  2.19 (s, 3H), 2.33 (s, 3H), 2.37 (s, 3H), 2.93 (dd,  $J = 15.2, 3.9$  Hz, 1H), 3.09 (dd,  $J = 15.2, 8.8$  Hz, 1H), 3.15 (d,  $J = 6.2$  Hz, 1H), 5.25-5.31 (m, 2H), 5.69 (d,  $J = 6.3$  Hz, 1H), 6.30 (dd,  $J = 9.1, 5.5$  Hz, 1H), 6.45 (dd,  $J = 10.9, 6.3$  Hz, 1H), 6.61 (dd,  $J = 10.9, 5.5$  Hz, 1H), 7.10-7.19 (m, 3H), 7.26 (s, 1H), 7.32 (d,  $J = 8.0$  Hz, 3H);  $^{13}\text{C}$  NMR (100 MHz,  $\text{CDCl}_3$ )  $\delta$  11.5, 19.2, 21.3, 29.4, 40.3, 78.6, 112.2, 117.6, 120.0, 121.7, 124.0, 125.6, 126.2, 127.5, 127.7, 128.5, 128.6, 128.8, 129.1, 133.1, 136.8, 137.5, 137.6, 144.5, 146.1, 147.8; HRMS (ESI)  $m/z$  calcd for  $\text{C}_{28}\text{H}_{25}\text{BrO}_2$   $[\text{M}+\text{H}]^+$ : 473.1111, found: 473.1009.

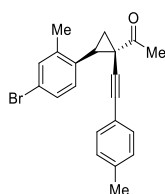

**1-((1*S*,2*R*)-2-(4-bromo-2-methylphenyl)-1-(*p*-tolylethynyl)cyclopropyl)ethan-1-one (1u)**

Yellow oil, 24 mg, 36% yield; 90% ee;  $[\alpha]_{\text{D}}^{20.0} = 56.3$  (0.1,  $\text{CH}_2\text{Cl}_2$ ); [Daicel Chiralpak IJ-3 (0.45 cm  $\times$  25 cm), *n*-hexane/2-propanol = 95/5,  $v = 1.0 \text{ mL}\cdot\text{min}^{-1}$ ,  $\lambda = 254 \text{ nm}$ ,  $t$  (major) = 8.5 min,  $t$  (minor) = 10.0 min];  $^1\text{H NMR}$  (400 MHz,  $\text{CDCl}_3$ )  $\delta$  1.85 (dd,  $J = 8.0, 4.1 \text{ Hz}$ , 1H), 2.16 (dd,  $J = 8.8, 4.1 \text{ Hz}$ , 1H), 2.28 (s, 3H), 2.30 (s, 3H), 2.61 (s, 3H), 2.89 (t,  $J = 8.4 \text{ Hz}$ , 1H), 6.89 (d,  $J = 8.0 \text{ Hz}$ , 2H), 6.99-7.04 (m, 3H), 7.31 (dd,  $J = 8.2, 2.1 \text{ Hz}$ , 1H), 7.37 (d,  $J = 2.0 \text{ Hz}$ , 1H);  $^{13}\text{C NMR}$  (100 MHz,  $\text{CDCl}_3$ )  $\delta$  19.5, 21.5, 26.3, 29.4, 32.0, 37.1, 83.7, 86.0, 119.7, 121.2, 128.7, 129.0, 129.6, 131.3, 132.6, 134.3, 138.3, 141.1, 205.2.

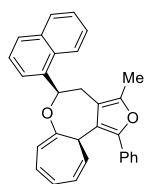

**(5*R*,11*aR*)-3-methyl-5-(naphthalen-1-yl)-1-phenyl-4,5-dihydro-11*aH*-cyclohepta[b]furo[3,4-*d*]oxepine (3*v*)**

White solid, m.p. = 90-92 °C; 37 mg, 44% yield; 80% ee;  $[\alpha]_{\text{D}}^{20.0} = -4.8$  (0.1,  $\text{CH}_2\text{Cl}_2$ ); [Daicel Chiralpak IA-3 (0.45 cm  $\times$  25 cm), *n*-hexane/2-propanol = 97/3,  $v = 1.0 \text{ mL}\cdot\text{min}^{-1}$ ,  $\lambda = 254 \text{ nm}$ ,  $t$  (major) = 6.4 min,  $t$  (minor) = 5.8 min];  $^1\text{H NMR}$  (400 MHz,  $\text{CDCl}_3$ )  $\delta$  2.20 (s, 3H), 3.15 (dd,  $J = 15.1, 3.6 \text{ Hz}$ , 1H), 3.28 (dd,  $J = 15.1, 5.1 \text{ Hz}$ , 1H), 3.35 (dd,  $J = 15.1, 9.1 \text{ Hz}$ , 1H), 5.33 (dd,  $J = 9.1, 6.2 \text{ Hz}$ , 1H), 5.64 (d,  $J = 6.3 \text{ Hz}$ , 1H), 5.94 (dd,  $J = 9.1, 3.5 \text{ Hz}$ , 1H), 6.33 (dd,  $J = 9.1, 5.5 \text{ Hz}$ , 1H), 6.42 (dd,  $J = 10.9, 6.3 \text{ Hz}$ , 1H), 6.60 (dd,  $J = 10.8, 5.5 \text{ Hz}$ , 1H), 7.20-7.25 (m, 1H), 7.34 (t,  $J = 7.7 \text{ Hz}$ , 2H), 7.41-7.49 (m, 3H), 7.50-7.58 (m, 3H), 7.81 (d,  $J = 8.2 \text{ Hz}$ , 1H), 7.89 (d,  $J = 7.7 \text{ Hz}$ , 1H), 8.13 (d,  $J = 8.3 \text{ Hz}$ , 1H);  $^{13}\text{C NMR}$  (100 MHz,  $\text{CDCl}_3$ )  $\delta$  11.5, 30.0, 40.5, 78.8, 112.1, 118.3, 121.0, 123.4, 123.5, 123.9, 125.2, 125.6, 126.2, 126.4, 127.0, 127.5, 128.4, 128.6, 128.7, 129.0, 130.8, 131.4, 133.8, 135.8, 141.5, 144.6, 146.5, 147.7; HRMS (ESI)  $m/z$  calcd for  $\text{C}_{30}\text{H}_{24}\text{O}_2$   $[\text{M}+\text{H}]^+$ : 417.1849, found: 417.1846.

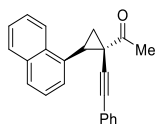

**1-((1*S*,2*R*)-2-(naphthalen-1-yl)-1-(phenylethynyl)cyclopropyl)ethan-1-one (1v)**

Yellow oil, 22 mg, 35% yield; 98% ee;  $[\alpha]_{\text{D}}^{20.0}=65.7$  (0.1, CH<sub>2</sub>Cl<sub>2</sub>); [Daicel Chiralpak IC-3 (0.45 cm × 25 cm), *n*-hexane/2-propanol = 97/3,  $v = 1.0 \text{ mL}\cdot\text{min}^{-1}$ ,  $\lambda = 254 \text{ nm}$ ,  $t$  (major) = 7.1 min,  $t$  (minor) = 8.0 min]; <sup>1</sup>H NMR (400 MHz, CDCl<sub>3</sub>)  $\delta$  2.06 (dd,  $J = 7.9, 4.0 \text{ Hz}$ , 1H), 2.30 (dd,  $J = 8.8, 4.0 \text{ Hz}$ , 1H), 2.67 (s, 3H), 3.51 (t,  $J = 8.4 \text{ Hz}$ , 1H), 6.62-6.76 (m, 2H), 6.99-7.07 (m, 2H), 7.10 (dd,  $J = 6.9, 2.0 \text{ Hz}$ , 1H), 7.36 (d,  $J = 7.1 \text{ Hz}$ , 1H), 7.44 (t,  $J = 7.6 \text{ Hz}$ , 1H), 7.48-7.55 (m, 2H), 7.81 (d,  $J = 8.2 \text{ Hz}$ , 1H), 7.86-7.92 (m, 1H), 7.94-8.00 (m, 1H); <sup>13</sup>C NMR (100 MHz, CDCl<sub>3</sub>)  $\delta$  26.5, 29.8, 32.7, 36.6, 83.4, 87.3, 122.8, 123.6, 125.1, 125.8, 125.9, 126.3, 127.8, 128.0, 128.2, 128.7, 131.3, 132.8, 133.4, 133.6, 205.5.

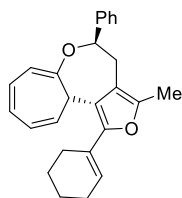

**(5*R*,11*aS*)-1-(cyclohex-1-en-1-yl)-3-methyl-5-phenyl-4,5-dihydro-11*a*H-cyclohepta[b]furo[3,4-d]oxepine (3w)**

Yellow solid, 25 mg, 34% yield; 35% ee;  $[\alpha]_{\text{D}}^{20.0}=42.3$  (0.1, CH<sub>2</sub>Cl<sub>2</sub>); [Daicel Chiralpak IC-3 (0.45 cm × 25 cm), *n*-hexane/2-propanol = 97/3,  $v = 1.0 \text{ mL}\cdot\text{min}^{-1}$ ,  $\lambda = 254 \text{ nm}$ ,  $t$  (major) = 3.9 min,  $t$  (minor) = 5.2 min]; <sup>1</sup>H NMR (400 MHz, CDCl<sub>3</sub>)  $\delta$  1.56-1.64 (m, 2H), 1.65-1.70 (m, 2H), 2.09-2.16 (m, 2H), 2.17 (s, 3H), 2.21-2.30 (m, 1H), 2.32-2.40 (m, 1H), 2.90 (dd,  $J = 15.1, 4.2 \text{ Hz}$ , 1H), 3.09 (dd,  $J = 15.2, 10.0 \text{ Hz}$ , 1H), 3.18 (d,  $J = 5.9 \text{ Hz}$ , 1H), 5.04 (dd,  $J = 10.0, 4.2 \text{ Hz}$ , 1H), 5.27 (dd,  $J = 9.2, 5.9 \text{ Hz}$ , 1H), 5.69 (d,  $J = 6.4 \text{ Hz}$ , 1H), 5.80 (dt,  $J = 4.0, 2.2 \text{ Hz}$ , 1H), 6.21-6.29 (m, 1H), 6.40 (dd,  $J = 11.0, 6.3 \text{ Hz}$ , 1H), 6.54 (dd,  $J = 10.9, 5.5 \text{ Hz}$ , 1H), 7.28-7.34 (m, 5H); <sup>13</sup>C NMR (100 MHz, CDCl<sub>3</sub>)  $\delta$  11.4, 22.2, 22.7, 25.5, 26.4, 29.8, 39.9, 82.4, 113.2, 117.1, 119.1, 124.8, 125.4, 125.8, 126.9, 127.7, 128.1, 128.2, 128.5, 128.6, 140.7, 144.6, 145.1, 149.7; HRMS (ESI)  $m/z$  calcd for C<sub>26</sub>H<sub>26</sub>O<sub>2</sub> [M+H]<sup>+</sup>: 371.2006, found: 371.2009.

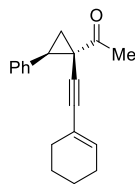

**1-((1*S*,2*R*)-1-(cyclohex-1-en-1-ylethynyl)-2-phenylcyclopropyl)ethan-1-one (1w)**

Yellow oil, 19.5 mg, 37% yield;  $[\alpha]_D^{20.0} = -55.2$  (0.1, CH<sub>2</sub>Cl<sub>2</sub>); 53% ee; [Daicel Chiralpak IB-3 (0.45 cm × 25 cm), *n*-hexane/2-propanol = 97/3,  $v = 1.0$  mL•min<sup>-1</sup>,  $\lambda = 254$  nm,  $t$  (major) = 4.4 min,  $t$  (minor) = 4.8 min]; <sup>1</sup>H NMR (400 MHz, CDCl<sub>3</sub>)  $\delta$  1.45-1.57 (m, 4H), 1.71 (dd,  $J = 7.9, 4.2$  Hz, 1H), 1.87 (tq,  $J = 4.9, 2.1$  Hz, 2H), 2.00 (td,  $J = 5.8, 2.9$  Hz, 2H), 2.11 (dd,  $J = 9.1, 4.2$  Hz, 1H), 2.51 (s, 3H), 2.94 (dd,  $J = 9.1, 8.0$  Hz, 1H), 5.81 (tt,  $J = 4.0, 1.9$  Hz, 1H), 7.20-7.27 (m, 3H), 7.28-7.34 (m, 2H); <sup>13</sup>C NMR (100 MHz, CDCl<sub>3</sub>)  $\delta$  21.5, 22.3, 25.6, 26.5, 28.9, 29.5, 33.4, 39.0, 84.4, 86.4, 120.5, 127.1, 127.9, 128.7, 134.1, 136.1, 205.4.

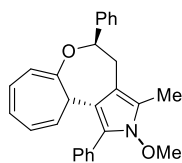

**(5*R*,11*aS*)-2-methoxy-3-methyl-1,5-diphenyl-2,4,5,11*a*-tetrahydrocyclohepta[2,3]oxepino[4,5-*c*]pyrrole (3x)**

Yellow solid, m.p. = 92-94 °C; 24.5 mg, 31% yield; 73% ee;  $[\alpha]_D^{20.0} = -3.6$  (0.1, CH<sub>2</sub>Cl<sub>2</sub>); [Daicel Chiralpak IB-3 (0.45 cm × 25 cm), *n*-hexane/2-propanol = 99/1,  $v = 1.0$  mL•min<sup>-1</sup>,  $\lambda = 254$  nm,  $t$  (major) = 7.6 min,  $t$  (minor) = 8.9 min]; <sup>1</sup>H NMR (400 MHz, CDCl<sub>3</sub>)  $\delta$  2.18 (s, 3H), 3.02 (dd,  $J = 15.2, 4.4$  Hz, 1H), 3.14-3.21 (m, 2H), 3.56 (s, 3H), 5.06 (dd,  $J = 9.7, 4.4$  Hz, 1H), 5.30 (dd,  $J = 9.2, 5.9$  Hz, 1H), 5.68 (d,  $J = 6.3$  Hz, 1H), 6.13-6.20 (m, 1H), 6.35 (dd,  $J = 10.9, 6.4$  Hz, 1H), 6.49 (dd,  $J = 10.9, 5.4$  Hz, 1H), 7.22-7.28 (m, 2H), 7.30-7.35 (m, 6H), 7.39-7.42 (m, 2H); <sup>13</sup>C NMR (100 MHz, CDCl<sub>3</sub>)  $\delta$  8.4, 30.4, 40.5, 65.3, 82.7, 111.1, 112.8, 115.6, 120.9, 124.5, 125.0, 125.8, 126.7, 126.9, 127.7, 127.9, 128.1, 128.2, 128.4, 129.3, 130.7, 141.2, 145.6; HRMS (ESI)  $m/z$  calcd for C<sub>27</sub>H<sub>25</sub>NO<sub>2</sub> [M+H]<sup>+</sup>: 396.1958, found: 396.1955.

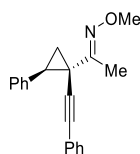



**(E)-1-((1*S*,2*R*)-2-phenyl-1-(phenylethynyl)cyclopropyl)ethan-1-one-O-methyl oxime (1x)**

Yellow oil, 22 mg, 38% yield; 37% ee;  $[\alpha]_{\text{D}}^{20.0} = -41.3$  (0.1, CH<sub>2</sub>Cl<sub>2</sub>); [Daicel Chiralpak IB-3 (0.45 cm × 25 cm), *n*-hexane/2-propanol = 99.5/0.5,  $v = 1.0 \text{ mL} \cdot \text{min}^{-1}$ ,  $\lambda = 254 \text{ nm}$ ,  $t$  (major) = 4.6 min,  $t$  (minor) = 4.9 min]; <sup>1</sup>H NMR (400 MHz, CDCl<sub>3</sub>)  $\delta$  1.67 (dd,  $J = 7.4, 5.1 \text{ Hz}$ , 1H), 2.13 (s, 3H), 2.16 (dd,  $J = 5.5, 3.3 \text{ Hz}$ , 1H), 2.67 (dd,  $J = 8.9, 7.4 \text{ Hz}$ , 1H), 3.87 (s, 3H), 7.03-7.11 (m, 2H), 7.14-7.22 (m, 3H), 7.22 -7.28 (m, 1H) 7.29-7.36 (m, 4H); <sup>13</sup>C NMR (100 MHz, CDCl<sub>3</sub>)  $\delta$  14.0, 21.0, 26.6, 34.4, 61.7, 82.3, 88.7, 123.4, 126.7, 127.7, 127.9, 128.1, 128.6, 131.5, 137.3, 156.0.

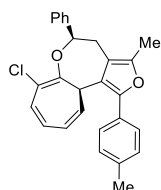

**(5*R*,11*R*)-7-chloro-3-methyl-5-phenyl-1-(*p*-tolyl)-4,5-dihydro-11aH-cyclohepta[b]furo[3,4-d]oxepine (4a)**

White solid, m.p. = 86-88 °C; 28 mg, 34% yield; 88% ee;  $[\alpha]_{\text{D}}^{20.0} = -1.1$  (0.1, CH<sub>2</sub>Cl<sub>2</sub>); [Daicel Chiralpak IA-3 (0.45 cm × 25 cm), *n*-hexane/2-propanol = 97/3,  $v = 1.0 \text{ mL} \cdot \text{min}^{-1}$ ,  $\lambda = 254 \text{ nm}$ ,  $t$  (major) = 5.8 min,  $t$  (minor) = 5.3 min]; <sup>1</sup>H NMR (400 MHz, CDCl<sub>3</sub>)  $\delta$  2.02 (s, 3H), 2.28 (s, 3H), 2.96 (dd,  $J = 15.3, 7.0 \text{ Hz}$ , 1H), 3.07 (dd,  $J = 15.2, 4.7 \text{ Hz}$ , 1H), 3.23 (d,  $J = 6.5 \text{ Hz}$ , 1H), 5.33-5.42 (m, 2H), 6.17-6.25 (m, 1H), 6.48 (d,  $J = 11.2 \text{ Hz}$ , 1H), 6.56 (ddd,  $J = 11.3, 5.2, 1.3 \text{ Hz}$ , 1H), 7.05-7.08 (m, 2H), 7.23-7.26 (m, 7H); <sup>13</sup>C NMR (100 MHz, CDCl<sub>3</sub>)  $\delta$  11.4, 21.3, 30.8, 39.9, 82.2, 116.8, 117.5, 118.9, 124.9, 126.5, 126.8, 127.2, 128.1, 128.2, 128.5, 128.8, 129.0, 129.6, 137.1, 139.9, 140.4, 146.6, 147.9; HRMS (ESI)  $m/z$  calcd for C<sub>27</sub>H<sub>23</sub>ClO<sub>2</sub> [M+H]<sup>+</sup>: 415.1435, found: 415.1434.

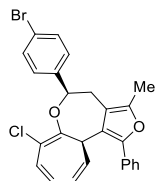

**(5*R*,11*aR*)-5-(4-bromophenyl)-7-chloro-3-methyl-1-phenyl-4,5-dihydro-11*aH*-cyclohepta[b]furo[3,4-d]oxepine (4b)**

White solid, m.p. = 98-100 °C; 30 mg, 31% yield; 94% ee;  $[\alpha]_{\text{D}}^{20.0} = -1.4$  (0.1, CH<sub>2</sub>Cl<sub>2</sub>); [Daicel Chiralpak IC-3 (0.45 cm × 25 cm), *n*-hexane/2-propanol = 97/3,  $\nu = 1.0$  mL•min<sup>-1</sup>,  $\lambda = 254$  nm, t (major) = 4.6 min, t (minor) = 4.9 min]; <sup>1</sup>H NMR (400 MHz, CDCl<sub>3</sub>)  $\delta$  2.09 (s, 3H), 2.97 (dd,  $J = 15.3, 6.7$  Hz, 1H), 3.14 (dd,  $J = 15.3, 4.8$  Hz, 1H), 3.32 (d,  $J = 6.5$  Hz, 1H), 5.37-5.48 (m, 2H), 6.29 (ddd,  $J = 9.1, 5.3, 1.3$  Hz, 1H), 6.56 (d,  $J = 11.2$  Hz, 1H), 6.66 (dd,  $J = 11.2, 5.3$  Hz, 1H), 7.16-7.22 (m, 2H), 7.24-7.28 (m, 1H), 7.35 (t,  $J = 7.6$  Hz, 2H), 7.40-7.48 (m, 4H); <sup>13</sup>C NMR (100 MHz, CDCl<sub>3</sub>)  $\delta$  11.4, 30.7, 39.9, 81.3, 116.6, 117.9, 119.4, 122.1, 125.0, 126.9, 127.0, 127.4, 128.2, 128.3, 129.1, 129.5, 131.2, 131.4, 139.4, 139.5, 147.1, 147.9; HRMS (ESI)  $m/z$  calcd for C<sub>26</sub>H<sub>20</sub>BrClO<sub>2</sub> [M+H]<sup>+</sup>: 479.0408, found: 479.0409.

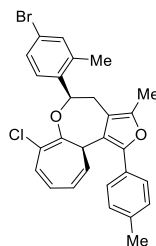

**(5*R*,11*aR*)-5-(4-bromo-2-methylphenyl)-7-chloro-3-methyl-1-phenyl-4,5-dihydro-11*aH*-cyclohepta[b]furo[3,4-d]oxepine (4c)**

White solid, m.p. = 96-98 °C; 35 mg, 35% yield; 90% ee;  $[\alpha]_{\text{D}}^{20.0} = -1.5$  (0.1, CH<sub>2</sub>Cl<sub>2</sub>); [Daicel Chiralpak IC-3 (0.45 cm × 25 cm), *n*-hexane/2-propanol = 97/3,  $\nu = 1.0$  mL•min<sup>-1</sup>,  $\lambda = 254$  nm, t (major) = 5.1 min, t (minor) = 4.9 min]; <sup>1</sup>H NMR (400 MHz, CDCl<sub>3</sub>)  $\delta$  2.01 (s, 3H), 2.27 (s, 3H), 2.33 (s, 3H), 2.89 (dd,  $J = 15.3, 6.8$  Hz, 1H), 2.97 (dd,  $J = 15.2, 4.6$  Hz, 1H), 3.20 (d,  $J = 6.5$  Hz, 1H), 5.37 (dd,  $J = 9.0, 6.5$  Hz, 1H), 5.50

(dd,  $J = 6.8, 4.6$  Hz, 1H), 6.20 (ddd,  $J = 9.0, 5.3, 1.3$  Hz, 1H), 6.46 (d,  $J = 11.2$  Hz, 1H), 6.55 (dd,  $J = 11.2, 5.2$  Hz, 1H), 7.03-7.10 (m, 3H), 7.19 (dd,  $J = 8.3, 2.2$  Hz, 1H), 7.21-7.27 (m, 3H);  $^{13}\text{C}$  NMR (100 MHz,  $\text{CDCl}_3$ )  $\delta$  11.4, 19.2, 21.4, 29.3, 39.9, 78.0, 116.8, 117.4, 118.9, 121.8, 124.9, 126.8, 127.0, 127.4, 128.4, 128.8, 128.9, 129.1, 129.5, 133.0, 137.2, 137.3, 137.4, 139.6, 146.6, 148.1; HRMS (ESI)  $m/z$  calcd for  $\text{C}_{28}\text{H}_{24}\text{BrClO}_2$   $[\text{M}+\text{H}]^+$ : 507.0561, found: 507.0566 .

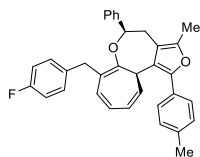

**(5*R*,11*aR*)-7-(4-fluorobenzyl)-3-methyl-5-phenyl-1-(*p*-tolyl)-4,5-dihydro-11*aH*-cyclohepta[b]furo[3,4-d]oxepine (4d)**

White solid, m.p. = 78-80 °C; 35 mg, 36% yield; 83% ee,  $[\alpha]_{\text{D}}^{20.0} = -2.3$  (0.1,  $\text{CH}_2\text{Cl}_2$ ); [Daicel Chiralpak IB-3 (0.45 cm  $\times$  25 cm), *n*-hexane/2-propanol = 97/3,  $v = 1.0$  mL $\cdot$ min $^{-1}$ ,  $\lambda = 254$  nm,  $t$  (major) = 5.1 min,  $t$  (minor) = 6.0 min];  $^1\text{H}$  NMR (400 MHz,  $\text{CDCl}_3$ )  $\delta$  2.16 (s, 3H), 2.25 (s, 3H), 2.83-2.98 (m, 2H), 3.11-3.21 (m, 3H), 5.06 (dd,  $J = 9.8, 3.9$  Hz, 1H), 5.41 (dd,  $J = 8.9, 6.4$  Hz, 1H), 6.18-6.31 (m, 2H), 6.46 (dd,  $J = 11.1, 5.3$  Hz, 1H), 6.64-6.82 (m, 4H), 7.05 (d,  $J = 7.9$  Hz, 2H), 7.18-7.25 (m, 7H);  $^{13}\text{C}$  NMR (100 MHz,  $\text{CDCl}_3$ )  $\delta$  11.6, 21.3, 31.0, 34.8, 40.2, 82.9, 114.8 (d,  $J = 21.0$  Hz), 117.8, 120.5, 122.4, 125.2, 126.2, 126.6, 126.7, 127.6, 128.3, 128.4, 128.7, 129.1, 130.0 (d,  $J = 7.7$  Hz), 132.6, 136.7, 136.8 (d,  $J = 2.2$  Hz), 140.6, 140.8, 146.0, 147.9, 161.2 (d,  $J = 243.0$  Hz); HRMS (ESI)  $m/z$  calcd for  $\text{C}_{34}\text{H}_{29}\text{FO}_2$   $[\text{M}+\text{H}]^+$ : 489.2224, found: 489.2229 .

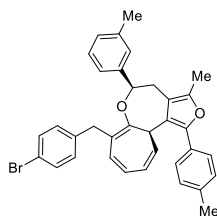

**(5*R*,11*aR*)-7-(4-bromobenzyl)-3-methyl-5-(*m*-tolyl)-1-(*p*-tolyl)-4,5-dihydro-11*aH*-cyclohepta[b]furo[3,4-d]oxepine (4e)**

White solid, m.p. = 86-88 °C; 41 mg, 37% yield; 90% ee,  $[\alpha]_D^{20.0} = -3.3$  (0.1, CH<sub>2</sub>Cl<sub>2</sub>); [Daicel Chiralpak IB-3 (0.45 cm × 25 cm), *n*-hexane/2-propanol = 97/3,  $\nu = 1.0$  mL•min<sup>-1</sup>,  $\lambda = 254$  nm,  $t$  (major) = 5.6 min,  $t$  (minor) = 4.8 min]; <sup>1</sup>H NMR (400 MHz, CDCl<sub>3</sub>)  $\delta$  2.27 (s, 3H), 2.30 (s, 3H), 2.33 (s, 3H), 2.93 (dd,  $J = 15.3, 3.8$  Hz, 1H), 3.05 (d,  $J = 15.0$  Hz, 1H), 3.17-3.27 (m, 3H), 5.08 (dd,  $J = 10.0, 3.7$  Hz, 1H), 5.48 (dd,  $J = 8.9, 6.5$  Hz, 1H), 6.28-6.37 (m, 2H), 6.55 (dd,  $J = 11.1, 5.3$  Hz, 1H), 6.76 (d,  $J = 8.3$  Hz, 2H), 7.08-7.13 (m, 4H), 7.15-7.19 (m, 2H), 7.23-7.26 (m, 2H), 7.29-7.33 (m, 2H); <sup>13</sup>C NMR (100 MHz, CDCl<sub>3</sub>)  $\delta$  11.6, 21.3, 21.5, 31.4, 35.2, 40.3, 83.0, 117.9, 119.3, 120.4, 121.6, 123.6, 125.2, 126.1, 126.7, 127.4, 127.5, 128.3, 128.6, 129.0, 129.1, 130.4, 131.1, 132.7, 136.7, 138.0, 140.3, 140.5, 141.0, 146.0, 147.9; HRMS (ESI)  $m/z$  calcd for C<sub>35</sub>H<sub>31</sub>BrO<sub>2</sub> [M+H]<sup>+</sup>: 562.1608, found: 562.1610.

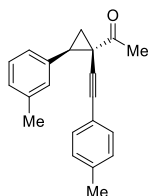

**1-((1*S*,2*R*)-2-(*m*-tolyl)-1-(*p*-tolylolethynyl)cyclopropyl)ethan-1-one (1y)**

<sup>1</sup>H NMR (400 MHz, CDCl<sub>3</sub>)  $\delta$  1.82 (dd,  $J = 8.0, 4.2$  Hz, 1H), 2.18 (dd,  $J = 9.1, 4.2$  Hz, 1H), 2.31 (s, 3H), 2.35 (s, 3H), 2.58 (s, 3H), 2.98 (t,  $J = 8.5$  Hz, 1H), 7.03-7.11 (m, 7H), 7.23 (t,  $J = 7.9$  Hz, 1H); <sup>13</sup>C NMR (100 MHz, CDCl<sub>3</sub>)  $\delta$  21.5, 21.6, 26.6, 29.7, 33.4, 39.3, 84.6, 86.7, 120.0, 125.7, 127.9, 128.0, 129.0, 129.5, 131.3, 135.9, 137.5, 138.1, 205.2.

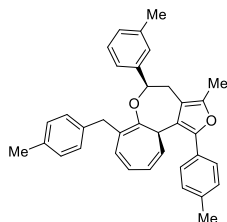

**(5*R*,11*R*)-3-methyl-7-(4-methylbenzyl)-5-(*m*-tolyl)-1-(*p*-tolyl)-4,5-dihydro-11aH-cyclohepta[b]furo[3,4-d]oxepine (4f)**

White solid, m.p. = 96-98 °C; 36 mg, 36% yield; 90% ee;  $[\alpha]_D^{20.0} = -2.6$  (0.1, CH<sub>2</sub>Cl<sub>2</sub>); [Daicel Chiralpak IB-3 (0.45 cm × 25 cm), *n*-hexane/2-propanol = 97/3,  $v = 1.0$  mL•min<sup>-1</sup>,  $\lambda = 254$  nm, t (major) = 4.9 min, t (minor) = 4.5 min]; <sup>1</sup>H NMR (400 MHz, CDCl<sub>3</sub>)  $\delta$  2.24 (s, 3H), 2.25 (s, 3H), 2.30 (s, 3H), 2.32 (s, 3H), 2.97 (dd,  $J = 15.3, 4.2$  Hz, 2H), 3.16-3.23 (m, 1H), 3.24 (d,  $J = 6.4$  Hz, 1H), 3.33 (d,  $J = 14.7$  Hz, 1H), 5.12 (dd,  $J = 9.7, 4.0$  Hz, 1H), 5.48 (dd,  $J = 8.9, 6.4$  Hz, 1H), 6.30 (ddd,  $J = 8.8, 5.3, 1.3$  Hz, 1H), 6.38 (d,  $J = 11.1$  Hz, 1H), 6.53 (dd,  $J = 11.1, 5.3$  Hz, 1H), 6.85 (d,  $J = 7.9$  Hz, 2H), 6.96 (d,  $J = 7.8$  Hz, 2H), 7.07-7.15 (m, 5H), 7.15-7.20 (m, 1H), 7.31 (d,  $J = 8.2$  Hz, 2H); <sup>13</sup>C NMR (100 MHz, CDCl<sub>3</sub>)  $\delta$  11.6, 21.1, 21.3, 21.5, 31.3, 35.1, 40.3, 82.9, 117.9, 120.6, 122.7, 123.7, 125.1, 126.2, 126.5, 127.3, 127.6, 128.2, 128.6, 128.7, 128.8, 128.9, 129.1, 132.8, 135.0, 136.7, 137.9, 138.1, 140.5, 140.6, 146.0, 147.8; HRMS (ESI)  $m/z$  calcd for C<sub>36</sub>H<sub>34</sub>O<sub>2</sub> [M+H]<sup>+</sup>: 499.2632, found: 499.2631.

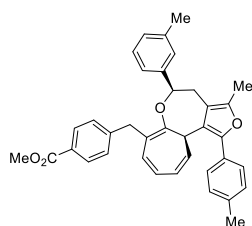

**Methyl-4-(((5*R*,11*R*)-3-methyl-5-(*m*-tolyl)-1-(*p*-tolyl)-4,5-dihydro-11aH-cyclohepta[b]furo[3,4-d]oxepin-7-yl)methyl)benzoate (4g)**

White solid, m.p. = 88-90 °C; 37 mg, 34% yield; 92% ee;  $[\alpha]_D^{20.0} = -5.2$  (0.1, CH<sub>2</sub>Cl<sub>2</sub>); [Daicel Chiralpak IB-3 (0.45 cm × 25 cm), *n*-hexane/2-propanol = 97/3,  $v = 1.0$  mL•min<sup>-1</sup>,  $\lambda = 254$  nm, t (major) = 8.0 min, t (minor) = 7.0 min]; <sup>1</sup>H NMR (400 MHz, CDCl<sub>3</sub>)  $\delta$  2.25 (s, 3H), 2.28 (s, 3H), 2.32 (s, 3H), 2.95 (dd,  $J = 15.4, 3.7$  Hz, 1H), 3.16-3.28 (m, 3H), 3.35 (d,  $J = 15.2$  Hz, 1H), 3.86 (s, 3H), 5.09 (dd,  $J = 9.9, 3.6$  Hz, 1H), 5.48 (dd,  $J = 8.9, 6.5$  Hz, 1H), 6.29-6.40 (m, 2H), 6.55 (dd,  $J = 11.0, 5.3$  Hz, 1H), 6.95 (d,  $J = 8.2$  Hz, 2H), 7.06-7.12 (m, 4H), 7.13-7.17 (m, 2H), 7.30 (d,  $J = 8.2$  Hz, 2H), 7.80 (d,  $J = 8.2$  Hz, 2H); <sup>13</sup>C NMR (100 MHz, CDCl<sub>3</sub>)  $\delta$  11.6, 21.3, 21.5, 31.5, 35.9, 40.3, 52.0, 83.1, 117.9, 120.4, 121.3, 123.6, 125.1, 126.1, 126.7, 127.4, 127.5, 127.6,

128.3, 128.6, 128.7, 129.0, 129.1, 129.4, 132.6, 136.7, 138.0, 140.6, 141.2, 146.0, 147.0, 147.9, 167.3; HRMS (ESI)  $m/z$  calcd for  $C_{37}H_{34}O_4$   $[M+H]^+$ : 543.2530, found: 543.2530.

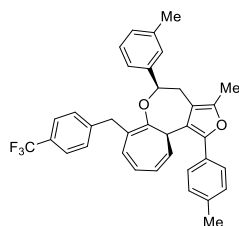

**(5*R*,11*R*)-3-methyl-5-(*m*-tolyl)-1-(*p*-tolyl)-7-(4-(trifluoromethyl)benzyl)-4,5-dihydro-11aH-cyclohepta[b]furo[3,4-d]oxepine (4h)**

White solid, m.p. = 100-102 °C; 41 mg, 37% yield; 90% ee;  $[\alpha]_D^{20.0} = -2.1$  (0.1,  $CH_2Cl_2$ ); [Daicel Chiralpak IB-3 (0.45 cm  $\times$  25 cm), *n*-hexane/2-propanol = 97/3,  $v = 1.0$  mL $\cdot$ min $^{-1}$ ,  $\lambda = 254$  nm,  $t$  (major) = 5.8 min,  $t$  (minor) = 4.6 min];  $^1H$  NMR (400 MHz,  $CDCl_3$ )  $\delta$  2.28 (s, 3H), 2.29 (s, 3H), 2.34 (s, 3H), 2.95 (dd,  $J = 15.3, 3.7$  Hz, 1H), 3.17-3.29 (m, 3H), 3.33 (d,  $J = 15.1$  Hz, 1H), 5.10 (dd,  $J = 10.1, 3.7$  Hz, 1H), 5.51 (dd,  $J = 8.9, 6.4$  Hz, 1H), 6.33-6.42 (m, 2H), 6.58 (dd,  $J = 11.1, 5.3$  Hz, 1H), 6.98 (d,  $J = 7.9$  Hz, 2H), 7.06-7.13 (m, 3H), 7.13-7.18 (m, 3H), 7.32 (d,  $J = 8.2$  Hz, 2H), 7.37 (d,  $J = 8.0$  Hz, 2H);  $^{13}C$  NMR (100 MHz,  $CDCl_3$ )  $\delta$  11.6, 21.3, 21.5, 31.4, 35.7, 40.3, 83.1, 117.9, 120.4, 121.2, 123.1, 123.6, 124.9 (q,  $J = 3.7$  Hz), 125.2, 126.0, 126.7, 124.9 (q,  $J = 209.5$  Hz), 127.4, 127.6, 128.3, 128.6, 128.8, 129.0, 129.1, 132.7, 136.8, 138.0, 140.5, 141.3, 145.5, 146.0, 147.9; HRMS (ESI)  $m/z$  calcd for  $C_{36}H_{31}F_3O_2$   $[M+H]^+$ : 553.2349, found: 553.2347.

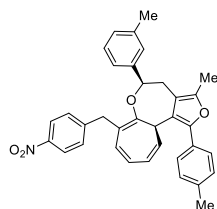

**(5*R*,11*R*)-3-methyl-7-(4-nitrobenzyl)-5-(*m*-tolyl)-1-(*p*-tolyl)-4,5-dihydro-11aH-cyclohepta[b]furo[3,4-d]oxepine (4i)**

White solid, m.p. = 98-100 °C; 34 mg, 32% yield; 95% ee;  $[\alpha]_{\text{D}}^{20.0} = -4.1$  (0.1, CH<sub>2</sub>Cl<sub>2</sub>); [Daicel Chiralpak IB-3 (0.45 cm × 25 cm), *n*-hexane/2-propanol = 97/3,  $\nu = 1.0$  mL•min<sup>-1</sup>,  $\lambda = 254$  nm, t (major) = 10.9 min, t (minor) = 7.4 min]; <sup>1</sup>H NMR (400 MHz, CDCl<sub>3</sub>)  $\delta$  2.28 (s, 3H), 2.29 (s, 3H), 2.34 (s, 3H), 2.94 (dd,  $J = 15.4, 3.5$  Hz, 1H), 3.20-3.29 (m, 2H), 3.32 (s, 2H), 5.09 (dd,  $J = 10.2, 3.5$  Hz, 1H), 5.51 (dd,  $J = 8.9, 6.5$  Hz, 1H), 6.31-6.43 (m, 2H), 6.60 (dd,  $J = 11.0, 5.4$  Hz, 1H), 6.94-7.00 (m, 2H), 7.07-7.20 (m, 6H), 7.30 (d,  $J = 8.2$  Hz, 2H), 7.96 (d,  $J = 8.7$  Hz, 2H); <sup>13</sup>C NMR (100 MHz, CDCl<sub>3</sub>)  $\delta$  11.7, 21.3, 21.5, 31.5, 36.1, 40.3, 83.2, 117.9, 120.2, 120.4, 123.3, 123.5, 125.2, 126.0, 126.9, 127.4, 127.8, 128.4, 128.5, 129.0, 129.1, 129.2, 132.4, 136.8, 138.1, 140.5, 141.7, 146.0, 146.1, 148.0, 149.5; HRMS (ESI)  $m/z$  calcd for C<sub>35</sub>H<sub>31</sub>NO<sub>4</sub> [M+H]<sup>+</sup>: 530.2326, found: 530.2326.

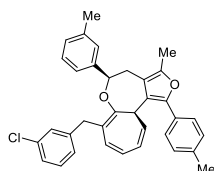

**(5*R*,11*aR*)-7-(3-chlorobenzyl)-3-methyl-5-(*m*-tolyl)-1-(*p*-tolyl)-4,5-dihydro-11*a*H-cyclohepta[*b*]furo[3,4-*d*]oxepine (4j)**

White solid, m.p. = 82-84 °C; 39 mg, 38% yield; 90% ee;  $[\alpha]_{\text{D}}^{20.0} = -1.4$  (0.1, CH<sub>2</sub>Cl<sub>2</sub>); [Daicel Chiralpak IB-3 (0.45 cm × 25 cm), *n*-hexane/2-propanol = 97/3,  $\nu = 1.0$  mL•min<sup>-1</sup>,  $\lambda = 254$  nm, t (major) = 5.6 min, t (minor) = 4.8 min]; <sup>1</sup>H NMR (400 MHz, CDCl<sub>3</sub>)  $\delta$  2.27 (s, 3H), 2.31 (s, 3H), 2.34 (s, 3H), 2.96 (dd,  $J = 15.4, 3.8$  Hz, 1H), 3.07 (d,  $J = 15.0$  Hz, 1H), 3.20-3.23 (m, 3H), 5.10 (dd,  $J = 10.1, 3.7$  Hz, 1H), 5.50 (dd,  $J = 8.9, 6.4$  Hz, 1H), 6.31-6.36 (m, 1H), 6.37 (d,  $J = 11.0$  Hz, 1H), 6.57 (dd,  $J = 11.1, 5.3$  Hz, 1H), 6.80 (td,  $J = 4.6, 1.6$  Hz, 1H), 6.85-6.89 (m, 1H), 7.04- 7.09 (m, 2H), 7.11-7.16 (m, 5H), 7.19-7.27 (m, 2H), 7.30-7.35 (m, 2H); <sup>13</sup>C NMR (100 MHz, CDCl<sub>3</sub>)  $\delta$  11.6, 21.3, 21.5, 31.4, 35.4, 40.3, 83.1, 117.9, 120.5, 121.4, 123.6, 125.2, 125.8, 126.1, 126.7, 126.8, 127.4, 127.5, 128.3, 128.6, 128.7, 129.0, 129.1, 129.3, 132.6, 133.8, 136.7, 138.0, 140.5, 141.1, 143.4, 146.0, 147.9; HRMS (ESI)  $m/z$  calcd for C<sub>35</sub>H<sub>31</sub>ClO<sub>2</sub> [M+H]<sup>+</sup>: 519.1865, found: 519.1861.

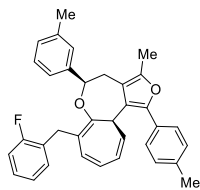

**(5*R*,11*R*)-7-(2-fluorobenzyl)-3-methyl-5-(*m*-tolyl)-1-(*p*-tolyl)-4,5-dihydro-11aH-cyclohepta[b]furo[3,4-d]oxepine (4k)**

White solid, m.p. = 80-82 °C; 35 mg, 35% yield; 92% ee;  $[\alpha]_{\text{D}}^{20.0} = -2.6$  (0.1, CH<sub>2</sub>Cl<sub>2</sub>); [Daicel Chiralpak IB-3 (0.45 cm × 25 cm), *n*-hexane/2-propanol = 97/3,  $\nu = 1.0$  mL•min<sup>-1</sup>,  $\lambda = 254$  nm, t (major) = 6.7 min, t (minor) = 6.3 min]; <sup>1</sup>H NMR (400 MHz, CDCl<sub>3</sub>)  $\delta$  2.16 (s, 3H), 2.21 (s, 3H), 2.24 (s, 3H), 2.90 (dd,  $J = 15.3, 3.8$  Hz, 1H), 3.05-3.16 (m, 3H), 3.28 (d,  $J = 15.3$  Hz, 1H), 5.06 (dd,  $J = 9.6, 3.7$  Hz, 1H), 5.41 (dd,  $J = 8.9, 6.5$  Hz, 1H), 6.21-6.25 (m, 1H), 6.32 (d,  $J = 11.1$  Hz, 1H), 6.48 (dd,  $J = 11.1, 5.3$  Hz, 1H), 6.70-6.77 (m, 1H), 6.78-6.85 (m, 2H), 6.95-7.01 (m, 2H), 7.02-7.10 (m, 5H), 7.23 (d,  $J = 8.2$  Hz, 2H); <sup>13</sup>C NMR (100 MHz, CDCl<sub>3</sub>)  $\delta$  11.6, 21.3, 21.5, 28.2 (d,  $J = 3.6$  Hz), 31.5, 40.4, 82.9, 114.8 (d,  $J = 22.3$  Hz), 117.9, 120.5, 120.8, 123.5, 123.8 (d,  $J = 3.6$  Hz), 125.1, 126.2, 126.6, 127.2 (d,  $J = 7.9$  Hz), 127.3, 127.4, 128.0 (d,  $J = 15.7$  Hz), 128.2, 128.7, 128.8, 129.1, 130.8 (d,  $J = 4.8$  Hz), 132.6, 136.7, 137.9, 140.6, 141.2, 146.0, 147.8, 160.9 (d,  $J = 244.6$  Hz); HRMS (ESI)  $m/z$  calcd for C<sub>35</sub>H<sub>31</sub>FO<sub>2</sub> [M+H]<sup>+</sup>: 503.2381, found: 503.2377.

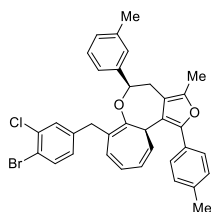

**(5*R*,11*R*)-7-(4-bromo-3-chlorobenzyl)-3-methyl-5-(*m*-tolyl)-1-(*p*-tolyl)-4,5-dihydro-11aH-cyclohepta[b]furo[3,4-d]oxepine (4l)**

White solid, m.p. = 90-92 °C; 45 mg, 38% yield; 89% ee;  $[\alpha]_{\text{D}}^{20.0} = -3.2$  (0.1, CH<sub>2</sub>Cl<sub>2</sub>); [Daicel Chiralpak IB-3 (0.45 cm × 25 cm), *n*-hexane/2-propanol = 97/3,  $\nu = 1.0$  mL•min<sup>-1</sup>,  $\lambda = 254$  nm, t (major) = 7.0 min, t (minor) = 5.2 min]; <sup>1</sup>H NMR (400 MHz,



CDCl<sub>3</sub>) δ 2.20 (s, 3H), 2.23 (s, 3H), 2.26 (s, 3H), 2.85 (dd, *J* = 15.4, 3.6 Hz, 1H), 2.99-3.21(m, 4H), 5.00 (dd, *J* = 10.2, 3.6 Hz, 1H), 5.42 (dd, *J* = 8.9, 6.5 Hz, 1H), 6.22-6.33 (m, 2H), 6.55 (dd, *J* = 8.2, 2.1 Hz, 1H), 6.50 (dd, *J* = 11.1, 5.3 Hz, 1H), 6.84 (d, *J* = 2.1 Hz, 1H), 7.00-7.12 (m, 6H), 7.19-7.27 (m, 3H); <sup>13</sup>C NMR (100 MHz, CDCl<sub>3</sub>) δ 11.7, 21.3, 21.6, 31.4, 35.1, 40.3, 83.2, 117.9, 119.1, 120.3, 120.8, 123.6, 125.2, 126.0, 126.8, 127.4, 127.7, 128.3, 128.4, 128.6, 129.0, 129.1, 130.4, 132.5, 133.1, 133.7, 136.8, 138.1, 140.4, 141.4, 142.5, 146.0, 147.9; HRMS (ESI) *m/z* calcd for C<sub>35</sub>H<sub>30</sub>BrClO<sub>2</sub> [M+H]<sup>+</sup>: 597.1035, found: 597.1039.

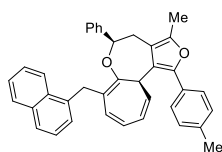

**(5*R*,11*R*)-3-methyl-7-(naphthalen-1-ylmethyl)-5-phenyl-1-(*p*-tolyl)-4,5-dihydro-11aH-cyclohepta[b]furo[3,4-d]oxepine (4m)**

White solid, m.p. = 110-112 °C; 32 mg, 31% yield; 89% ee, [α]<sub>D</sub><sup>20.0</sup> = -4.5 (0.1, CH<sub>2</sub>Cl<sub>2</sub>); [Daicel Chiralpak IB-3 (0.45 cm × 25 cm), *n*-hexane/2-propanol = 97/3, *v* = 1.0 mL•min<sup>-1</sup>, λ = 254 nm, *t* (major) = 6.8 min, *t* (minor) = 6.2 min]; <sup>1</sup>H NMR (400 MHz, CDCl<sub>3</sub>) δ 2.24 (s, 3H), 2.30 (s, 3H), 3.01 (dd, *J* = 15.2, 4.3 Hz, 1H), 3.19-3.37 (m, 3H), 3.84 (d, *J* = 15.7 Hz, 1H), 5.19 (dd, *J* = 9.7, 4.2 Hz, 1H), 5.50 (dd, *J* = 9.0, 6.2 Hz, 1H), 6.25-6.34 (m, 2H), 6.46 (dd, *J* = 11.1, 5.3 Hz, 1H), 7.01 (d, *J* = 6.8 Hz, 1H), 7.11 (d, *J* = 7.9 Hz, 2H), 7.20 (dd, *J* = 5.2, 1.9 Hz, 3H), 7.26-7.34 (m, 5H), 7.35-7.42 (m, 2H), 7.63 (d, *J* = 8.2 Hz, 1H), 7.76 (dd, *J* = 7.8, 1.8 Hz, 1H), 7.80-7.86 (m, 1H); <sup>13</sup>C NMR (100 MHz, CDCl<sub>3</sub>) δ 11.6, 21.3, 30.5, 32.7, 40.2, 82.7, 117.8, 120.7, 122.3, 124.2, 125.3, 125.4, 125.5, 125.7, 126.3, 126.4, 126.6, 126.8, 127.5, 128.2, 128.3, 128.5, 128.7, 129.1, 132.4, 132.5, 133.7, 136.7, 136.8, 140.2, 140.4, 146.1, 147.8; HRMS (ESI) *m/z* calcd for C<sub>38</sub>H<sub>32</sub>O<sub>2</sub> [M+H]<sup>+</sup>: 521.2475, found: 521.2476.

## 4. Large-scale reaction and synthetic transformations

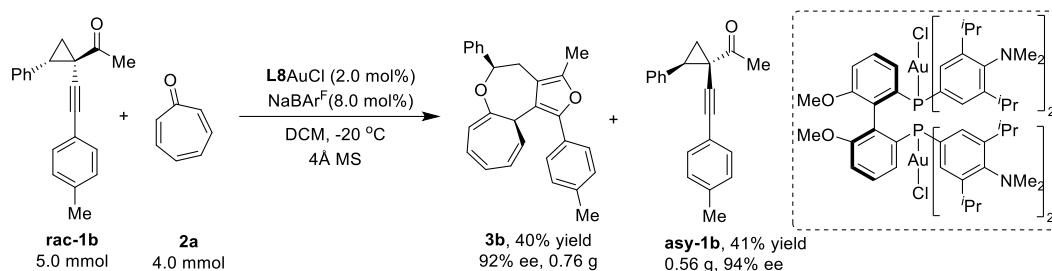

To a dried flask was added **L8AuCl** (2.0 mol%) and **NaBAR<sup>F</sup>** (8.0 mol%) in the glove box, and the DCM (25 mL) was added. Then the mixture was stirred at room temperature for 10 min. Then the solution was transferred into a solution of cyclopropyl ketone **1** (5.0 mmol, 1.0 equiv.) and tropone **2** (4.0 mmol, 0.8 equiv.) with 4 Å molecular sieves 8 g in DCM (25 mL) at -20 °C. The reaction was then stirred at -20 °C for 30 h. After the reaction was monitored by TLC and HPLC analysis. The reaction was filtered by silica gel to remove catalyst rapidly. Then the solvent was removed under reduced pressure, and the residue was purified by a silica gel column using ethyl acetate/petroleum ether (1/80-1/30) as the eluent to give the target product **3b** as white solid (0.76 g, 40% yield, 92% ee) and chiral **1b** as yellow oil (0.56 g, 41% yield, 94% ee). [Daicel Chiralpak IB-3 (0.45 cm × 25 cm), *n*-hexane/2-propanol = 97/3,  $v = 1.0 \text{ mL}\cdot\text{min}^{-1}$ ,  $\lambda = 254 \text{ nm}$ ,  $t$  (major) = 5.1 min,  $t$  (minor) = 5.7 min]; [Daicel Chiralpak IB-3 (0.45 cm × 25 cm), *n*-hexane/2-propanol = 97/3,  $v = 1.0 \text{ mL}\cdot\text{min}^{-1}$ ,  $\lambda = 254 \text{ nm}$ ,  $t$  (major) = 5.0 min,  $t$  (minor) = 5.7 min].

### Synthetic transformations of products

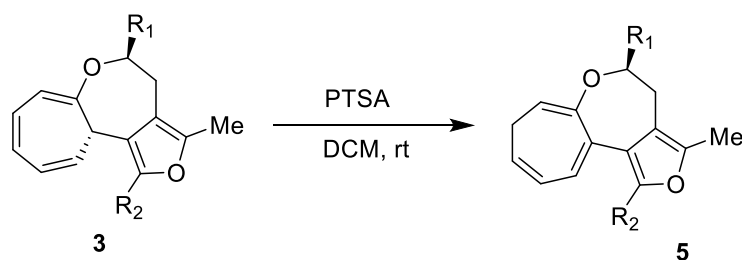

The cycloadduct **3** (0.1 mmol) was added DCM (2.0 mL) and *p*-toluenesulfonic acid (0.2 mmol, 2.0 equiv.). The mixture was stirred at room temperature for 1 h. After the

reaction was monitored by TLC analysis, the reaction was filtered to afford the filtrate. The solvent was removed under reduced pressure. The residue was purified by a silica gel column with ethyl acetate/ petroleum ether (1/60-1/10) to give the desired product

5.

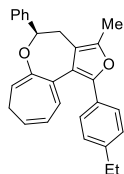

**(R)-1-(4-ethylphenyl)-3-methyl-5-phenyl-4,5-dihydro-8H-cyclohepta[b]furo[3,4-d]oxepine (5a)**

Yellow oil; 26 mg, 65% yield; 88% ee,  $[\alpha]_{\text{D}}^{20.0} = -2.7$  (0.1,  $\text{CH}_2\text{Cl}_2$ ); [Daicel Chiralpak IA-3 (0.45 cm  $\times$  25 cm), *n*-hexane/2-propanol = 97/3,  $v = 1.0 \text{ mL}\cdot\text{min}^{-1}$ ,  $\lambda = 254 \text{ nm}$ ,  $t$  (major) = 5.5 min,  $t$  (minor) = 6.0 min];  $^1\text{H NMR}$  (400 MHz,  $\text{CDCl}_3$ )  $\delta$  1.26 (t,  $J = 7.6 \text{ Hz}$ , 3H), 2.13 (s, 3H), 2.53 (dd,  $J = 13.1, 6.7 \text{ Hz}$ , 1H), 2.66 (q,  $J = 7.7 \text{ Hz}$ , 2H), 2.75 (dd,  $J = 13.1, 7.2 \text{ Hz}$ , 1H), 2.89-2.98 (m, 2H), 5.32 (dd,  $J = 6.5, 4.0 \text{ Hz}$ , 1H), 5.57 (dt,  $J = 8.3, 6.8 \text{ Hz}$ , 1H), 6.22-6.31 (m, 2H), 6.40-6.45 (m, 1H), 7.18 (d,  $J = 8.0 \text{ Hz}$ , 2H), 7.30-7.33 (m, 1H), 7.32-7.39 (m, 4H), 7.43 (d,  $J = 8.2 \text{ Hz}$ , 2H);  $^{13}\text{C NMR}$  (100 MHz,  $\text{CDCl}_3$ )  $\delta$  11.4, 15.5, 28.8, 32.6, 34.9, 84.9, 111.7, 117.6, 119.7, 121.3, 126.2, 126.8, 127.3, 127.4, 127.5, 128.0, 128.5, 129.4, 132.2, 141.9, 143.1, 145.5, 145.7, 145.9; HRMS (ESI)  $m/z$  calcd for  $\text{C}_{28}\text{H}_{26}\text{O}_2$   $[\text{M}+\text{H}]^+$ : 395.2006, found: 395.2001.

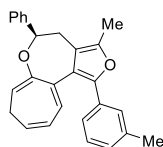

**(R)-3-methyl-5-phenyl-1-(*m*-tolyl)-4,5-dihydro-8H-cyclohepta[b]furo[3,4-d]oxepine (5b)**

Yellow oil; 27 mg, 71% yield; 84% ee,  $[\alpha]_{\text{D}}^{20.0} = -2.2$  (0.1,  $\text{CH}_2\text{Cl}_2$ ); [Daicel Chiralpak IC-3 (0.45 cm  $\times$  25 cm), *n*-hexane/2-propanol = 97/3,  $v = 1.0 \text{ mL}\cdot\text{min}^{-1}$ ,  $\lambda = 254 \text{ nm}$ ,  $t$  (major) = 5.3 min,  $t$  (minor) = 4.1 min];  $^1\text{H NMR}$  (400 MHz,  $\text{CDCl}_3$ )  $\delta$  2.13 (s, 3H), 2.35 (s, 3H), 2.53 (dd,  $J = 13.1, 6.8 \text{ Hz}$ , 1H), 2.75 (dd,  $J = 13.1, 7.2 \text{ Hz}$ , 1H), 2.90-3.01 (m, 2H), 5.33 (dd,  $J = 6.4, 4.0 \text{ Hz}$ , 1H), 5.54-5.62 (m, 1H), 6.23-6.30 (m, 2H), 6.35-6.43

(m, 1H), 7.06 (d,  $J = 7.5$  Hz, 1H), 7.20-7.28 (m, 1H), 7.27-7.34 (m, 3H), 7.32-7.37 (m, 4H);  $^{13}\text{C}$  NMR (100 MHz,  $\text{CDCl}_3$ )  $\delta$  11.4, 21.6, 32.6, 34.8, 84.9, 111.6, 117.8, 120.3, 121.5, 124.4, 126.2, 126.9, 127.4, 127.8, 127.9, 128.0, 128.1, 128.5, 131.7, 132.3, 137.5, 141.9, 145.7, 146.0, 146.1; HRMS (ESI)  $m/z$  calcd for  $\text{C}_{27}\text{H}_{24}\text{O}_2$   $[\text{M}+\text{H}]^+$ : 381.1849, found: 381.1846.

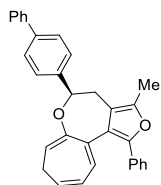

**(R)-5-([1,1'-biphenyl]-4-yl)-3-methyl-1-phenyl-4,5-dihydro-8H-cyclohepta[b]furo[3,4-d]oxepine (5c)**

Yellow oil; 29 mg, 66% yield; 82% ee,  $[\alpha]_{\text{D}}^{20.0} = -5.0$  (0.1,  $\text{CH}_2\text{Cl}_2$ ); [Daicel Chiralpak IA-3 (0.45 cm  $\times$  25 cm), *n*-hexane/2-propanol = 97/3,  $v = 1.0$  mL $\cdot$ min $^{-1}$ ,  $\lambda = 254$  nm,  $t$  (major) = 6.0 min,  $t$  (minor) = 7.7 min];  $^1\text{H}$  NMR (400 MHz,  $\text{CDCl}_3$ )  $\delta$  2.09 (s, 3H), 2.47 (dd,  $J = 13.1, 6.8$  Hz, 1H), 2.70 (dd,  $J = 13.1, 7.2$  Hz, 1H), 2.89-2.93 (m, 2H), 5.30 (dd,  $J = 6.2, 4.2$  Hz, 1H), 5.48-5.55 (m, 1H), 6.16-6.26 (m, 2H), 6.29-6.39 (m, 1H), 7.14-7.22 (m, 2H), 7.26-7.29 (m, 2H), 7.34-7.40 (m, 4H), 7.43-7.47 (m, 2H), 7.50-7.54 (m, 4H);  $^{13}\text{C}$  NMR (100 MHz,  $\text{CDCl}_3$ )  $\delta$  11.5, 32.5, 34.9, 84.7, 111.6, 117.8, 120.4, 121.4, 123.7, 126.6, 126.9, 127.0, 127.1, 127.2, 127.4, 127.5, 128.0, 128.9, 131.9, 132.1, 140.8, 140.9, 141.0, 145.7, 145.9, 146.0; HRMS (ESI)  $m/z$  calcd for  $\text{C}_{32}\text{H}_{26}\text{O}_2$   $[\text{M}+\text{H}]^+$ : 443.2006, found: 443.2007.

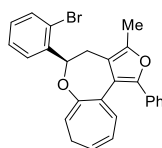

**(R)-5-(2-bromophenyl)-3-methyl-1-phenyl-4,5-dihydro-8H-cyclohepta[b]furo[3,4-d]oxepine (5d)**

Yellow oil; 27 mg, 61% yield; 80% ee,  $[\alpha]_{\text{D}}^{20.0} = -2.2$  (0.1,  $\text{CH}_2\text{Cl}_2$ ); [Daicel Chiralpak IA-3 (0.45 cm  $\times$  25 cm), *n*-hexane/2-propanol = 97/3,  $v = 1.0$  mL $\cdot$ min $^{-1}$ ,  $\lambda = 254$  nm,  $t$  (major) = 5.3 min,  $t$  (minor) = 5.9 min];  $^1\text{H}$  NMR (400 MHz,  $\text{CDCl}_3$ )  $\delta$  2.00 (s, 3H), 2.54 (dd,  $J = 13.2, 6.9$  Hz, 1H), 2.70-2.77 (m, 2H), 2.94 (dd,  $J = 15.2, 3.7$  Hz, 1H), 5.52-

5.59 (m, 1H), 5.60 (dd,  $J = 5.4, 3.6$  Hz, 1H), 6.18-6.27 (m, 2H), 6.32 (d,  $J = 11.0$  Hz, 1H), 7.07 (td,  $J = 7.6, 1.4$  Hz, 1H), 7.14-7.24 (m, 3H), 7.25-7.28 (m, 1H), 7.40 (dd,  $J = 7.9, 1.7$  Hz, 1H), 7.42-7.50 (m, 3H);  $^{13}\text{C}$  NMR (100 MHz,  $\text{CDCl}_3$ )  $\delta$  11.2, 31.4, 34.6, 83.2, 111.7, 117.5, 120.4, 121.3, 121.5, 127.0, 127.2, 127.3, 127.4, 127.5, 127.6, 128.0, 129.1, 131.8, 132.1, 132.7, 140.8, 145.6, 145.7, 146.2; HRMS (ESI)  $m/z$  calcd for  $\text{C}_{26}\text{H}_{21}\text{BrO}_2$   $[\text{M}+\text{H}]^+$ : 445.0668, found: 445.0665.

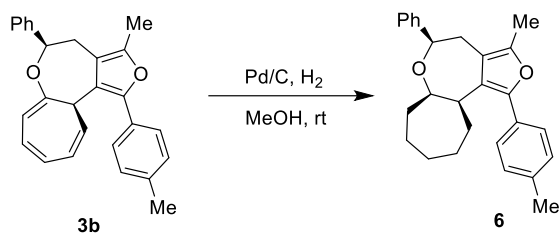

To a stirred solution of **3b** (0.1 mmol) in methanol (2.0 mL), Pd/C (10%, 30 mg) was added and the reaction mixture was stirred at room temperature for 48 h under  $\text{H}_2$  atmosphere. Subsequently, it was filtered to remove Pd/C and the solvent was evaporated in vacuo. The residue was purified by silica gel column with hexanes/ethyl acetate (30:1, v/v) to afford **6** as white solid (32 mg, 82% yield).

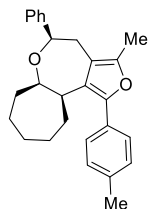

**(5R,6aR,11aR)-3-methyl-5-phenyl-1-(*p*-tolyl)-4,5,6a,8,9,10,11,11a-octahydro-7H-cyclohepta[b]furo[3,4-d]oxepine (**6**)**

White solid, m.p. = 110-112 °C; 32 mg, 82% yield; 91% ee;  $[\alpha]_{\text{D}}^{20.0} = -1.1$  (0.1,  $\text{CH}_2\text{Cl}_2$ ); [Daicel Chiralpak IA-3 (0.45 cm  $\times$  25 cm), *n*-hexane/2-propanol = 97/3,  $v = 1.0$  mL $\cdot$ min $^{-1}$ ,  $\lambda = 254$  nm,  $t$  (major) = 5.5 min,  $t$  (minor) = 6.4 min];  $^1\text{H}$  NMR (400 MHz,  $\text{CDCl}_3$ )  $\delta$  1.27-1.40 (m, 1H), 1.51-1.60 (m, 2H), 1.62-1.75 (m, 2H), 1.75-1.90 (m, 3H), 1.97-2.07 (m, 1H), 2.24 (s, 3H), 2.38 (s, 3H), 2.36-2.41 (m, 1H), 2.75 (d,  $J = 15.2$ , 1H),

2.84-2.94 (m, 1H), 3.03 (dd,  $J = 11.3, 3.2$  Hz, 1H), 3.99 (dd,  $J = 5.2, 2.7$  Hz, 1H), 4.51 (d,  $J = 10.5$  Hz, 1H), 7.21-7.25 (m, 2H), 7.29 (d,  $J = 7.2$  Hz, 1H), 7.34-7.43 (m, 4H), 7.47 (d,  $J = 7.1$  Hz, 2H);  $^{13}\text{C}$  NMR (100 MHz,  $\text{CDCl}_3$ )  $\delta$  11.6, 21.3, 23.0, 26.9, 27.5, 30.2, 35.9, 37.0, 42.7, 83.4, 84.0, 119.3, 125.7, 126.1, 127.1, 127.6, 128.3, 129.1, 129.3, 136.5, 144.7, 145.0, 146.2; HRMS (ESI)  $m/z$  calcd for  $\text{C}_{27}\text{H}_{30}\text{O}_2$   $[\text{M}+\text{H}]^+$ : 387.2322, found: 387.2320.

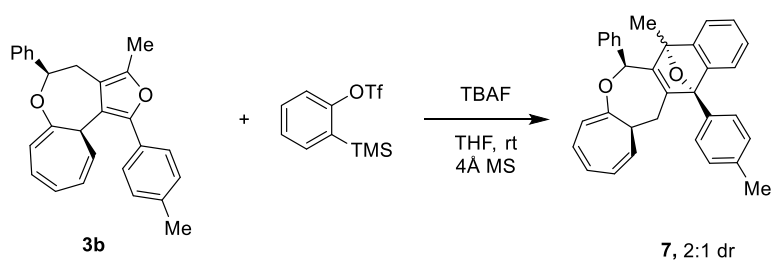

TBAF (0.4 mL, 1 mol/L in THF) was slowly added dropwise to a stirred solution of 4 Å MS (60 mg), chiral product (0.1 mmol) and the triflate (0.5 mmol) in dry THF (1.0 mL) at 0 °C under nitrogen. Then the mixture was stirred at room temperature for 2 h, the solution was quenched with saturated ammonium chloride and extracted with ethyl acetate. The combined organic phase was dried over  $\text{Na}_2\text{SO}_4$  and concentrated in vacuum. The residue was purified by flash chromatography on silica gel with PE/EA=1/30 to afford the aim product 7. (75% yield)

**(7*S*,13*R*,14*aS*)-8-methyl-7-phenyl-13-(*p*-tolyl)-8,13,14,14*a*-tetrahydro-7*H*-8,13-epoxycyclohepta[*b*]naphtho[2,3-*e*]oxepine (7)**

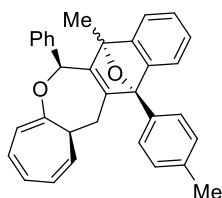

White solid, m.p. = 144-146 °C; 34 mg, 75% yield; 2:1 dr, 82% ee, 89% ee;  $[\alpha]_{\text{D}}^{20.0} = -6.1$  (0.1,  $\text{CH}_2\text{Cl}_2$ ); [Daicel Chiralpak IA-3 (0.45 cm  $\times$  25 cm), *n*-hexane/2-propanol = 97/3,  $v = 1.0$  mL $\cdot$ min $^{-1}$ ,  $\lambda = 254$  nm,  $t$  (major) = 8.5 min, 7.1 min,  $t$  (minor) = 6.0 min,

15.4 min];  $^1\text{H}$  NMR (400 MHz,  $\text{CDCl}_3$ )  $\delta$  1.91 (s, 3H), 1.92 (s, 3H), 2.13-2.19 (m, 1H), 2.33 (s, 3H), 2.37-2.42 (m, 5H), 2.59-2.71 (m, 1H), 2.89-2.97 (m, 1H), 3.13-3.24 (m, 1H), 4.53 (dd,  $J = 8.8, 6.7$  Hz, 1H), 4.73-4.85 (m, 2H), 5.20 (dd,  $J = 10.8, 2.0$  Hz, 1H), 5.65 (dd,  $J = 8.9, 5.4$  Hz, 1H), 5.78 (dd,  $J = 8.1, 6.1$  Hz, 2H), 6.14 (dd,  $J = 8.9, 5.4$  Hz, 1H), 6.36-6.45 (m, 2H), 6.48 (dd,  $J = 10.7, 5.4$  Hz, 2H), 6.96-7.11 (m, 4H), 7.14-7.23 (m, 6H), 7.28-7.31 (m, 3H), 7.32-7.37 (m, 8H), 7.41 (d,  $J = 8.1$  Hz, 2H), 7.59 (d,  $J = 6.6$  Hz, 1H), 7.65 (d,  $J = 8.2$  Hz, 2H);  $^{13}\text{C}$  NMR (100 MHz,  $\text{CDCl}_3$ )  $\delta$  13.9, 14.4, 21.2, 21.3, 36.9, 37.1, 42.7, 43.2, 83.5, 84.1, 88.5, 89.2, 92.6, 93.8, 109.4, 109.5, 117.4, 118.0, 118.2, 119.3, 120.6, 121.8, 123.2, 124.8, 125.0, 125.1, 125.2, 125.7, 125.8, 125.9, 127.0, 127.1, 127.3, 127.6, 127.8, 127.9, 128.0, 128.5, 128.6, 128.9, 129.0, 132.2, 132.8, 137.2, 137.8, 141.3, 141.4, 146.0, 146.4, 147.1, 147.8, 148.5, 148.9, 151.4, 152.1, 152.2, 153.0; HRMS (ESI)  $m/z$  calcd for  $\text{C}_{33}\text{H}_{28}\text{O}_2$   $[\text{M}+\text{H}]^+$ : 457.2162, found: 457.2162.

## 5. X-ray crystallography data

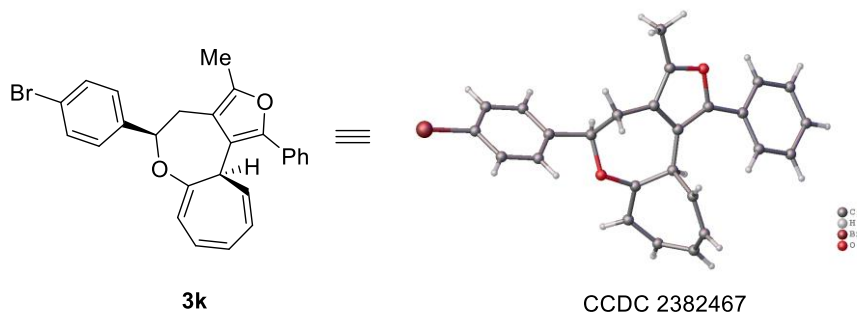

**Table 4 Crystal data and structure refinement for cu\_240112c\_0m.**

|                     |                                          |
|---------------------|------------------------------------------|
| Identification code | cu_240112c_0m                            |
| Empirical formula   | $\text{C}_{26}\text{H}_{21}\text{BrO}_2$ |
| Formula weight      | 445.34                                   |
| Temperature/K       | 293.0                                    |
| Crystal system      | orthorhombic                             |
| Space group         | $\text{P}2_12_12_1$                      |
| $a/\text{\AA}$      | 5.1768(16)                               |

|                                                |                                                                  |
|------------------------------------------------|------------------------------------------------------------------|
| b/Å                                            | 10.008(3)                                                        |
| c/Å                                            | 40.889(11)                                                       |
| $\alpha/^\circ$                                | 90                                                               |
| $\beta/^\circ$                                 | 90                                                               |
| $\gamma/^\circ$                                | 90                                                               |
| Volume/Å <sup>3</sup>                          | 2118.4(11)                                                       |
| Z                                              | 4                                                                |
| $\rho_{\text{calc}}/\text{g}/\text{cm}^3$      | 1.396                                                            |
| $\mu/\text{mm}^{-1}$                           | 2.787                                                            |
| F(000)                                         | 912.0                                                            |
| Crystal size/mm <sup>3</sup>                   | 0.04 × 0.01 × 0.005                                              |
| Radiation                                      | CuK $\alpha$ ( $\lambda = 1.54178$ )                             |
| 2 $\Theta$ range for data collection/ $^\circ$ | 4.322 to 133.188                                                 |
| Index ranges                                   | -5 ≤ h ≤ 6, -11 ≤ k ≤ 11, -47 ≤ l ≤ 48                           |
| Reflections collected                          | 22883                                                            |
| Independent reflections                        | 3688 [ $R_{\text{int}} = 0.0931$ , $R_{\text{sigma}} = 0.0643$ ] |
| Data/restraints/parameters                     | 3688/12/231                                                      |
| Goodness-of-fit on F <sup>2</sup>              | 1.084                                                            |
| Final R indexes [ $I \geq 2\sigma(I)$ ]        | $R_1 = 0.0968$ , $wR_2 = 0.2688$                                 |
| Final R indexes [all data]                     | $R_1 = 0.1395$ , $wR_2 = 0.3017$                                 |
| Largest diff. peak/hole / e Å <sup>-3</sup>    | 0.92/-0.51                                                       |
| Flack parameter                                | 0.095(17)                                                        |

**Table 5 Fractional Atomic Coordinates ( $\times 10^4$ ) and Equivalent Isotropic Displacement Parameters ( $\text{\AA}^2 \times 10^3$ ) for cu\_240112c\_0m.  $U_{\text{eq}}$  is defined as 1/3 of of the trace of the orthogonalised  $U_{\text{IJ}}$  tensor.**

| Atom | x       | y       | z         | U(eq)   |
|------|---------|---------|-----------|---------|
| Br1  | -552(4) | -512(2) | 2516.1(5) | 94.6(9) |



|     |           |          |            |        |
|-----|-----------|----------|------------|--------|
| O2  | 5340(20)  | 2858(9)  | 3753(2)    | 77(3)  |
| C2  | 6320(30)  | 4238(15) | 4701(3)    | 84(5)  |
| C4  | 7020(20)  | 3430(9)  | 4003(3)    | 70(4)  |
| C5  | 9500(30)  | 2593(16) | 4485(3)    | 86(5)  |
| C7  | 8600(30)  | 3457(14) | 4735(3)    | 79(4)  |
| C10 | 7924(19)  | 7134(8)  | 3889(2)    | 74(4)  |
| C18 | 6680(20)  | 5870(7)  | 3875(2)    | 63(3)  |
| C13 | 5016(19)  | 5867(7)  | 3599(2)    | 71(4)  |
| C21 | 5230(20)  | 7128(8)  | 3442(2)    | 81(5)  |
| O1  | 7030(18)  | 7911(6)  | 3621(2)    | 74(3)  |
| C11 | 13080(20) | 9473(10) | 4177(3)    | 102(6) |
| C25 | 13400(20) | 9071(11) | 4499(3)    | 103(7) |
| C9  | 11910(20) | 8039(13) | 4625(2)    | 90(5)  |
| C3  | 10090(20) | 7408(11) | 4429(2)    | 88(5)  |
| C12 | 9766(18)  | 7809(9)  | 4106(2)    | 71(4)  |
| C19 | 11260(20) | 8842(10) | 3980(2)    | 87(5)  |
| C14 | 4990(30)  | 3521(11) | 3438(2)    | 67(4)  |
| C15 | 3510(20)  | 4757(8)  | 3467(4)    | 78(4)  |
| C16 | 3715(17)  | 2476(9)  | 3209.5(19) | 68(4)  |
| C1  | 4568(16)  | 2307(10) | 2890(2)    | 72(4)  |
| C17 | 3290(20)  | 1425(11) | 2682.6(16) | 80(4)  |
| C6  | 1167(19)  | 713(9)   | 2795(2)    | 73(4)  |
| C8  | 315(16)   | 882(9)   | 3115(2)    | 71(4)  |
| C24 | 1589(18)  | 1764(10) | 3322.0(17) | 72(4)  |
| C20 | 5580(30)  | 4820(14) | 4399(2)    | 76(4)  |
| C22 | 7090(30)  | 4784(7)  | 4108(2)    | 61(3)  |
| C23 | 4090(50)  | 7821(17) | 3150(4)    | 106(6) |
| C26 | 8350(30)  | 2401(13) | 4173(3)    | 78(4)  |

**Table 6 Anisotropic Displacement Parameters ( $\text{\AA}^2 \times 10^3$ ) for cu\_240112c\_0m. The Anisotropic displacement factor exponent takes the form:  $2\pi^2[h^2a^*U_{11}+2hka^*b^*U_{12}+\dots]$ .**

| Atom | U <sub>11</sub> | U <sub>22</sub> | U <sub>33</sub> | U <sub>23</sub> | U <sub>13</sub> | U <sub>12</sub> |
|------|-----------------|-----------------|-----------------|-----------------|-----------------|-----------------|
| Br1  | 100.8(14)       | 90.8(13)        | 92.2(13)        | -19.7(10)       | -19.5(12)       | 2.1(9)          |
| O2   | 88(7)           | 68(6)           | 75(6)           | 12(5)           | -27(5)          | -7(6)           |
| C2   | 100(12)         | 84(10)          | 67(9)           | 20(8)           | 13(8)           | -3(10)          |
| C4   | 63(9)           | 77(9)           | 71(9)           | 6(7)            | -1(7)           | 11(8)           |
| C5   | 80(11)          | 95(11)          | 83(10)          | 9(9)            | -4(9)           | -19(10)         |
| C7   | 85(11)          | 86(10)          | 68(9)           | 16(8)           | -15(8)          | -4(9)           |
| C10  | 79(10)          | 69(9)           | 75(9)           | 4(8)            | -7(8)           | 1(8)            |
| C18  | 68(8)           | 57(8)           | 65(8)           | 1(6)            | 4(7)            | 5(7)            |
| C13  | 75(10)          | 55(8)           | 83(9)           | -3(7)           | -15(7)          | 3(7)            |
| C21  | 91(12)          | 71(9)           | 82(10)          | 19(8)           | -13(9)          | 19(9)           |
| O1   | 92(7)           | 58(5)           | 71(6)           | 2(5)            | 2(5)            | 14(5)           |
| C11  | 111(15)         | 75(11)          | 120(14)         | -8(11)          | 20(12)          | -50(12)         |
| C25  | 77(11)          | 69(10)          | 160(20)         | -37(12)         | 1(13)           | -4(9)           |
| C9   | 88(12)          | 102(12)         | 80(10)          | -18(10)         | -6(9)           | 11(11)          |
| C3   | 82(13)          | 93(11)          | 88(11)          | 0(9)            | -4(9)           | -7(10)          |
| C12  | 74(10)          | 63(8)           | 77(9)           | 7(7)            | 16(7)           | 9(7)            |
| C19  | 100(13)         | 68(9)           | 94(11)          | -3(9)           | 16(10)          | -4(9)           |
| C14  | 68(10)          | 67(8)           | 65(8)           | 1(6)            | -11(6)          | 1(7)            |
| C15  | 79(10)          | 70(9)           | 86(10)          | 10(8)           | -18(8)          | 5(8)            |
| C16  | 61(9)           | 79(9)           | 65(8)           | -1(7)           | 1(7)            | 2(7)            |
| C1   | 70(9)           | 81(9)           | 64(8)           | 4(7)            | -1(7)           | -8(8)           |
| C17  | 85(11)          | 78(10)          | 78(9)           | -2(8)           | -13(9)          | 8(9)            |
| C6   | 86(11)          | 68(9)           | 67(8)           | -6(7)           | -5(7)           | 12(8)           |
| C8   | 73(9)           | 64(8)           | 76(9)           | -6(7)           | -7(7)           | -2(7)           |

|     |         |        |        |        |         |        |
|-----|---------|--------|--------|--------|---------|--------|
| C24 | 79(10)  | 71(9)  | 65(8)  | 5(7)   | -1(7)   | -17(8) |
| C20 | 72(9)   | 78(9)  | 79(9)  | -2(7)  | 13(8)   | 5(8)   |
| C22 | 68(8)   | 55(8)  | 61(7)  | 10(6)  | 3(6)    | -3(6)  |
| C23 | 159(17) | 81(11) | 77(10) | -2(9)  | -12(12) | 50(13) |
| C26 | 78(10)  | 76(10) | 80(10) | -12(8) | -11(8)  | 7(8)   |

**Table 7 Bond Lengths for cu\_240112c\_0m.**

| Atom | Atom | Length/Å  | Atom | Atom | Length/Å  |
|------|------|-----------|------|------|-----------|
| Br1  | C6   | 1.896(6)  | C21  | C23  | 1.502(17) |
| O2   | C4   | 1.460(3)  | C11  | C25  | 1.3900    |
| O2   | C14  | 1.460(3)  | C11  | C19  | 1.3900    |
| C2   | C7   | 1.419(3)  | C25  | C9   | 1.3900    |
| C2   | C20  | 1.420(3)  | C9   | C3   | 1.3900    |
| C4   | C22  | 1.422(3)  | C3   | C12  | 1.3900    |
| C4   | C26  | 1.419(3)  | C12  | C19  | 1.3900    |
| C5   | C7   | 1.419(3)  | C14  | C15  | 1.461(3)  |
| C5   | C26  | 1.420(3)  | C14  | C16  | 1.549(14) |
| C10  | C18  | 1.4200    | C16  | C1   | 1.3900    |
| C10  | O1   | 1.4200    | C16  | C24  | 1.3900    |
| C10  | C12  | 1.469(10) | C1   | C17  | 1.3900    |
| C18  | C13  | 1.4200    | C17  | C6   | 1.3900    |
| C18  | C22  | 1.462(3)  | C6   | C8   | 1.3900    |
| C13  | C21  | 1.4200    | C8   | C24  | 1.3900    |
| C13  | C15  | 1.460(3)  | C20  | C22  | 1.421(3)  |
| C21  | O1   | 1.4200    |      |      |           |

**Table 8 Bond Angles for cu\_240112c\_0m.**

| Atom | Atom | Atom | Angle/°   | Atom | Atom | Atom | Angle/°   |
|------|------|------|-----------|------|------|------|-----------|
| C4   | O2   | C14  | 121.0(9)  | C3   | C12  | C10  | 121.4(7)  |
| C7   | C2   | C20  | 122.3(13) | C3   | C12  | C19  | 120.0     |
| C22  | C4   | O2   | 126.8(10) | C19  | C12  | C10  | 118.6(7)  |
| C26  | C4   | O2   | 110.3(8)  | C12  | C19  | C11  | 120.0     |
| C26  | C4   | C22  | 122.2(9)  | O2   | C14  | C15  | 112.2(10) |
| C7   | C5   | C26  | 126.1(15) | O2   | C14  | C16  | 106.2(8)  |
| C5   | C7   | C2   | 122.7(15) | C15  | C14  | C16  | 113.3(9)  |
| C18  | C10  | C12  | 136.8(7)  | C13  | C15  | C14  | 113.1(10) |
| O1   | C10  | C18  | 108.0     | C1   | C16  | C14  | 120.9(7)  |
| O1   | C10  | C12  | 115.2(7)  | C1   | C16  | C24  | 120.0     |
| C10  | C18  | C22  | 124.8(8)  | C24  | C16  | C14  | 119.0(7)  |
| C13  | C18  | C10  | 108.0     | C16  | C1   | C17  | 120.0     |
| C13  | C18  | C22  | 127.2(8)  | C6   | C17  | C1   | 120.0     |
| C18  | C13  | C21  | 108.0     | C17  | C6   | Br1  | 120.3(5)  |
| C18  | C13  | C15  | 128.3(8)  | C17  | C6   | C8   | 120.0     |
| C21  | C13  | C15  | 123.5(8)  | C8   | C6   | Br1  | 119.7(5)  |
| C13  | C21  | C23  | 137.6(11) | C24  | C8   | C6   | 120.0     |
| O1   | C21  | C13  | 108.0     | C8   | C24  | C16  | 120.0     |
| O1   | C21  | C23  | 114.4(11) | C2   | C20  | C22  | 124.7(11) |
| C10  | O1   | C21  | 108.0     | C4   | C22  | C18  | 120.5(9)  |
| C25  | C11  | C19  | 120.0     | C20  | C22  | C4   | 105.3(11) |
| C11  | C25  | C9   | 120.0     | C20  | C22  | C18  | 116.6(9)  |
| C3   | C9   | C25  | 120.0     | C4   | C26  | C5   | 123.0(13) |
| C12  | C3   | C9   | 120.0     |      |      |      |           |

**Table 9 Torsion Angles for cu\_240112c\_0m.**

| <b>A</b> | <b>B</b> | <b>C</b> | <b>D</b> | <b>Angle/°</b> | <b>A</b> | <b>B</b> | <b>C</b> | <b>D</b> | <b>Angle/°</b> |
|----------|----------|----------|----------|----------------|----------|----------|----------|----------|----------------|
| Br1      | C6       | C8       | C24      | 179.1(7)       | C25      | C11      | C19      | C12      | 0.0            |
| O2       | C4       | C22      | C18      | -36(2)         | C25      | C9       | C3       | C12      | 0.0            |
| O2       | C4       | C22      | C20      | 98.3(14)       | C9       | C3       | C12      | C10      | 177.9(9)       |
| O2       | C4       | C26      | C5       | -161.0(15)     | C9       | C3       | C12      | C19      | 0.0            |
| O2       | C14      | C15      | C13      | 76.7(15)       | C3       | C12      | C19      | C11      | 0.0            |
| O2       | C14      | C16      | C1       | -135.9(9)      | C12      | C10      | C18      | C13      | 178.1(14)      |
| O2       | C14      | C16      | C24      | 48.1(11)       | C12      | C10      | C18      | C22      | -2.0(14)       |
| C2       | C20      | C22      | C4       | 70.0(18)       | C12      | C10      | O1       | C21      | -178.6(10)     |
| C2       | C20      | C22      | C18      | -153.5(14)     | C19      | C11      | C25      | C9       | 0.0            |
| C4       | O2       | C14      | C15      | -70.1(14)      | C14      | O2       | C4       | C22      | 46.6(19)       |
| C4       | O2       | C14      | C16      | 165.6(10)      | C14      | O2       | C4       | C26      | -143.1(13)     |
| C7       | C2       | C20      | C22      | -5(3)          | C14      | C16      | C1       | C17      | -176.0(9)      |
| C7       | C5       | C26      | C4       | 33(3)          | C14      | C16      | C24      | C8       | 176.0(9)       |
| C10      | C18      | C13      | C21      | 0.0            | C15      | C13      | C21      | O1       | -174.5(12)     |
| C10      | C18      | C13      | C15      | 174.1(13)      | C15      | C13      | C21      | C23      | 6.0(18)        |
| C10      | C18      | C22      | C4       | -145.3(11)     | C15      | C14      | C16      | C1       | 100.5(11)      |
| C10      | C18      | C22      | C20      | 85.2(14)       | C15      | C14      | C16      | C24      | -75.6(11)      |
| C10      | C12      | C19      | C11      | -177.9(9)      | C16      | C14      | C15      | C13      | -163.0(10)     |
| C18      | C10      | O1       | C21      | 0.0            | C16      | C1       | C17      | C6       | 0.0            |
| C18      | C10      | C12      | C3       | -21.6(14)      | C1       | C16      | C24      | C8       | 0.0            |
| C18      | C10      | C12      | C19      | 156.3(9)       | C1       | C17      | C6       | Br1      | -179.1(7)      |
| C18      | C13      | C21      | O1       | 0.0            | C1       | C17      | C6       | C8       | 0.0            |
| C18      | C13      | C21      | C23      | -179.5(18)     | C17      | C6       | C8       | C24      | 0.0            |
| C18      | C13      | C15      | C14      | -46.7(18)      | C6       | C8       | C24      | C16      | 0.0            |
| C13      | C18      | C22      | C4       | 34.7(18)       | C24      | C16      | C1       | C17      | 0.0            |
| C13      | C18      | C22      | C20      | -94.9(13)      | C20      | C2       | C7       | C5       | -36(2)         |
| C13      | C21      | O1       | C10      | 0.0            | C22      | C4       | C26      | C5       | 10(3)          |
| C21      | C13      | C15      | C14      | 126.6(10)      | C22      | C18      | C13      | C21      | -179.9(12)     |

O1 C10 C18 C13 0.0 C22 C18 C13 C15 -5.8(17)  
O1 C10 C18 C22 179.9(12) C23 C21 O1 C10 179.6(13)  
O1 C10 C12 C3 156.4(7) C26 C4 C22 C18 154.6(14)  
O1 C10 C12 C19 -25.7(11) C26 C4 C22 C20 -71.0(17)  
C11 C25 C9 C3 0.0 C26 C5 C7 C2 1(3)

**Table 10 Hydrogen Atom Coordinates ( $\text{\AA}\times 10^4$ ) and Isotropic Displacement Parameters ( $\text{\AA}^2\times 10^3$ ) for cu\_240112c\_0m.**

| Atom | x        | y        | z       | U(eq) |
|------|----------|----------|---------|-------|
| H2   | 5285.2   | 4373.41  | 4883.62 | 101   |
| H5   | 10994.58 | 2106.51  | 4528.77 | 103   |
| H7   | 9532.94  | 3514.94  | 4928.36 | 95    |
| H11  | 14078.75 | 10163.42 | 4092.12 | 122   |
| H25  | 14620.84 | 9493.15  | 4630.92 | 123   |
| H9   | 12126.86 | 7769.87  | 4841.47 | 108   |
| H3   | 9090.79  | 6716.85  | 4513.21 | 105   |
| H19  | 11042.63 | 9110.38  | 3763.87 | 105   |
| H14  | 6700.25  | 3740.1   | 3349.51 | 80    |
| H15A | 2858.61  | 5004.12  | 3252.69 | 94    |
| H15B | 2033.18  | 4600     | 3607.9  | 94    |
| H1   | 5990.59  | 2784.14  | 2814.59 | 86    |
| H17  | 3863.88  | 1312.23  | 2468.69 | 96    |
| H8   | -1108.02 | 404.92   | 3189.96 | 85    |
| H24  | 1018.65  | 1876.83  | 3535.86 | 86    |
| H20  | 3995.64  | 5254.86  | 4390.07 | 92    |
| H22  | 8864.88  | 4914.66  | 4184.66 | 74    |
| H23A | 4280.98  | 8769.56  | 3174.41 | 159   |
| H23B | 2290.95  | 7601.04  | 3132.96 | 159   |

|      |         |         |         |     |
|------|---------|---------|---------|-----|
| H23C | 4972.03 | 7534.36 | 2955.46 | 159 |
| H26  | 8463.15 | 1562.69 | 4076.21 | 94  |

## Experimental

Single crystals of C<sub>26</sub>H<sub>21</sub>BrO<sub>2</sub> [cu\_240112c\_0m] were from DCM and hexane. A suitable crystal was selected and put on a diffractometer. The crystal was kept at 293.0 K during data collection. Using Olex2 [1], the structure was solved with the olex2.solve [2] structure solution program using Charge Flipping and refined with the olex2.refine [3] refinement package using Gauss-Newton minimisation.

1. Dolomanov, O.V., Bourhis, L.J., Gildea, R.J., Howard, J.A.K. & Puschmann, H. (2009), *J. Appl. Cryst.* 42, 339-341.
2. Bourhis, L.J., Dolomanov, O.V., Gildea, R.J., Howard, J.A.K., Puschmann, H. (2015). *Acta Cryst.* A71, 59-75.
3. Bourhis, L.J., Dolomanov, O.V., Gildea, R.J., Howard, J.A.K., Puschmann, H. (2015). *Acta Cryst.* A71, 59-75.

## Crystal structure determination of [cu\_240112c\_0m]

**Crystal Data** for C<sub>26</sub>H<sub>21</sub>BrO<sub>2</sub> ( $M = 445.34$  g/mol): orthorhombic, space group P2<sub>1</sub>2<sub>1</sub>2<sub>1</sub> (no. 19),  $a = 5.1768(16)$  Å,  $b = 10.008(3)$  Å,  $c = 40.889(11)$  Å,  $V = 2118.4(11)$  Å<sup>3</sup>,  $Z = 4$ ,  $T = 293.0$  K,  $\mu(\text{CuK}\alpha) = 2.787$  mm<sup>-1</sup>,  $D_{\text{calc}} = 1.396$  g/cm<sup>3</sup>, 22883 reflections measured ( $4.322^\circ \leq 2\Theta \leq 133.188^\circ$ ), 3688 unique ( $R_{\text{int}} = 0.0931$ ,  $R_{\text{sigma}} = 0.0643$ ) which were used in all calculations. The final  $R_1$  was 0.0968 ( $I > 2\sigma(I)$ ) and  $wR_2$  was 0.3017 (all data).

## 6. References

1. Zhang, G.; Huang, X.; Li, G.; Zhang, L. Au-Containing All-Carbon 1,4-Dipoles: Generation and [4+2] Annulation in the Formation of Carbo-/Heterocycles. *J. Am. Chem. Soc.* **2008**, *130*, 1814-1815.
2. Bai, Y.; Fang, J.; Ren, J.; Wan, Z. Highly Diastereoselective Gold- or Copper-Catalyzed Formal [4+3] Cycloaddition of 1-(1-Alkynyl) Cyclopropyl Ketones and Nitrones. *Chem. Eur. J.* **2009**, *15*, 8975-8978.
3. Zhang, Y.; Zhang, J. Kinetic resolution of 1-(1-alkynyl)cyclopropyl ketones by gold(I)-catalyzed asymmetric [4+3]cycloaddition with nitrones: scope, mechanism and applications. *Chem. Commun.*, **2012**, *48*, 4710-4712.
4. Wang, Y.; Wu, Q. -Q.; Tian, S. -K. Access to 2-Alkyltropones via Organic Base-Catalyzed Tandem Deamination and Aldol Condensation of Tropinone-Derived Quaternary Ammonium Salts. *J. Org. Chem.* **2023**, *88*, 16456-16466.



# 7. NMR spectra

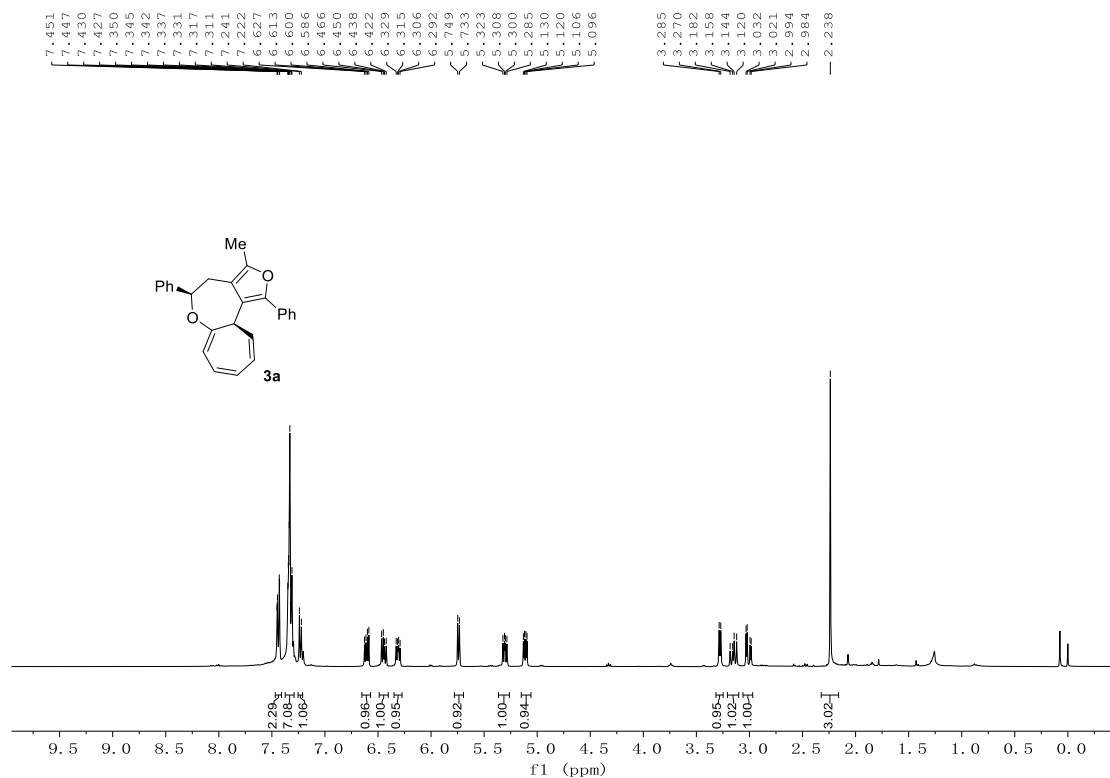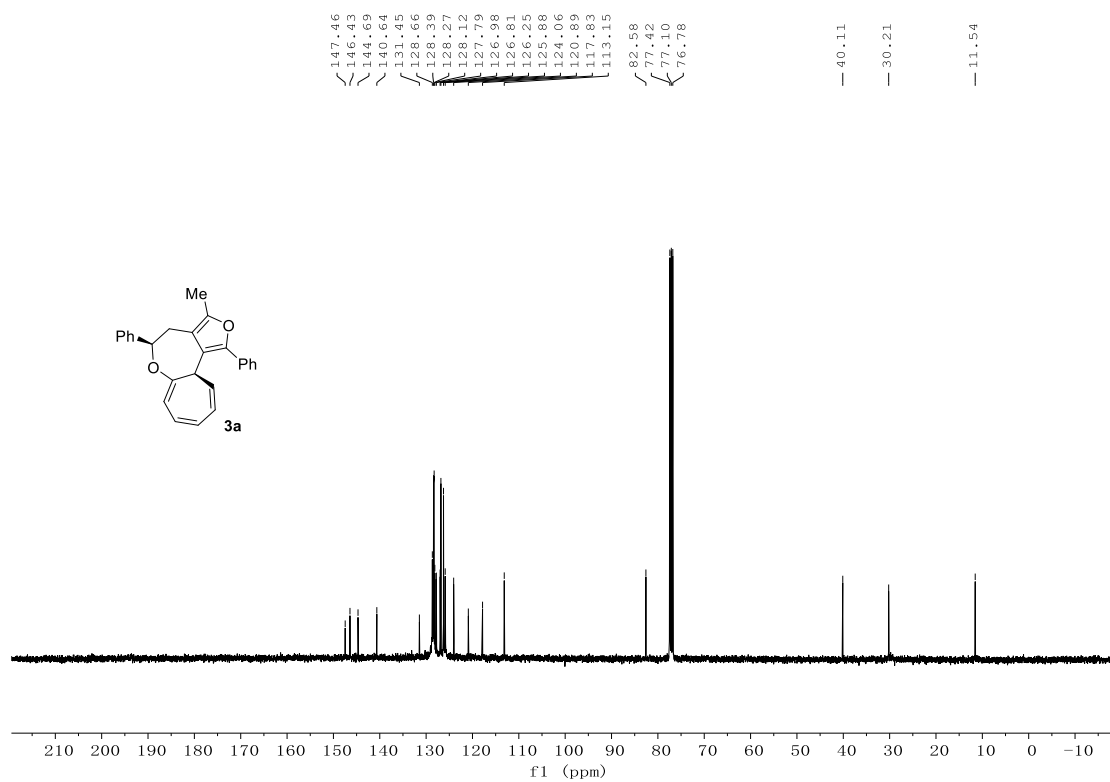

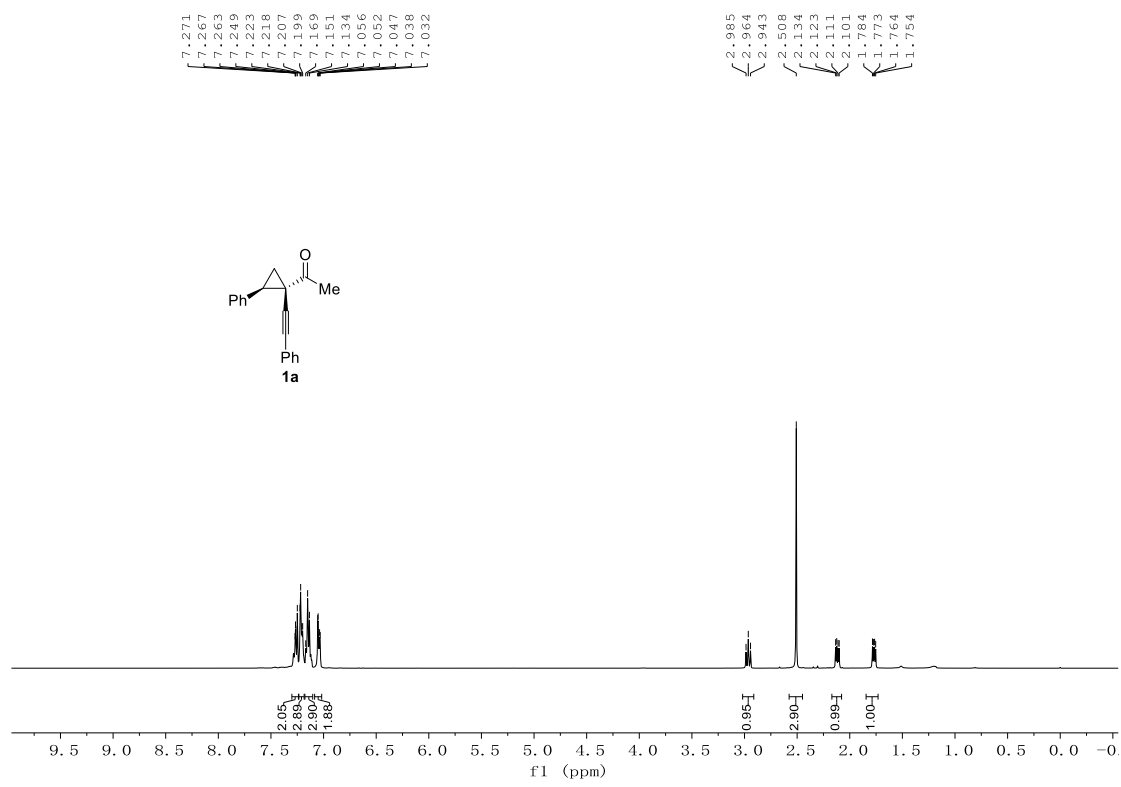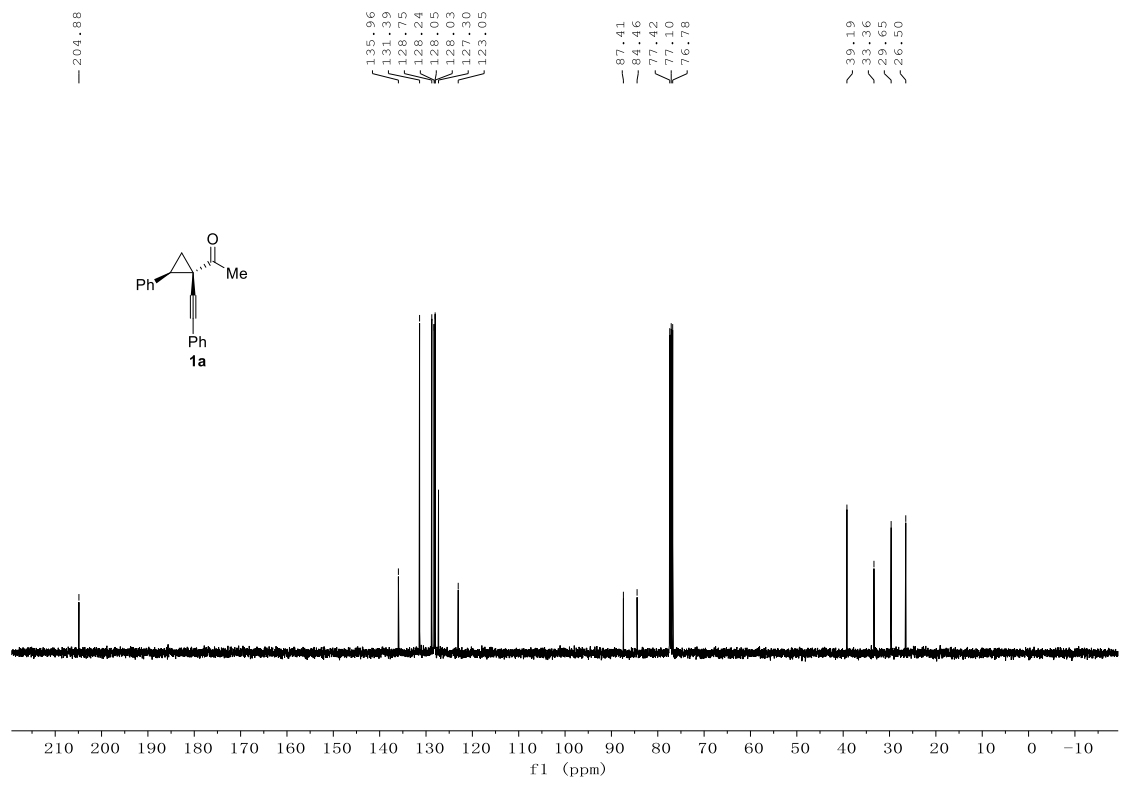

7.274  
7.269  
7.263  
7.258  
7.247  
7.082  
7.062  
6.551  
6.537  
6.524  
6.510  
6.395  
6.379  
6.368  
6.352  
6.247  
6.233  
6.224  
6.211  
5.682  
5.666  
5.249  
5.233  
5.226  
5.211  
5.063  
5.052  
5.039  
5.029

3.175  
3.160  
3.100  
3.077  
3.062  
3.039  
2.862  
2.851  
2.824  
2.813  
2.266  
2.157

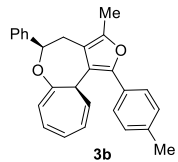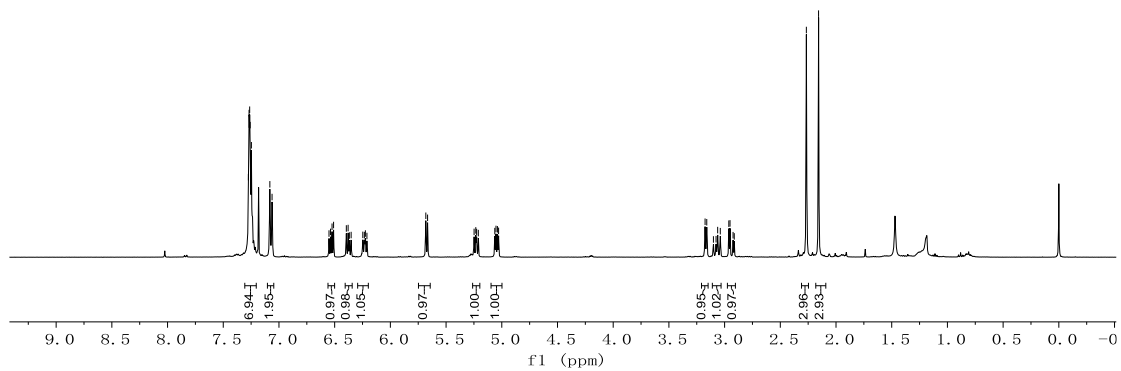

147.68  
146.05  
144.82  
140.73  
136.77  
129.10  
128.70  
128.64  
128.27  
128.09  
127.75  
126.79  
126.23  
125.76  
124.22  
120.19  
117.70  
112.98

82.67  
77.42  
77.10  
76.78

40.15  
30.36  
21.31  
11.53

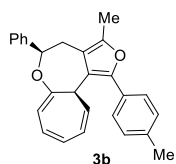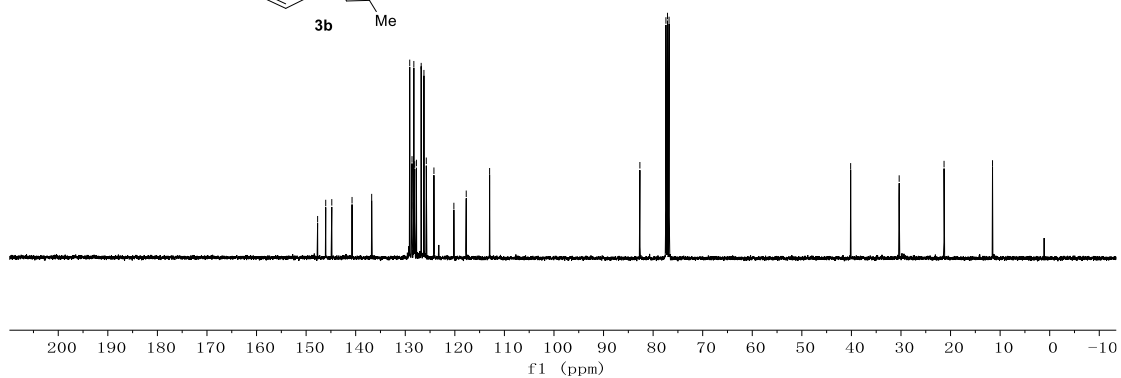

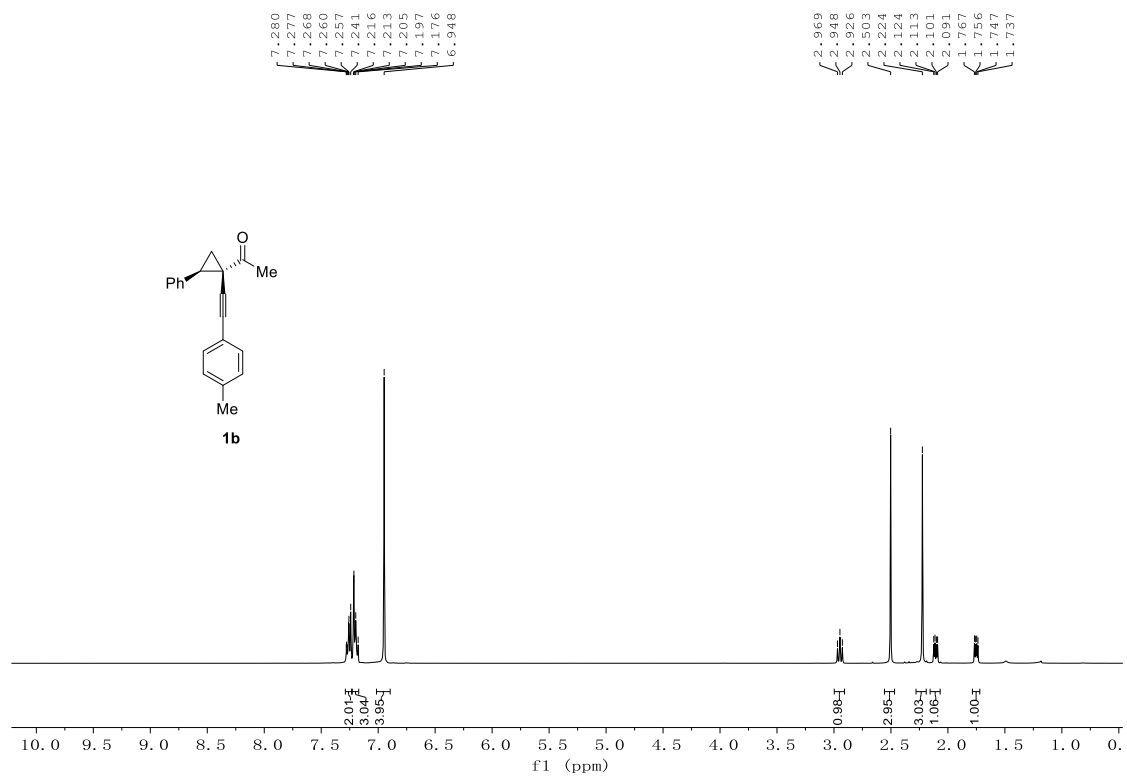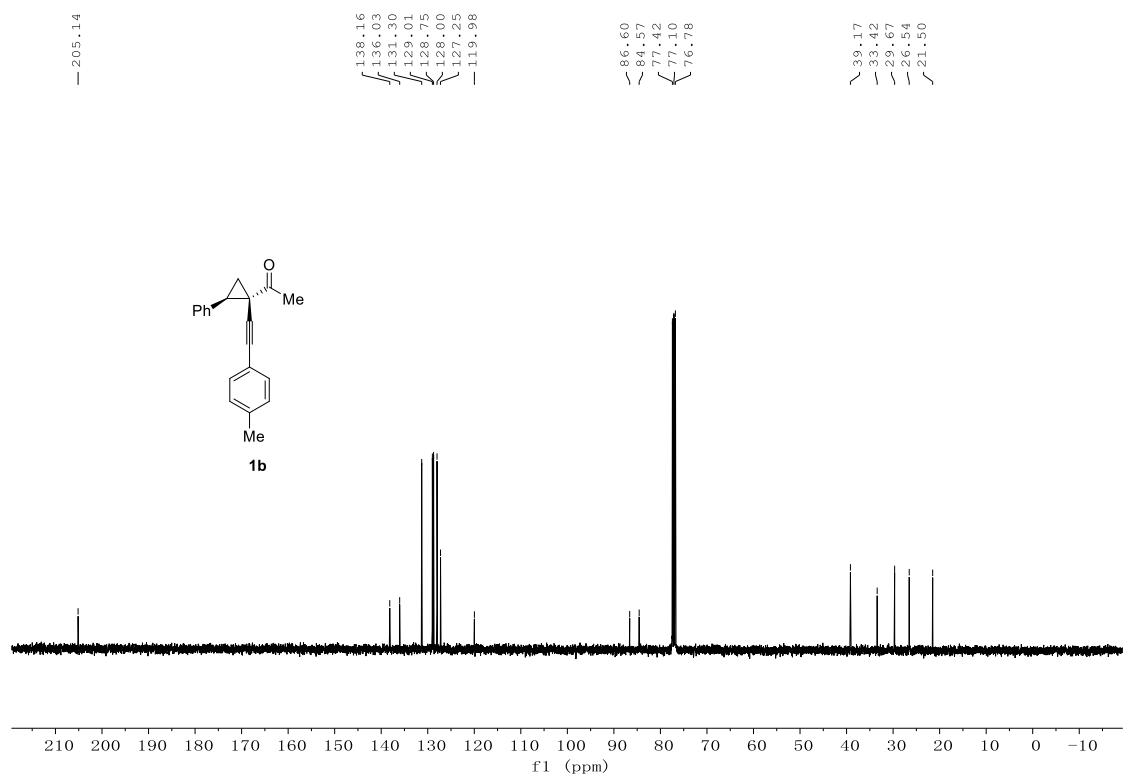

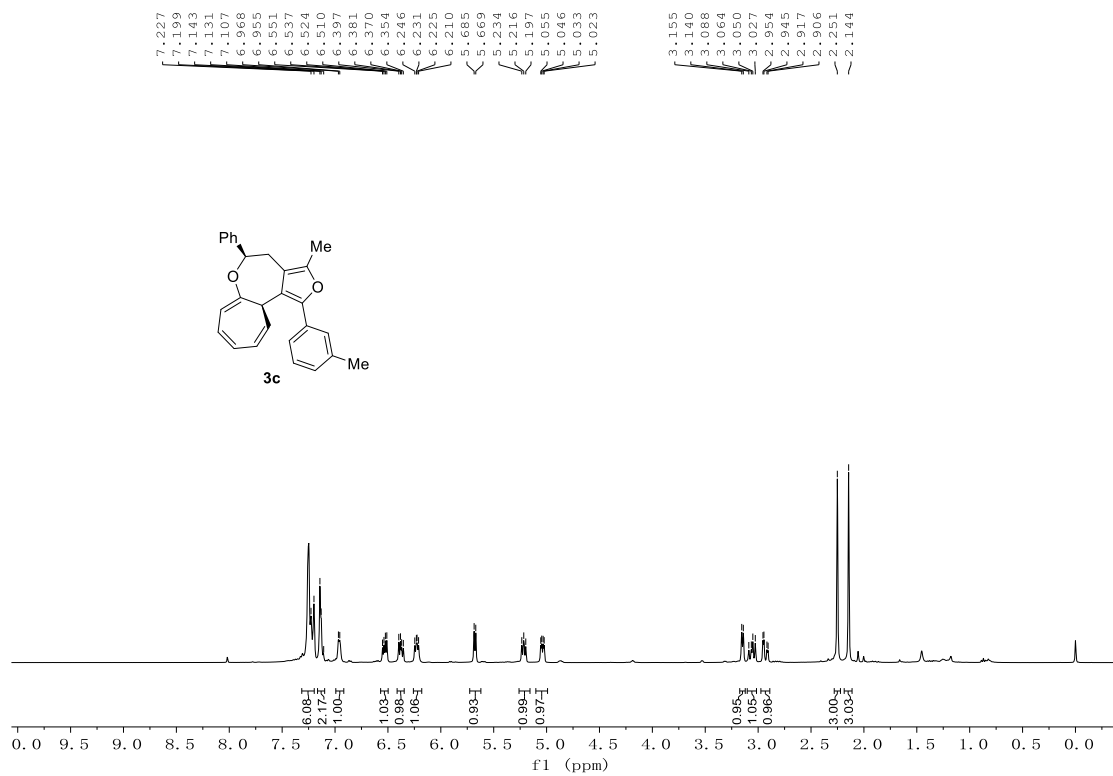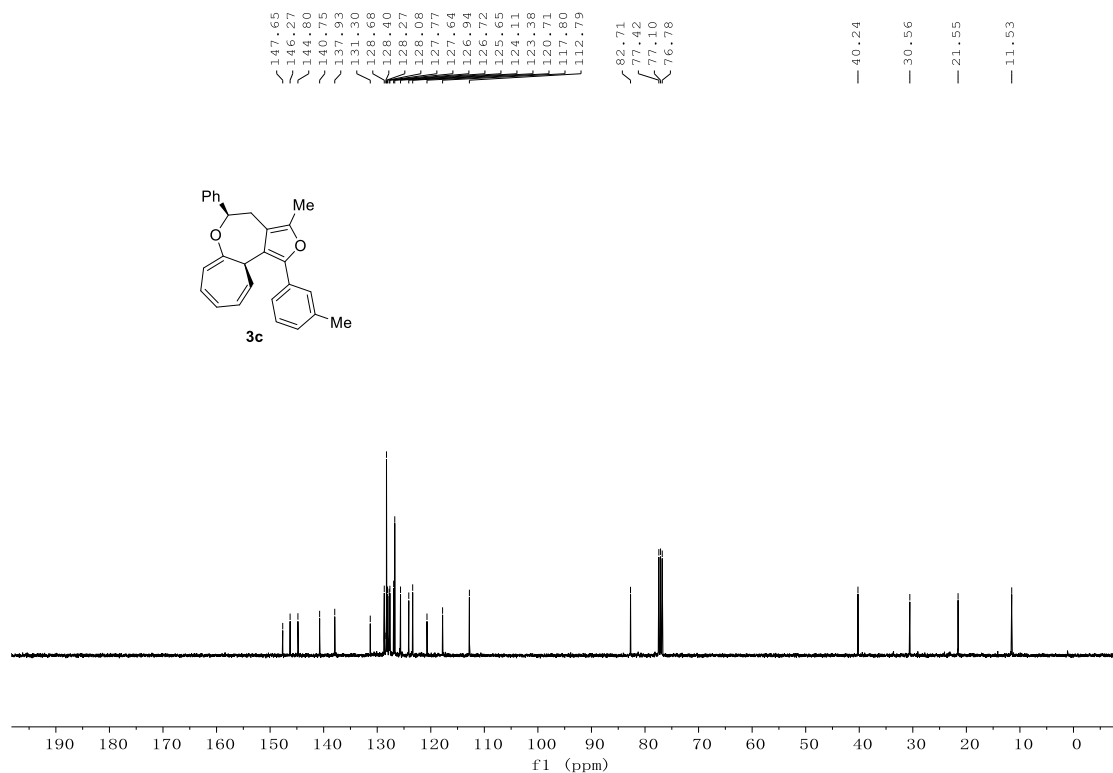



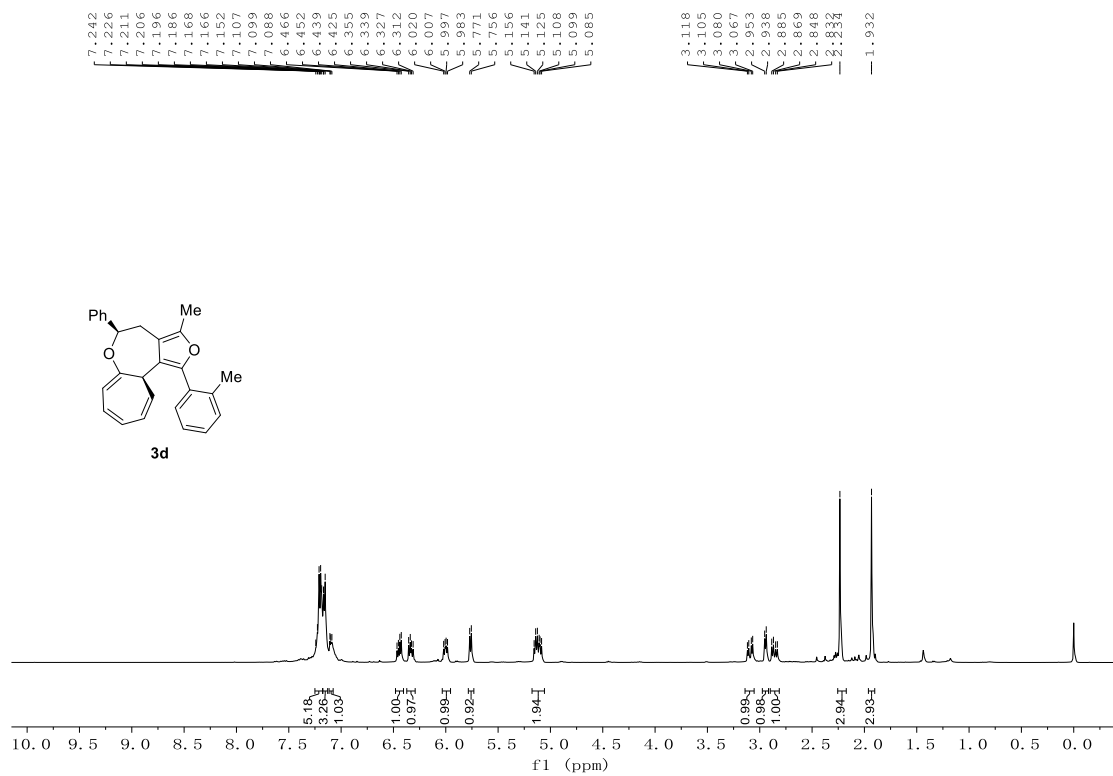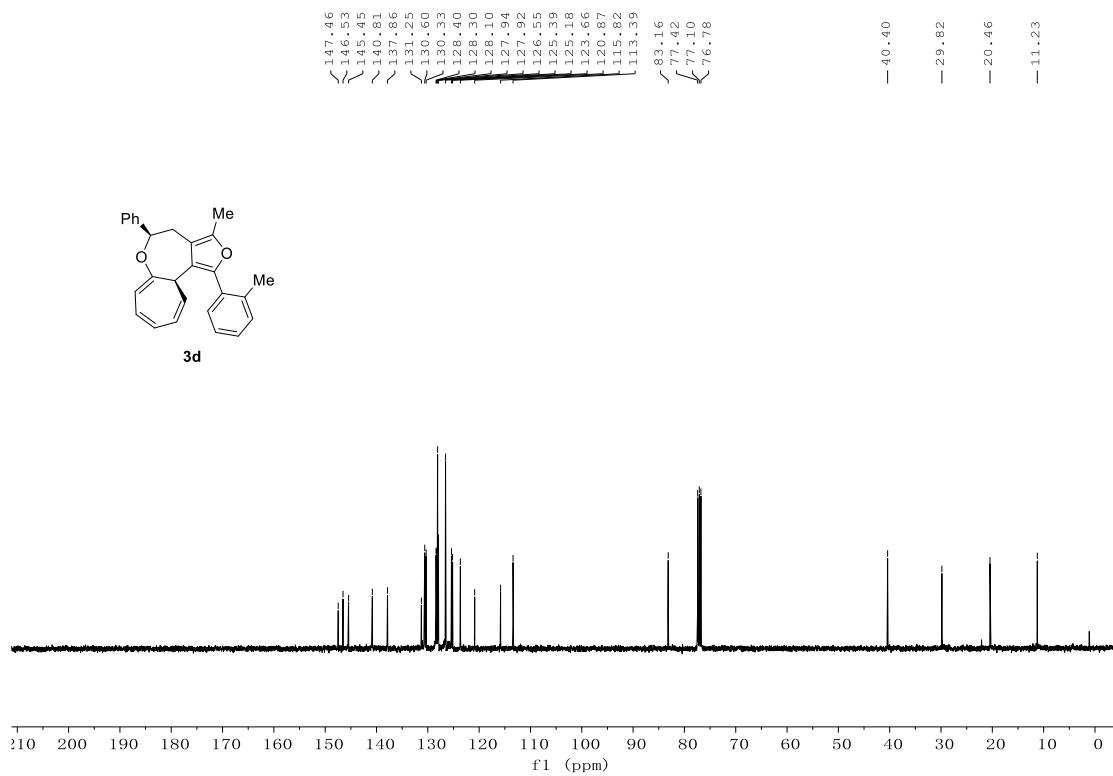

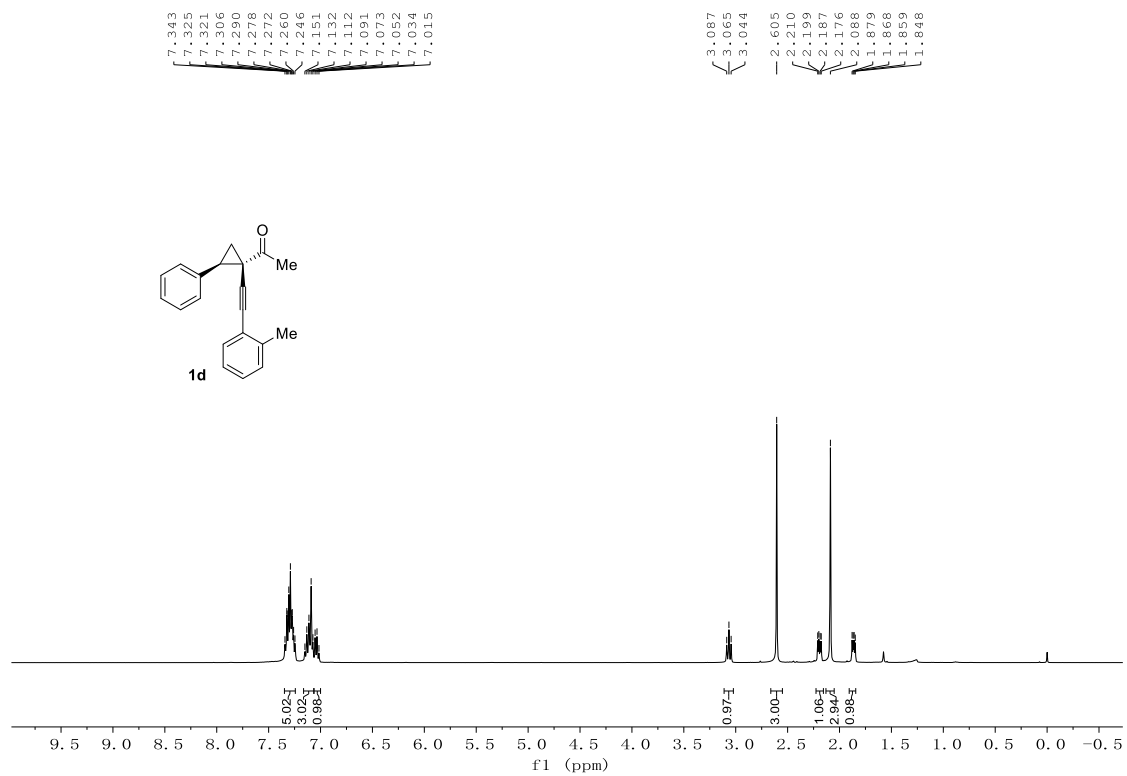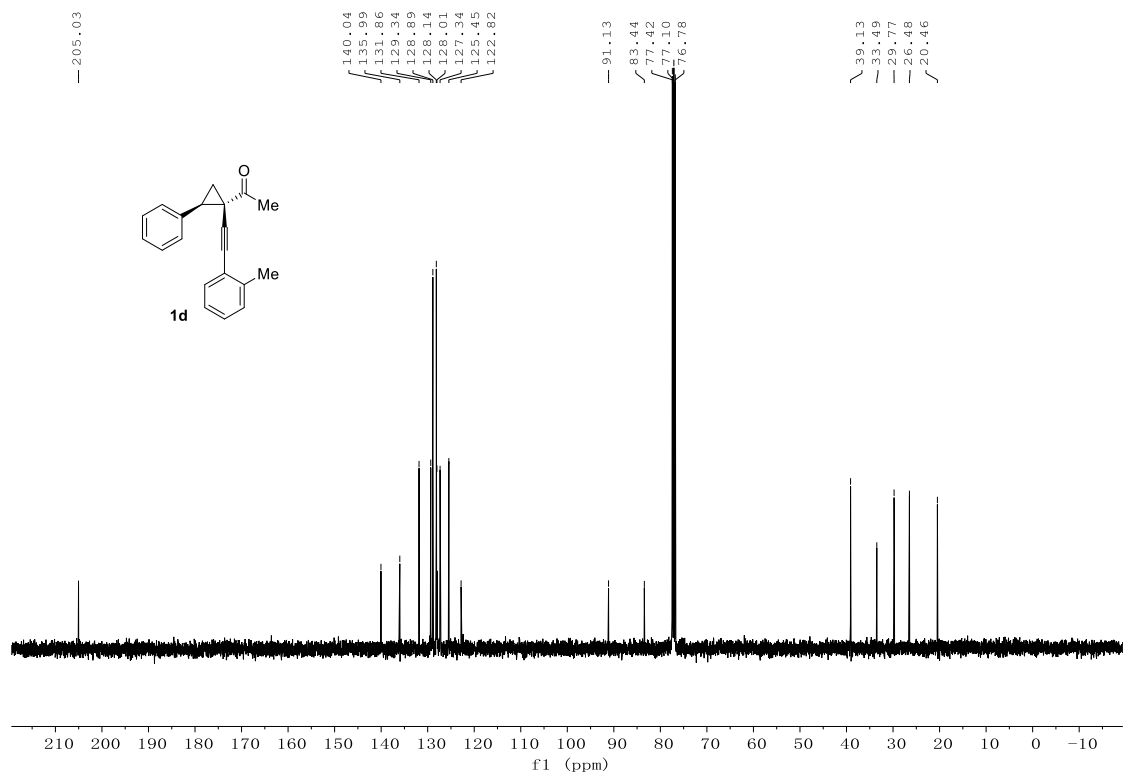



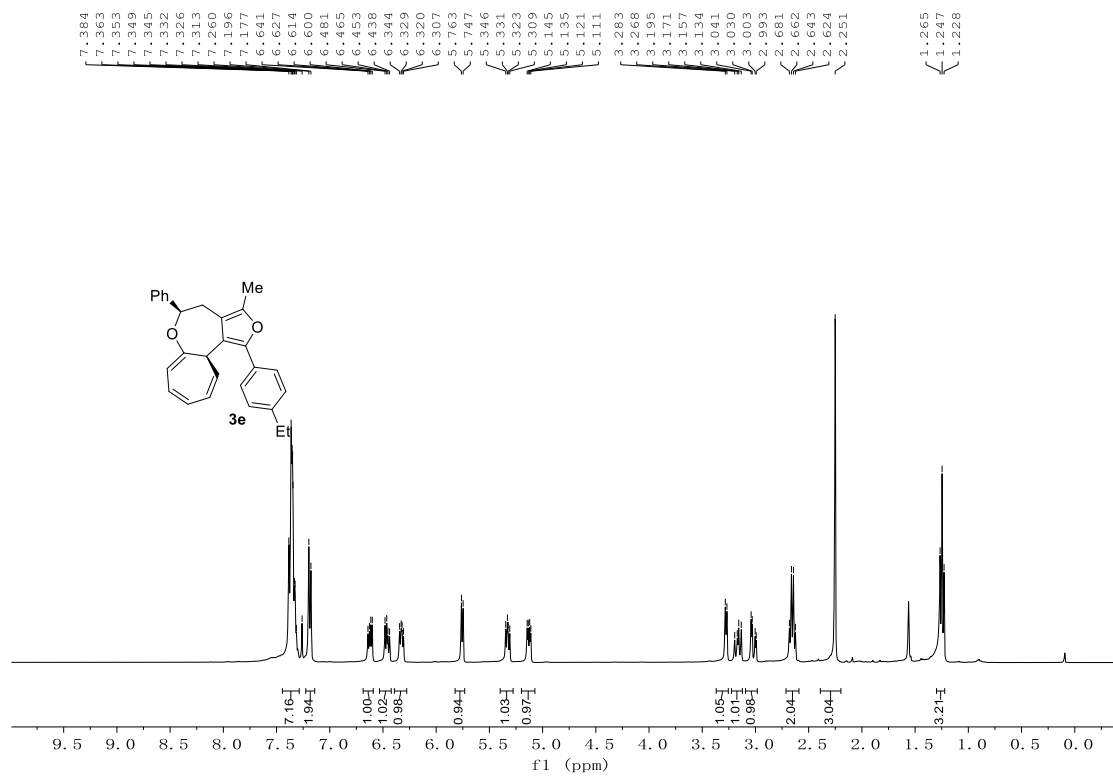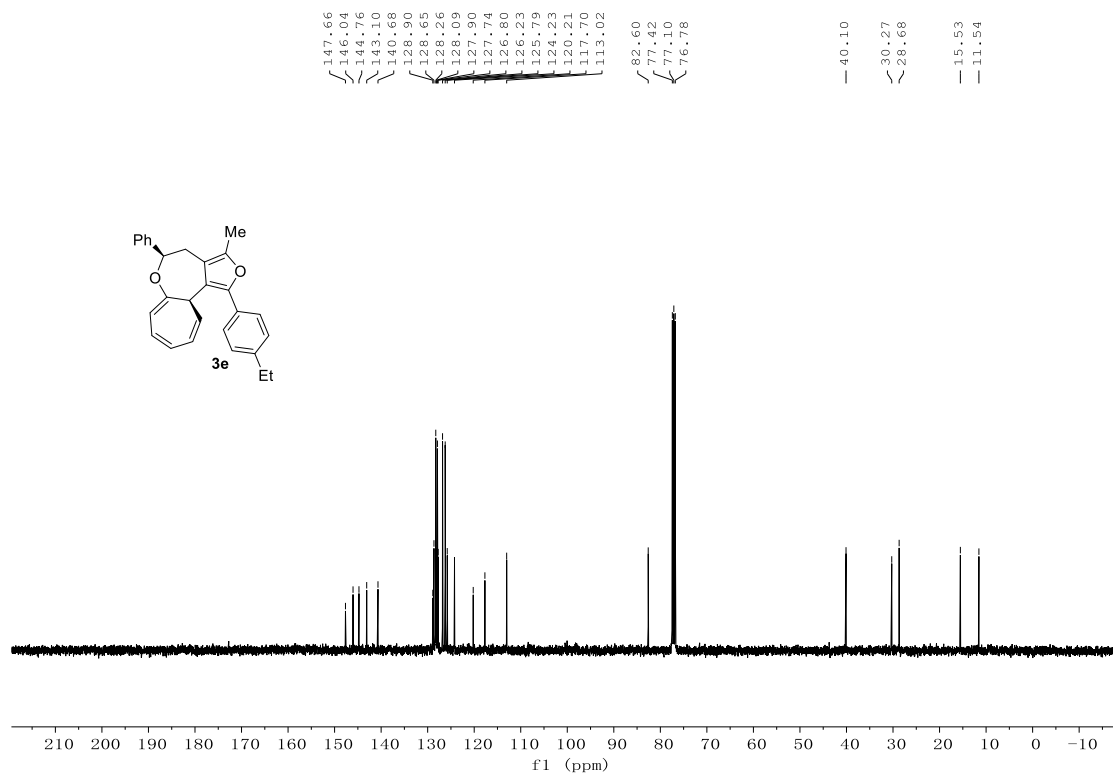

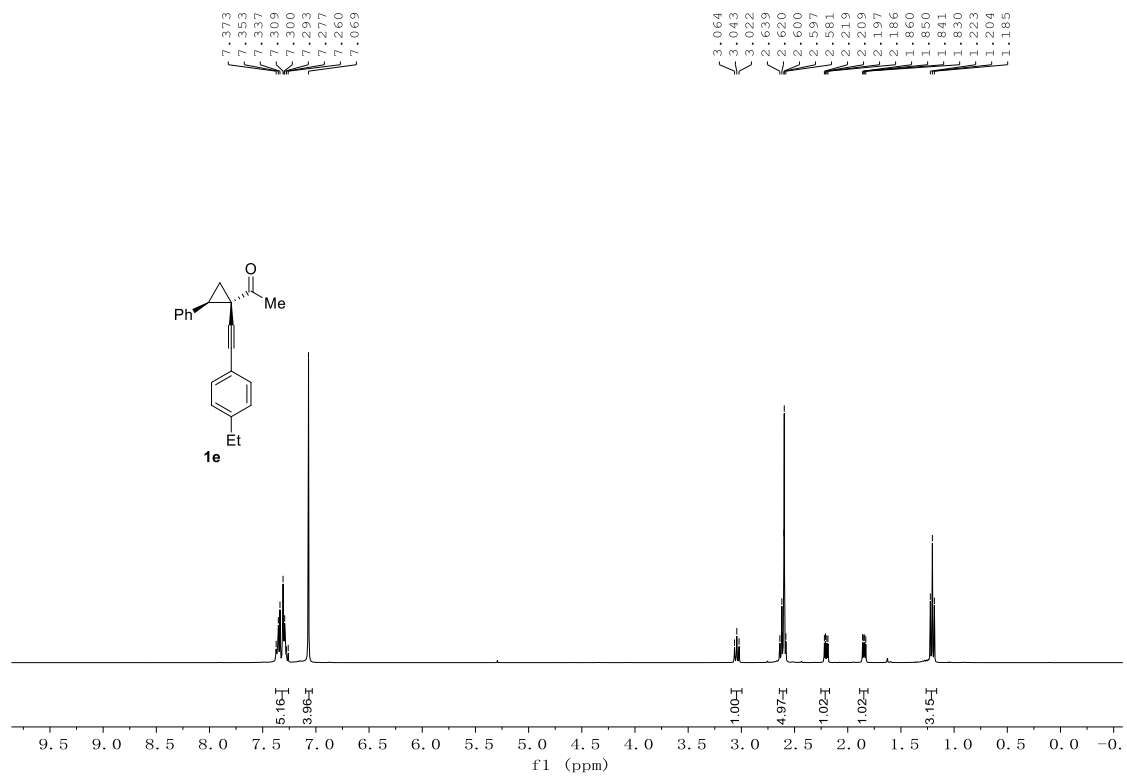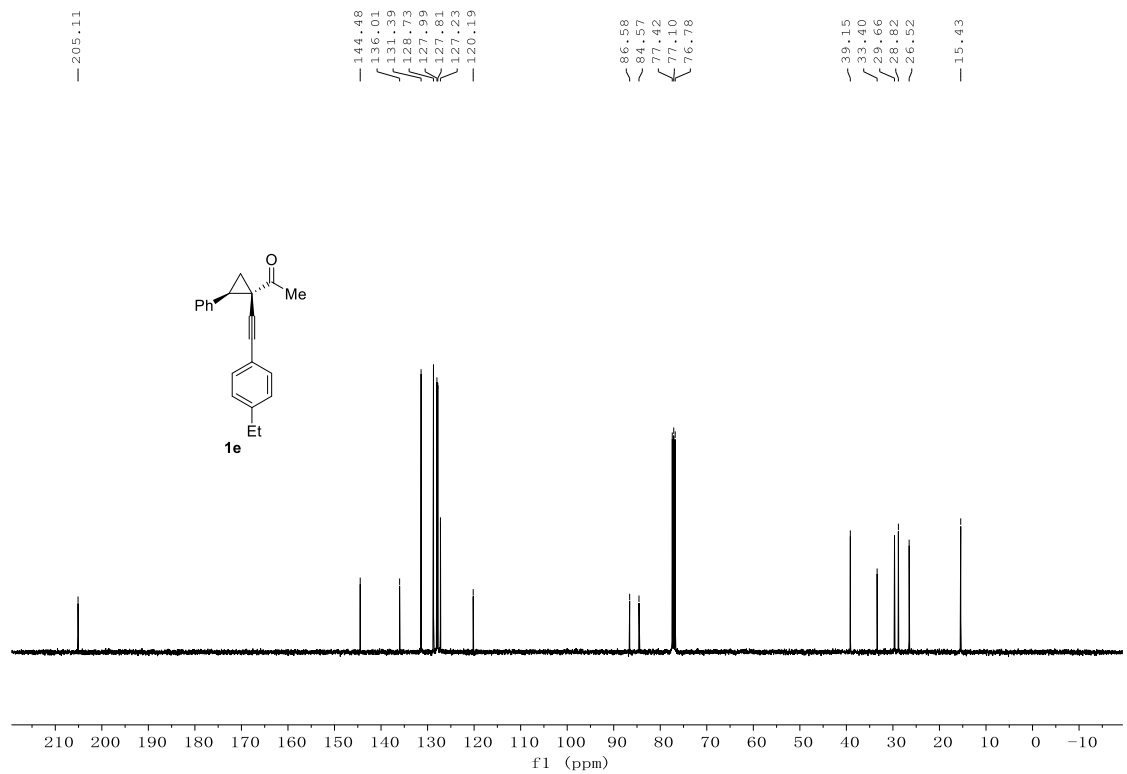

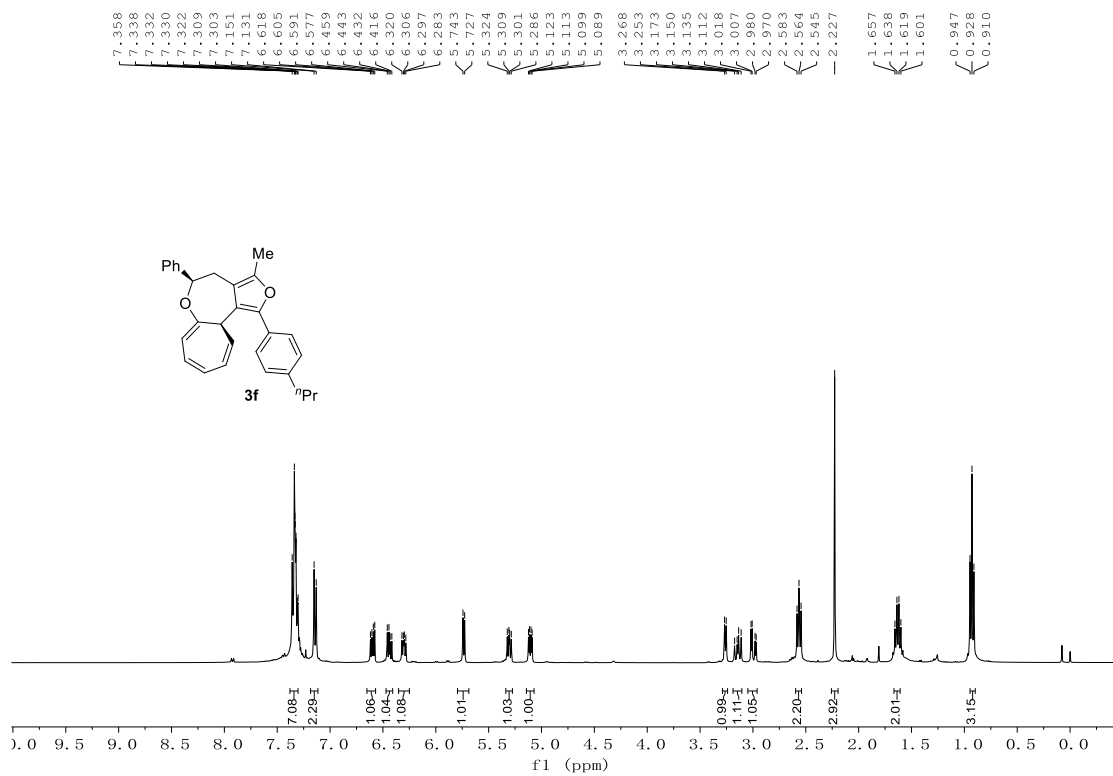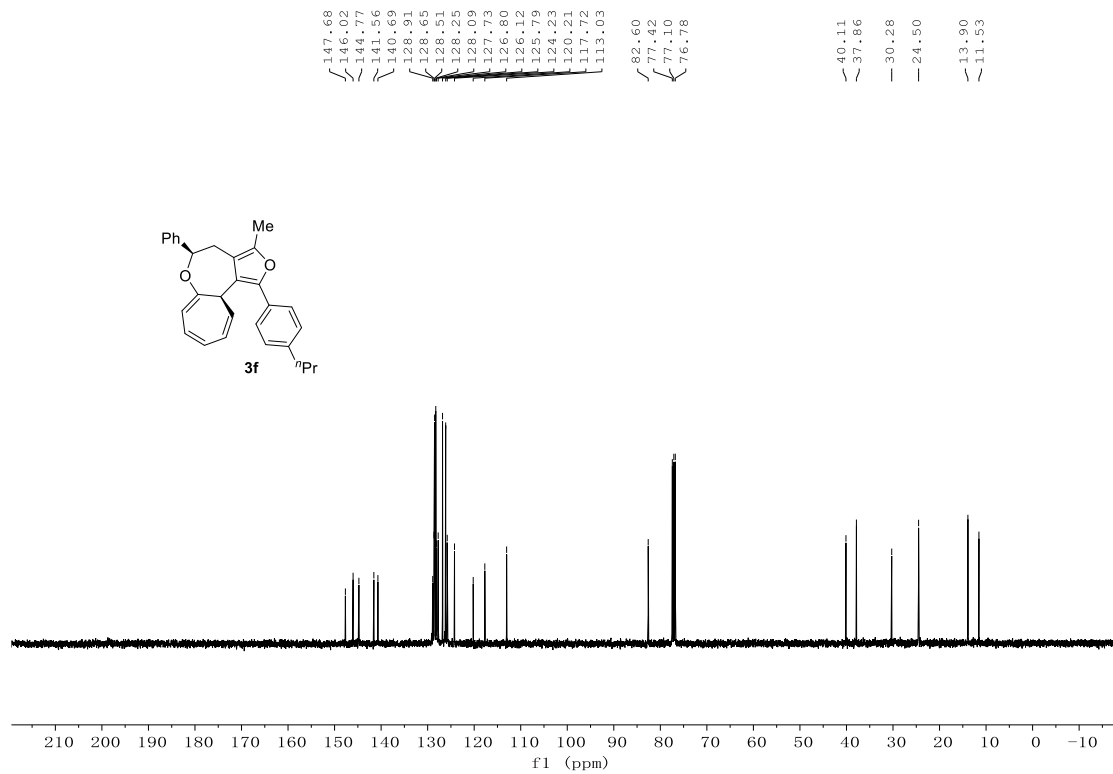

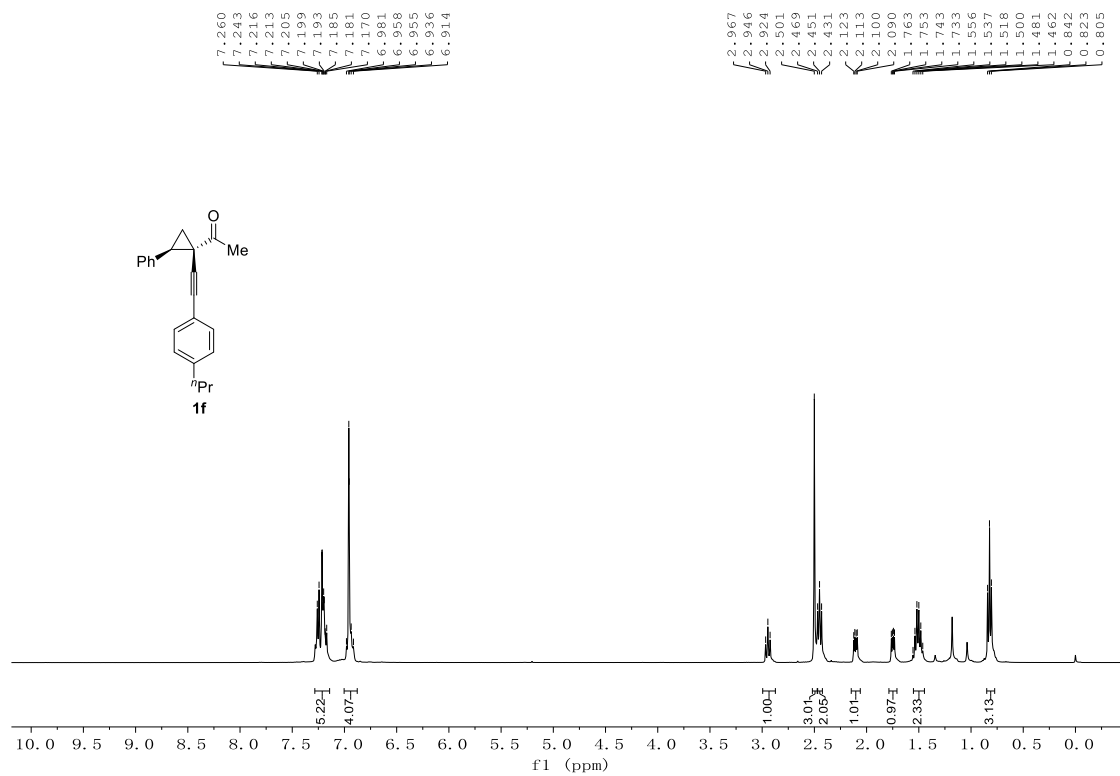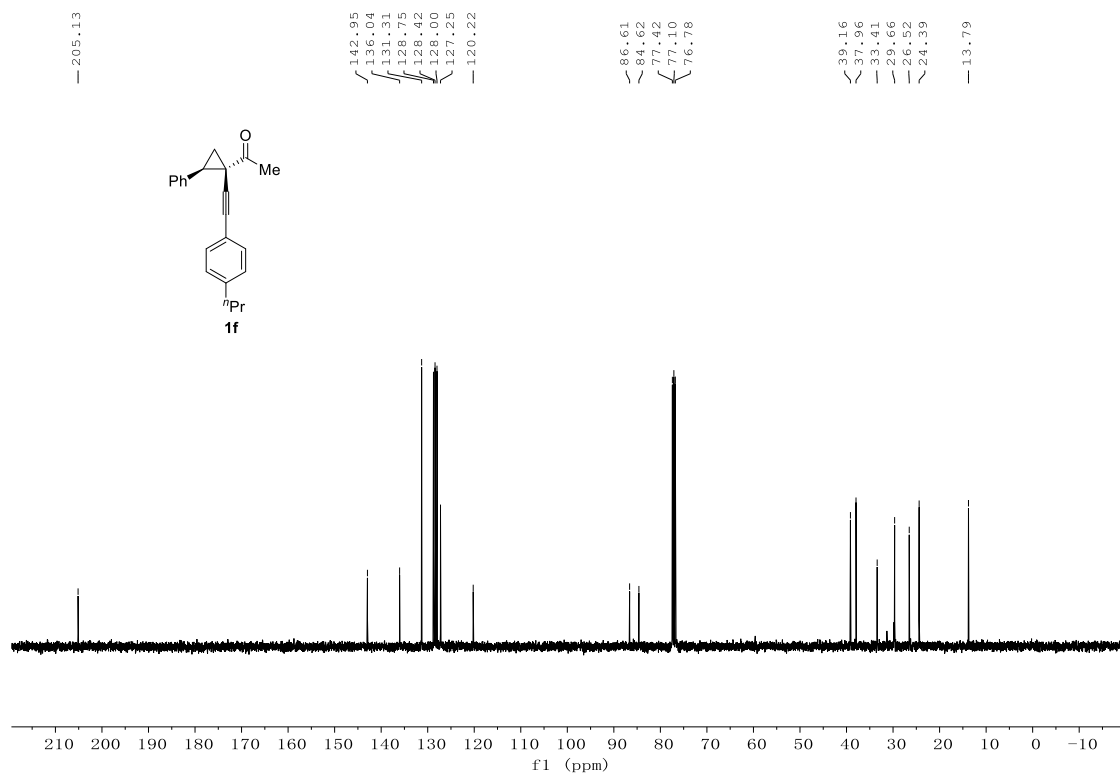

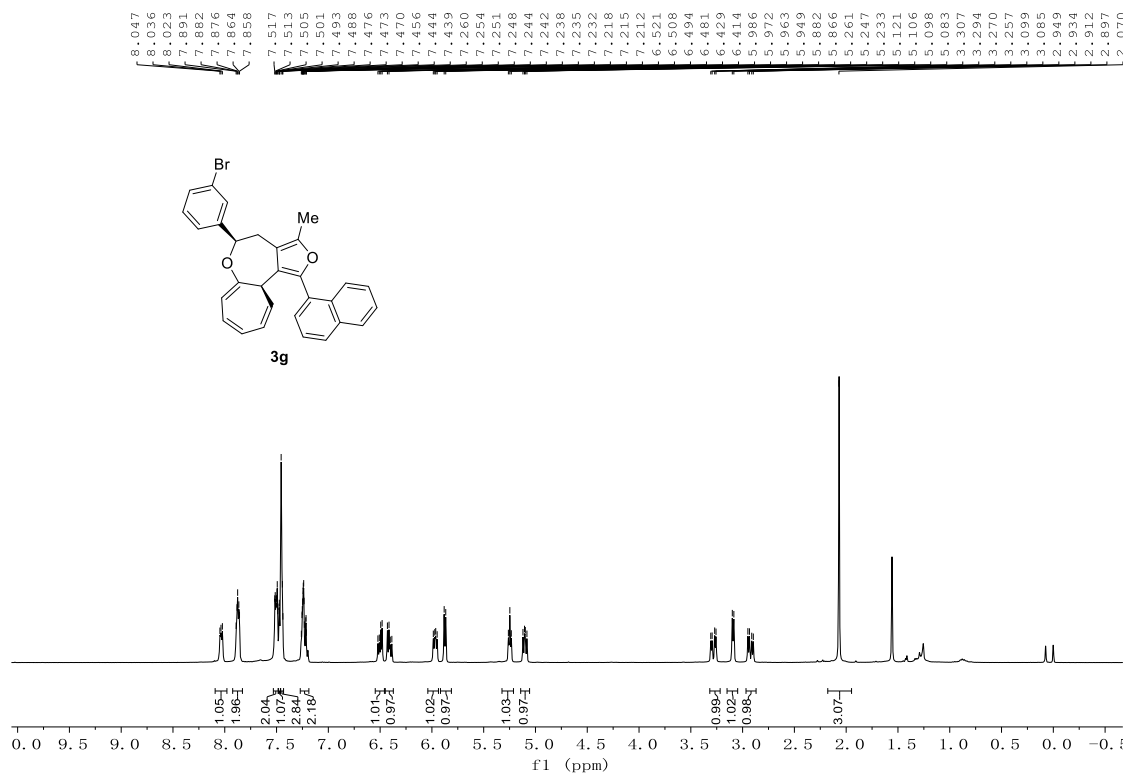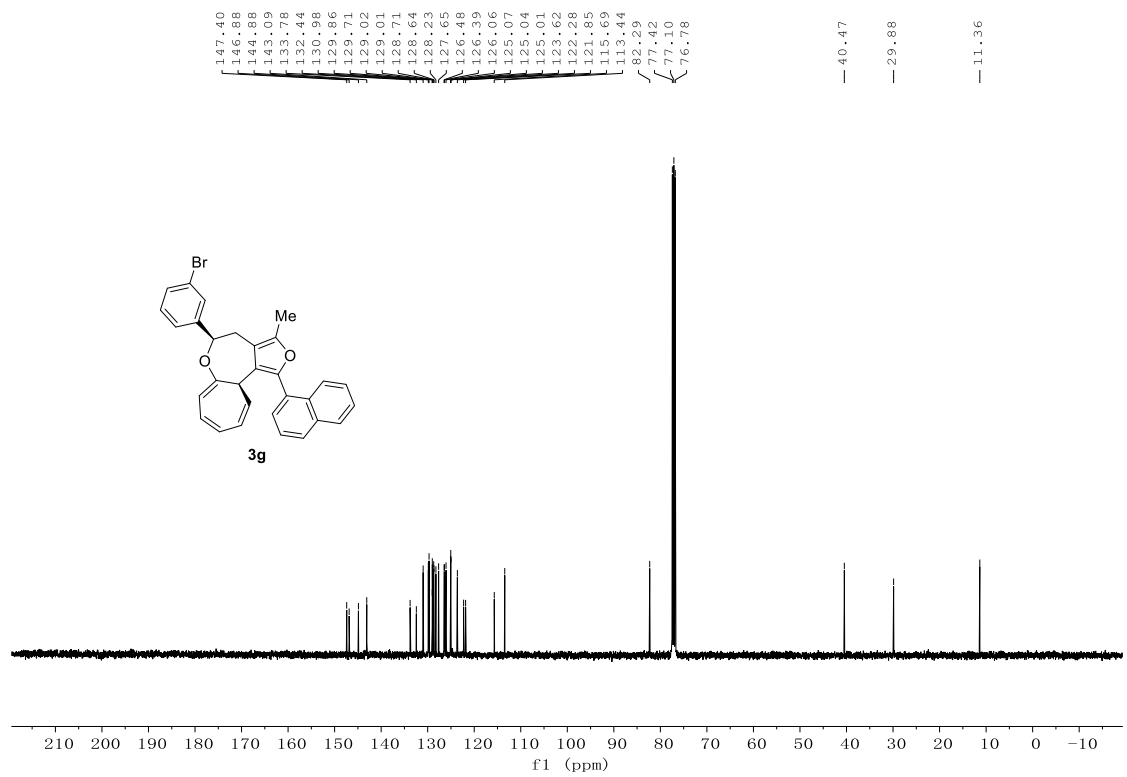

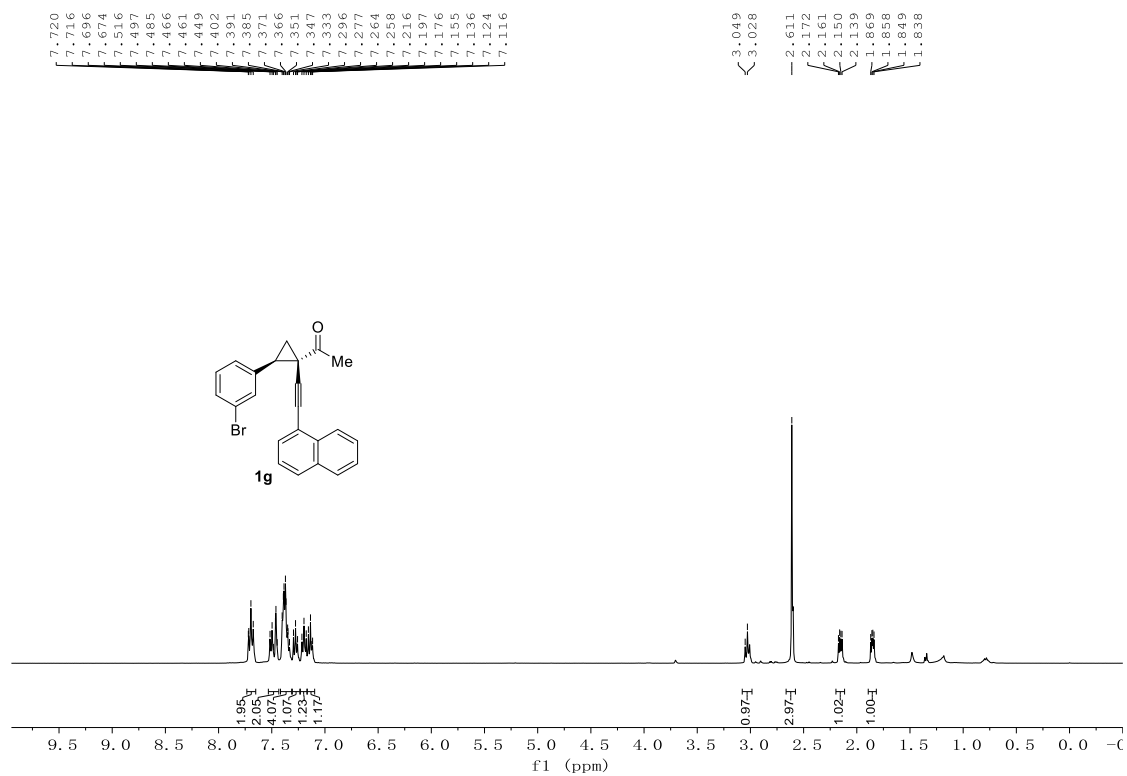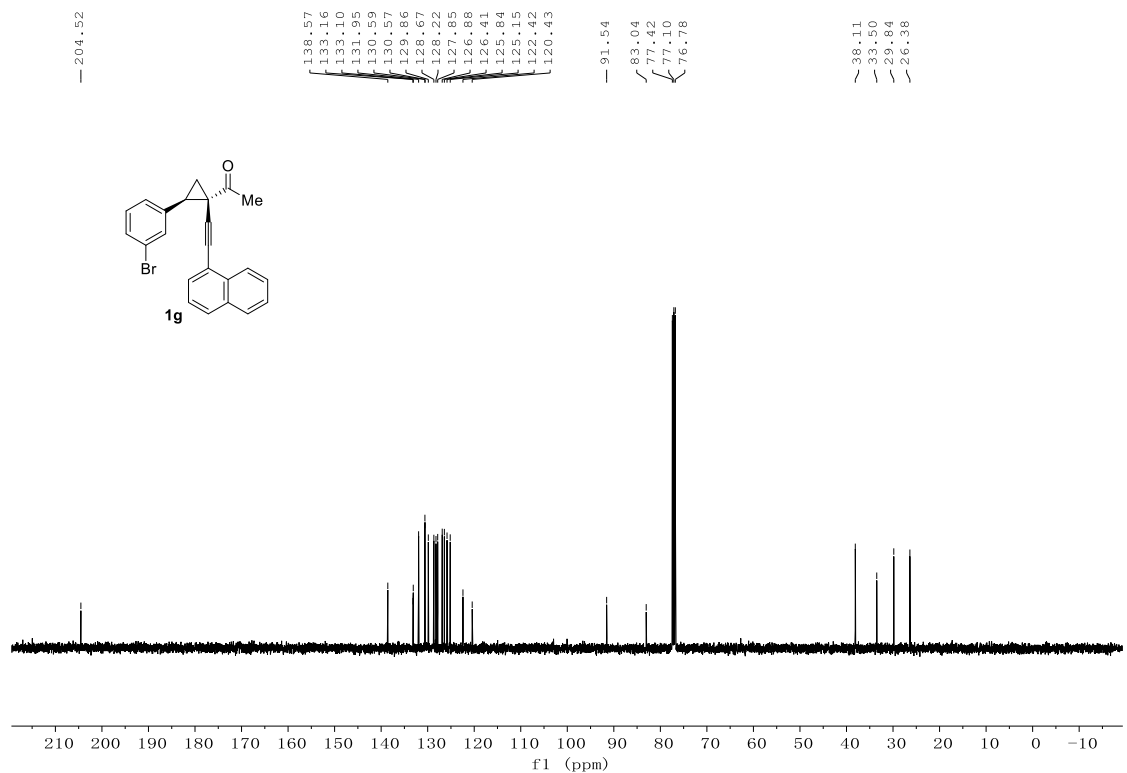

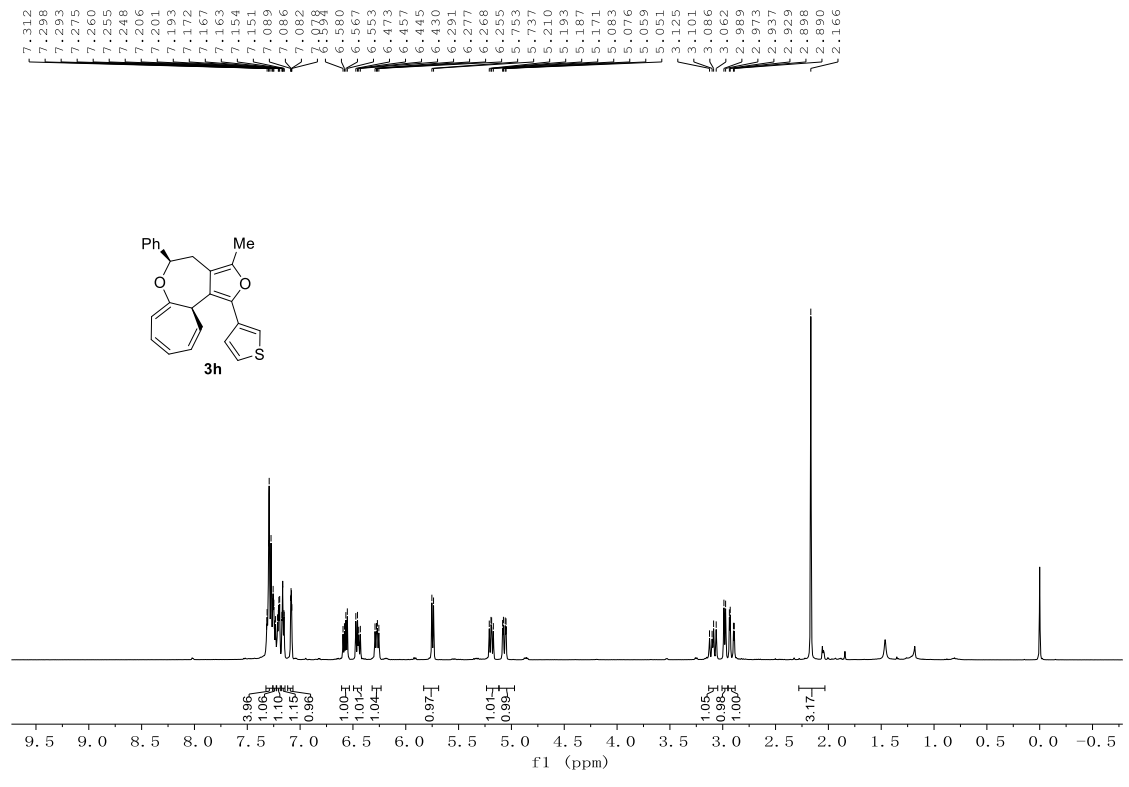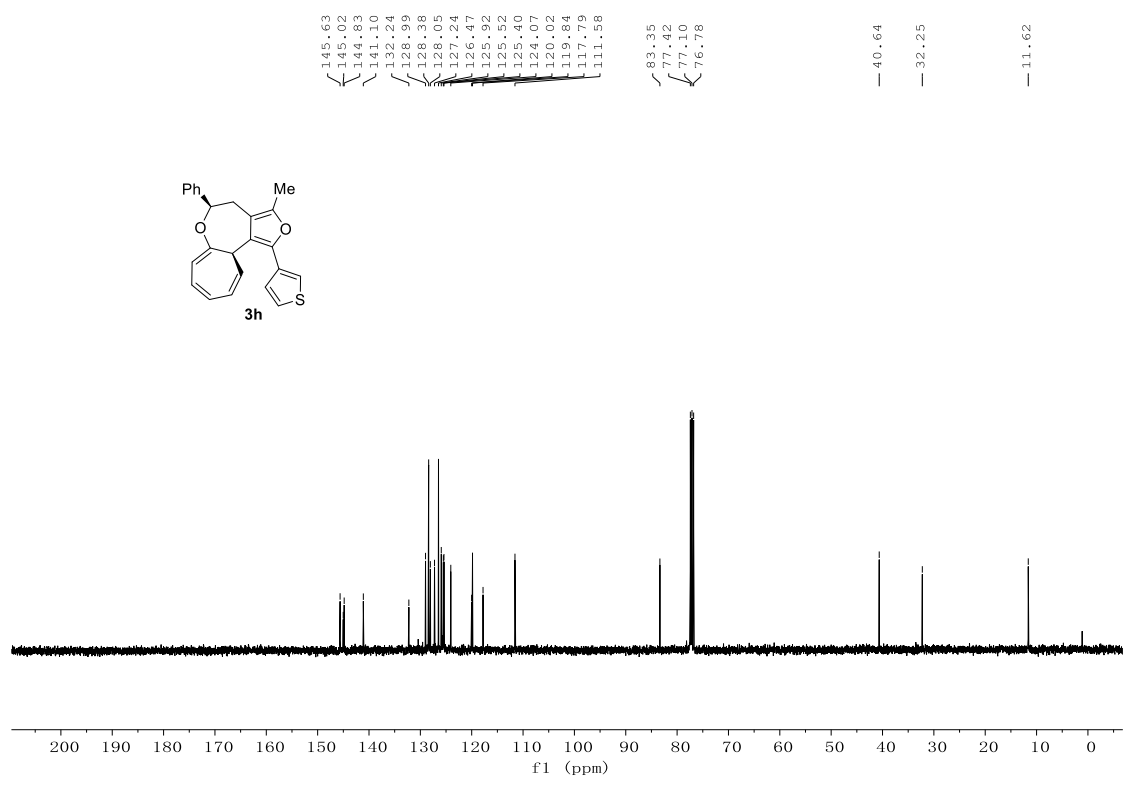

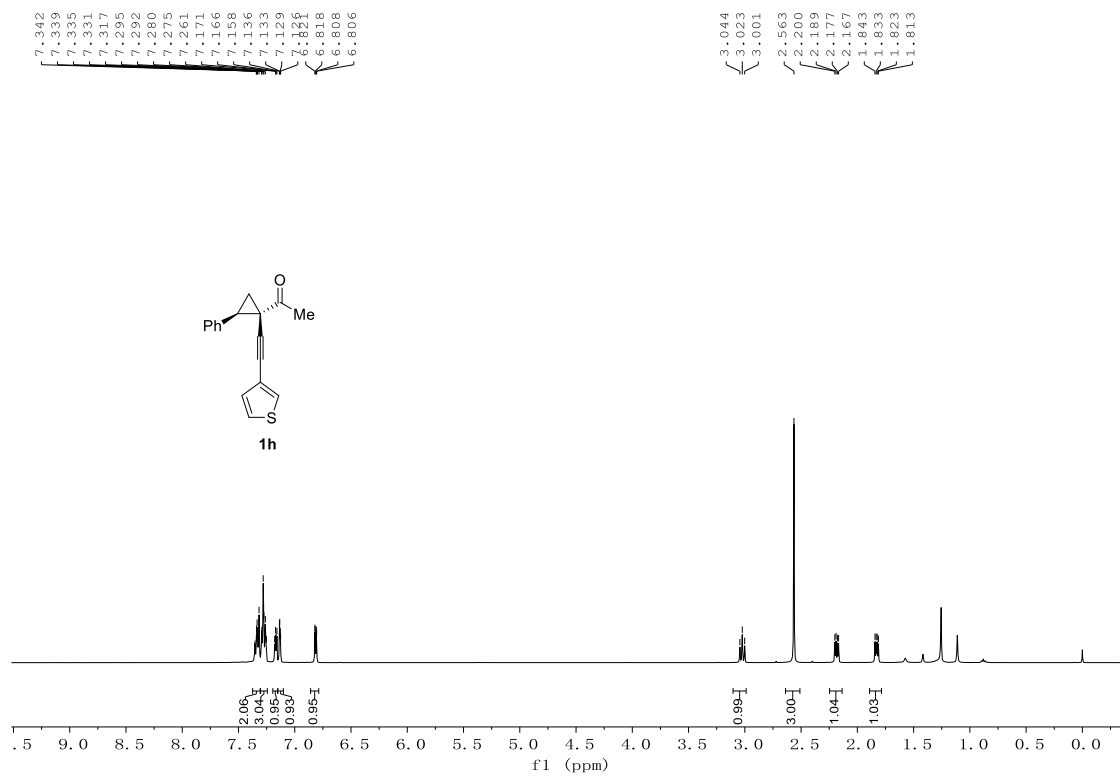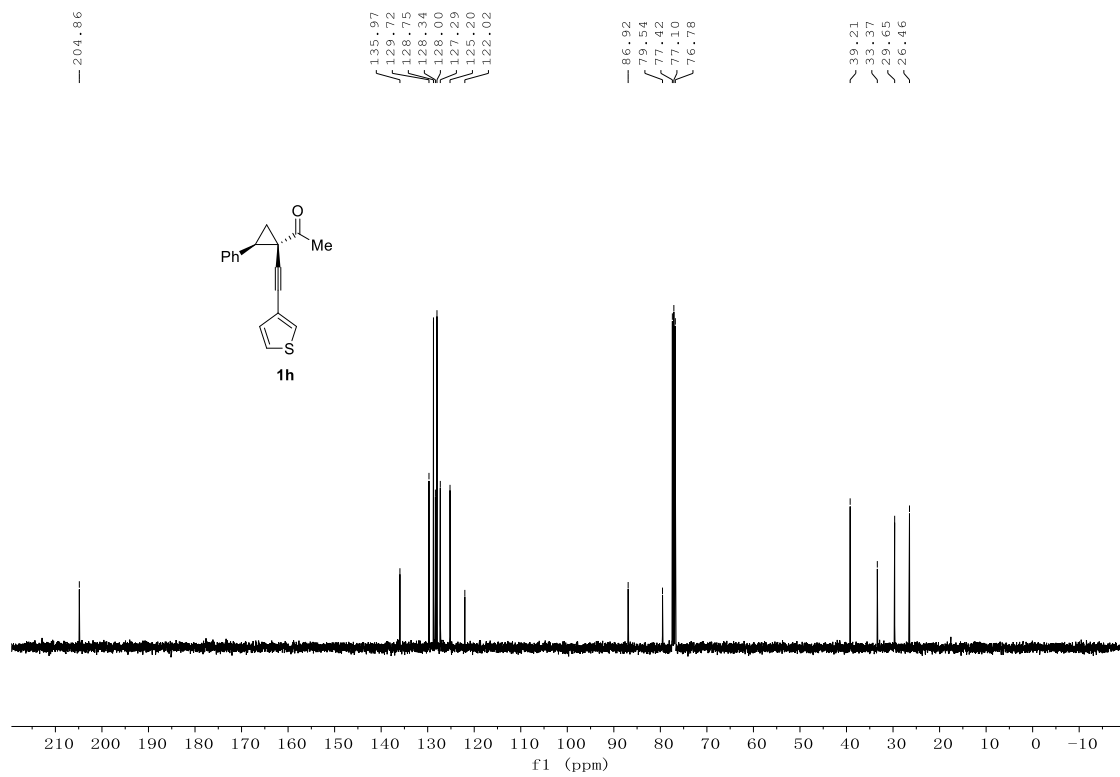



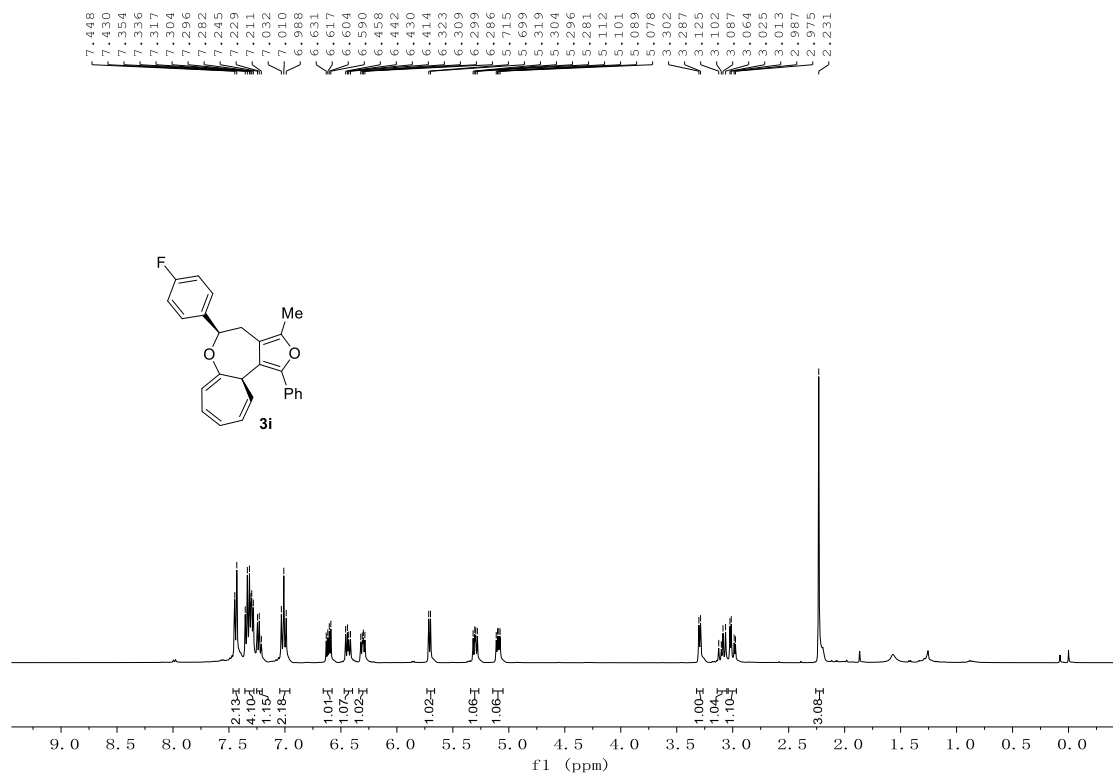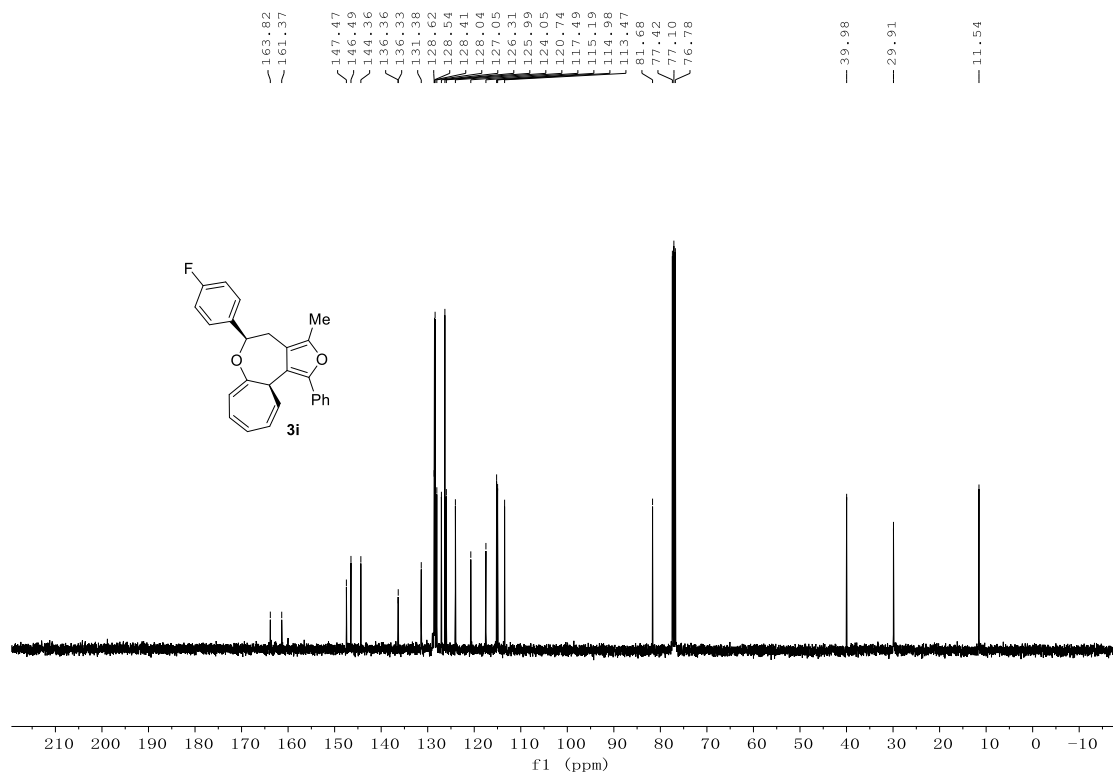

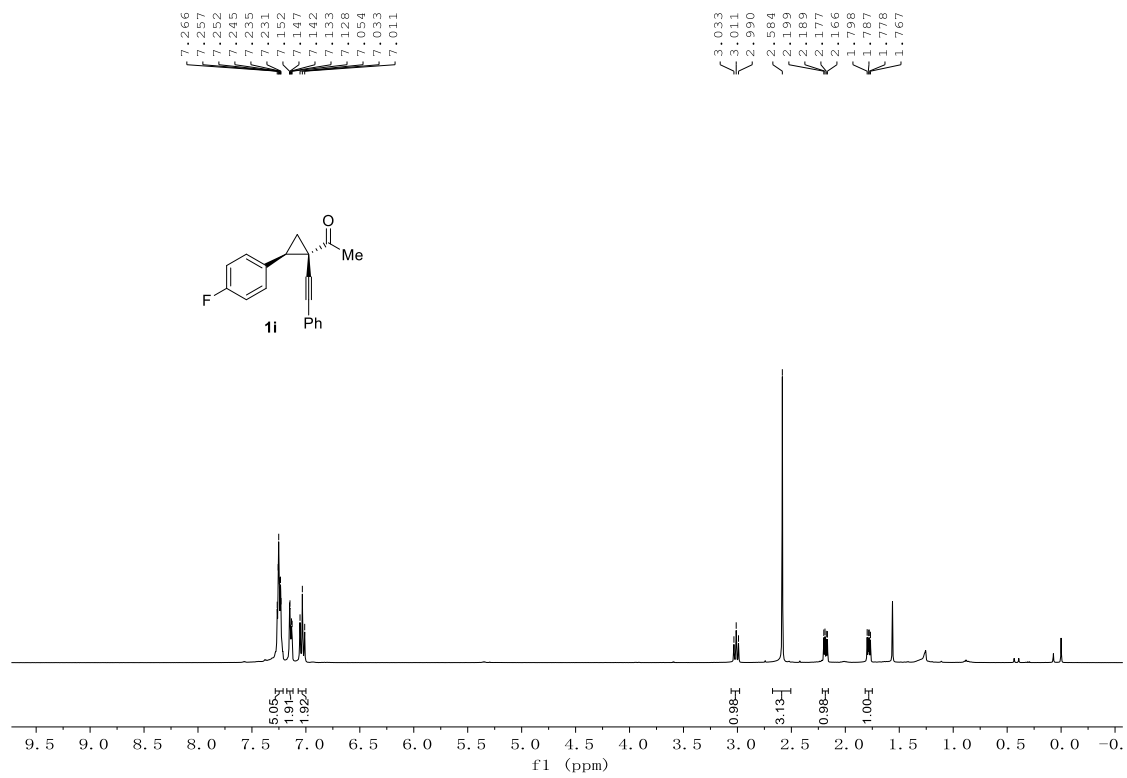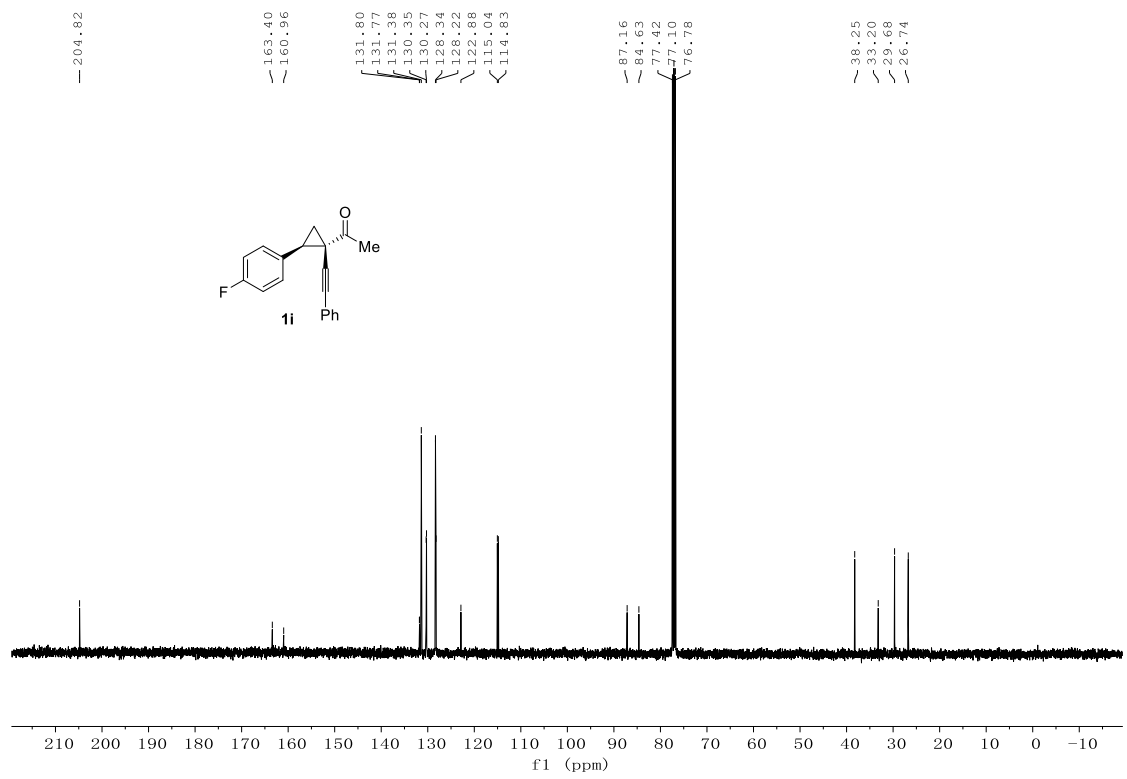

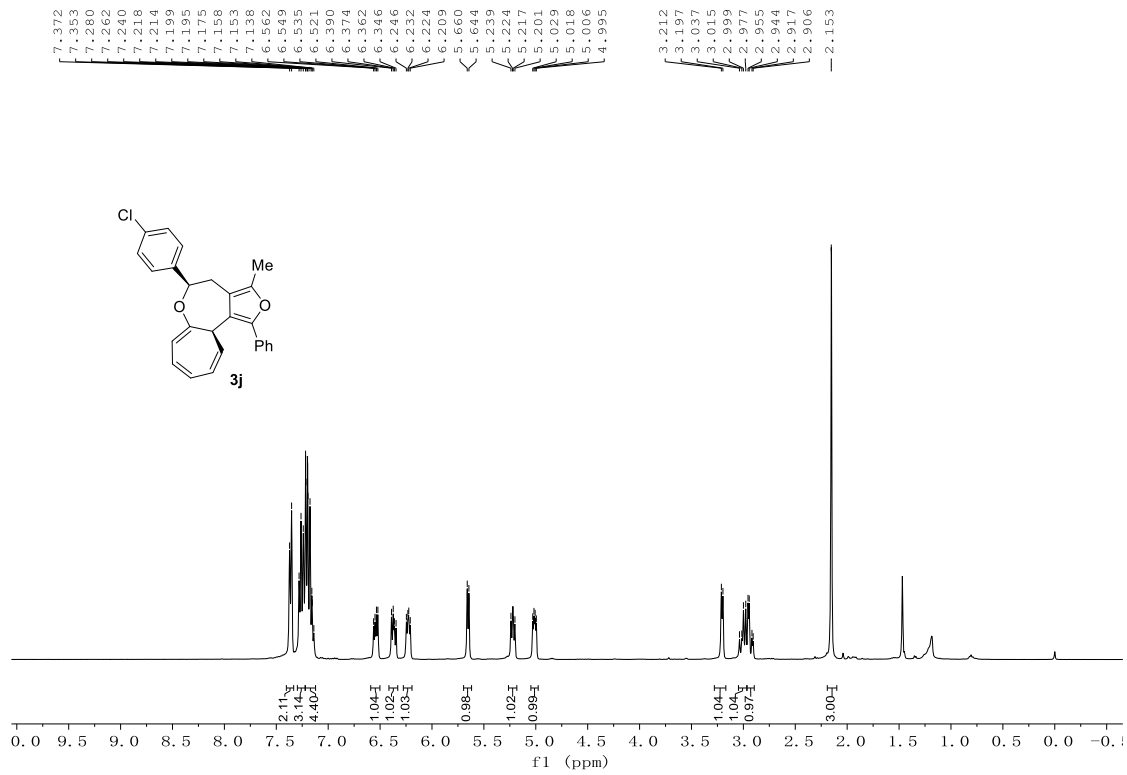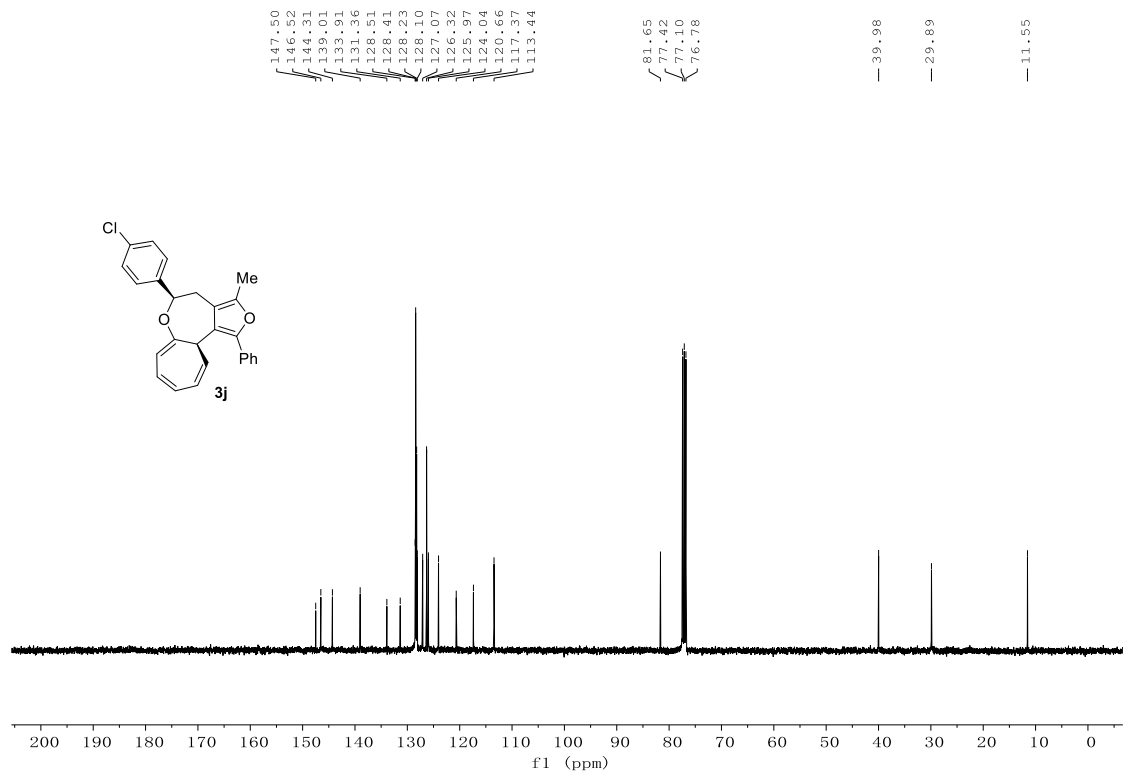

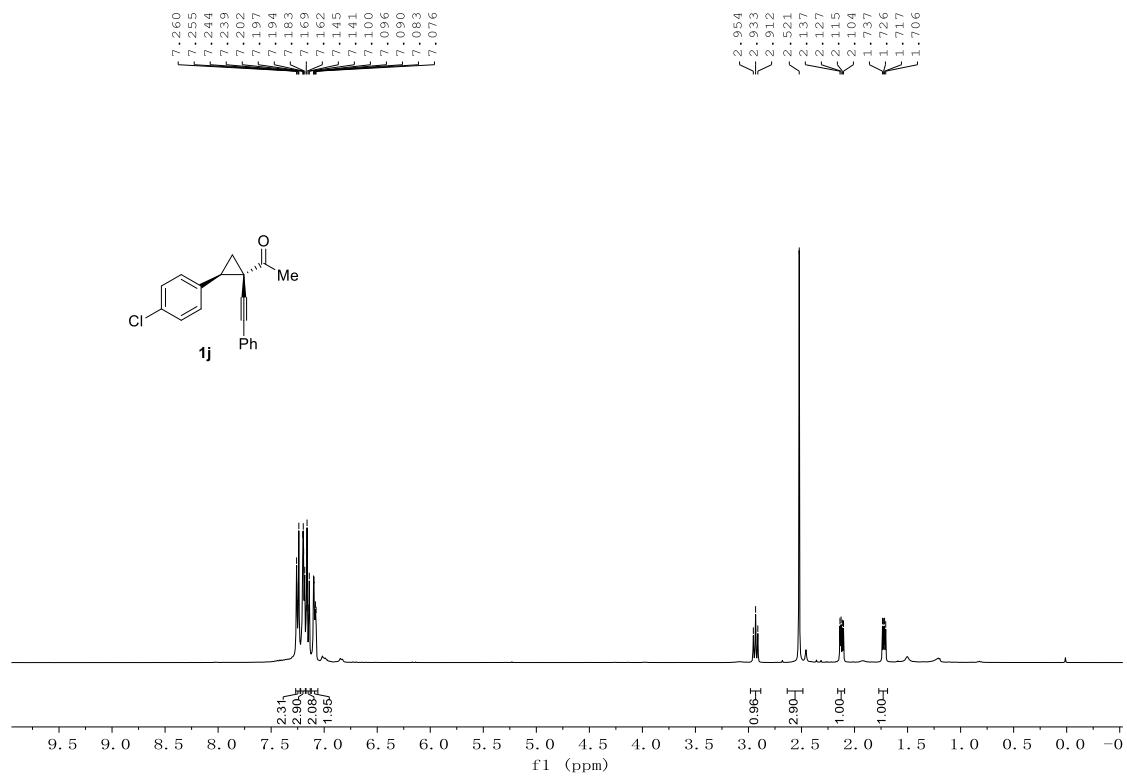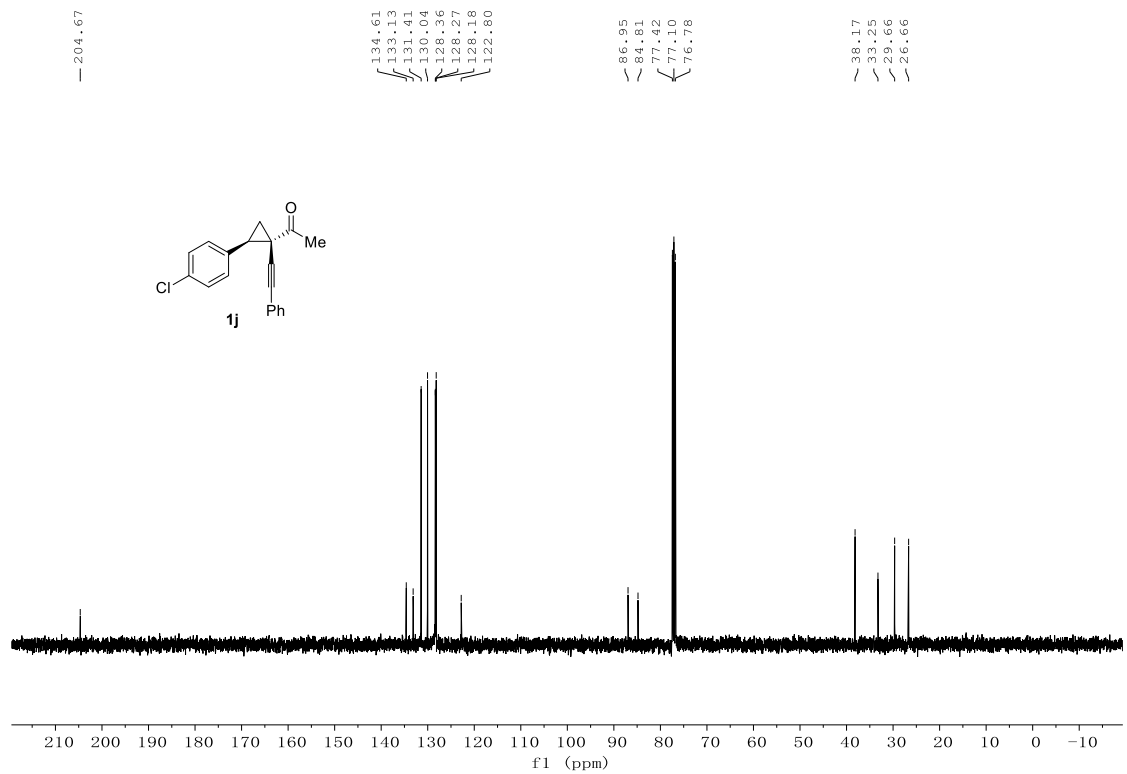

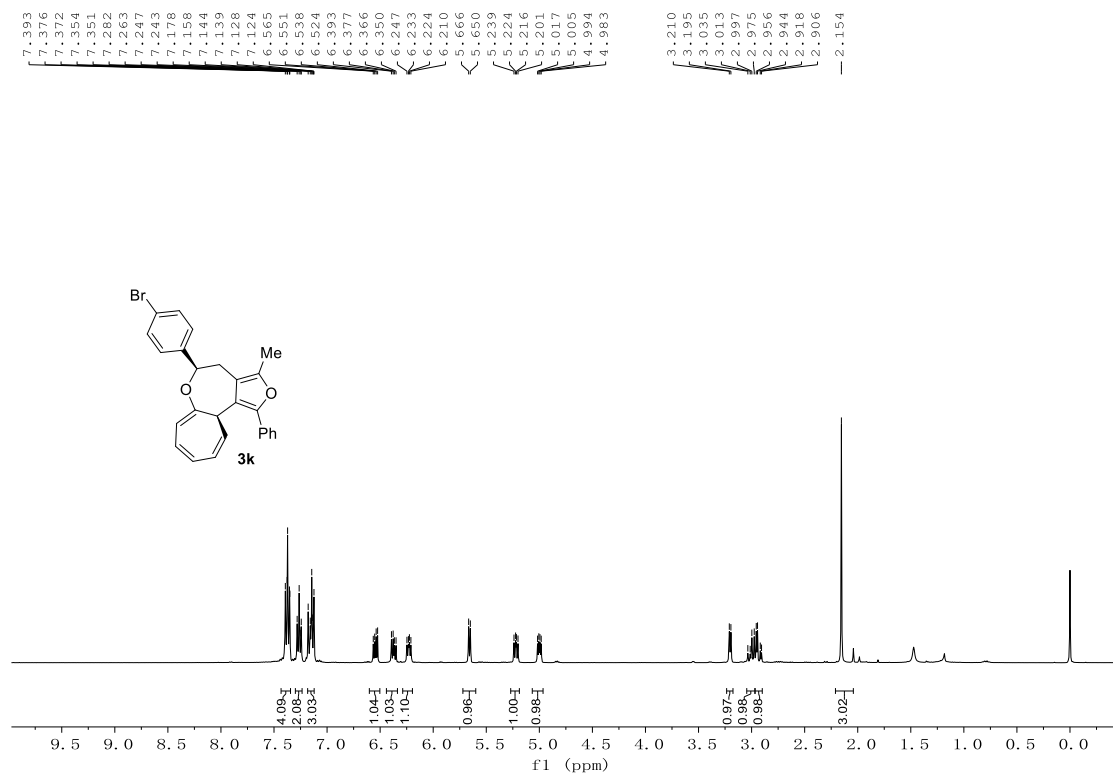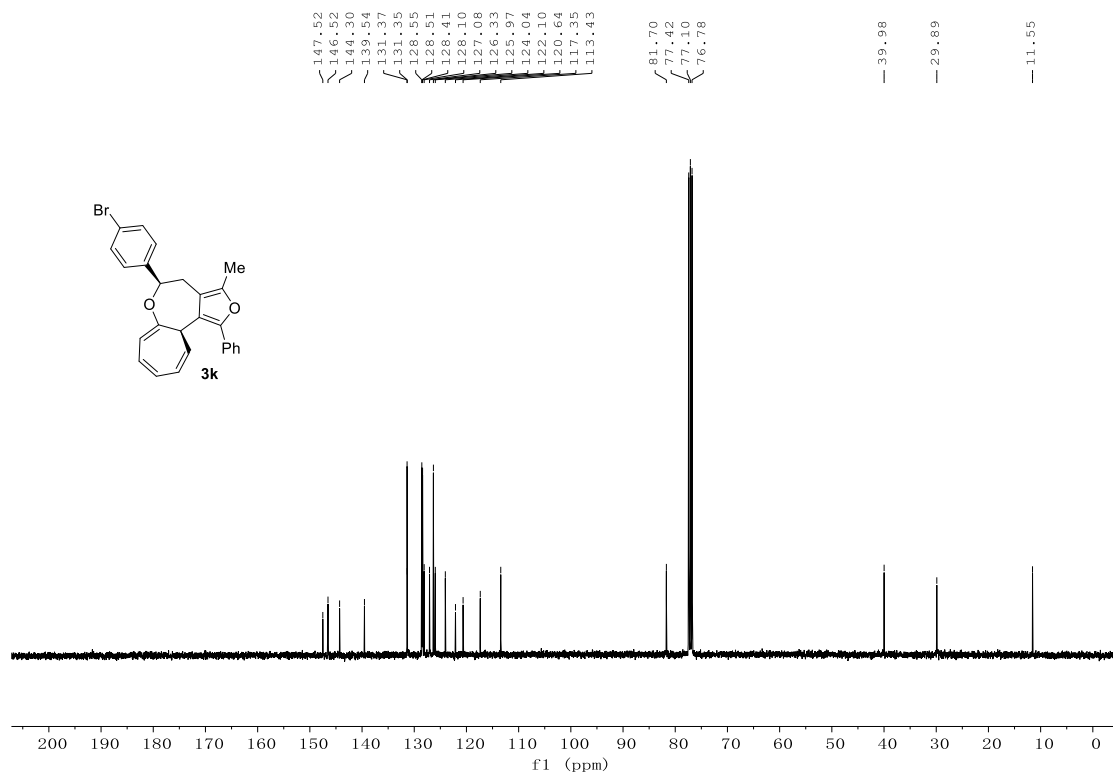

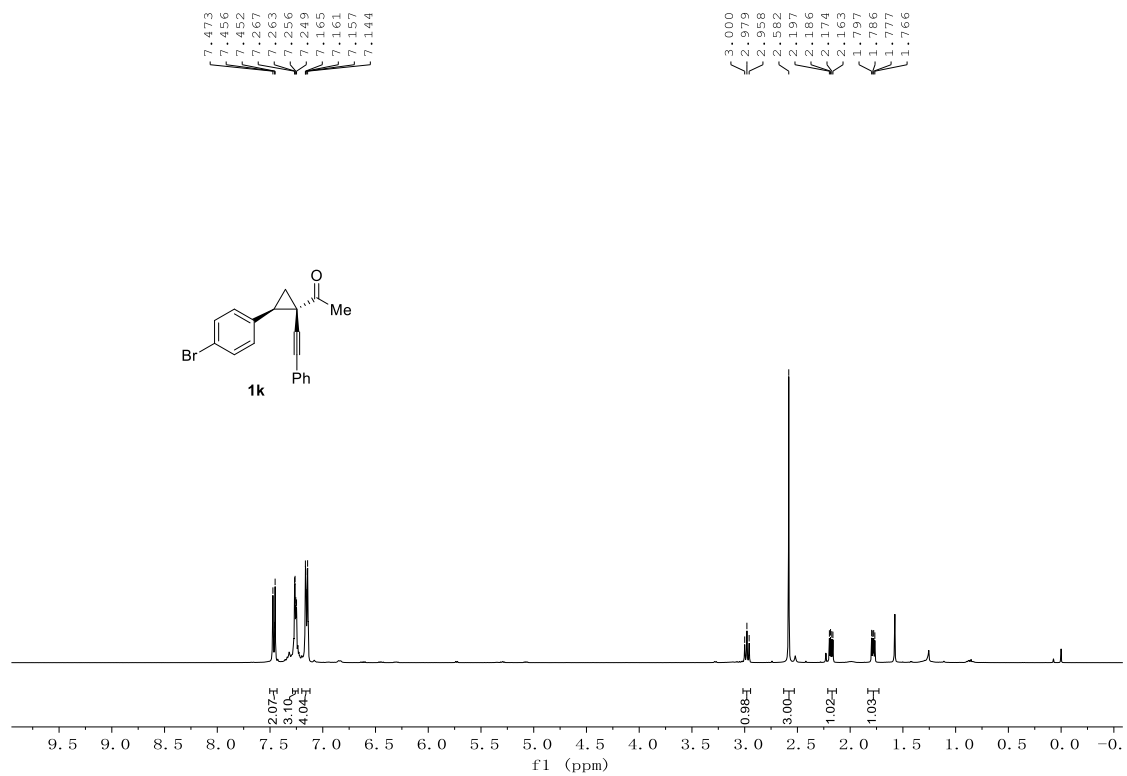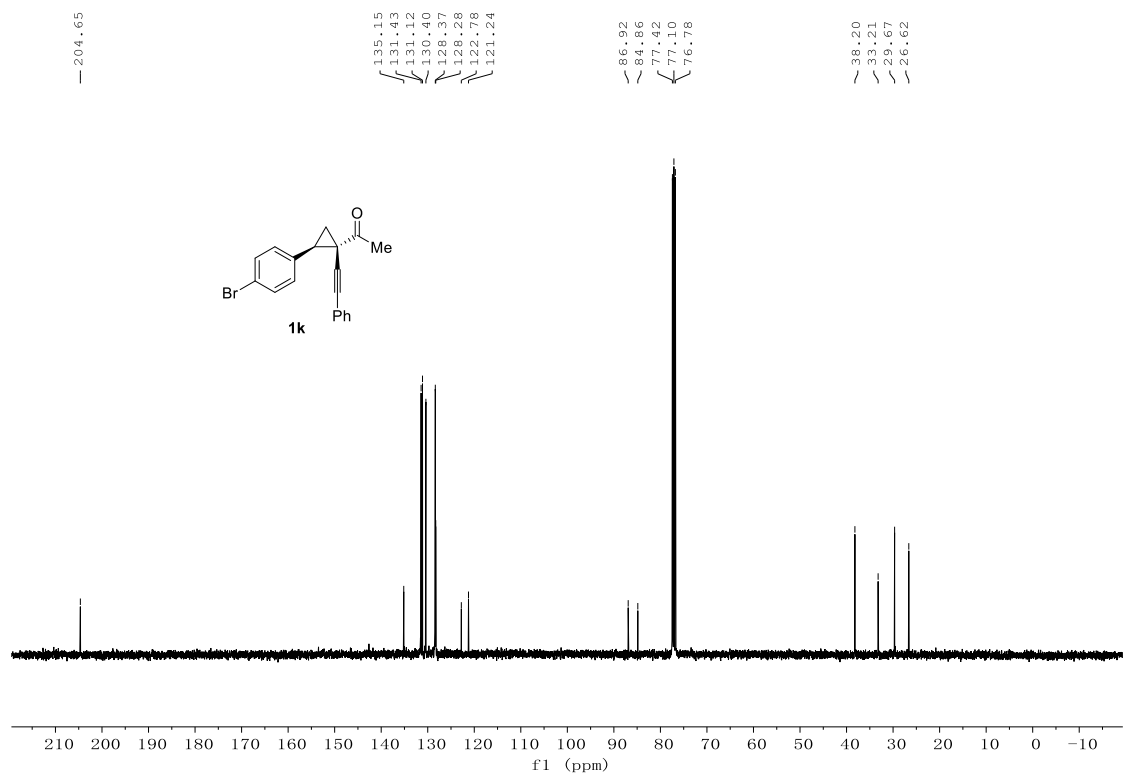

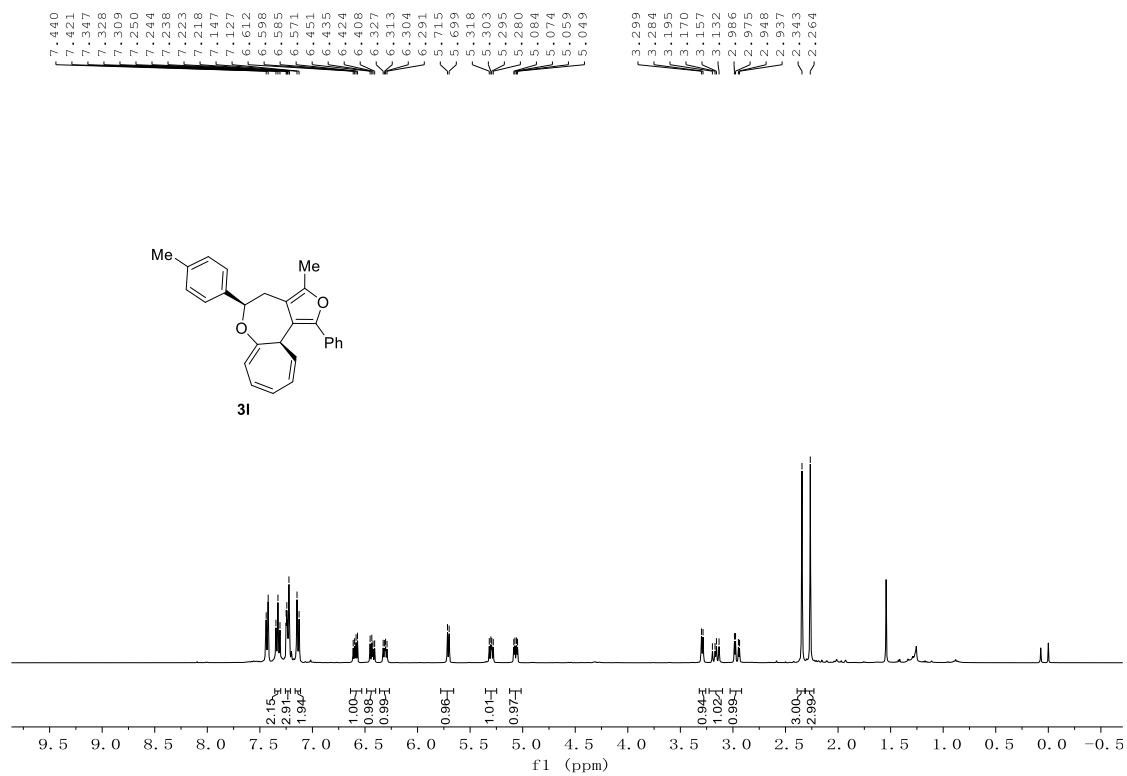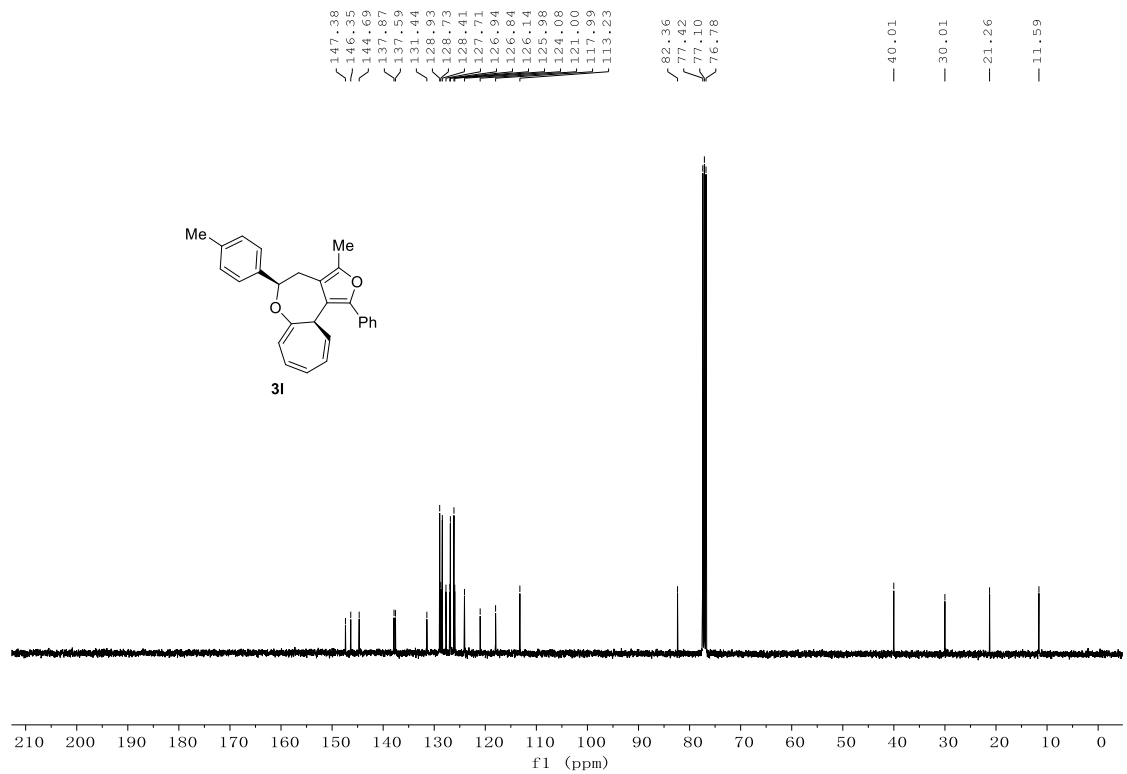

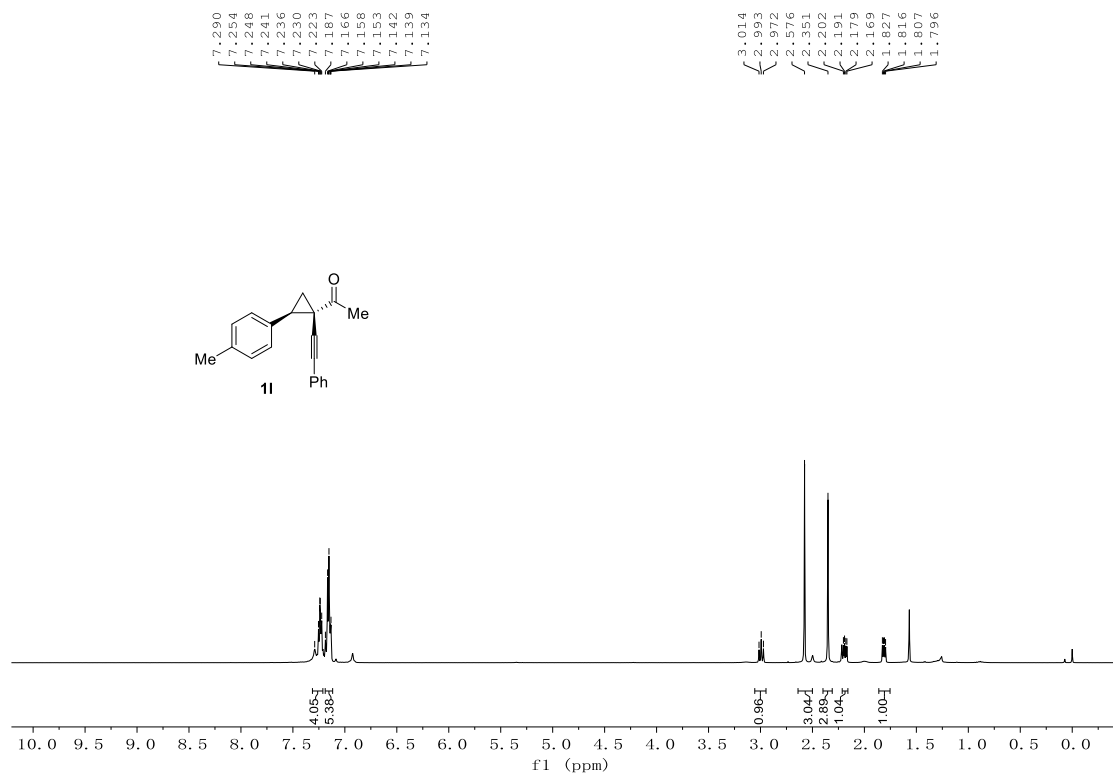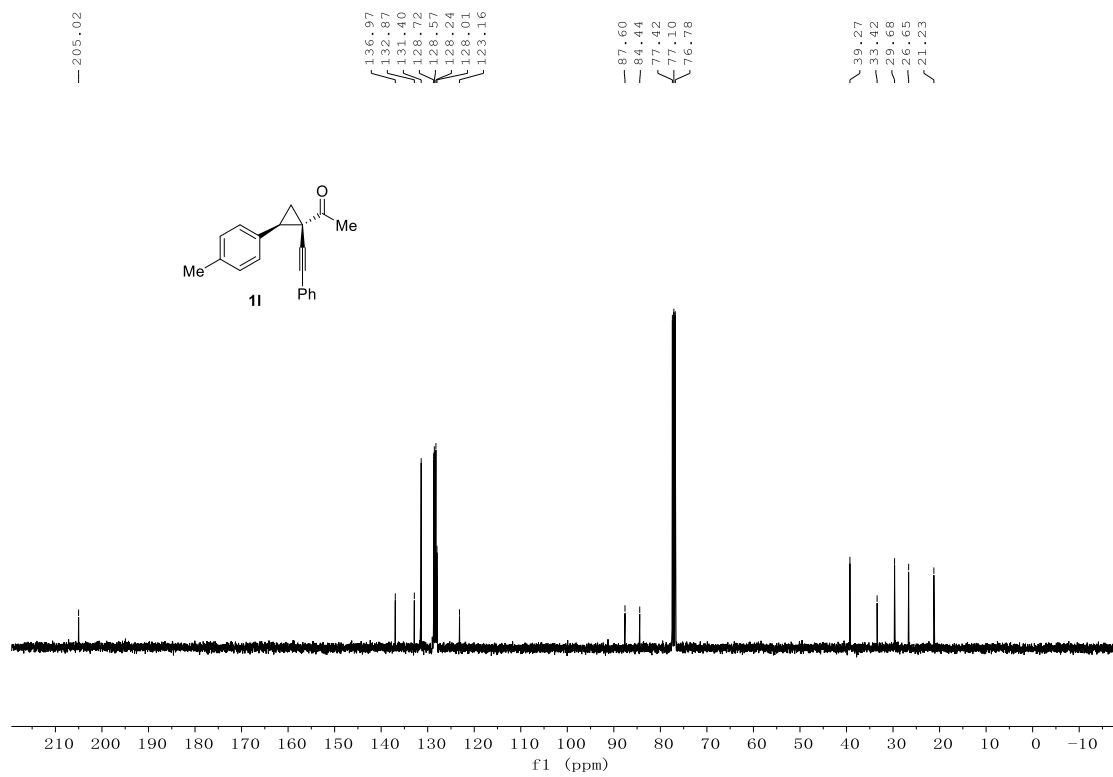



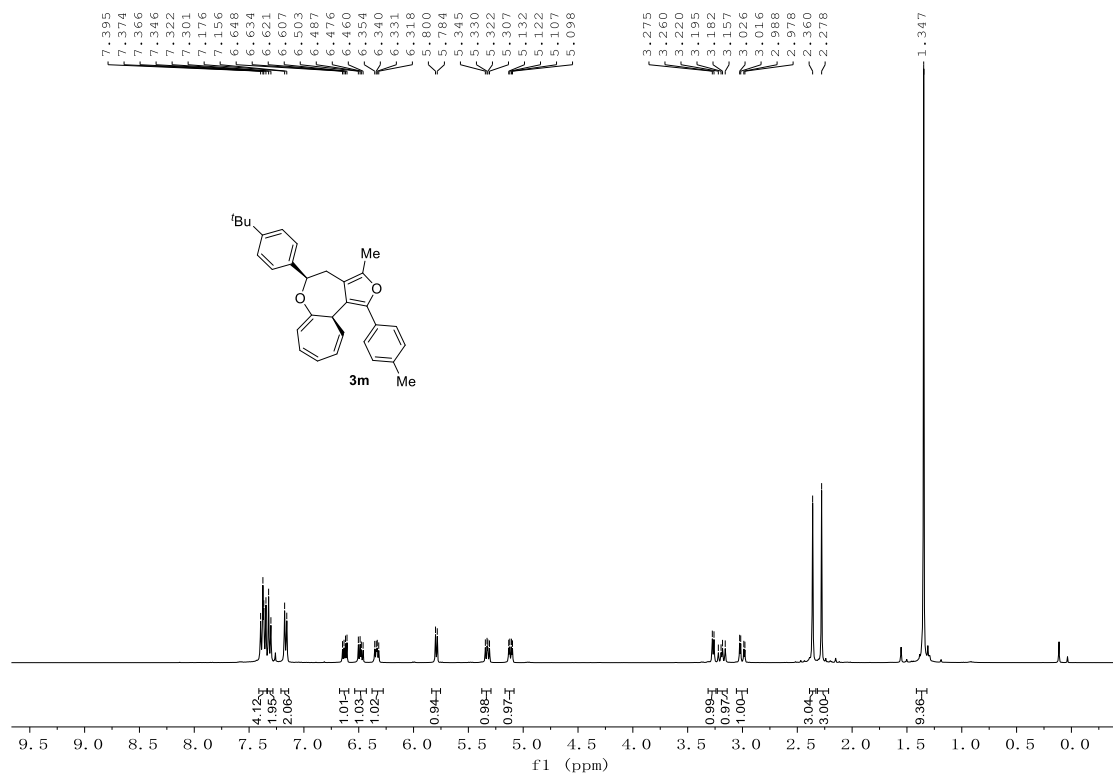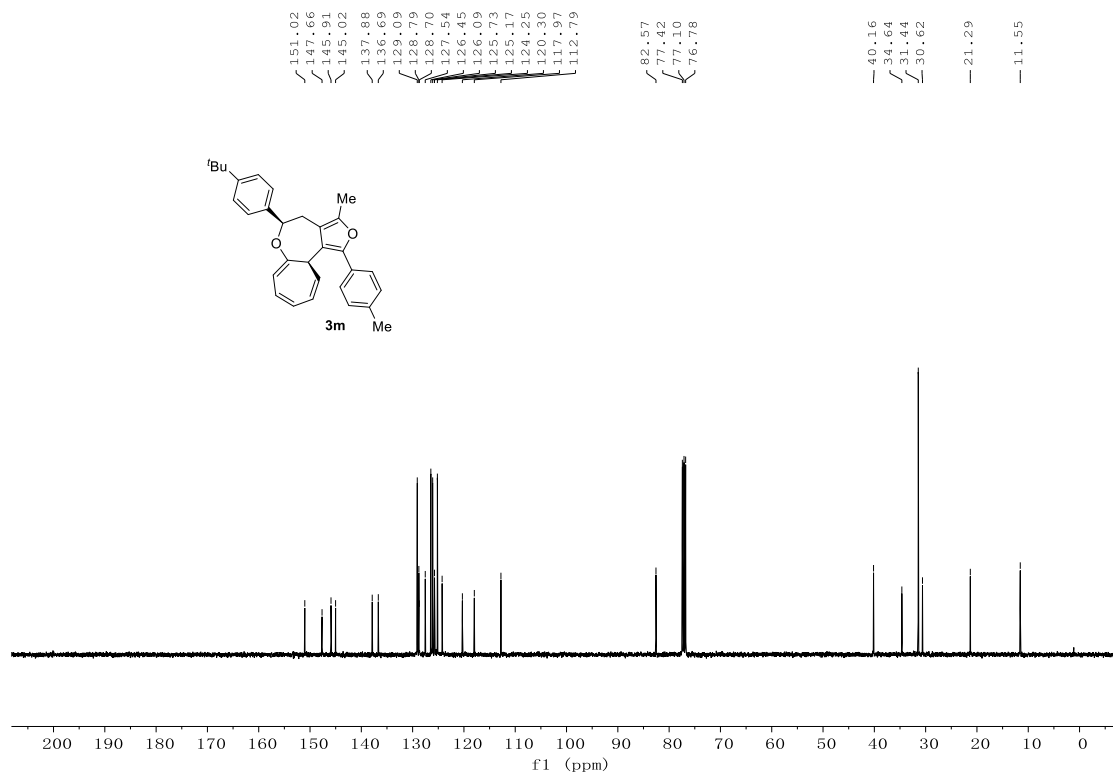

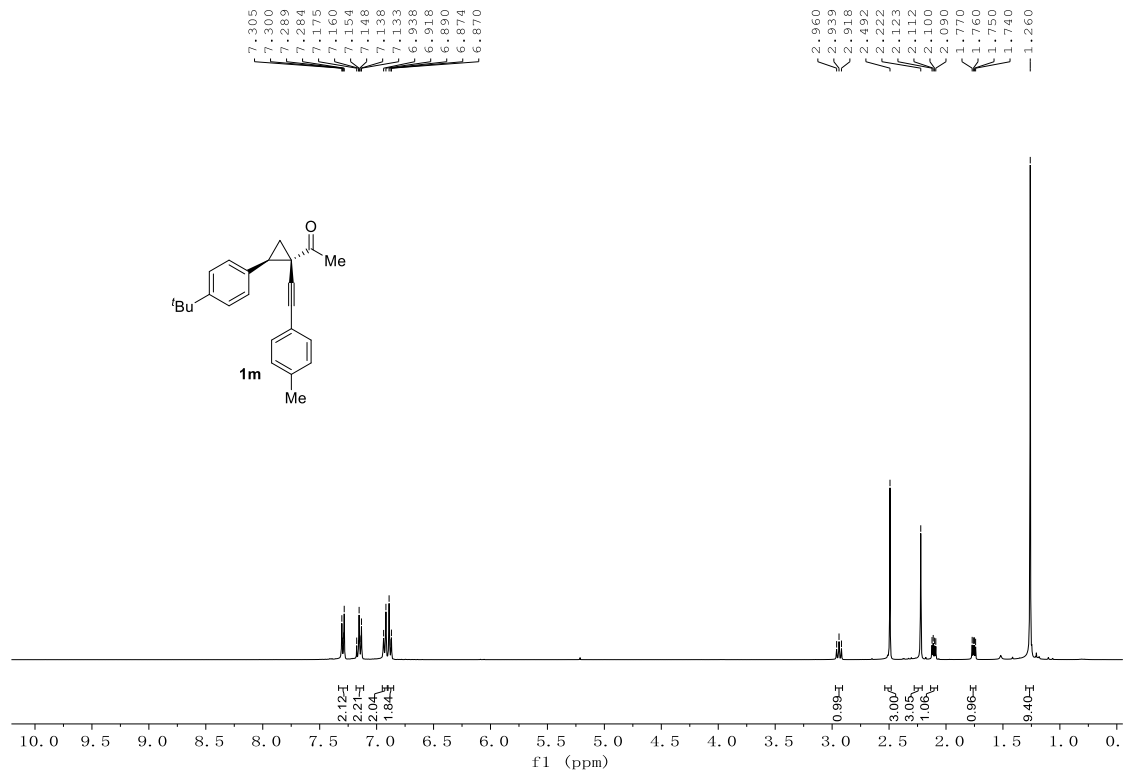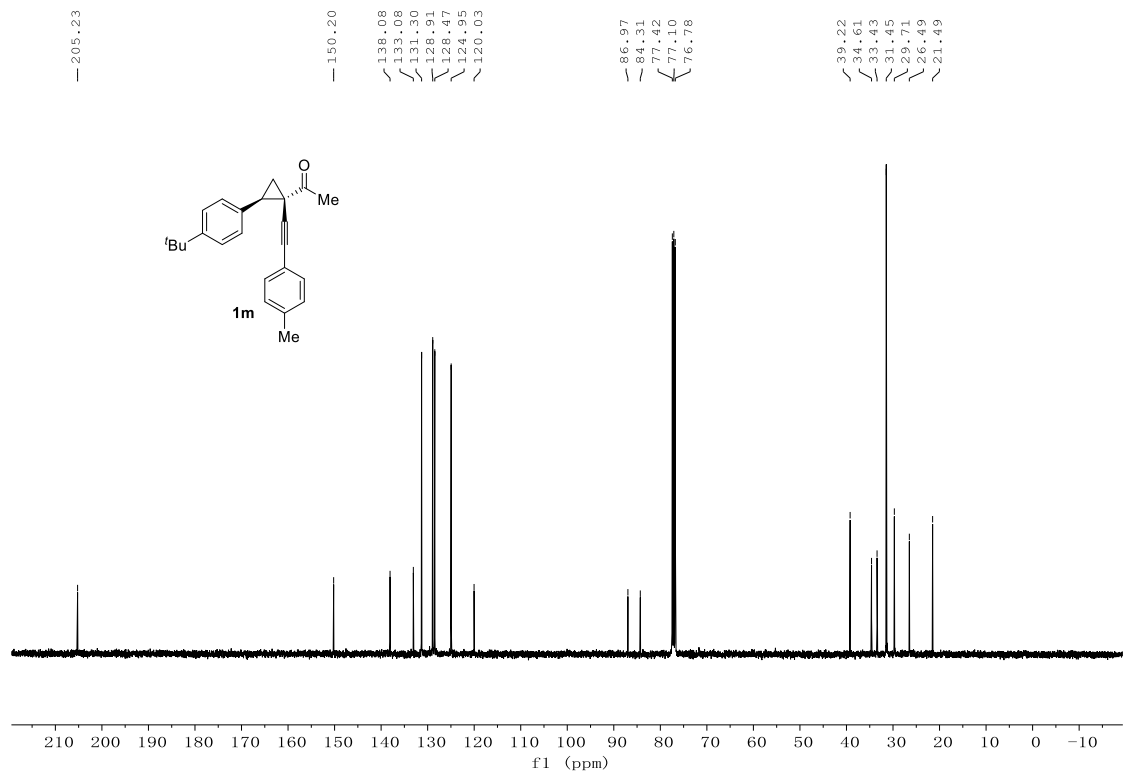

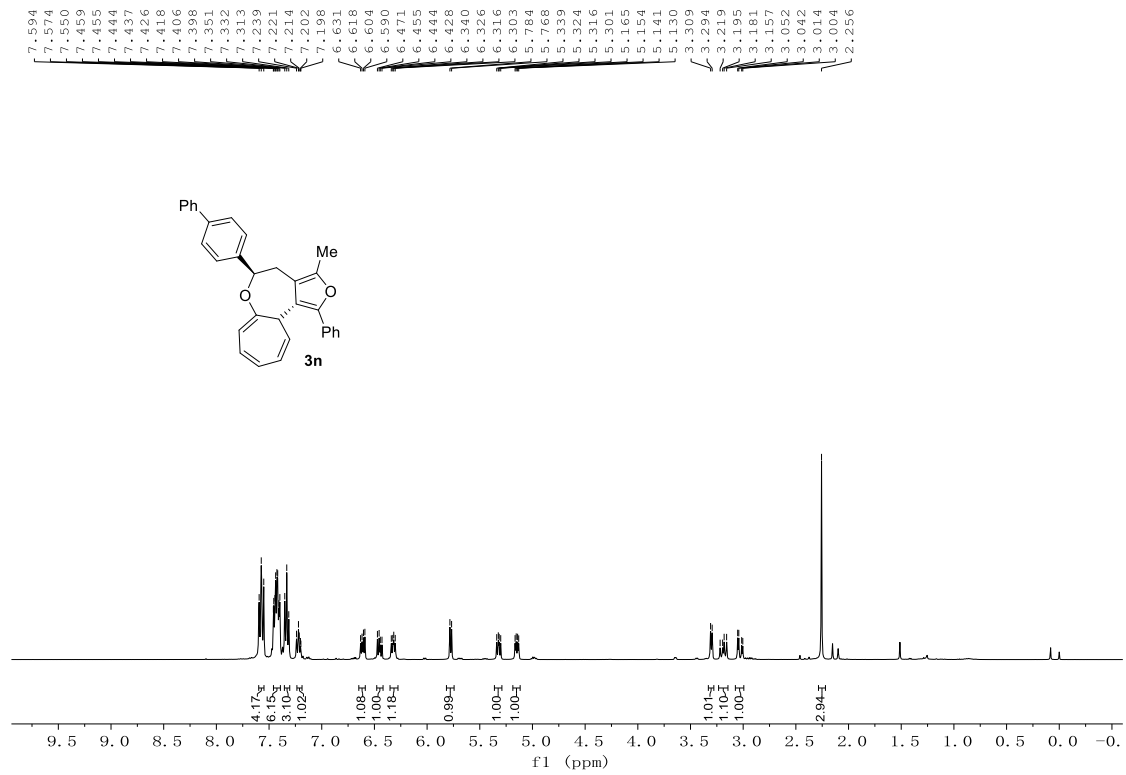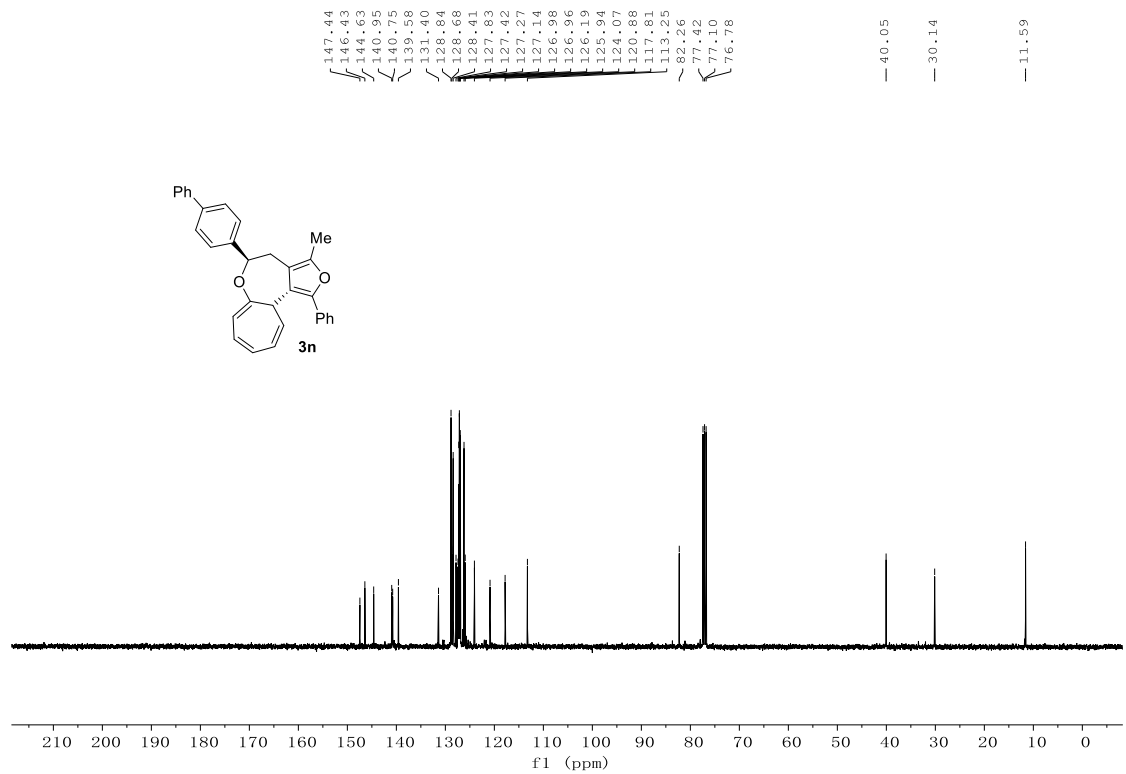

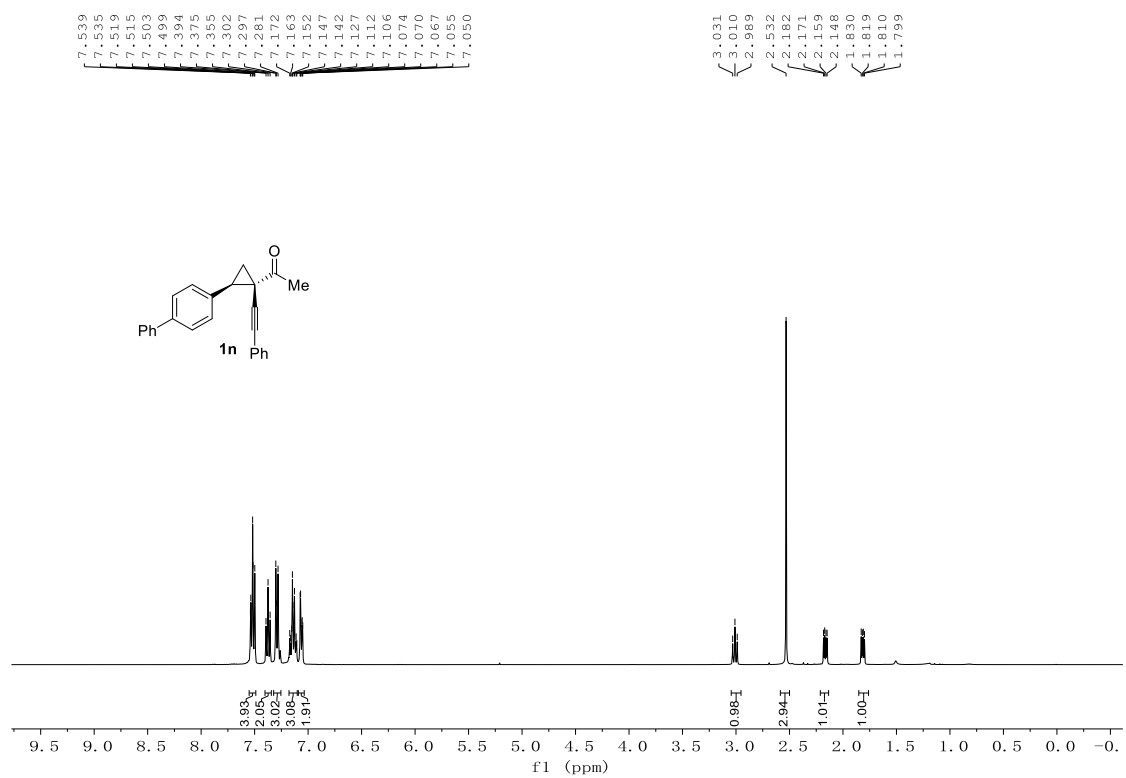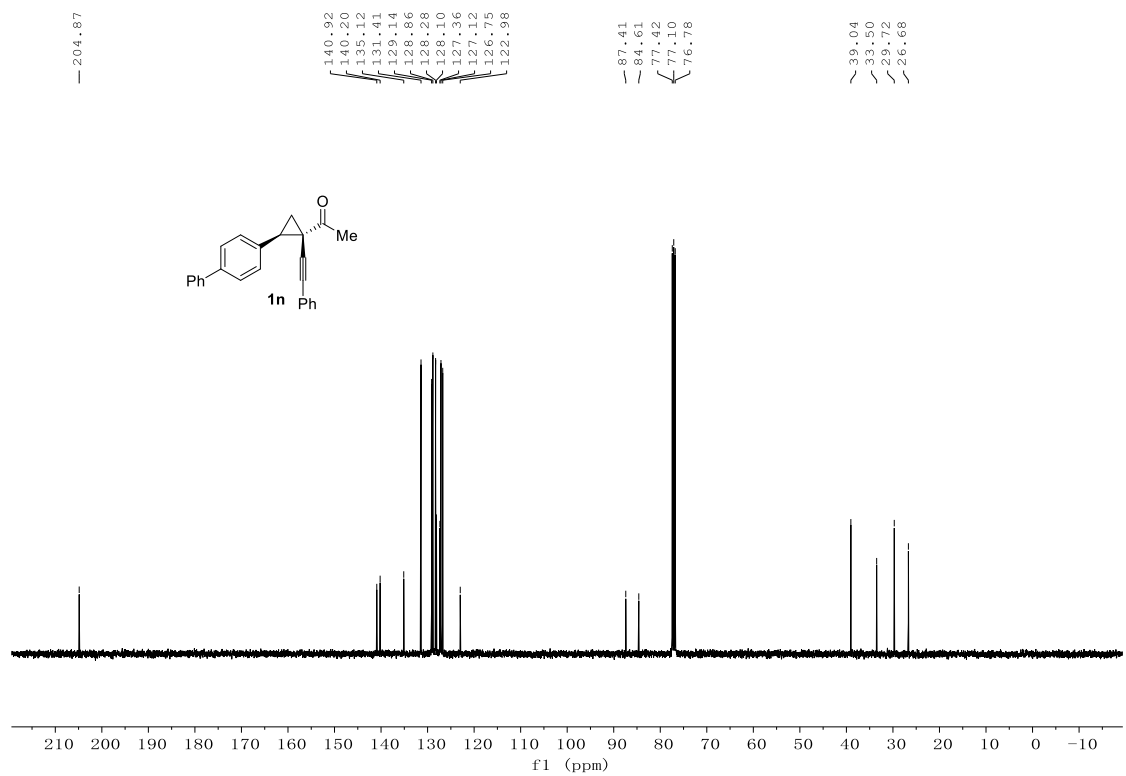

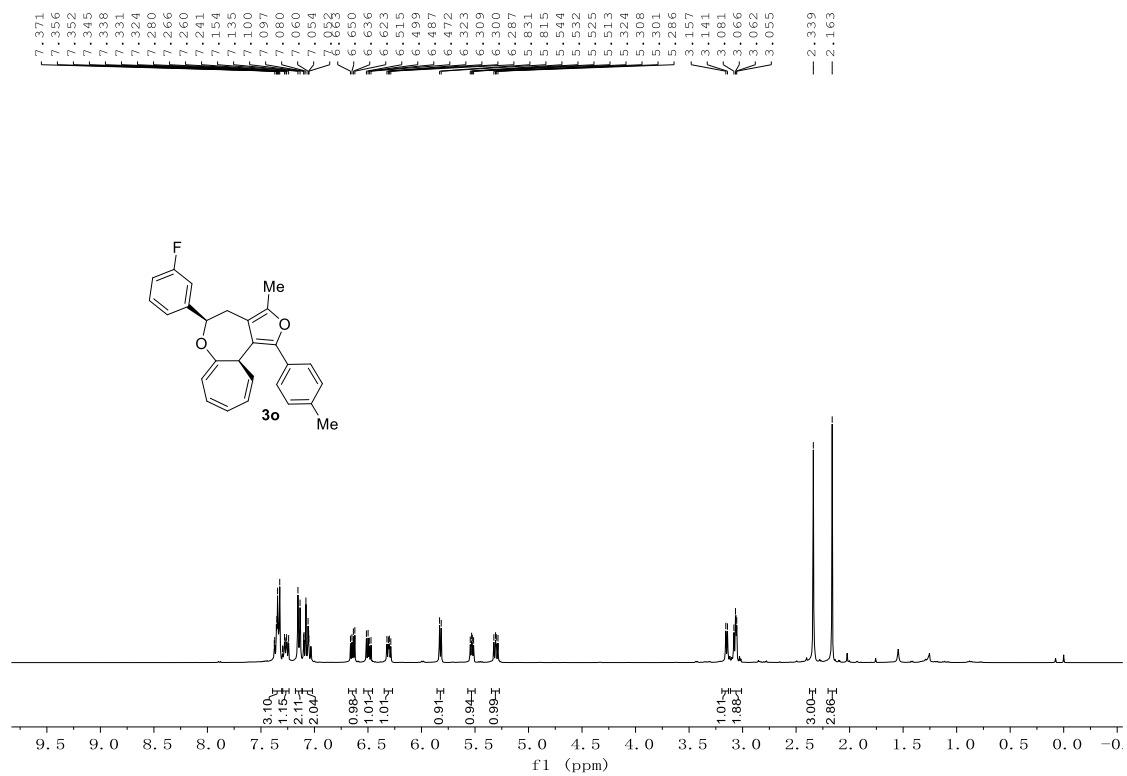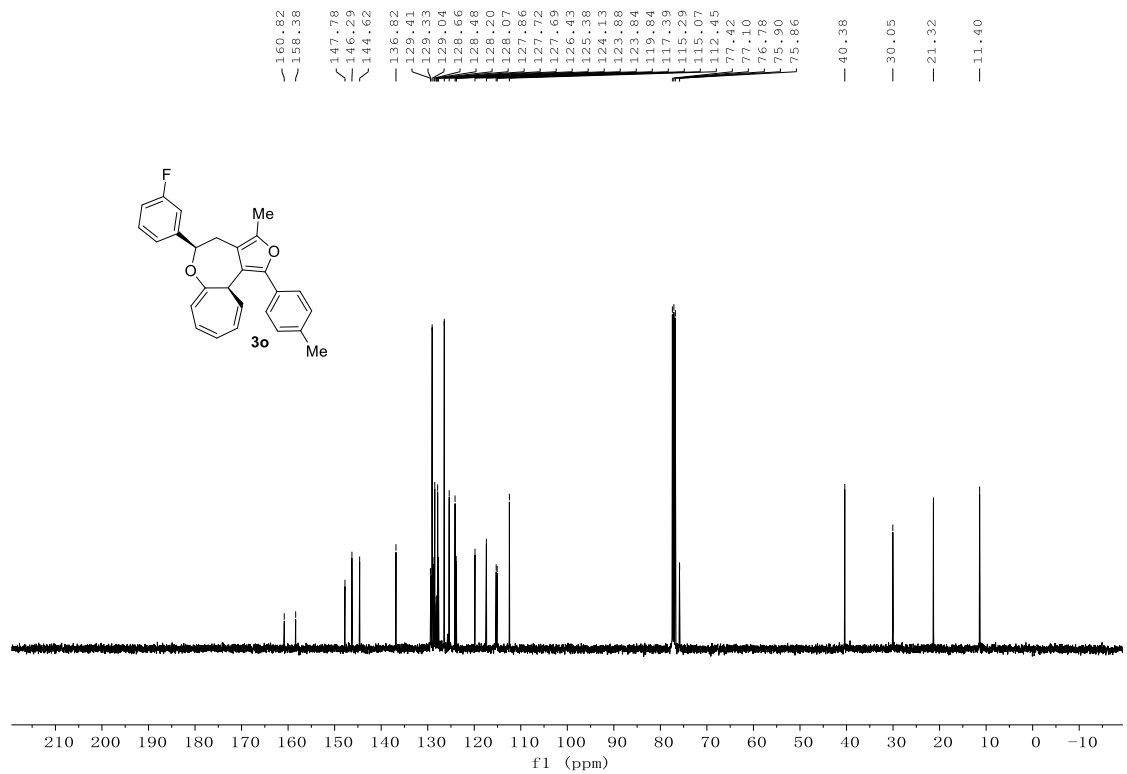

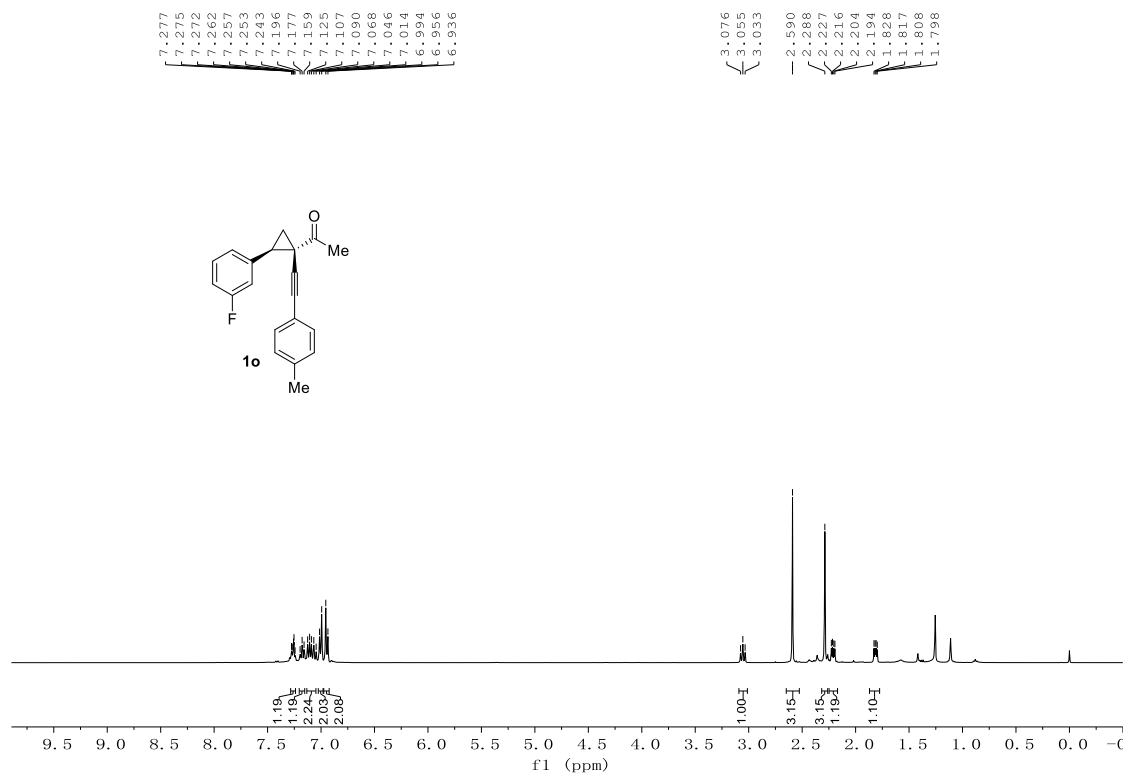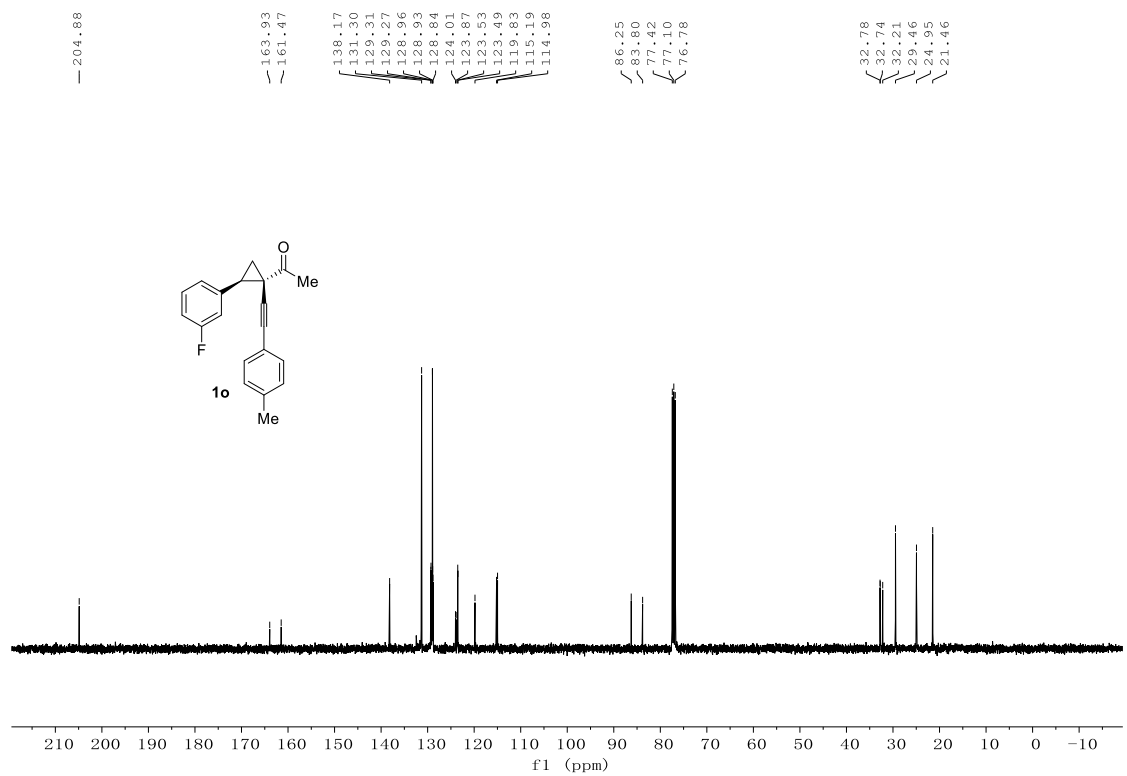

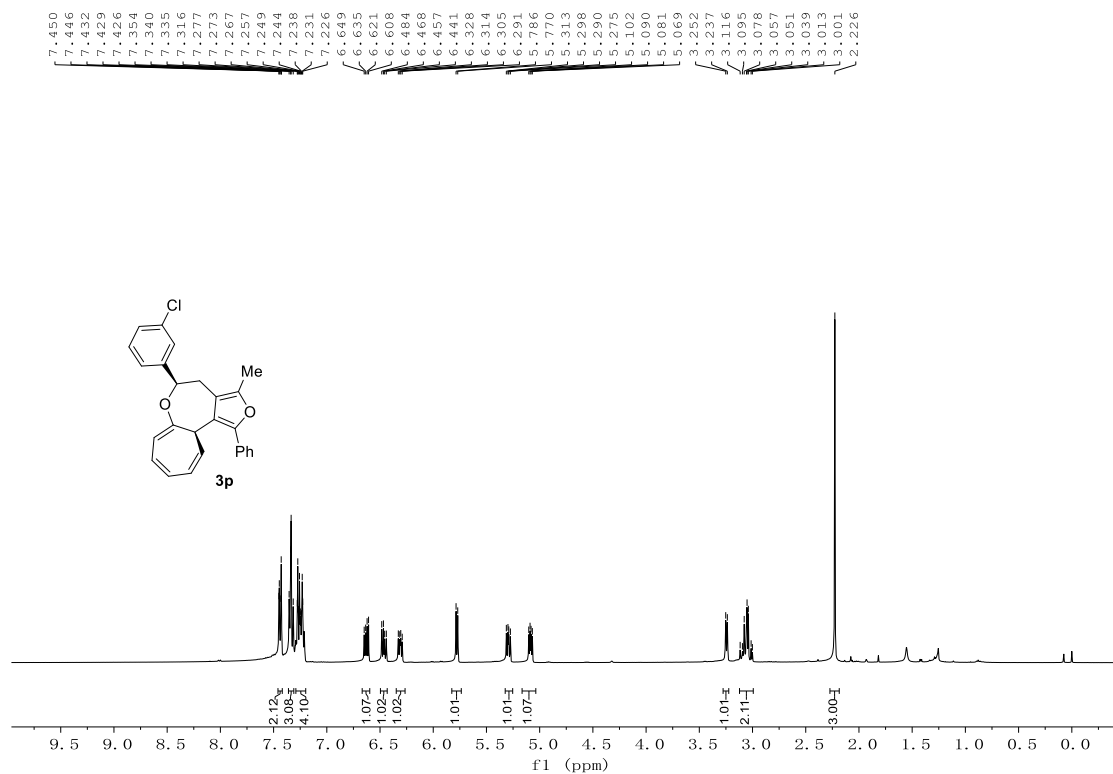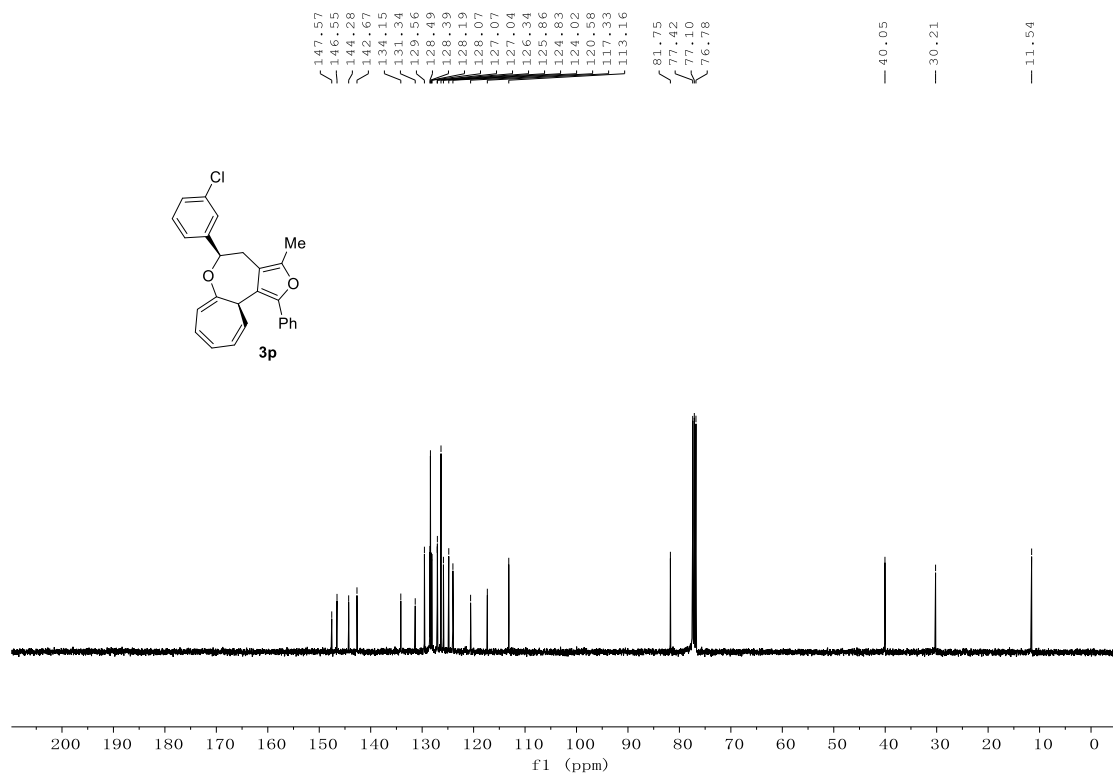

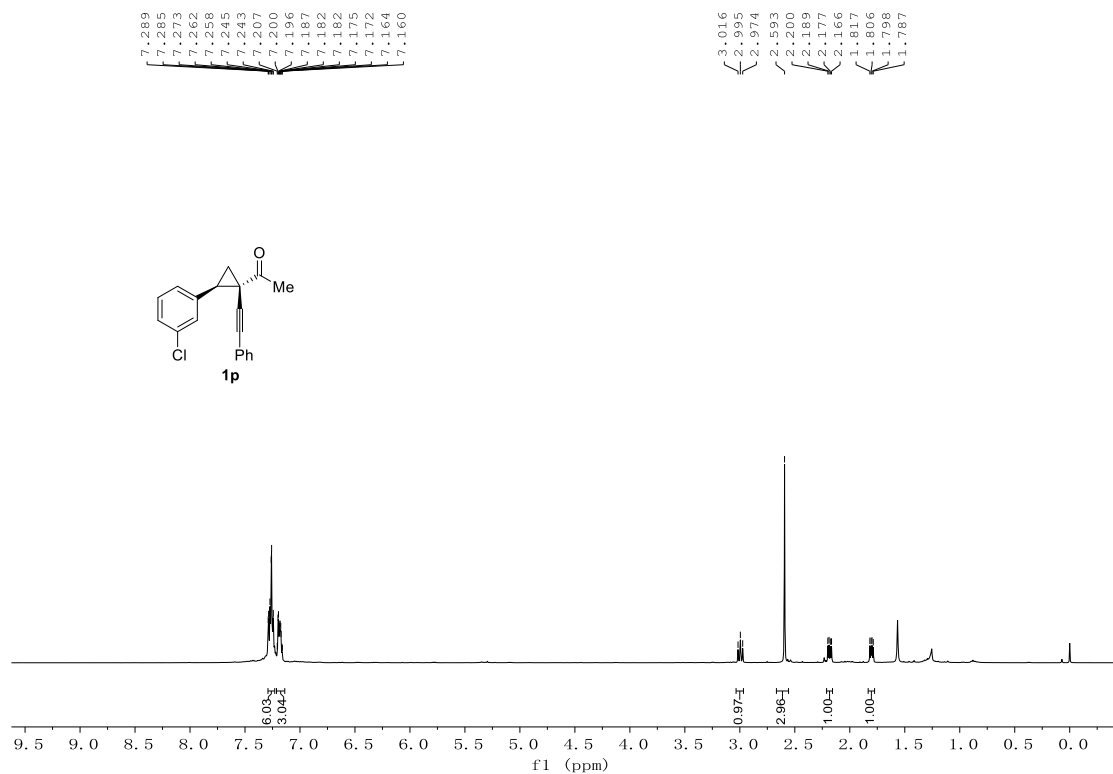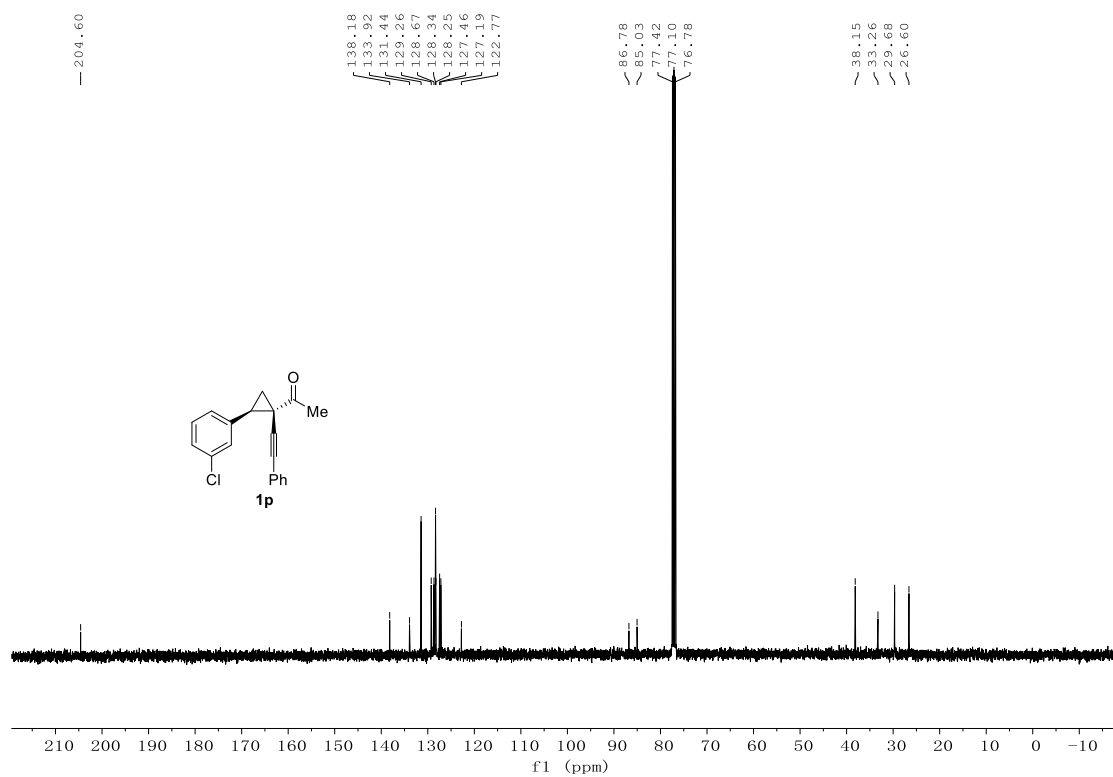



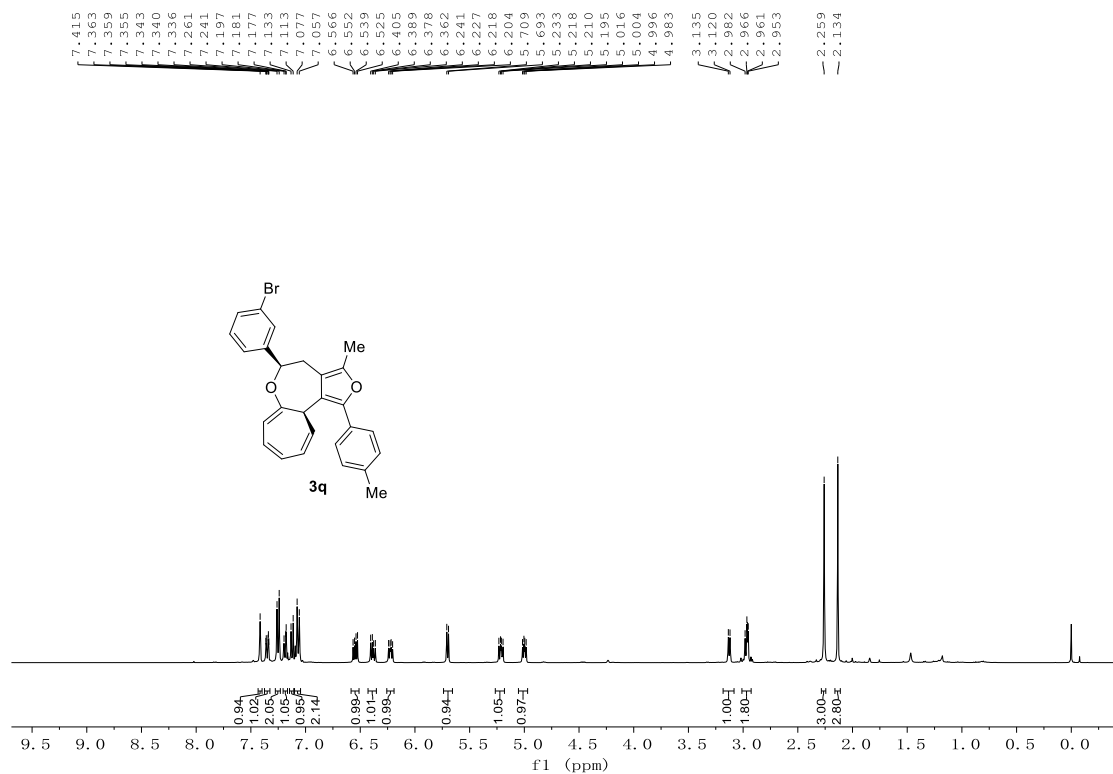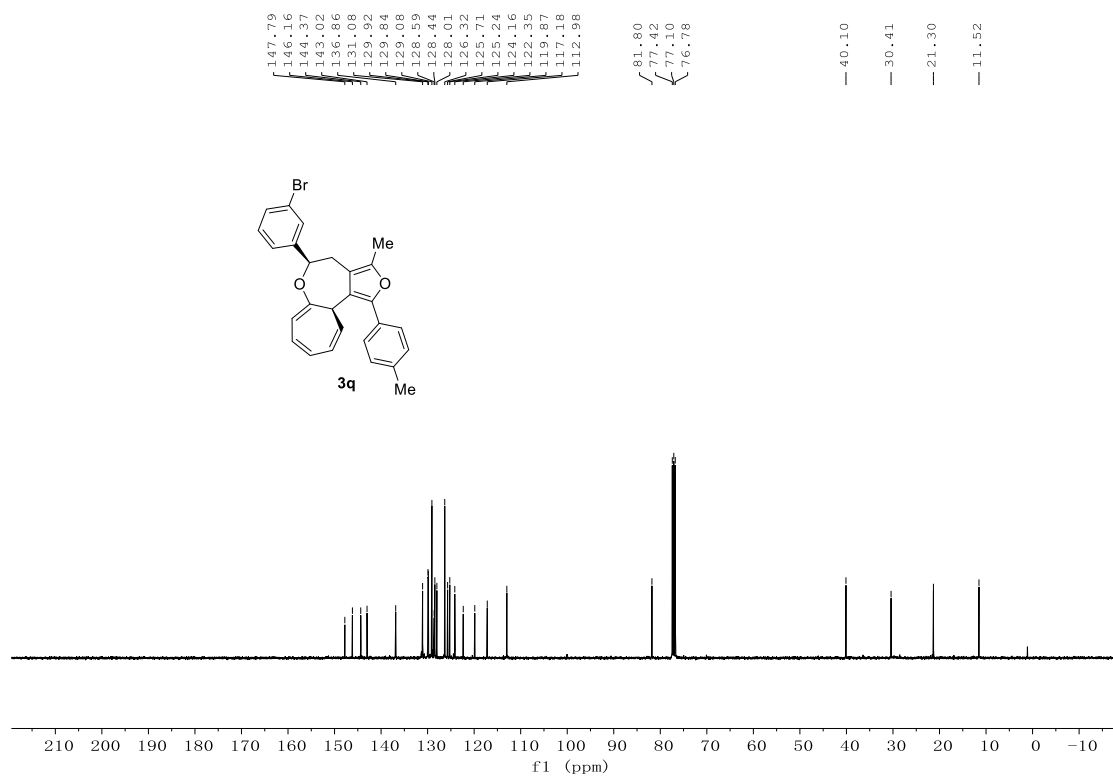

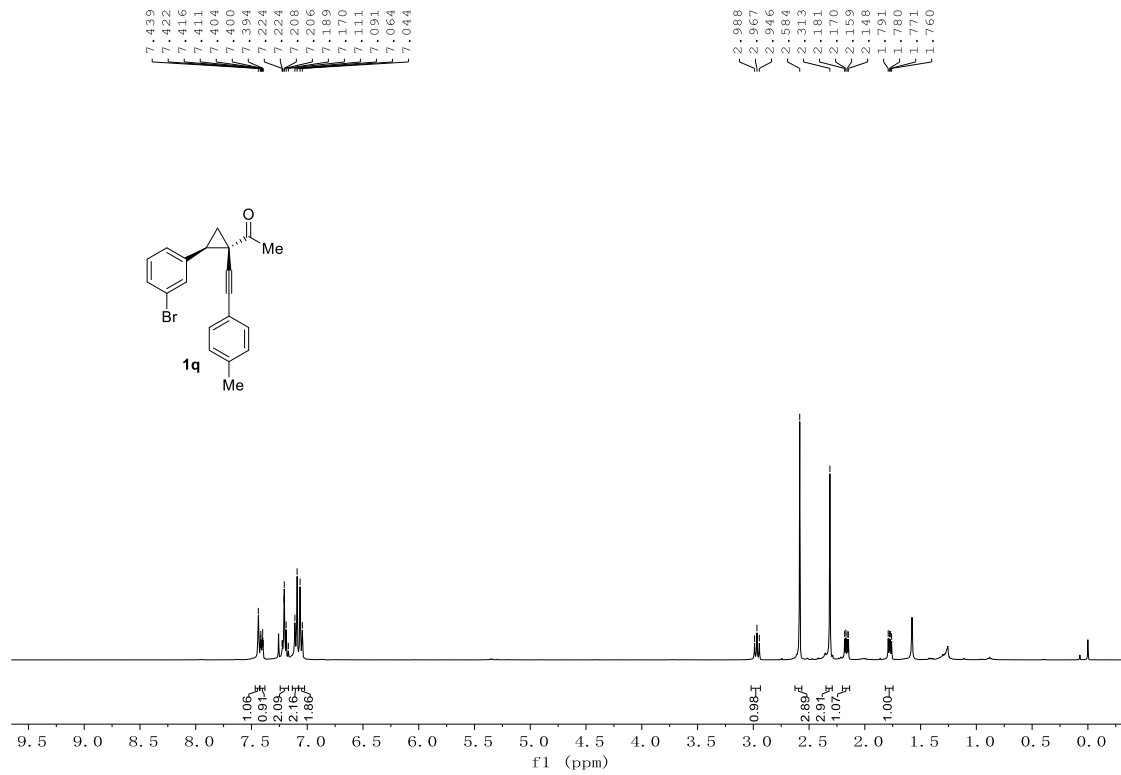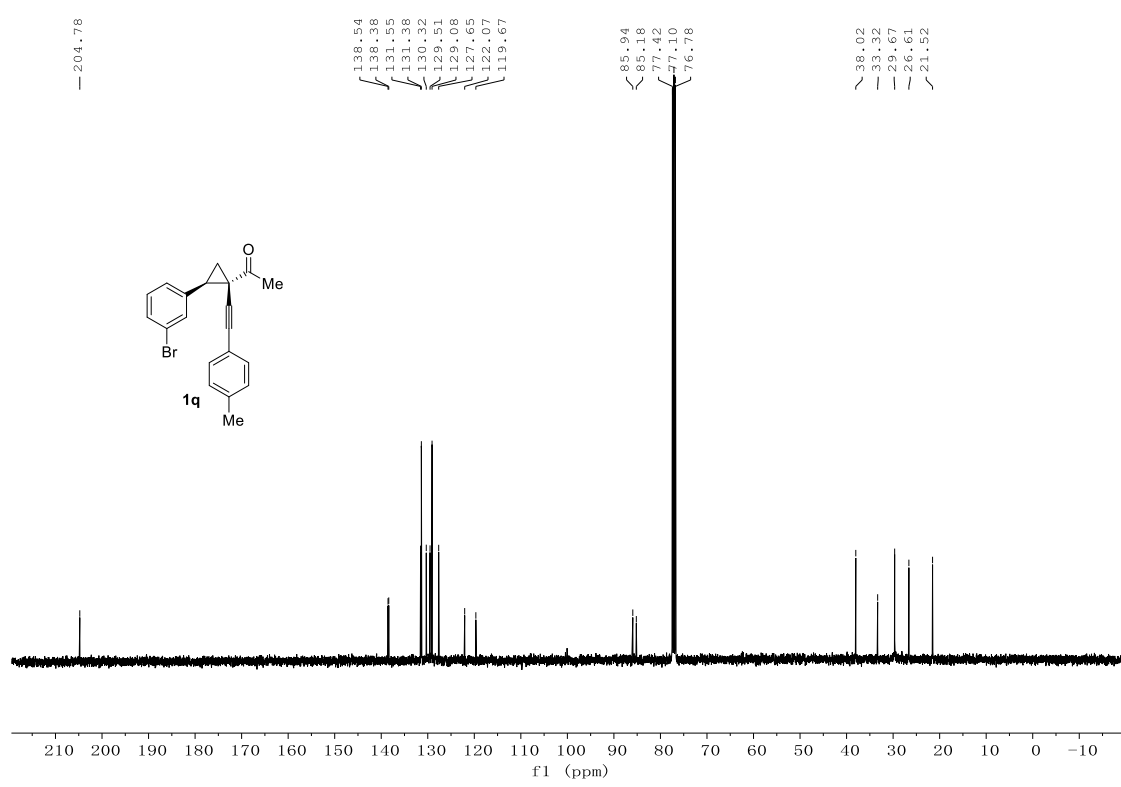

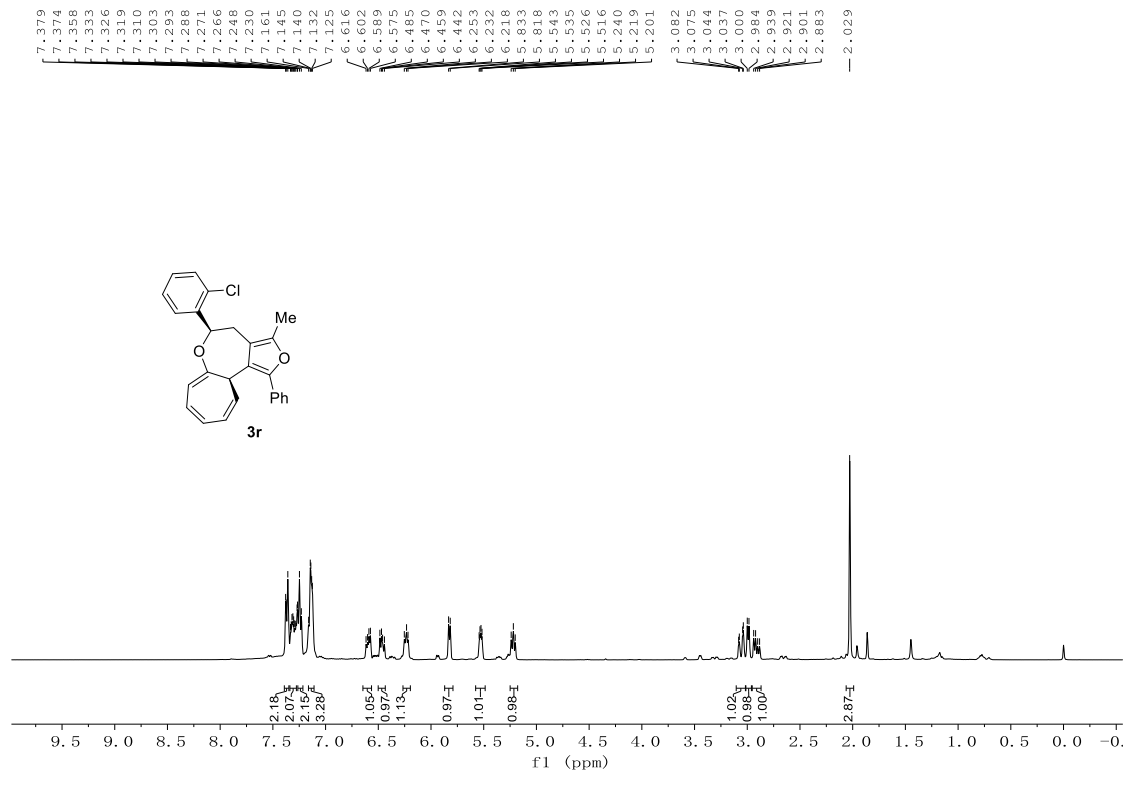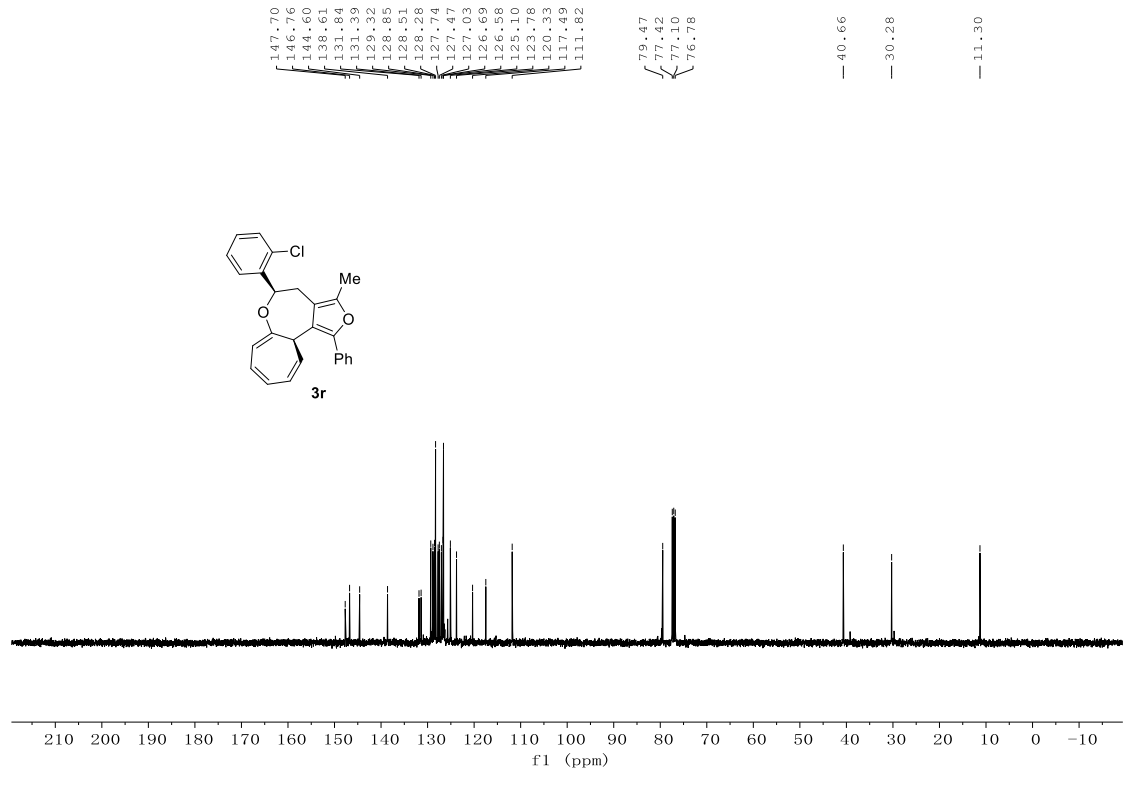

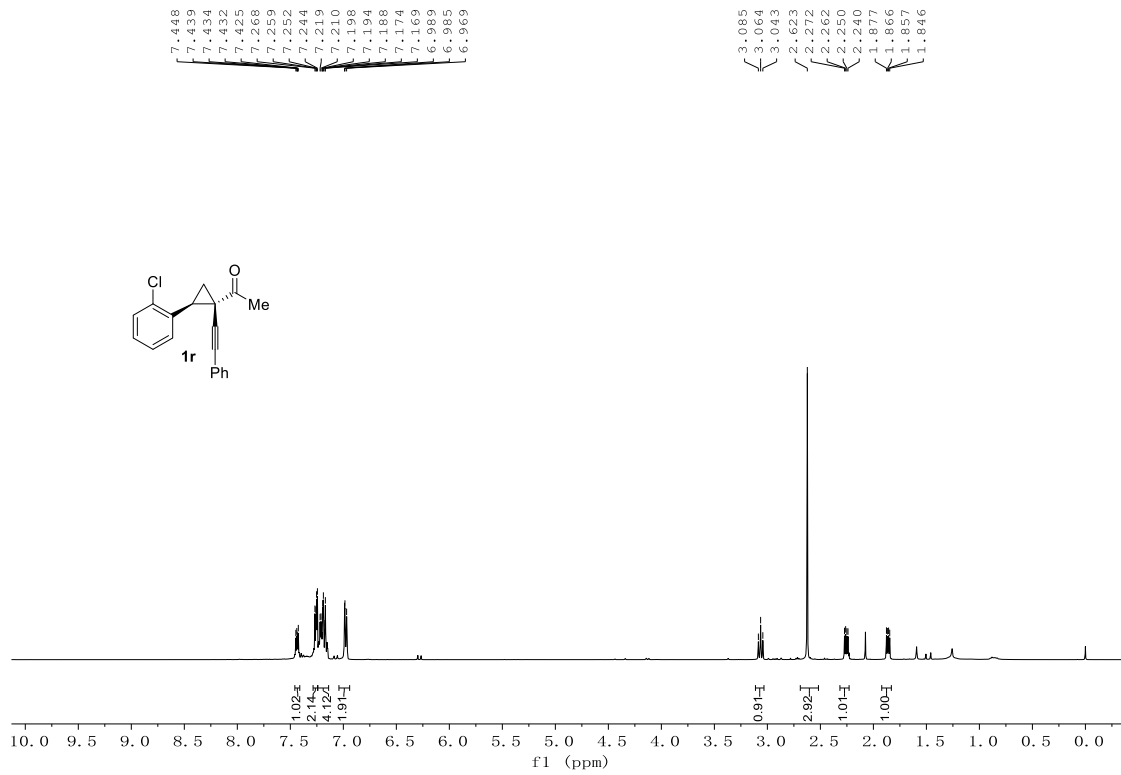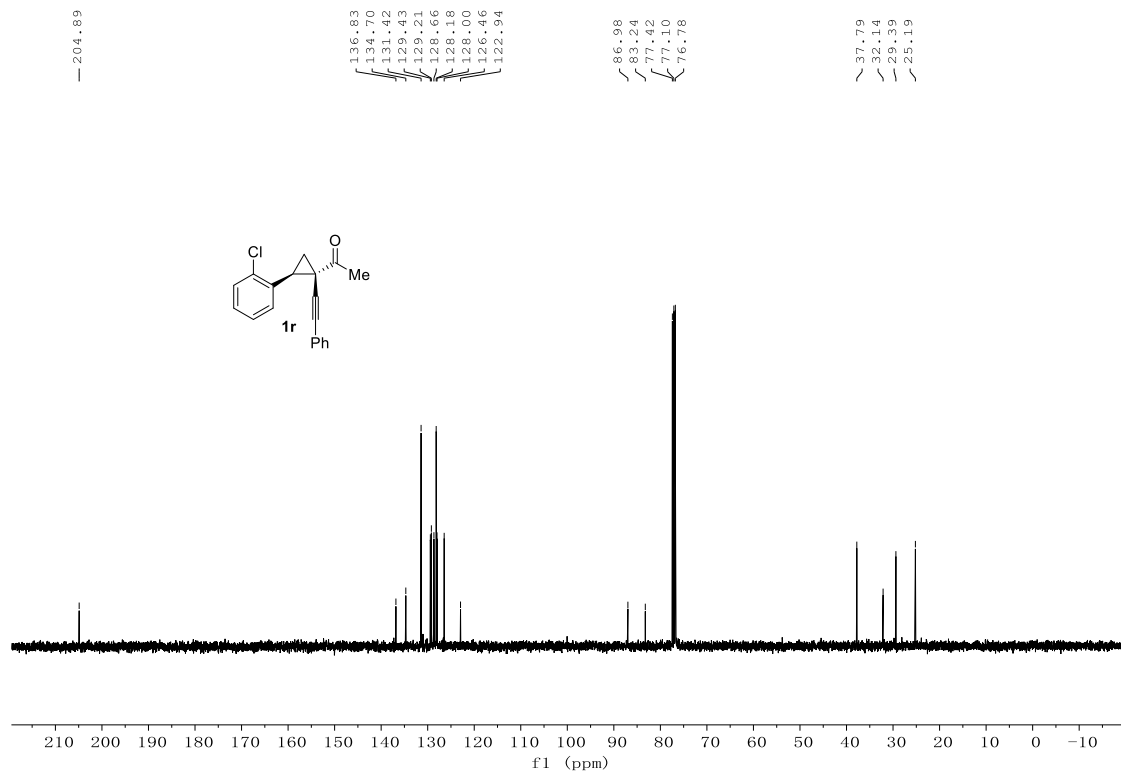

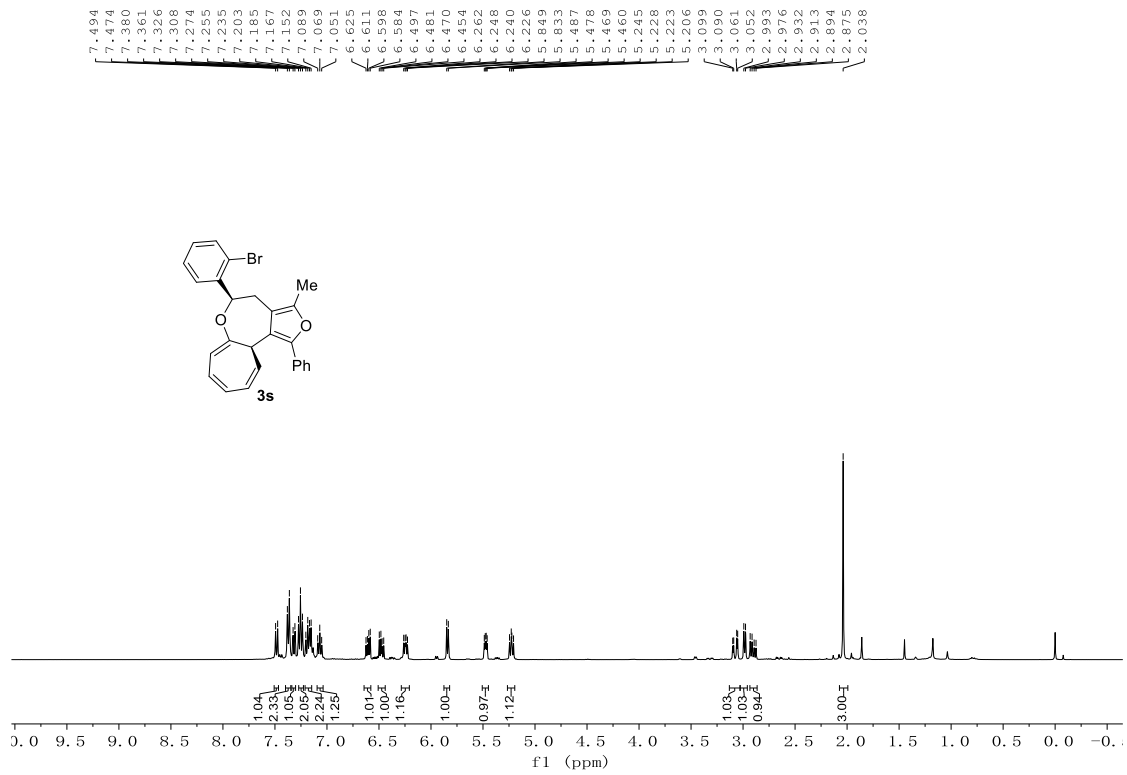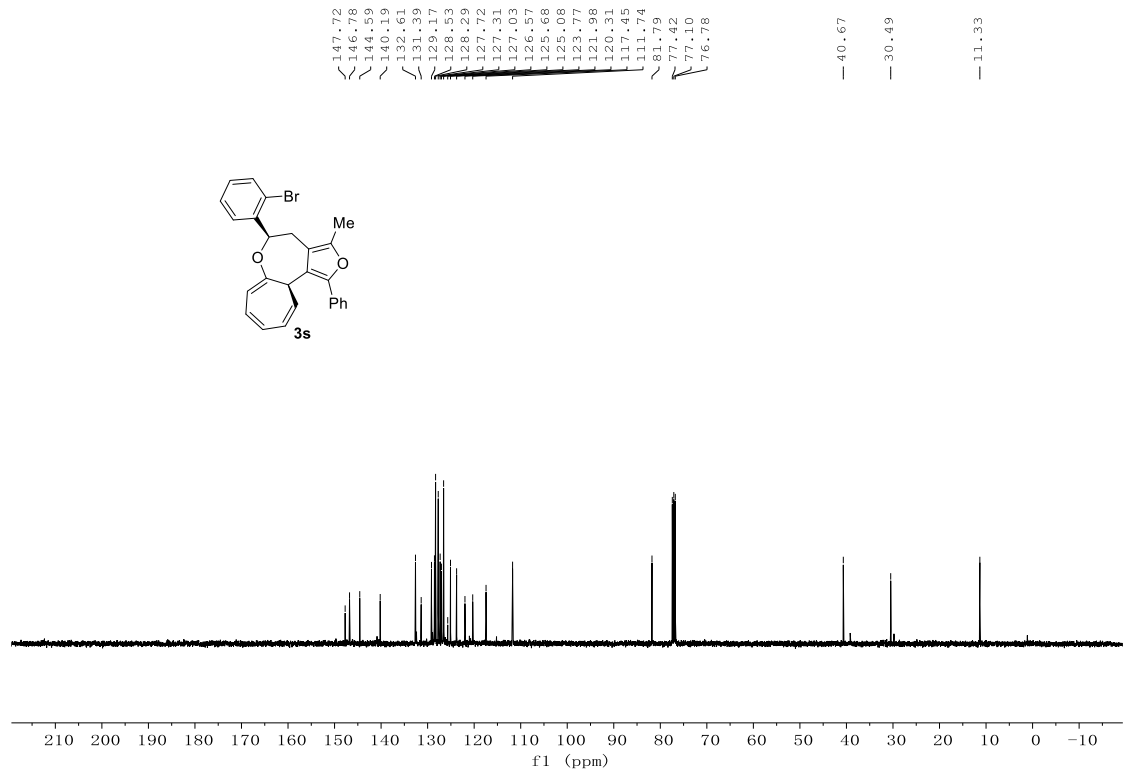

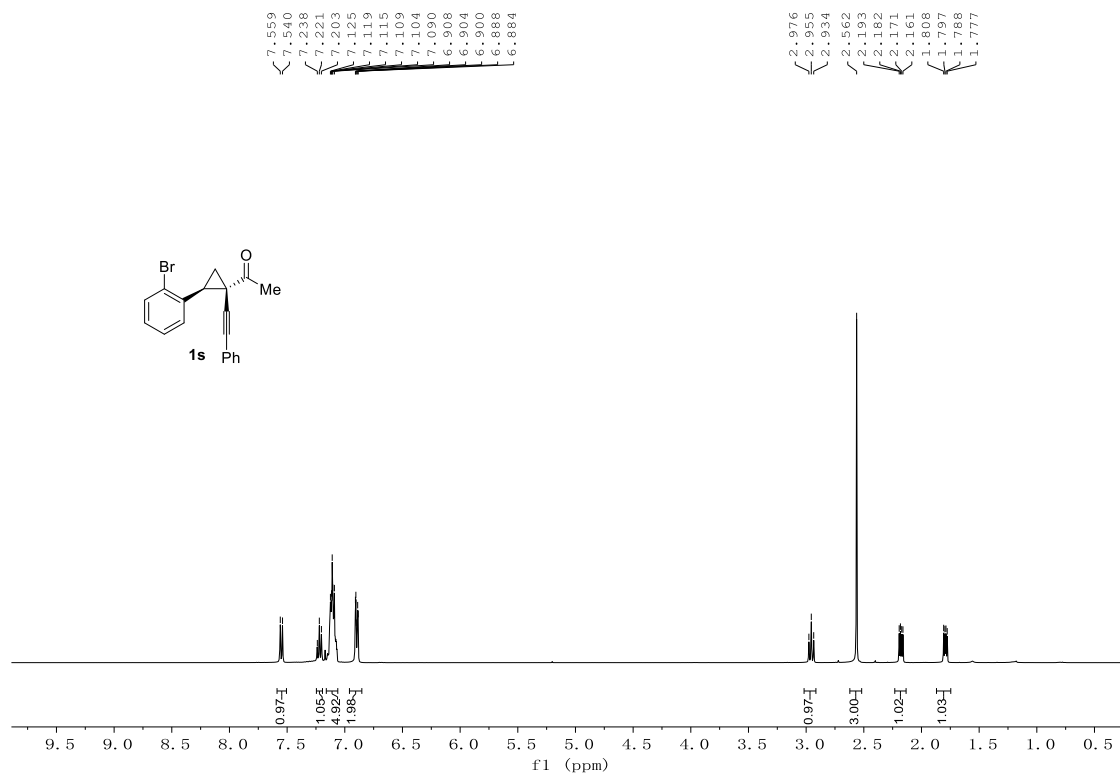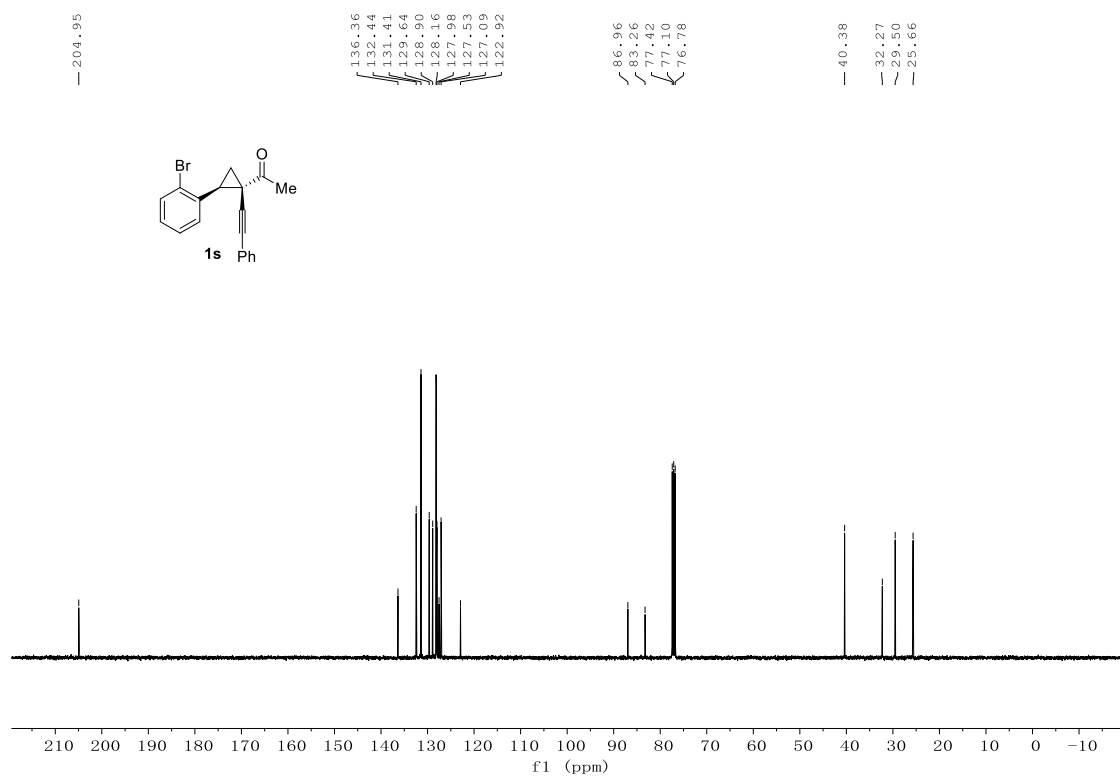

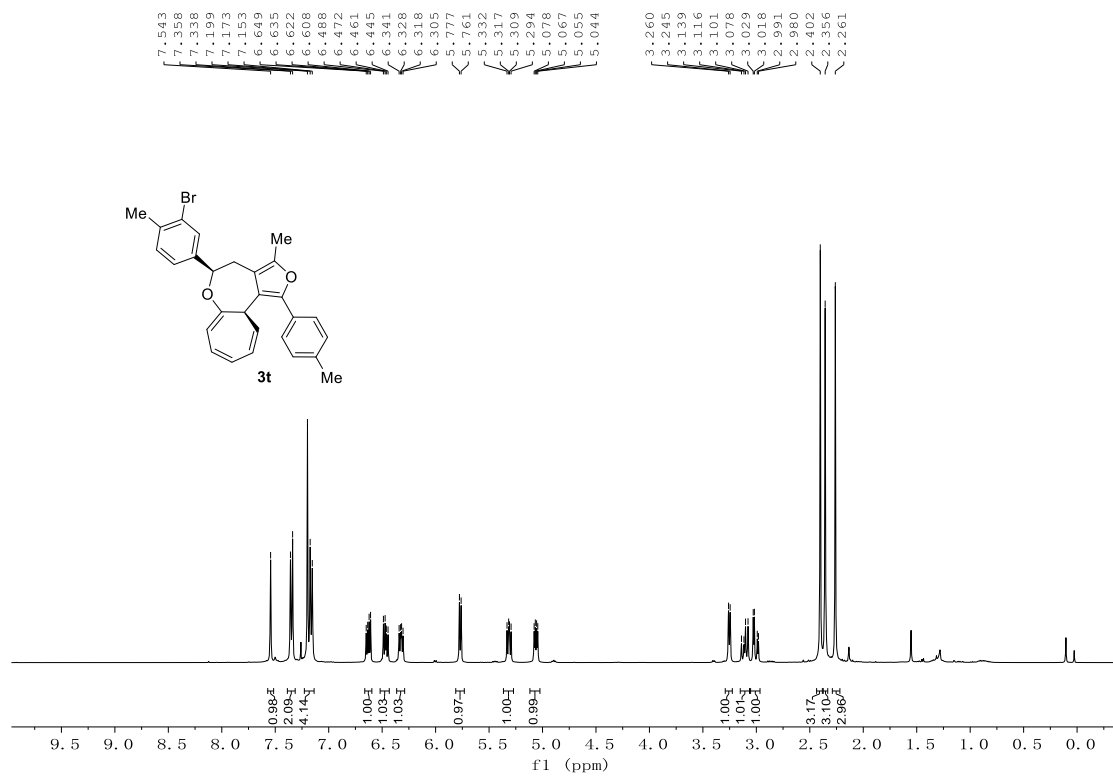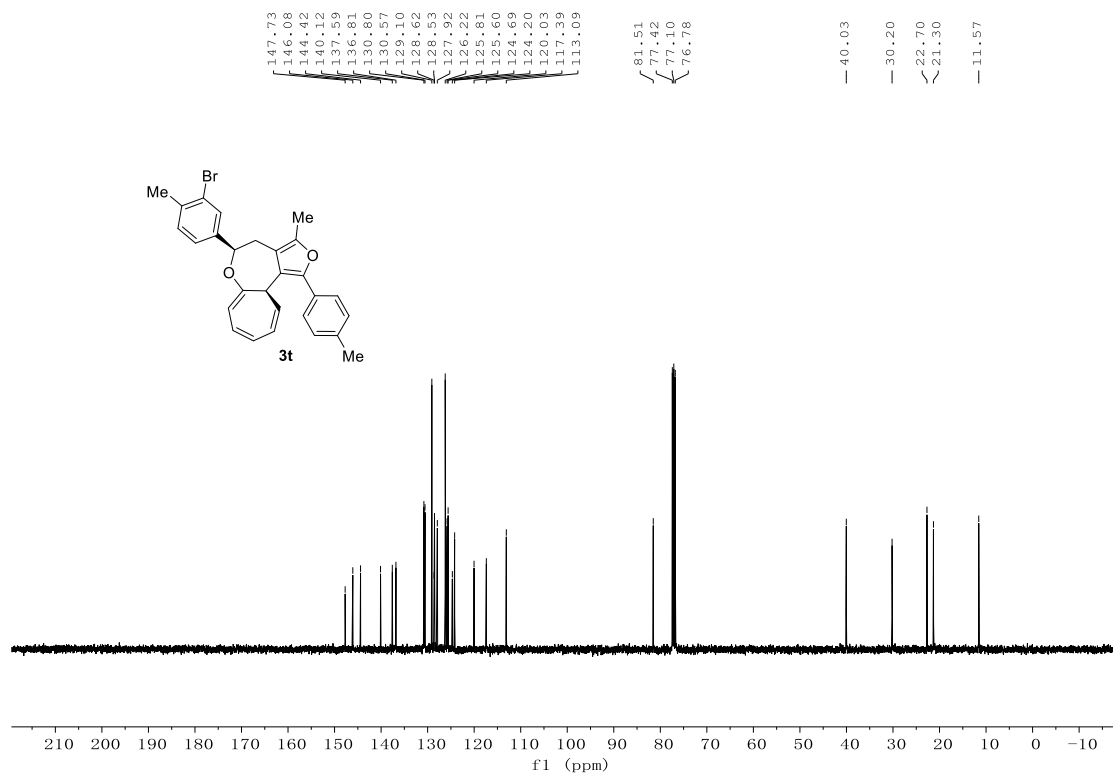

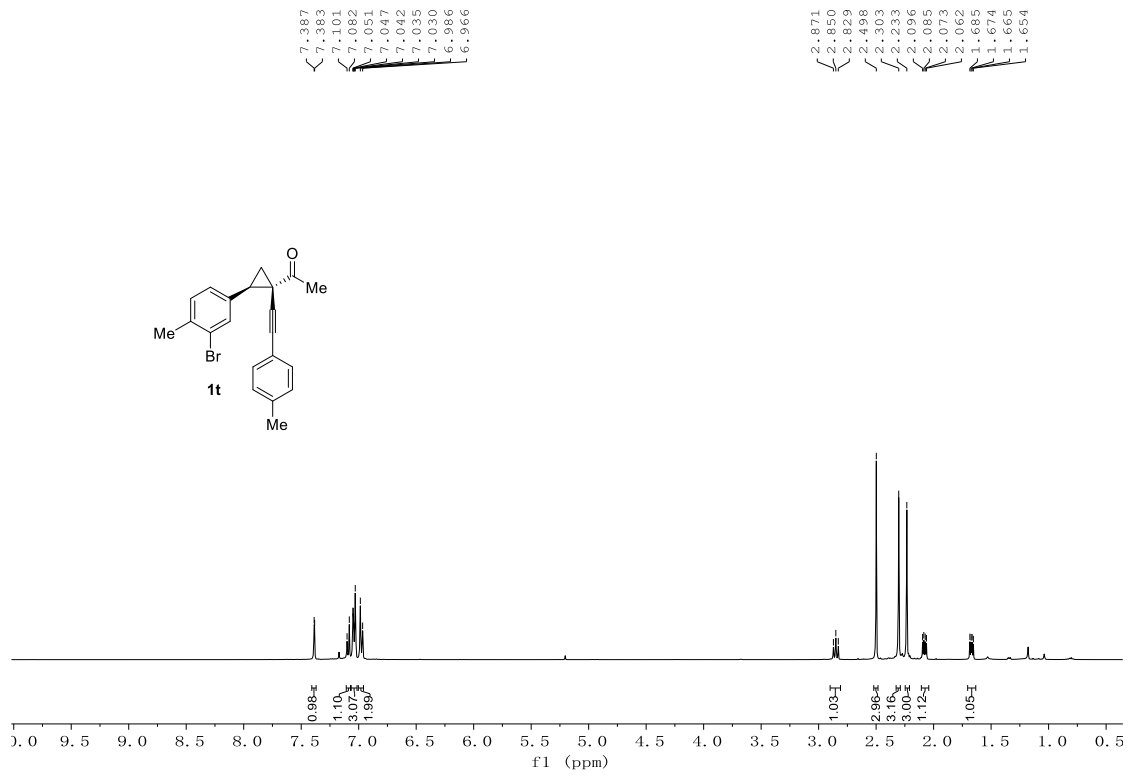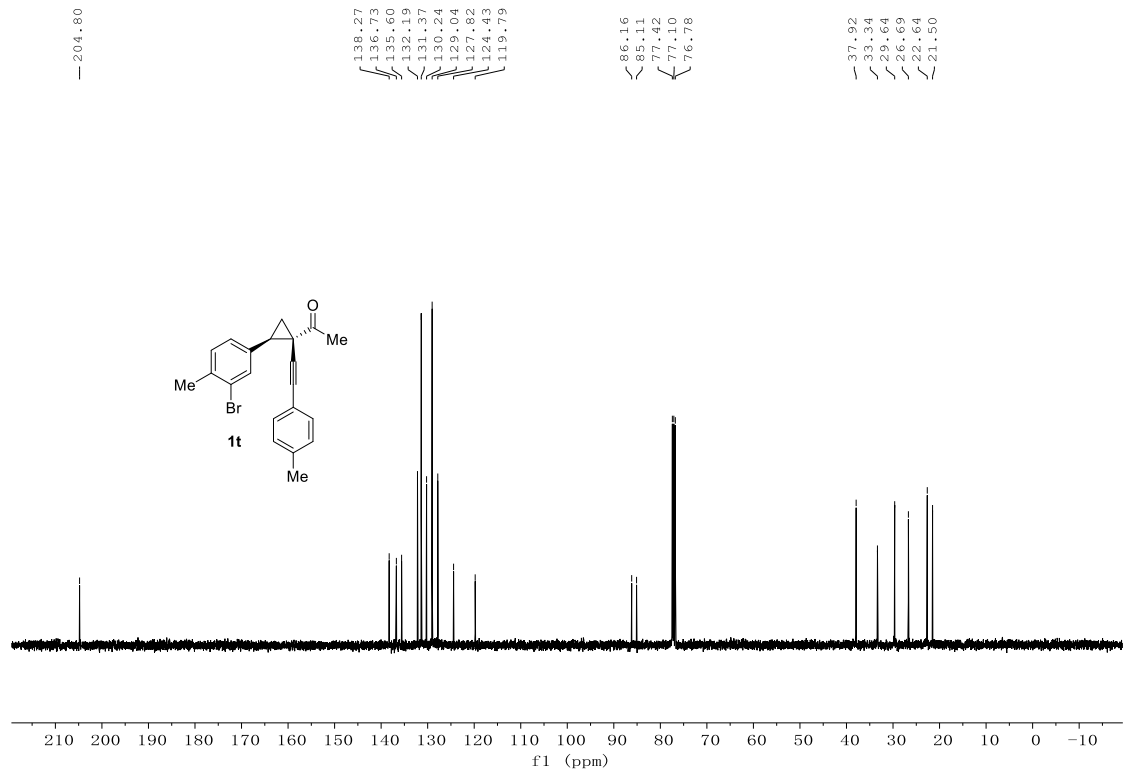



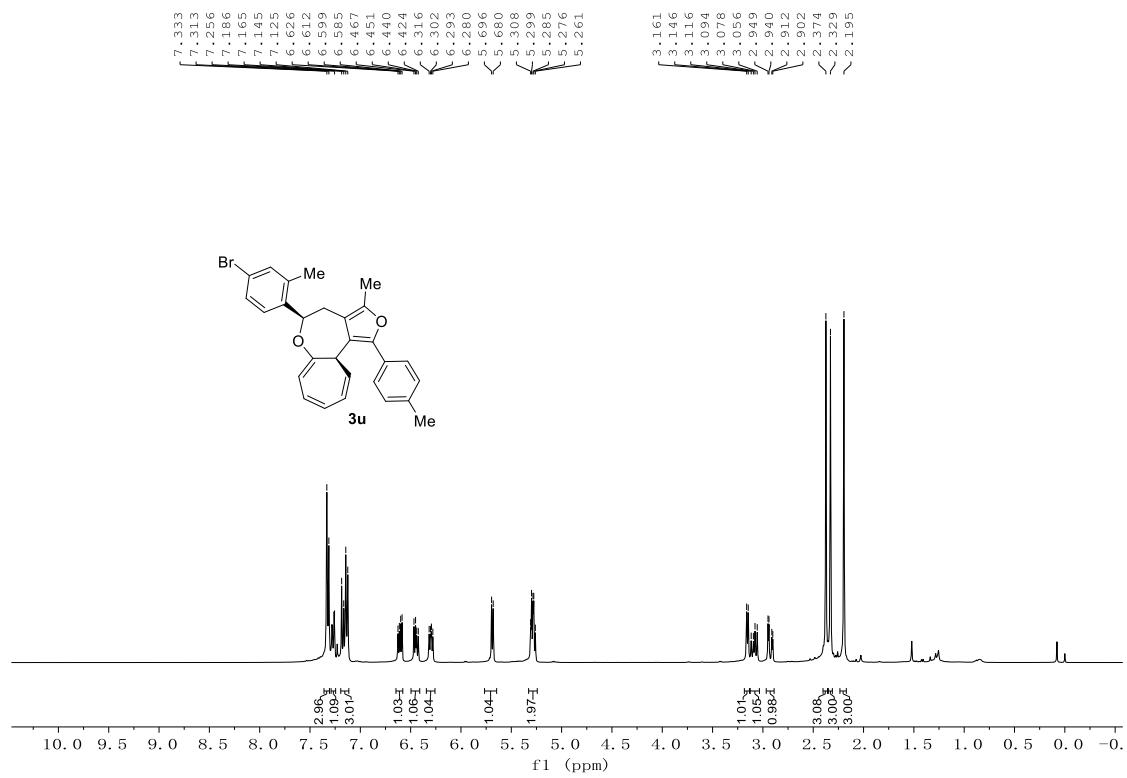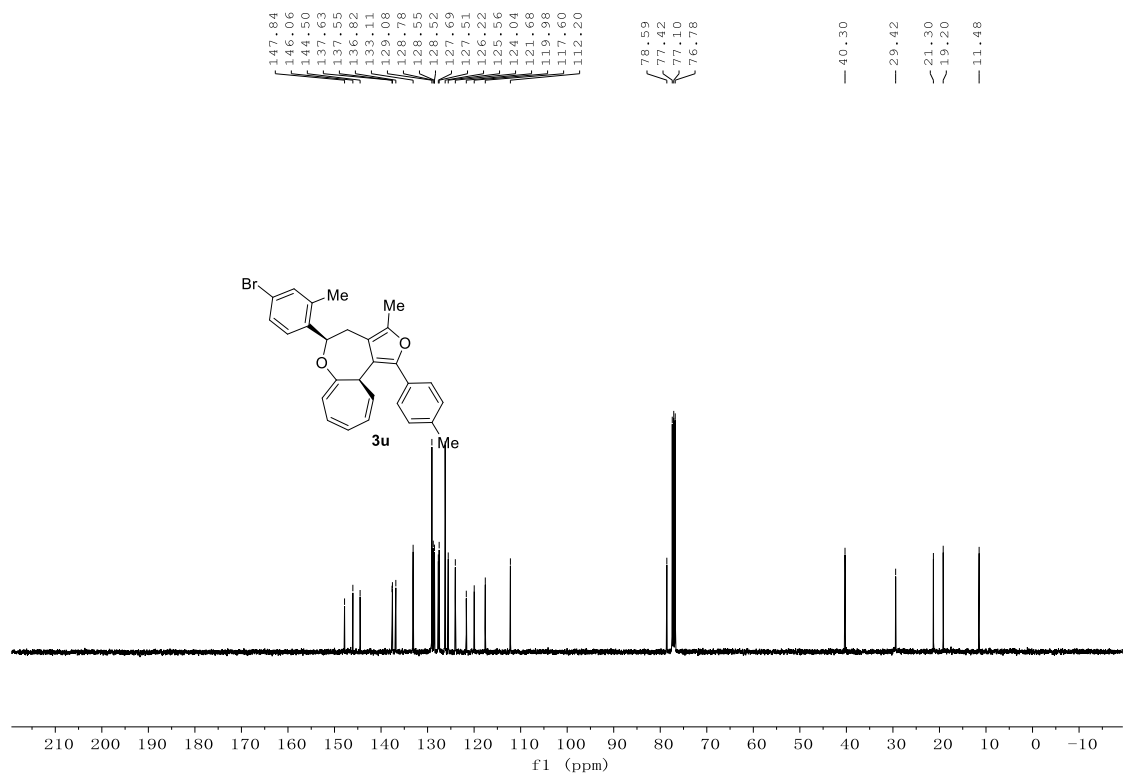

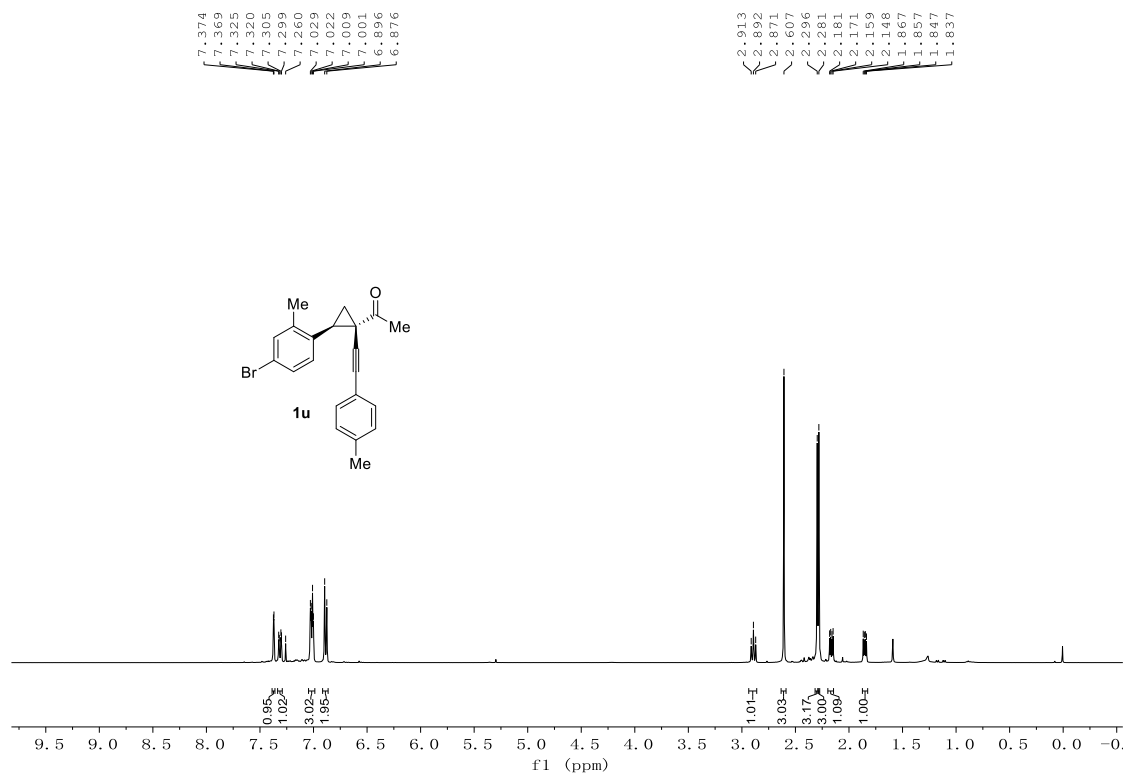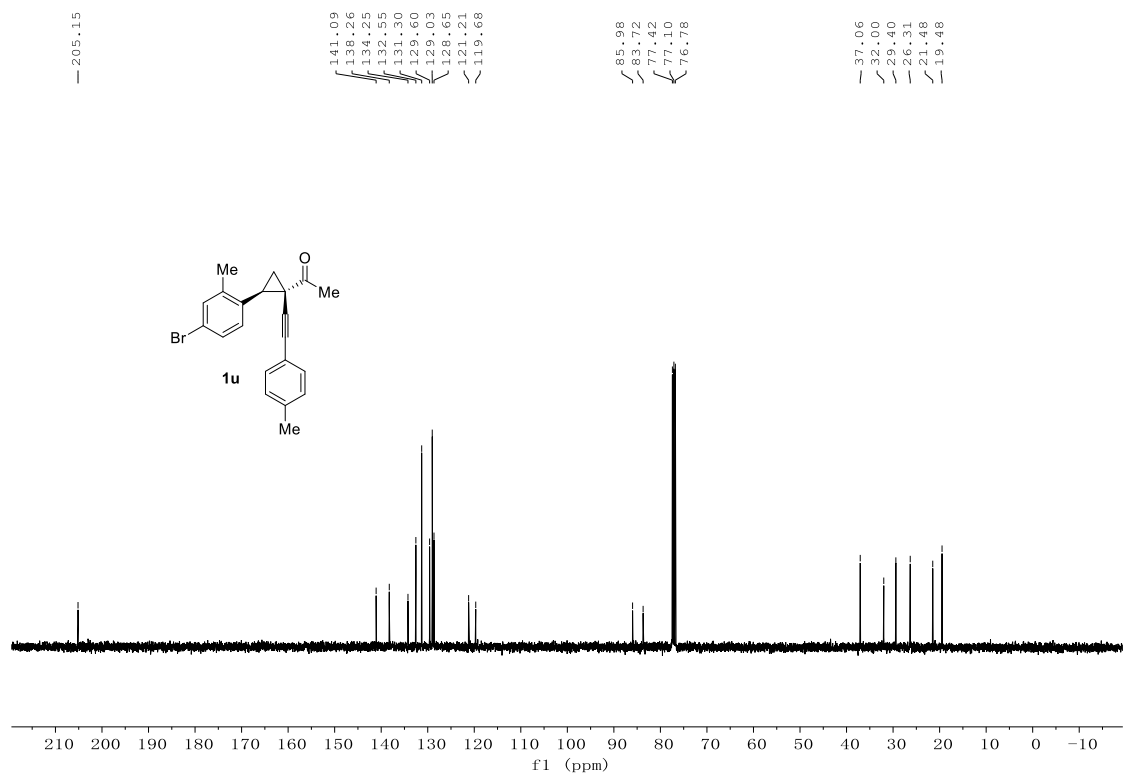

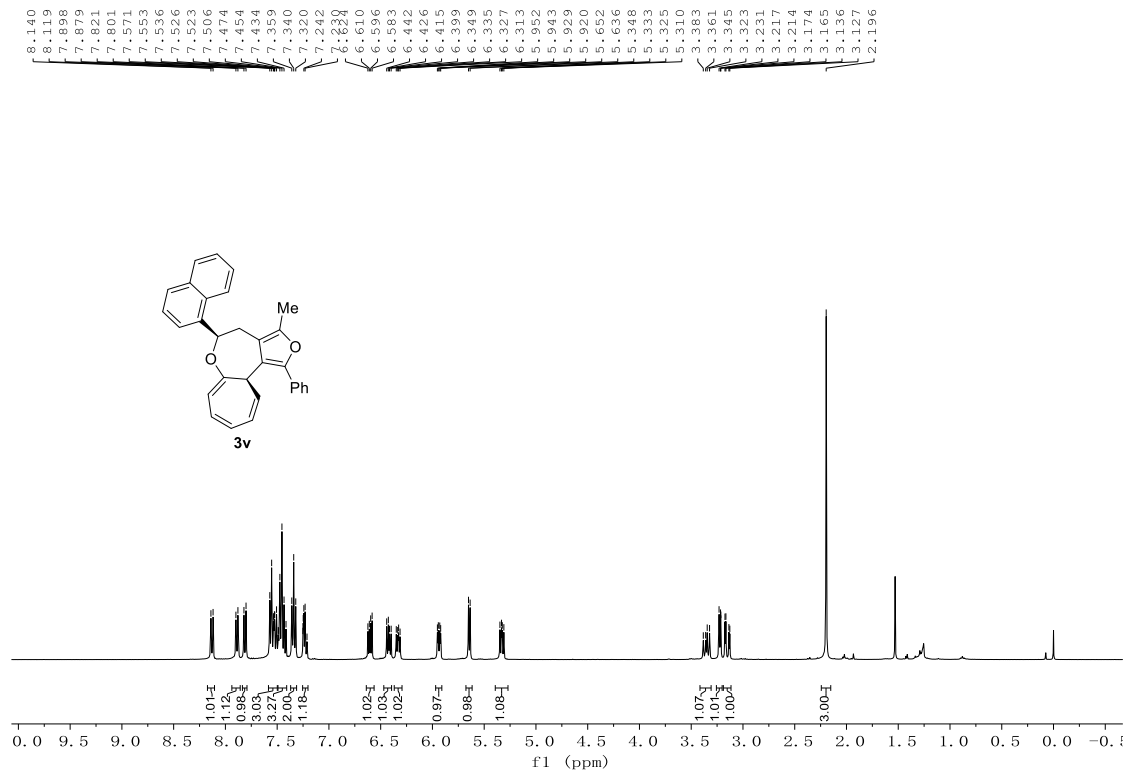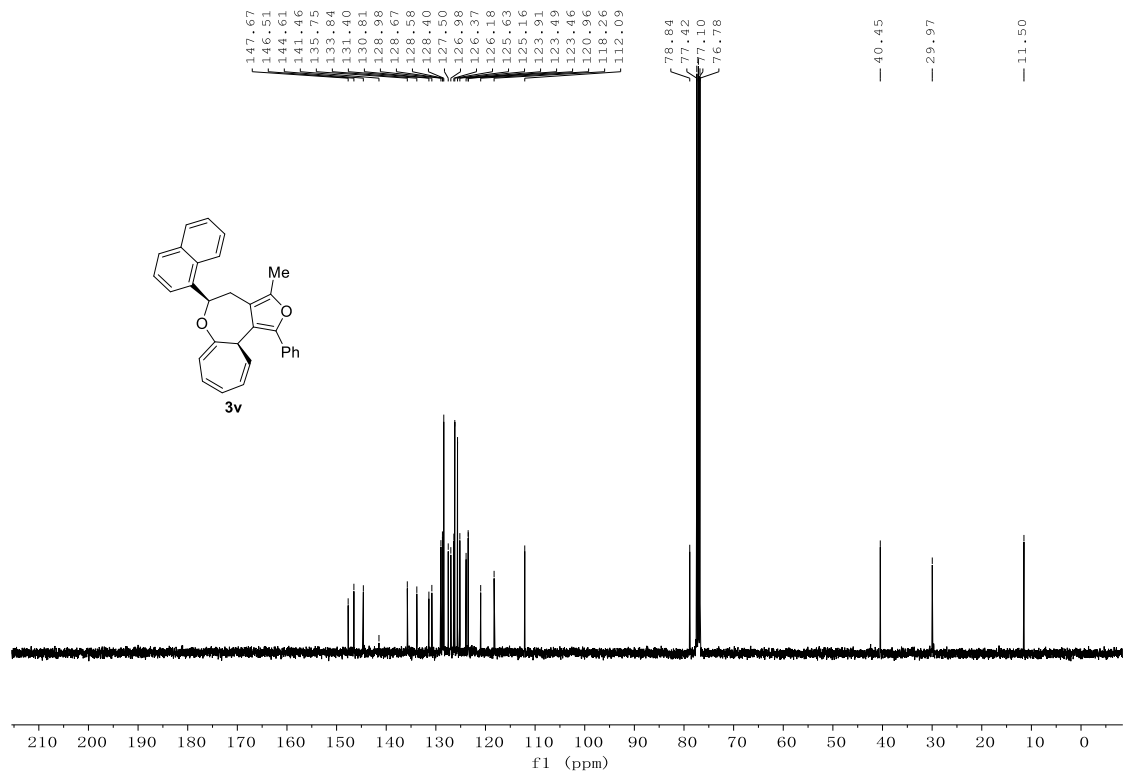

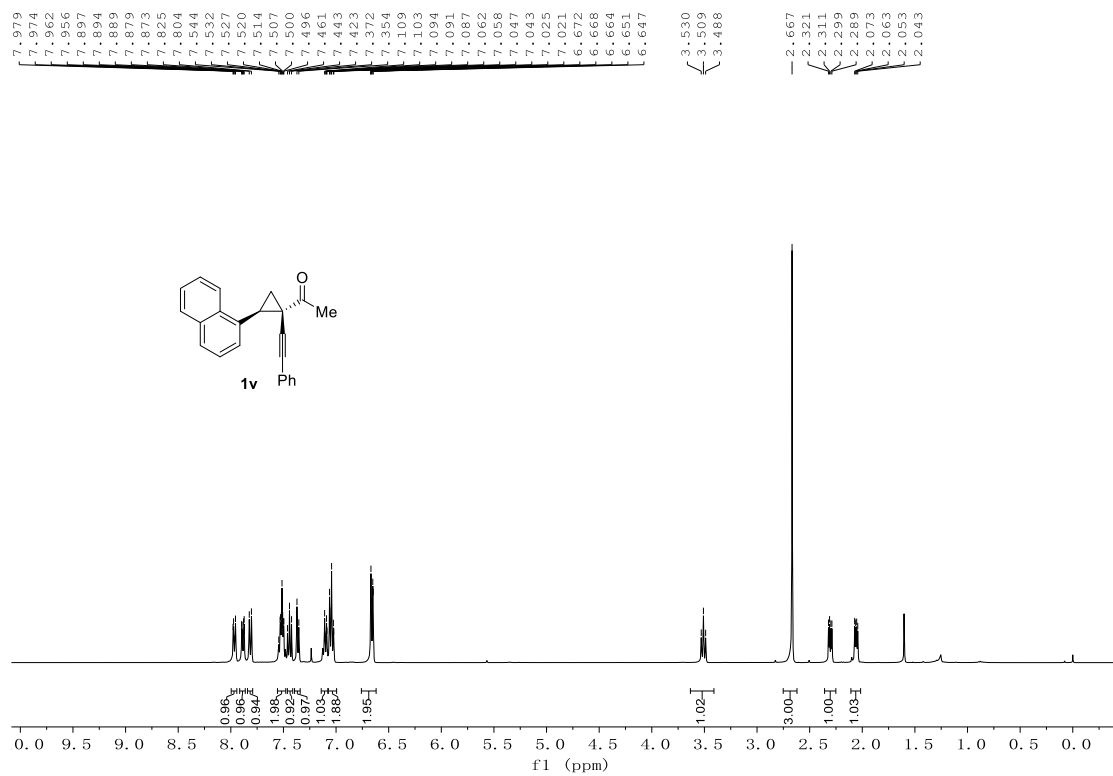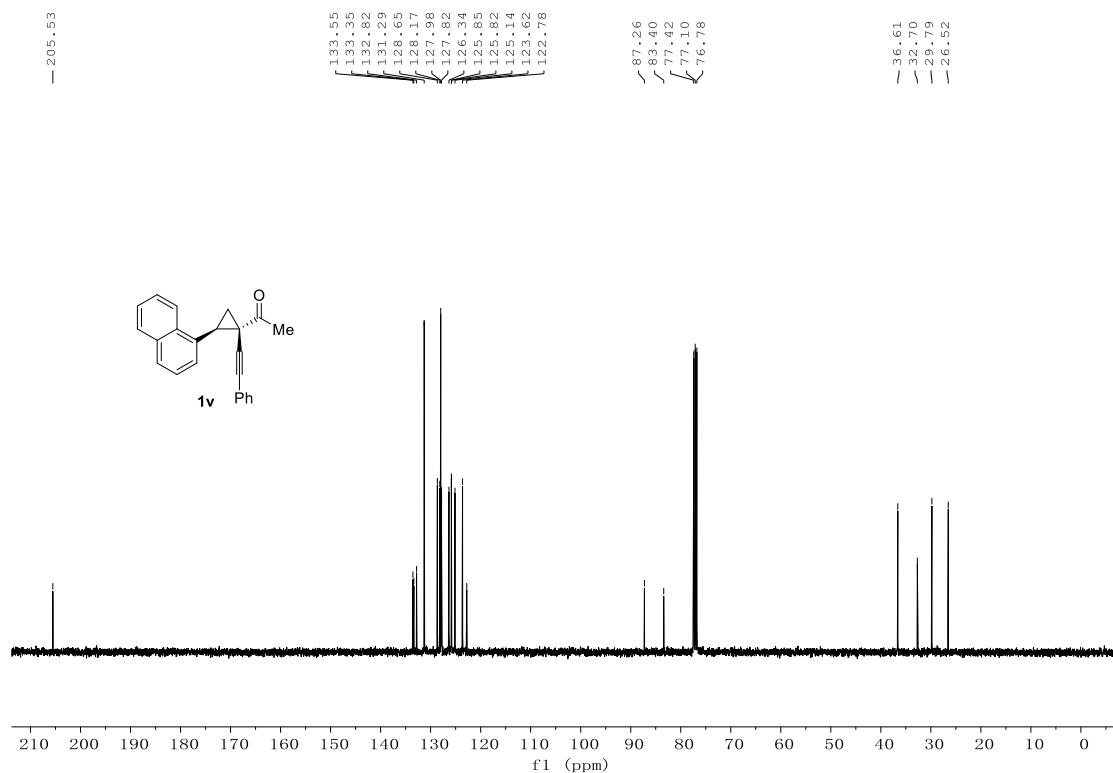

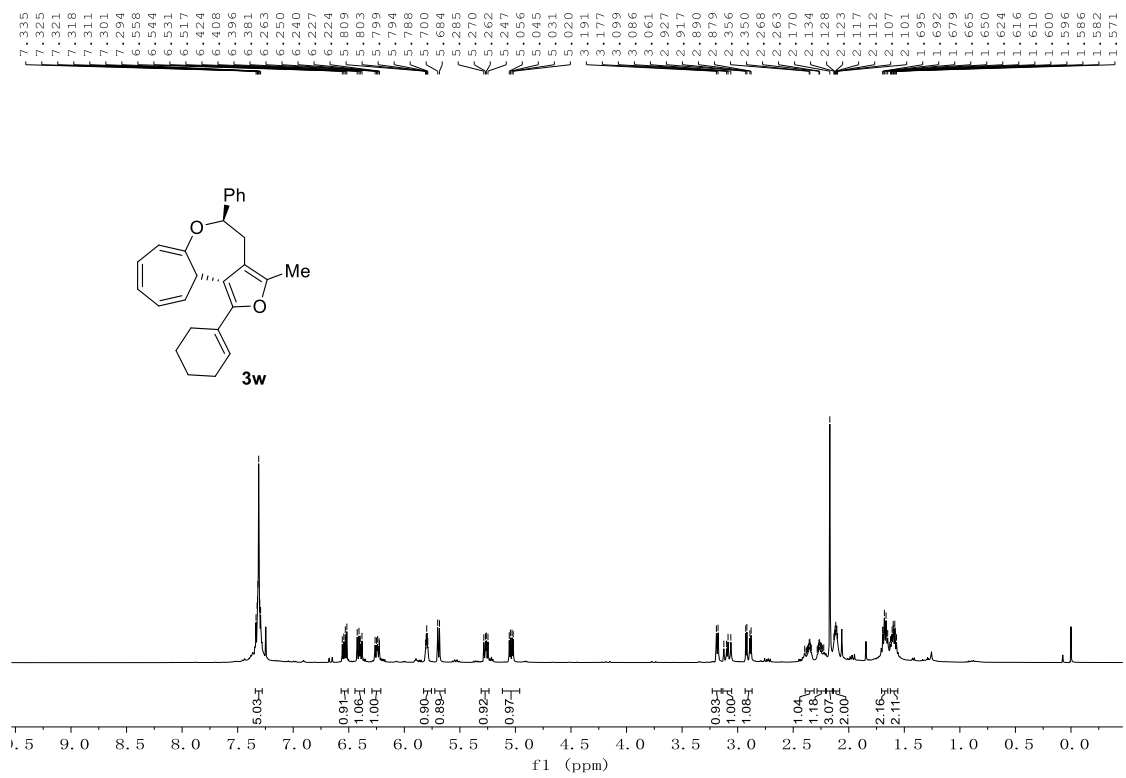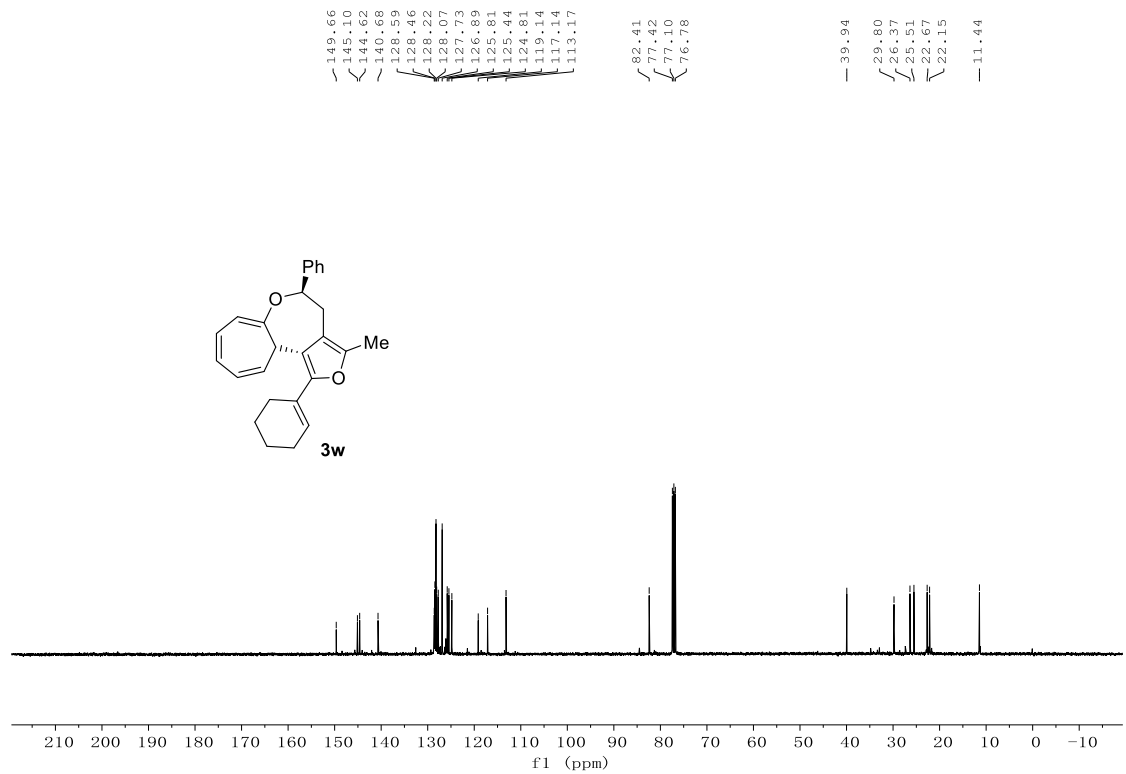

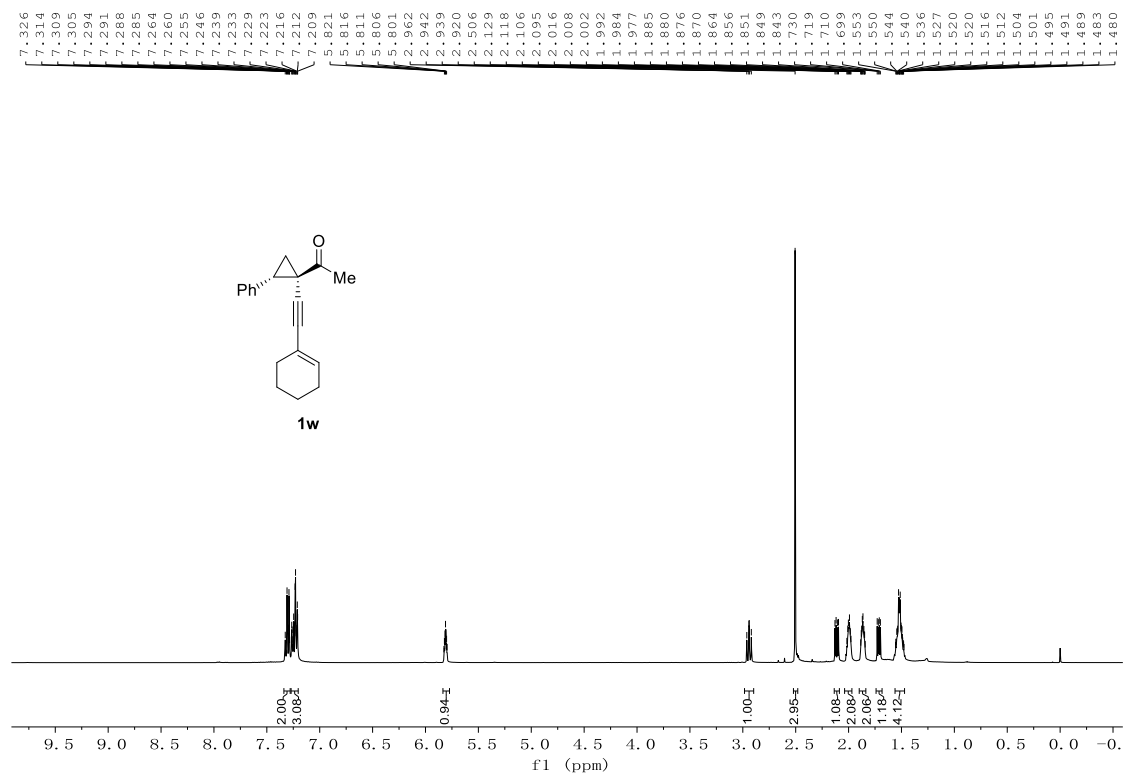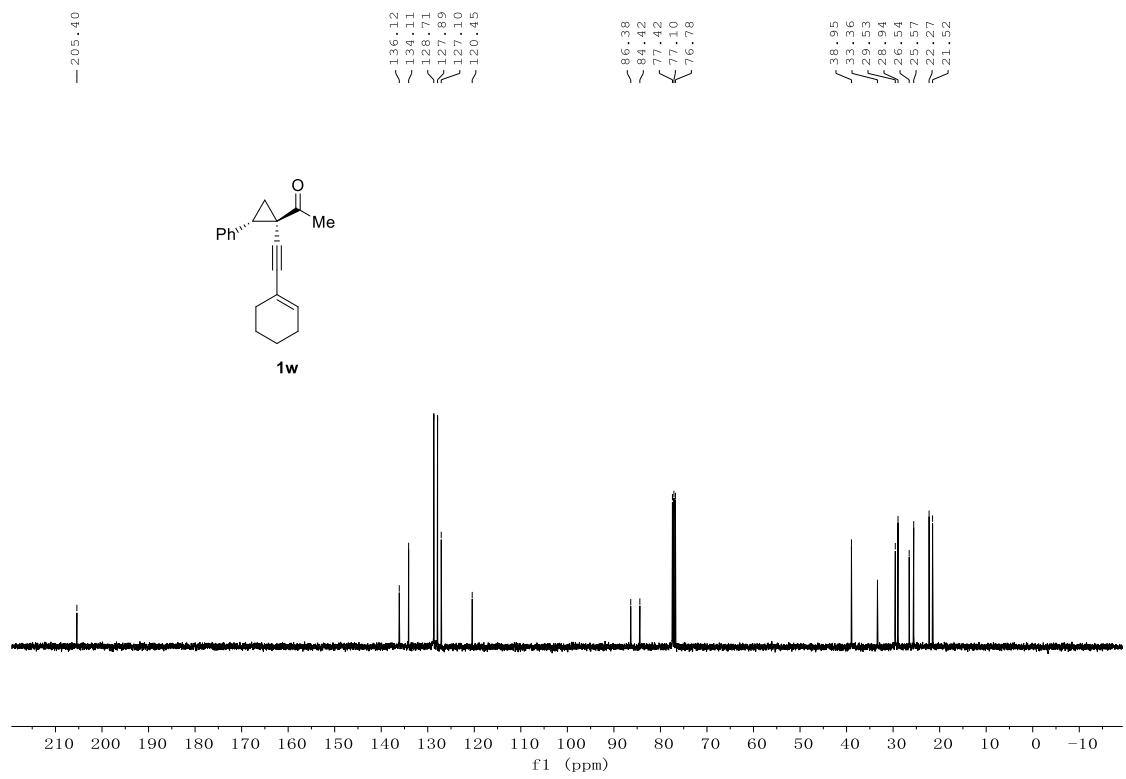

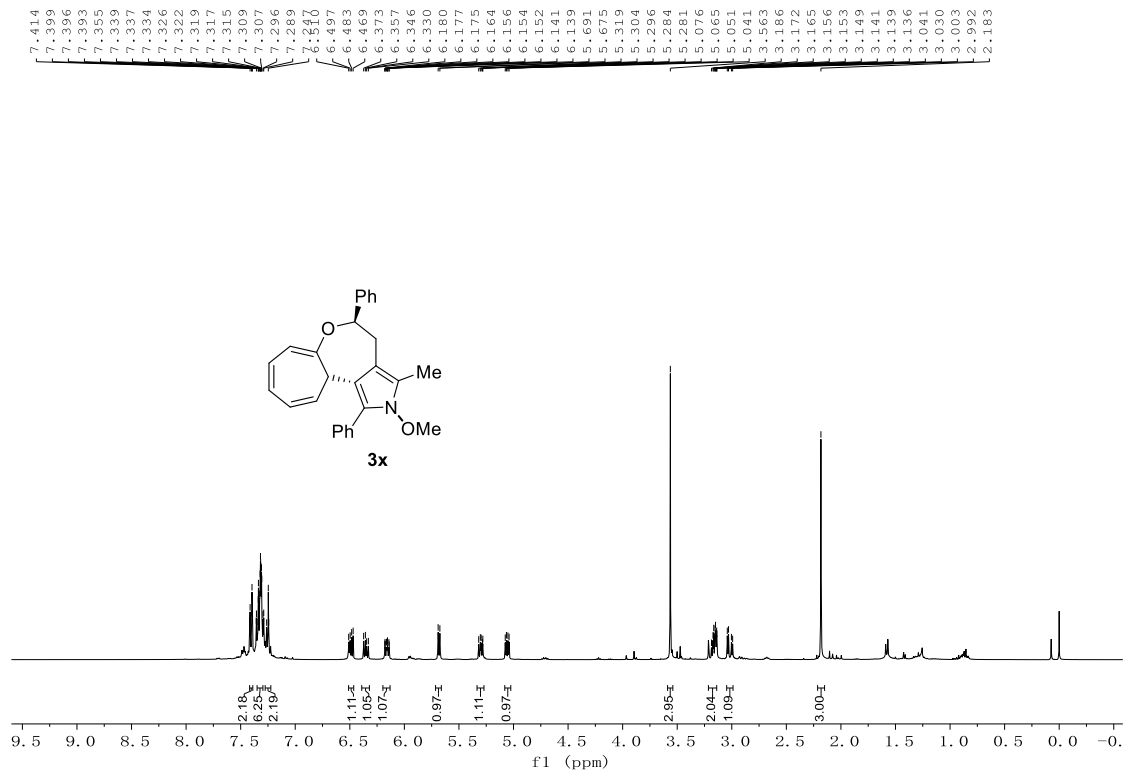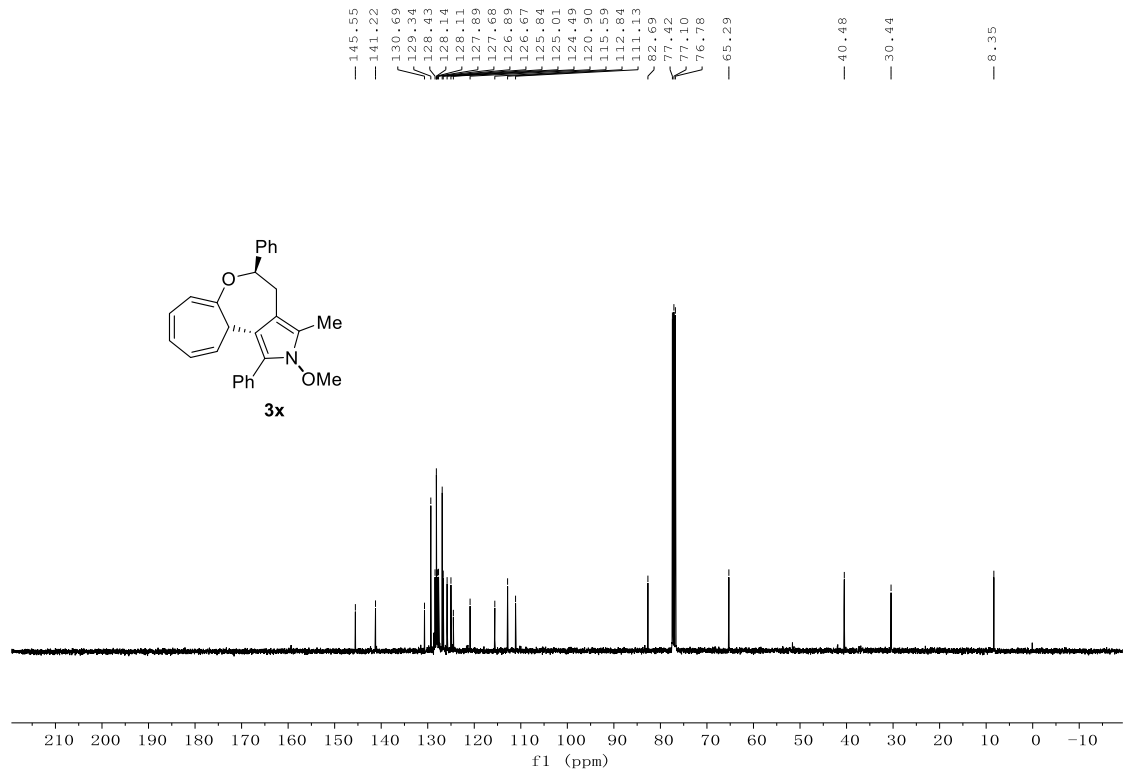

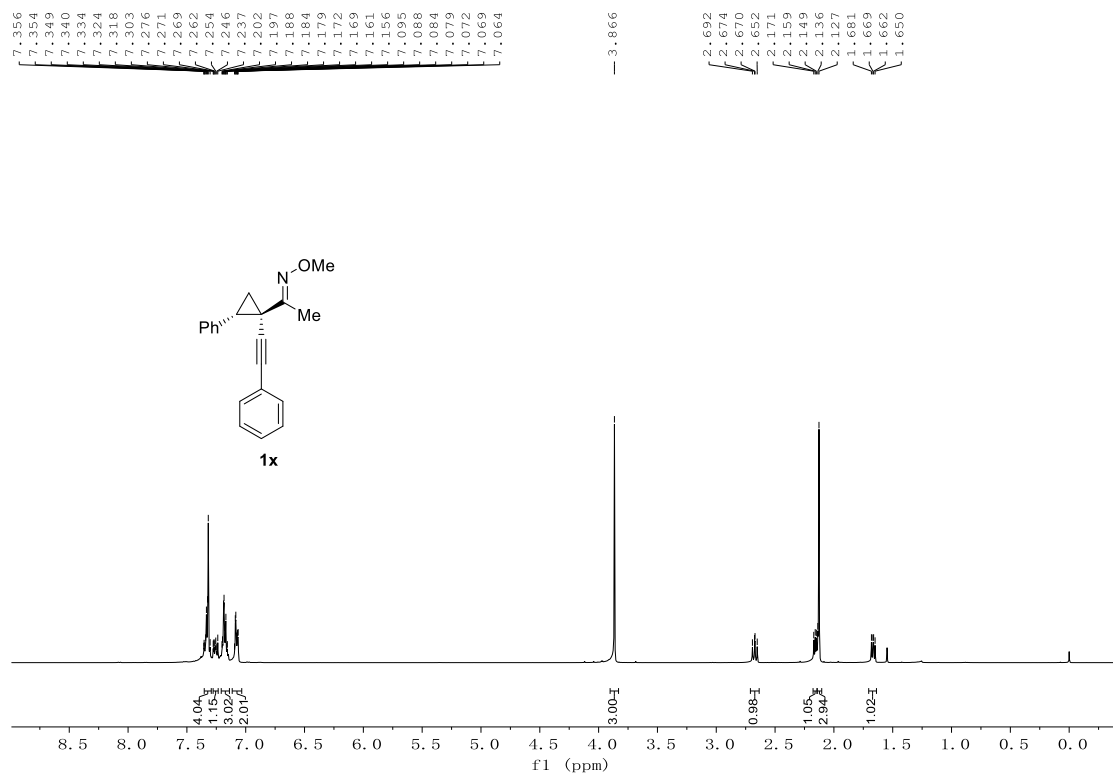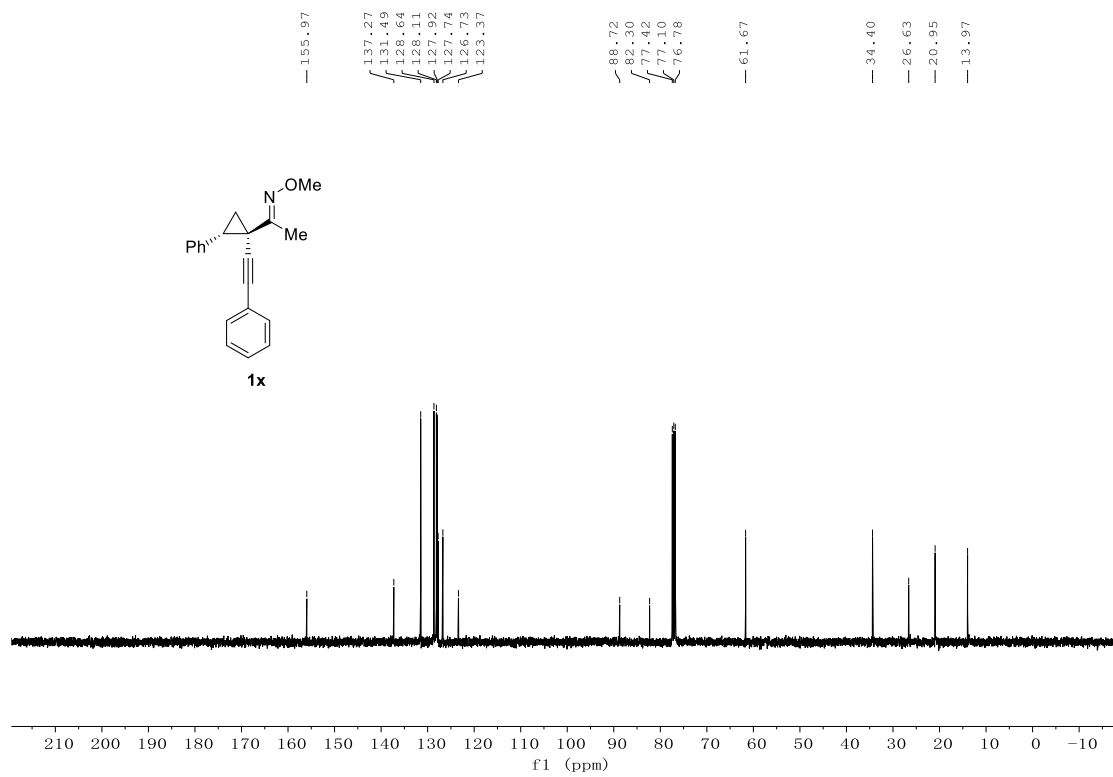



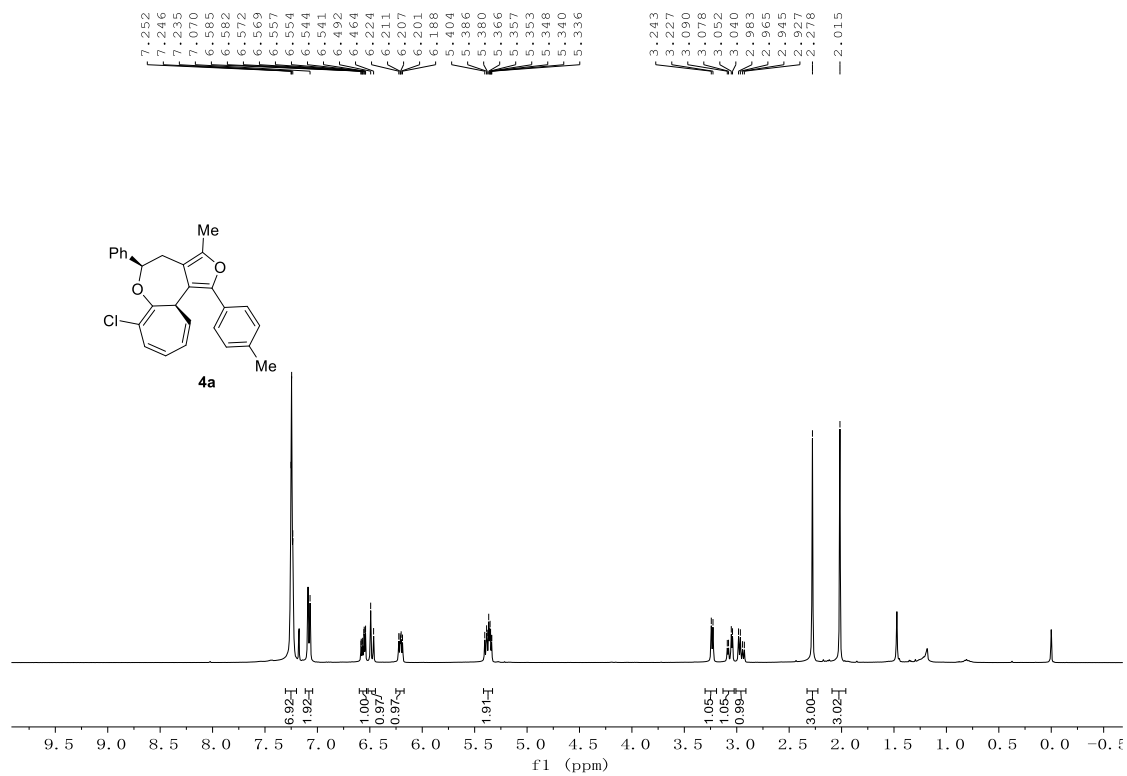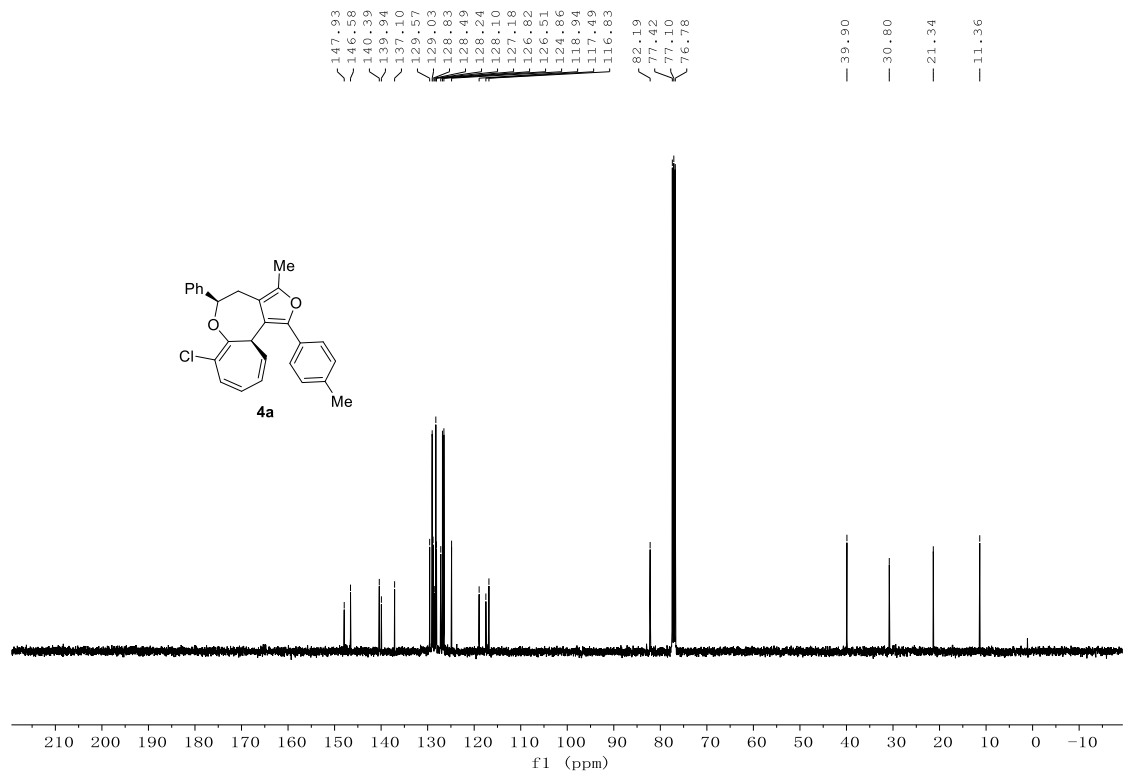

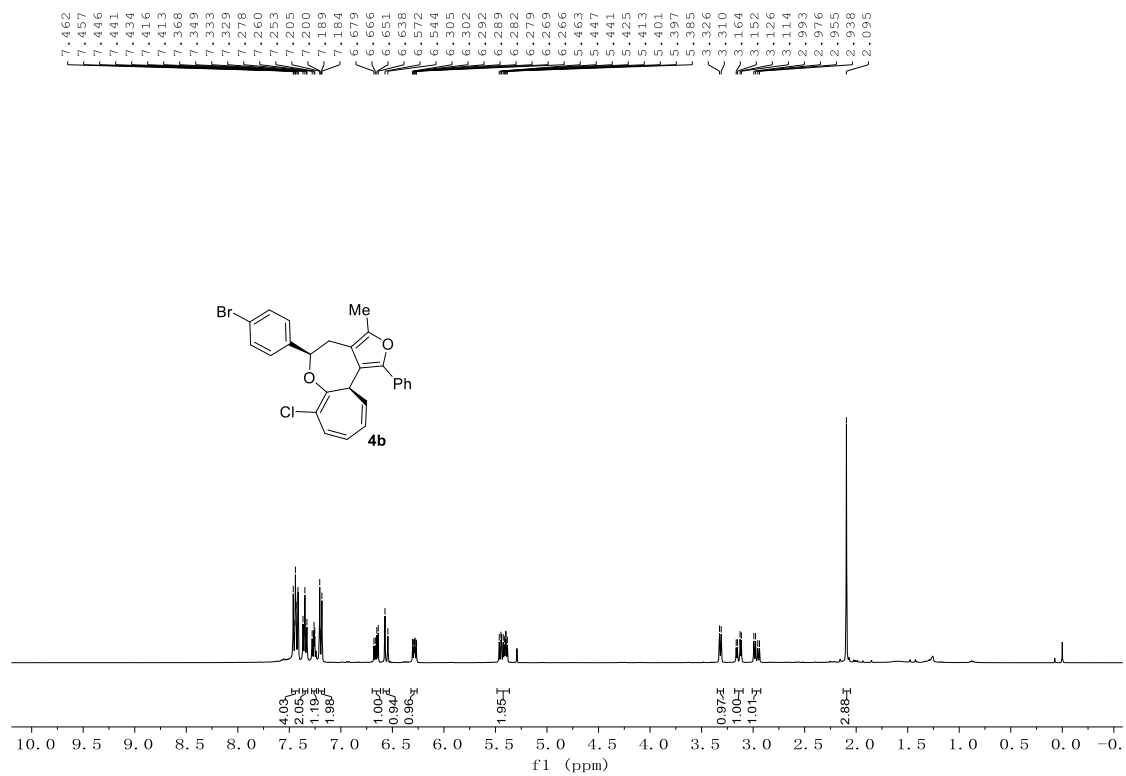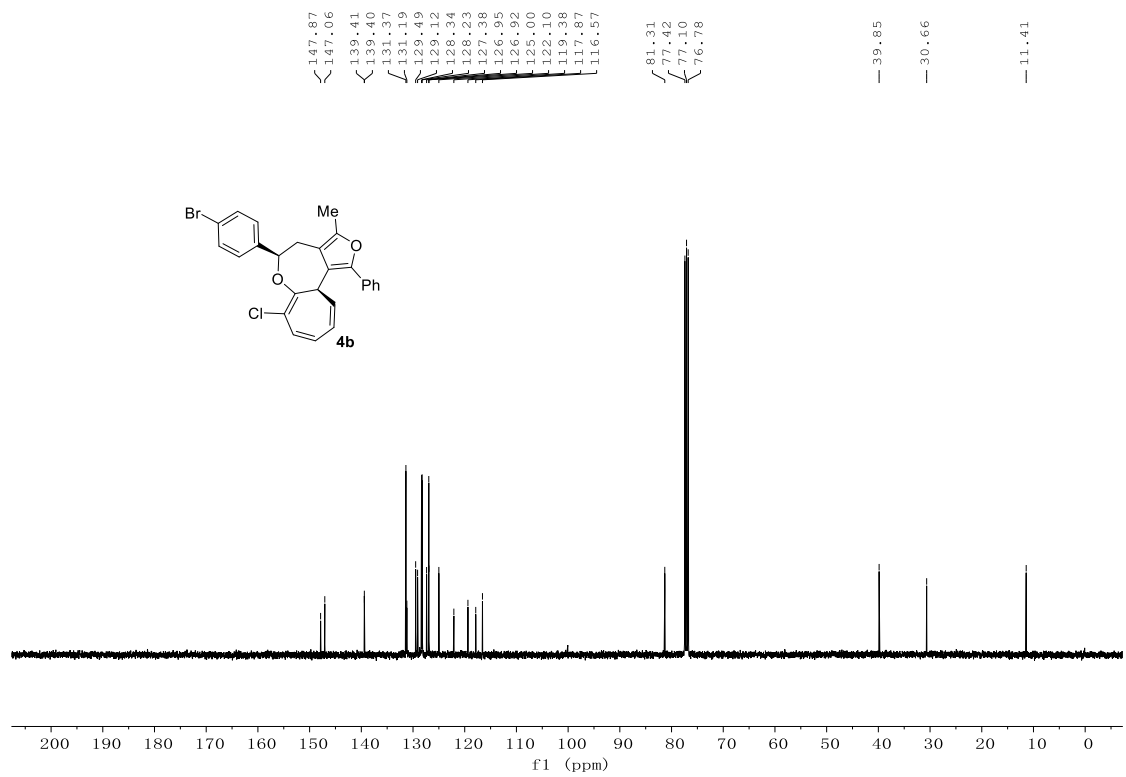

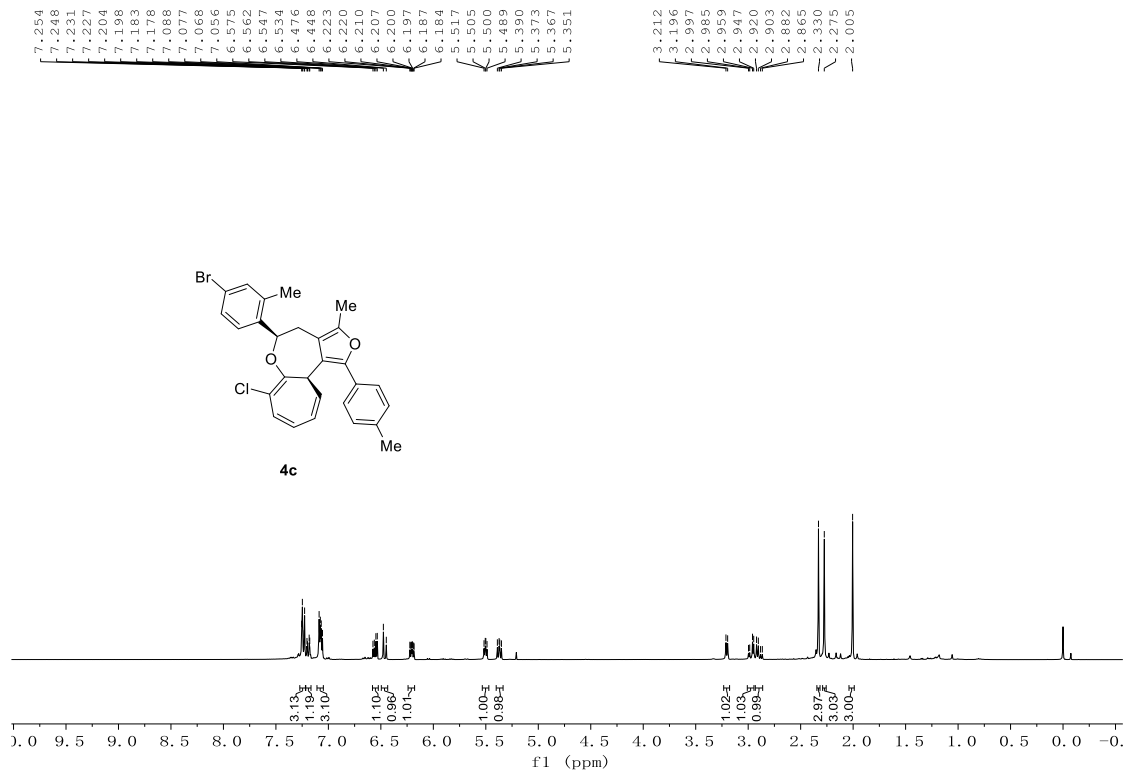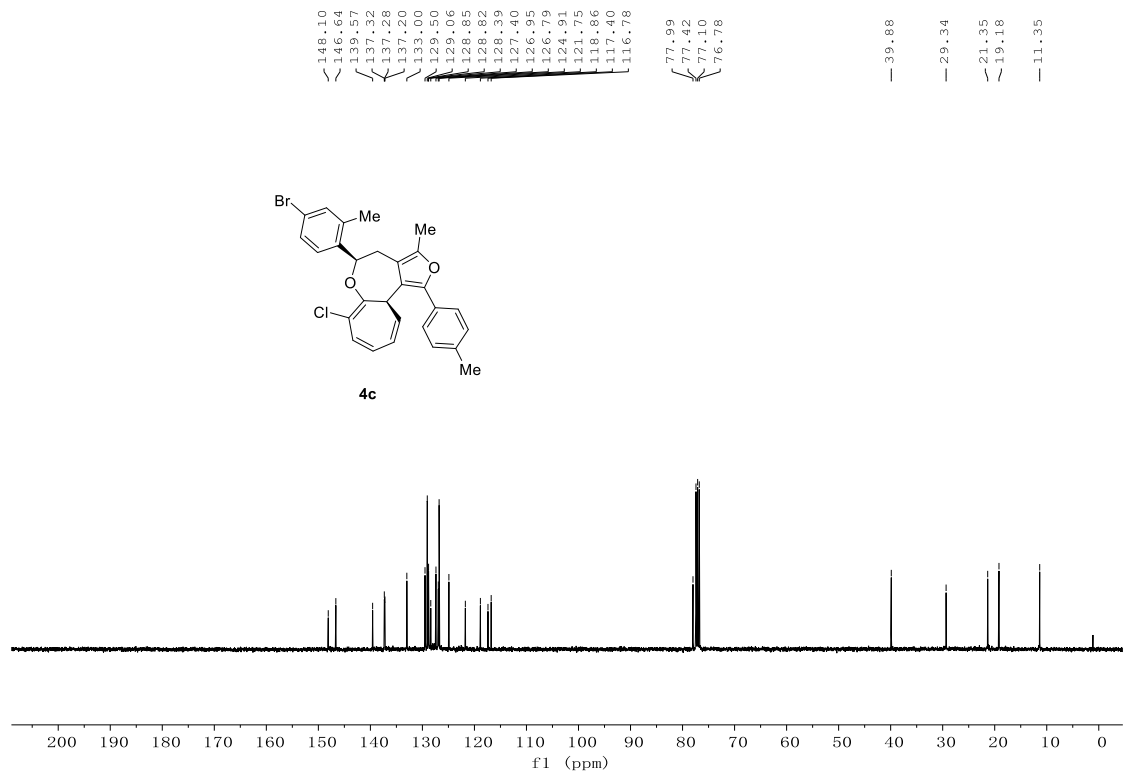

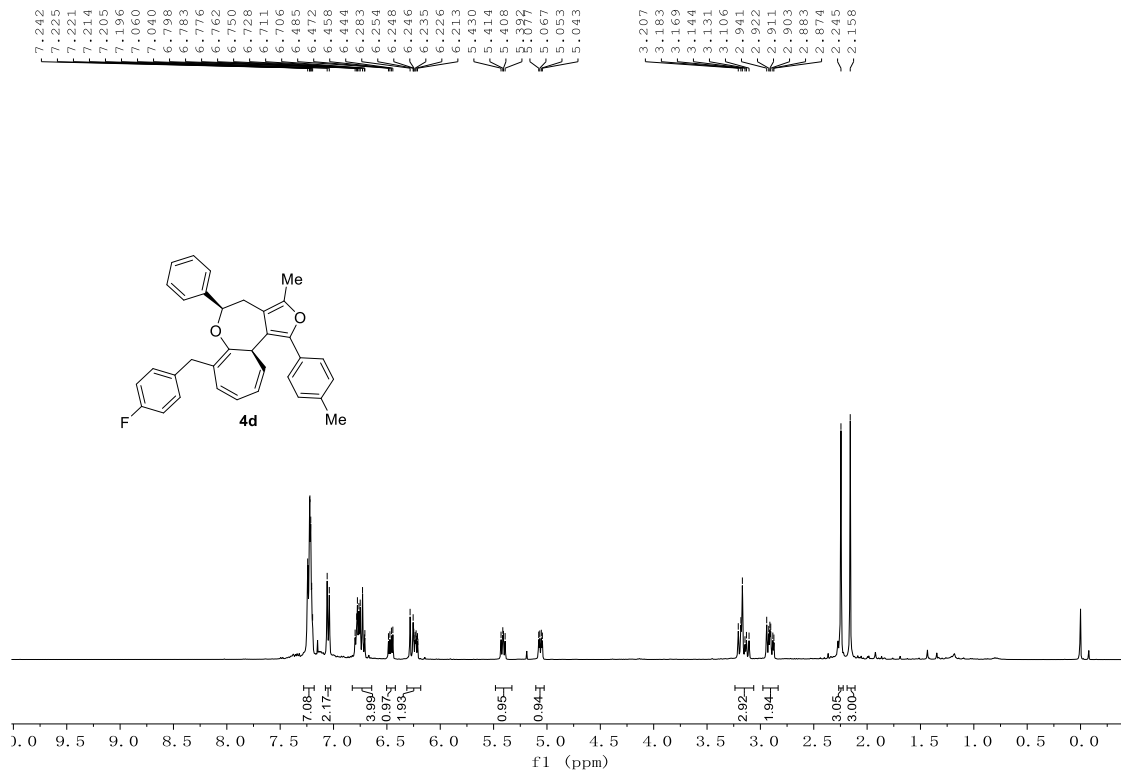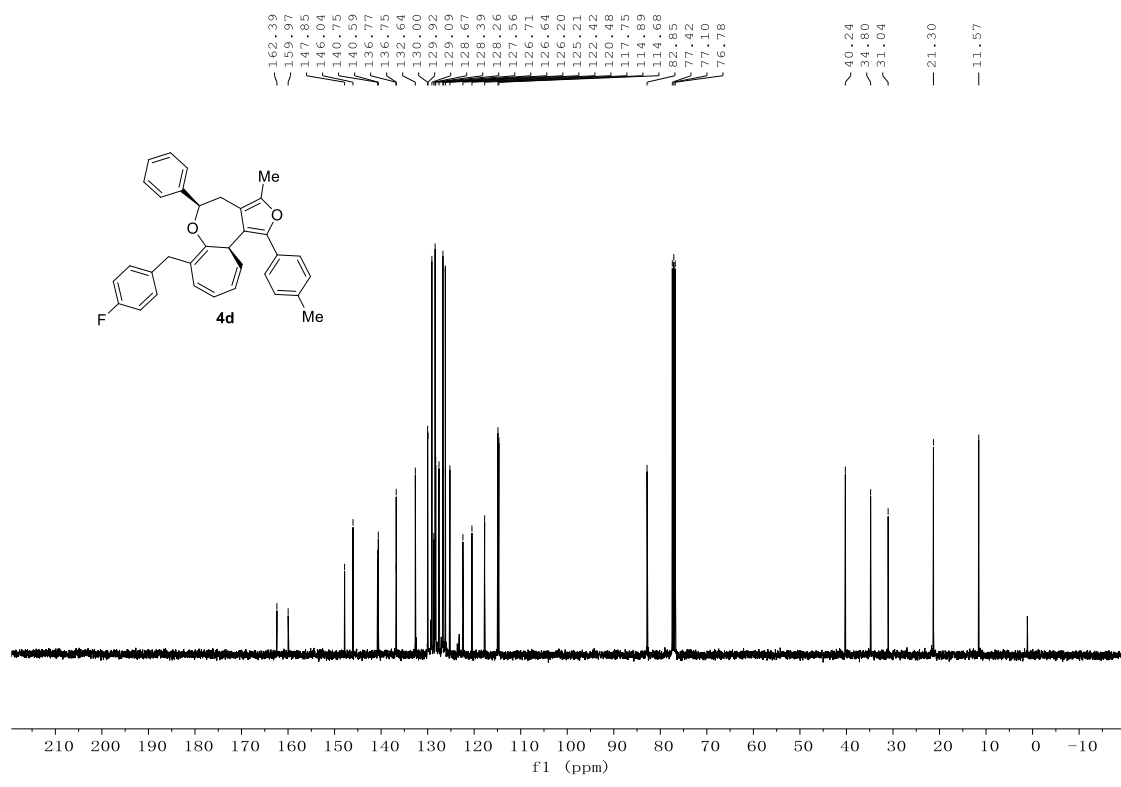

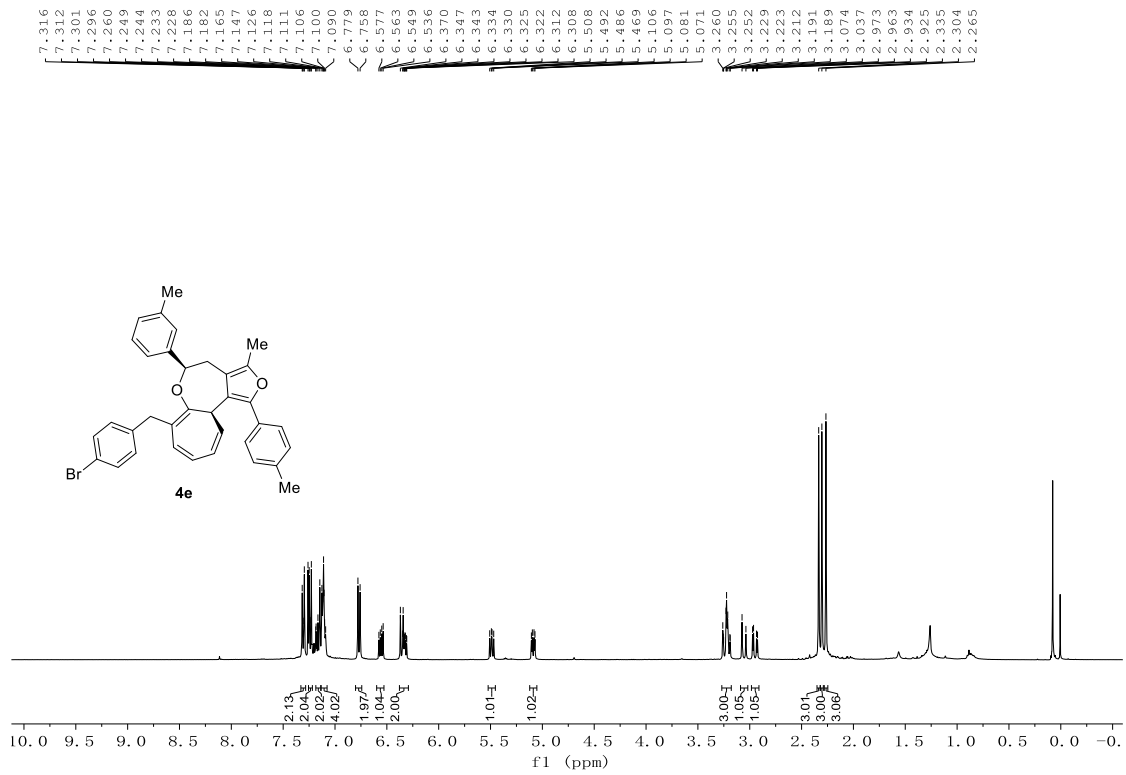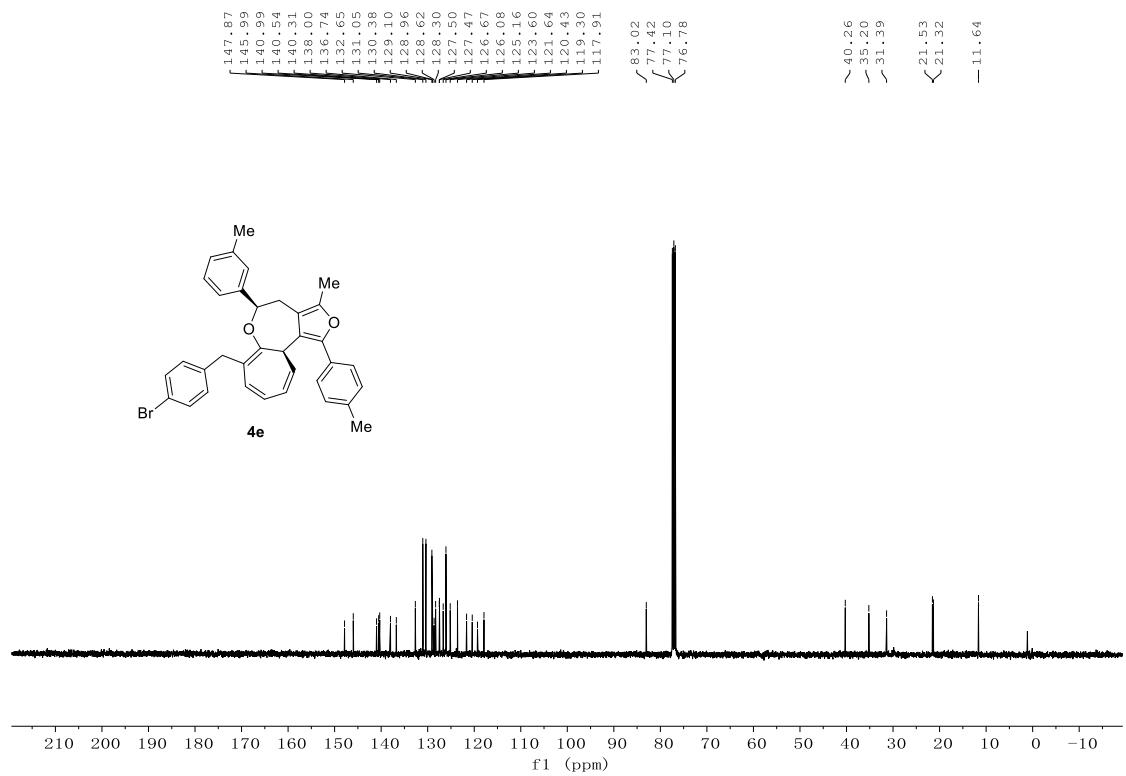

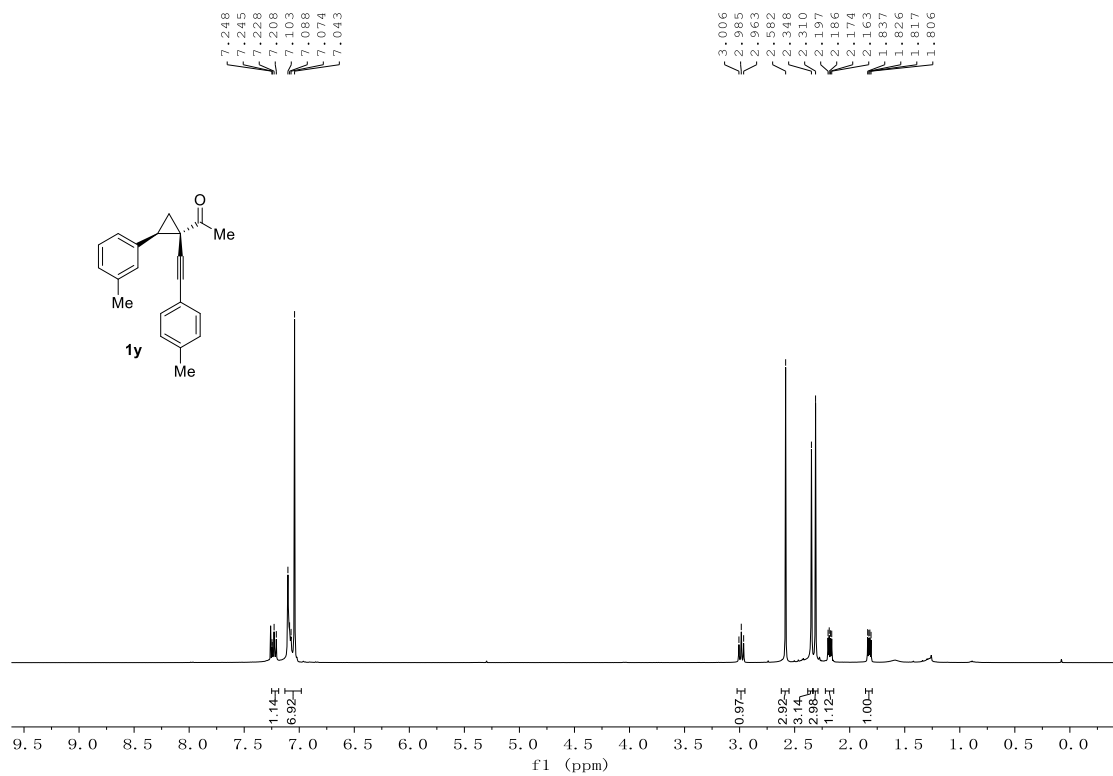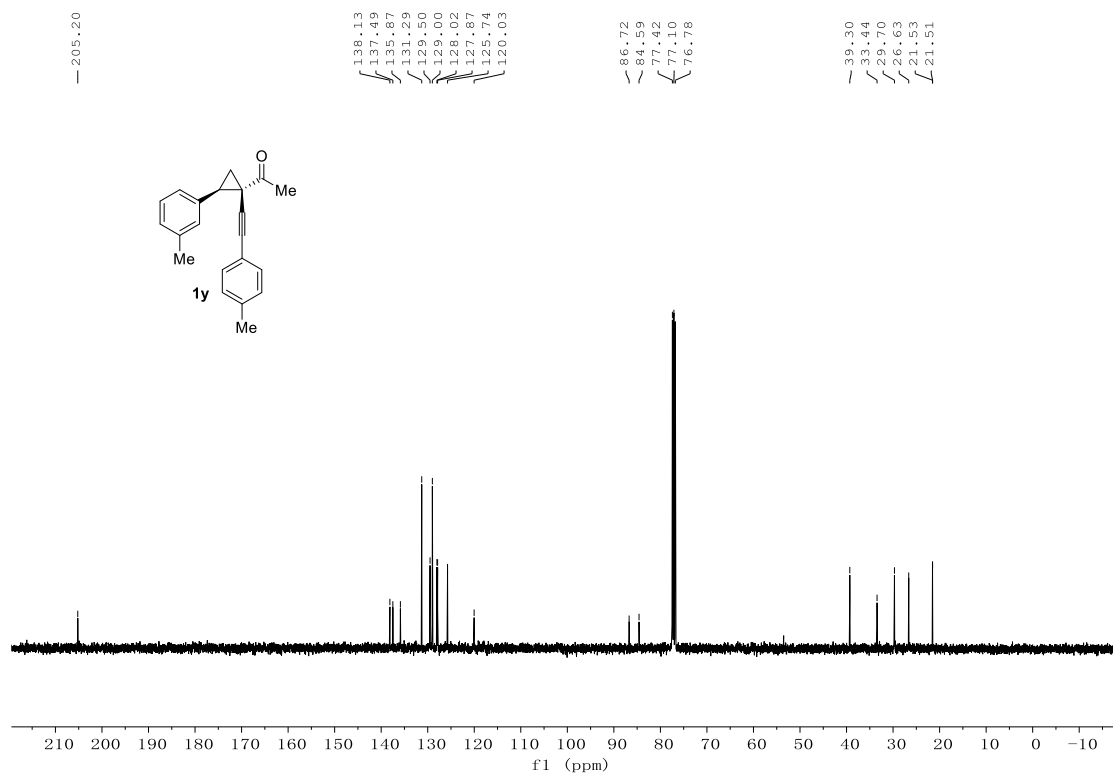

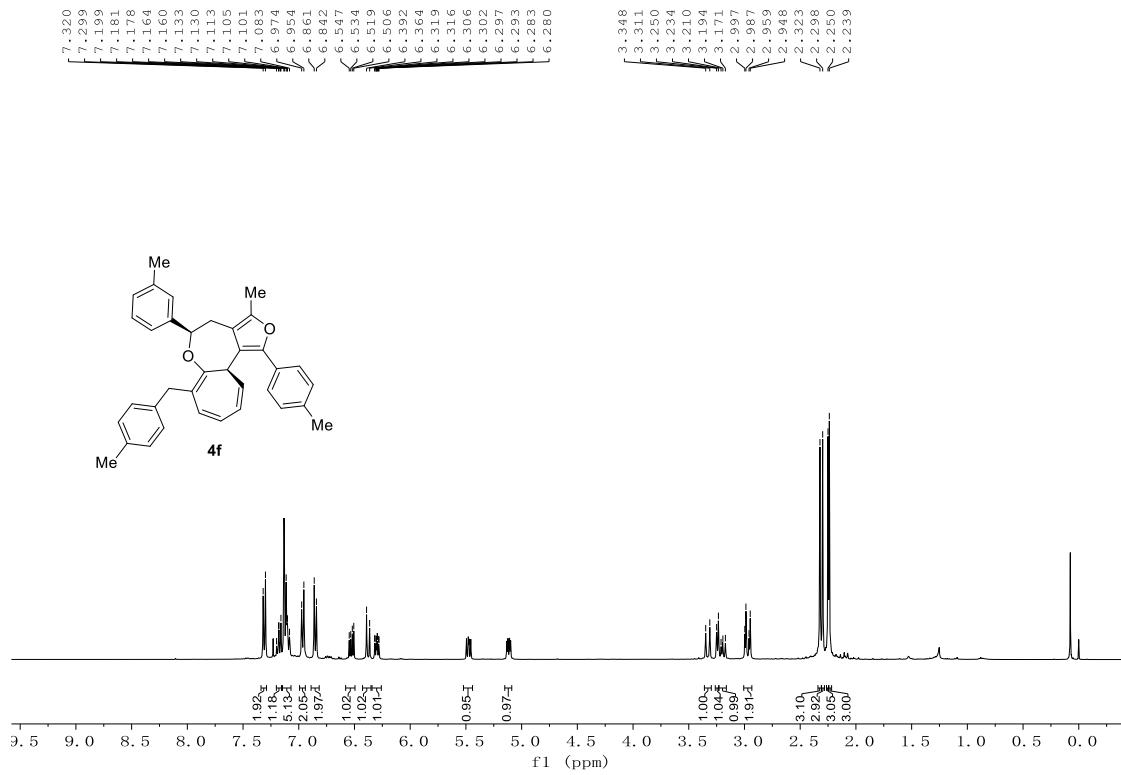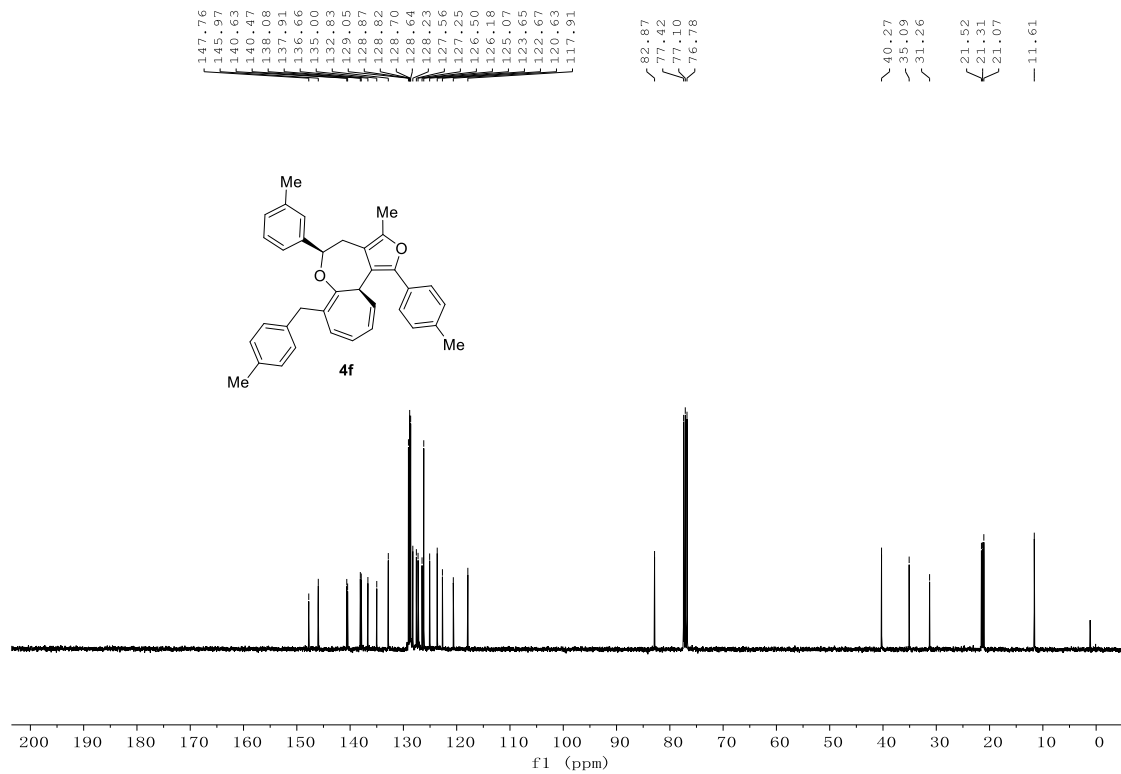

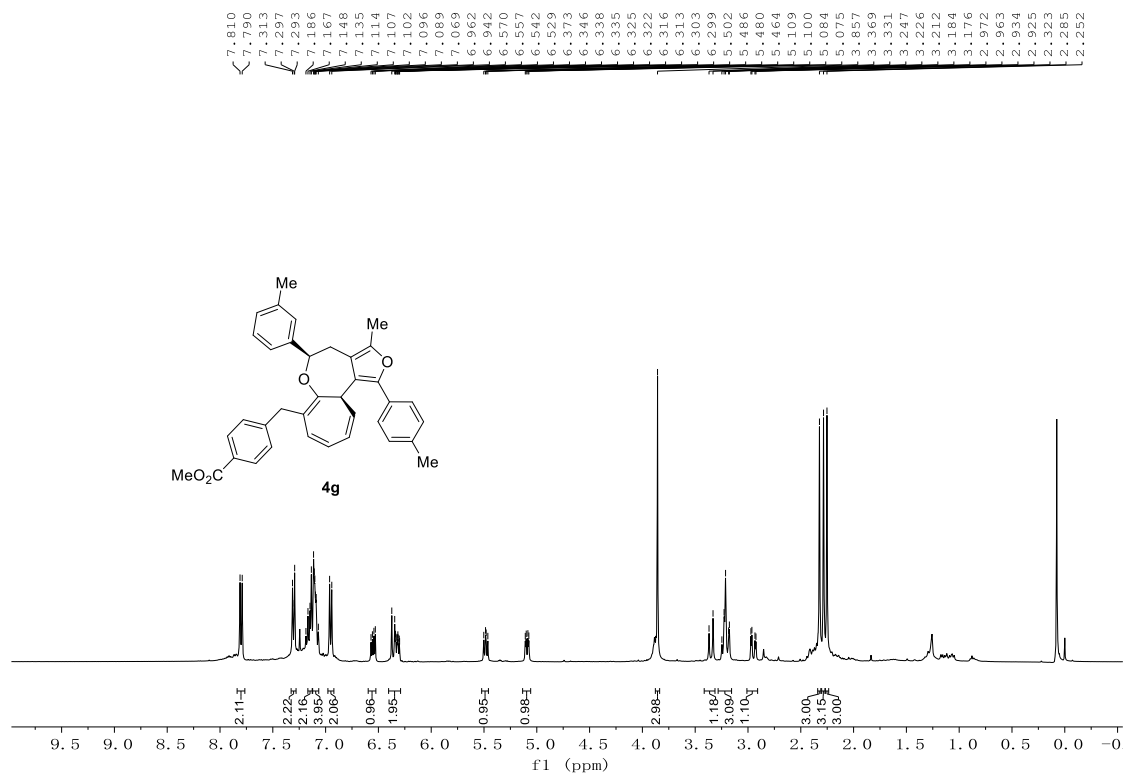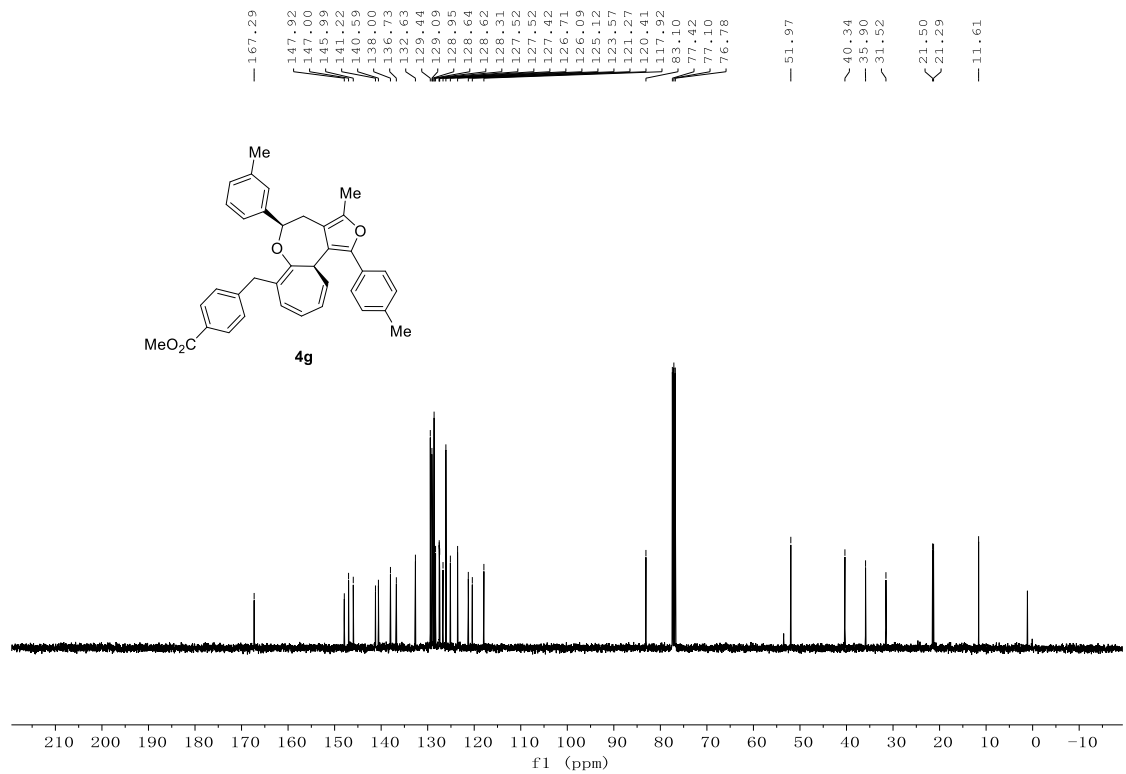



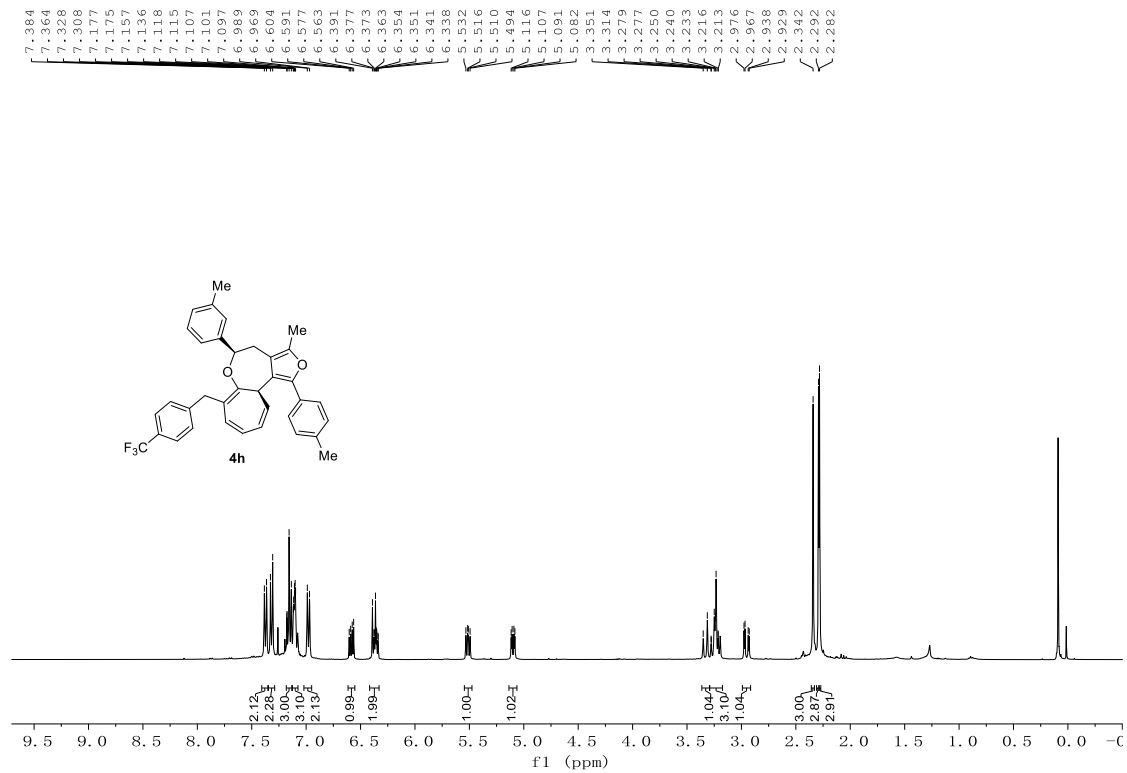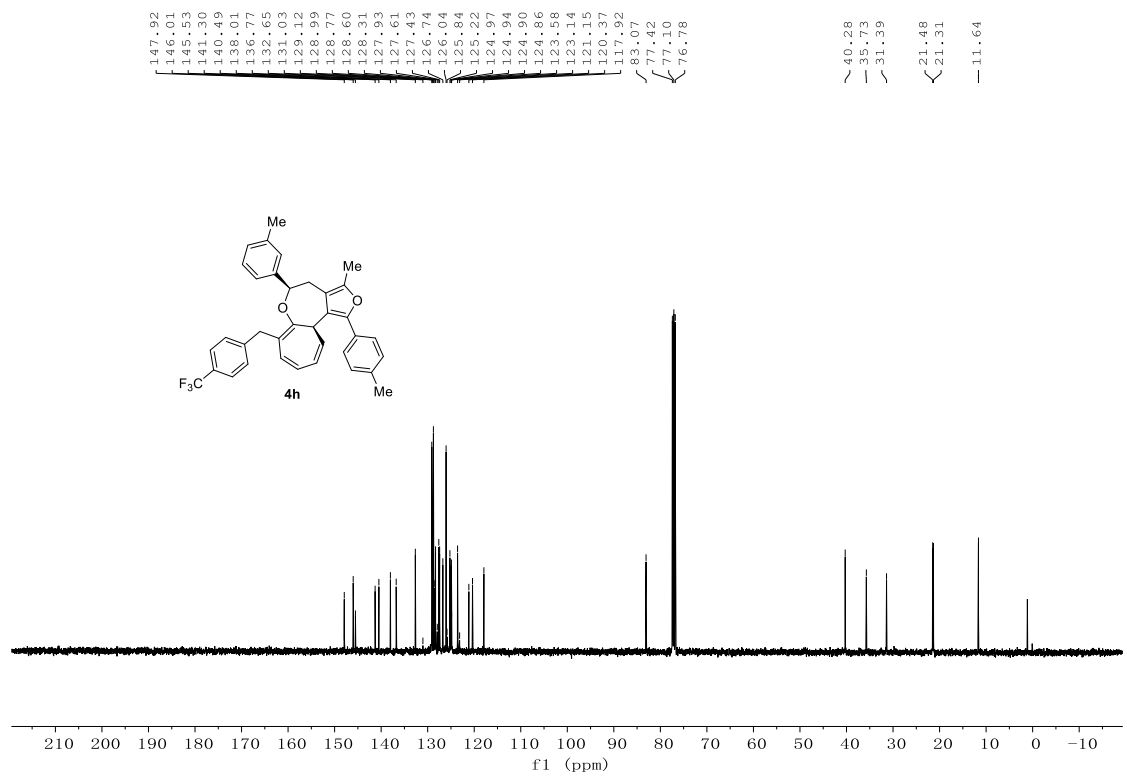

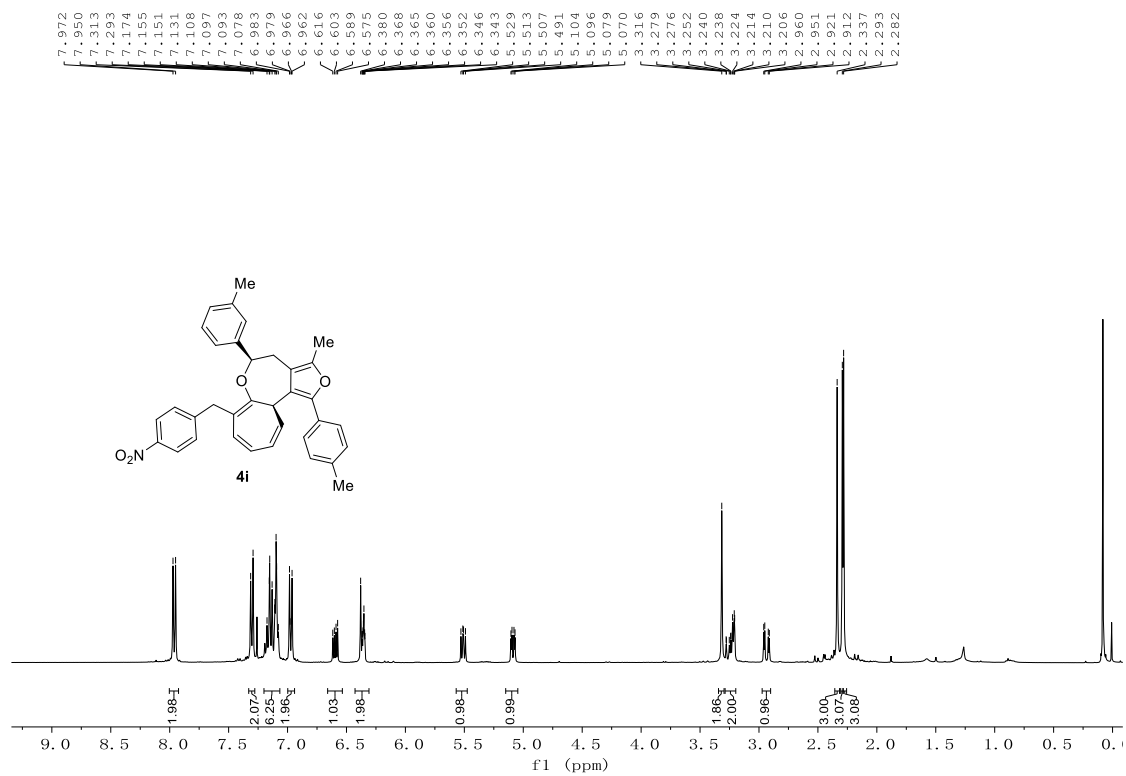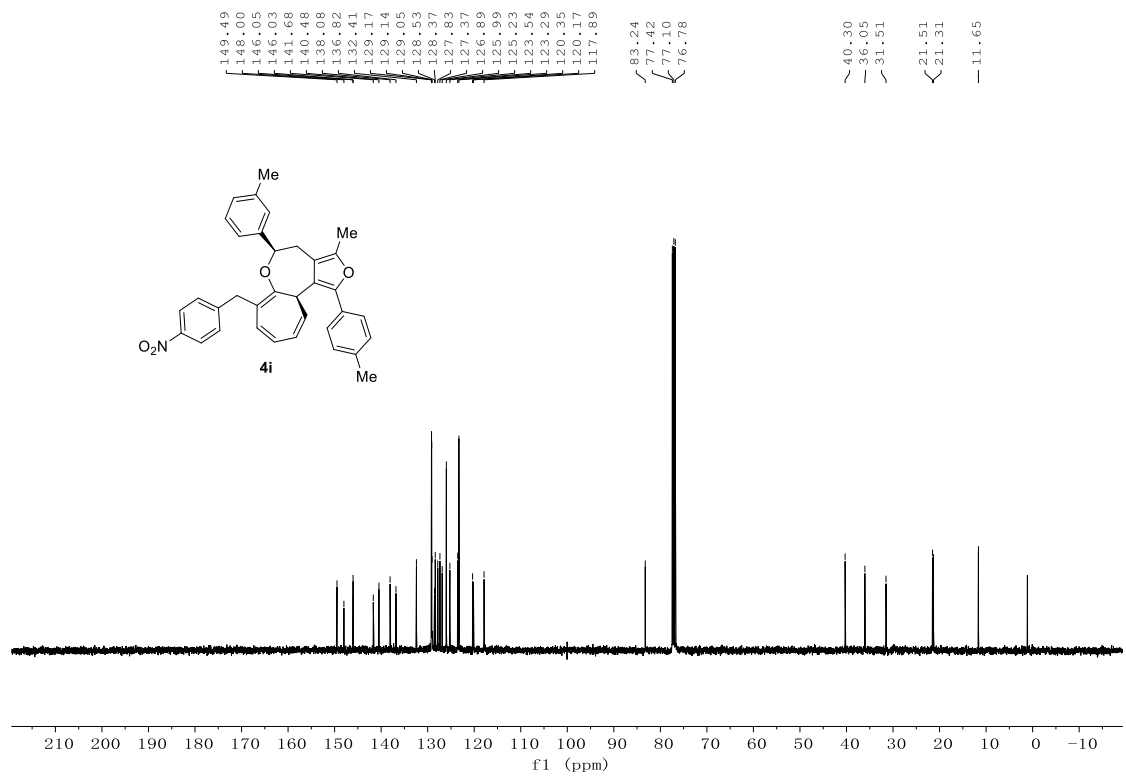

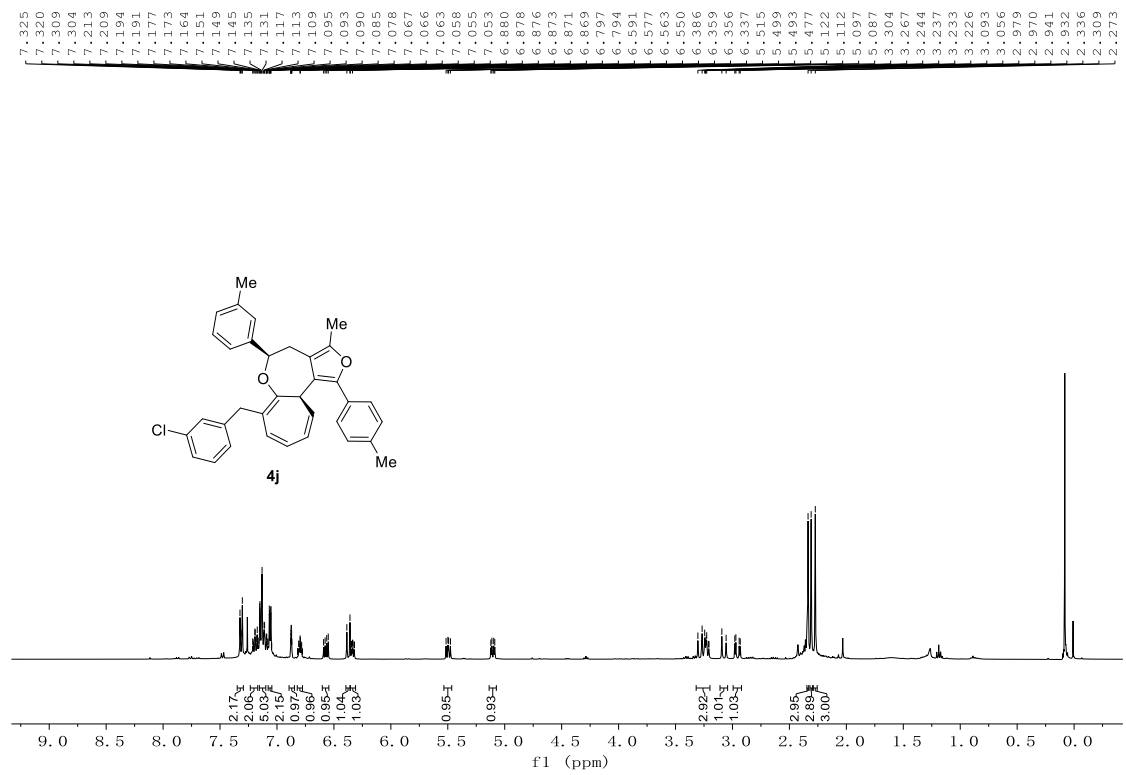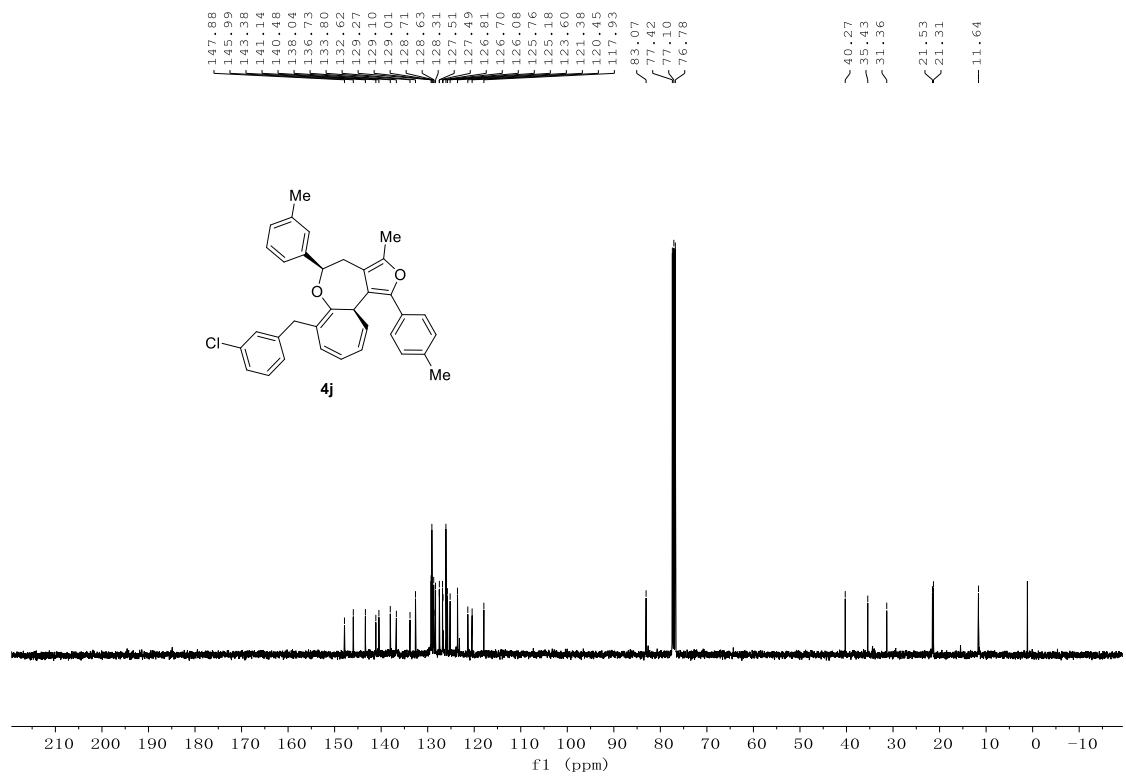

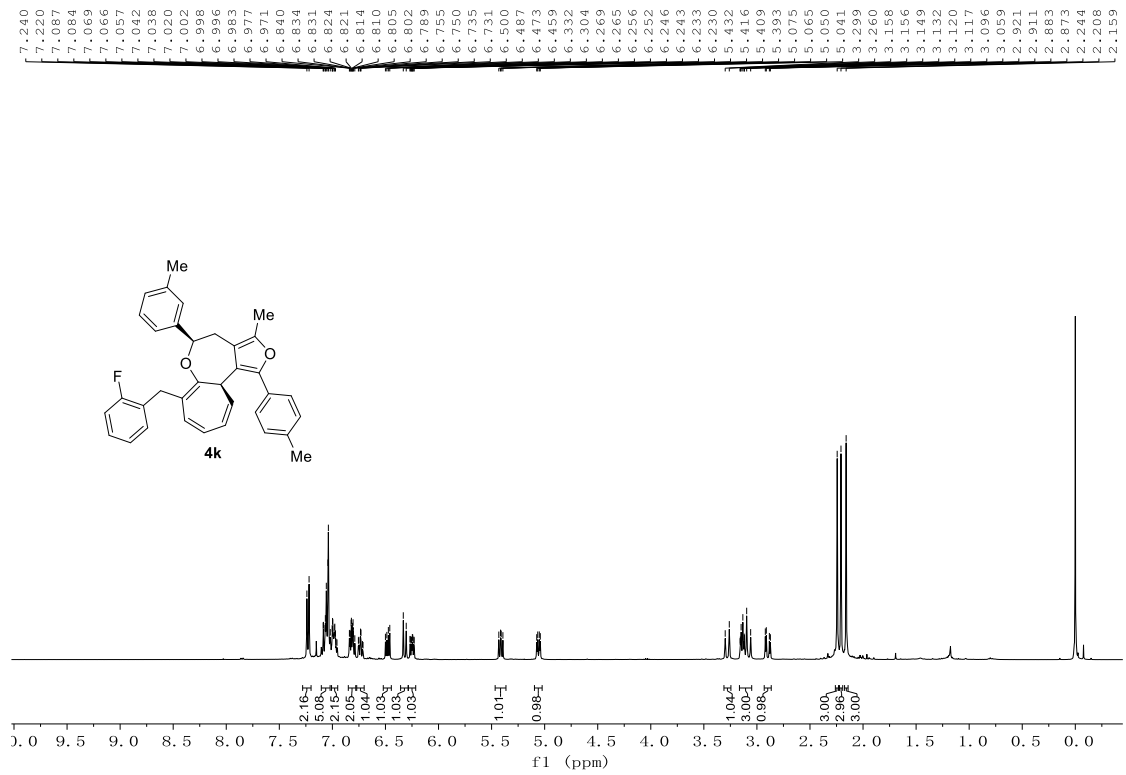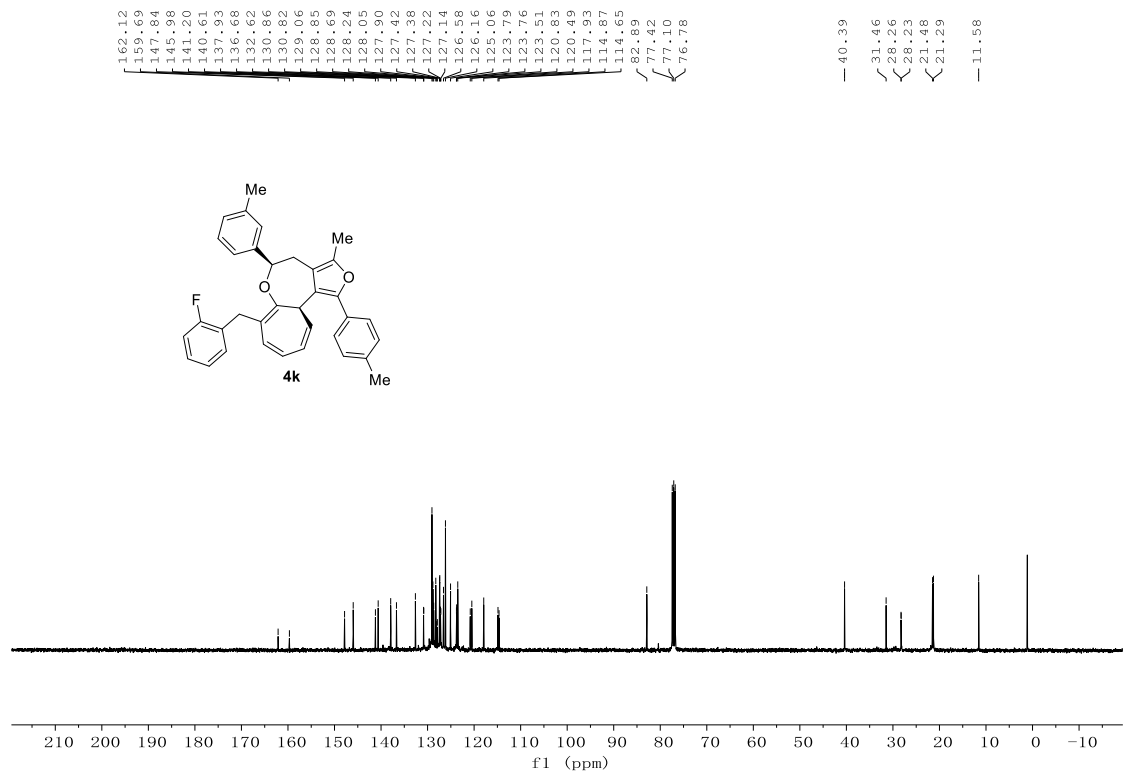

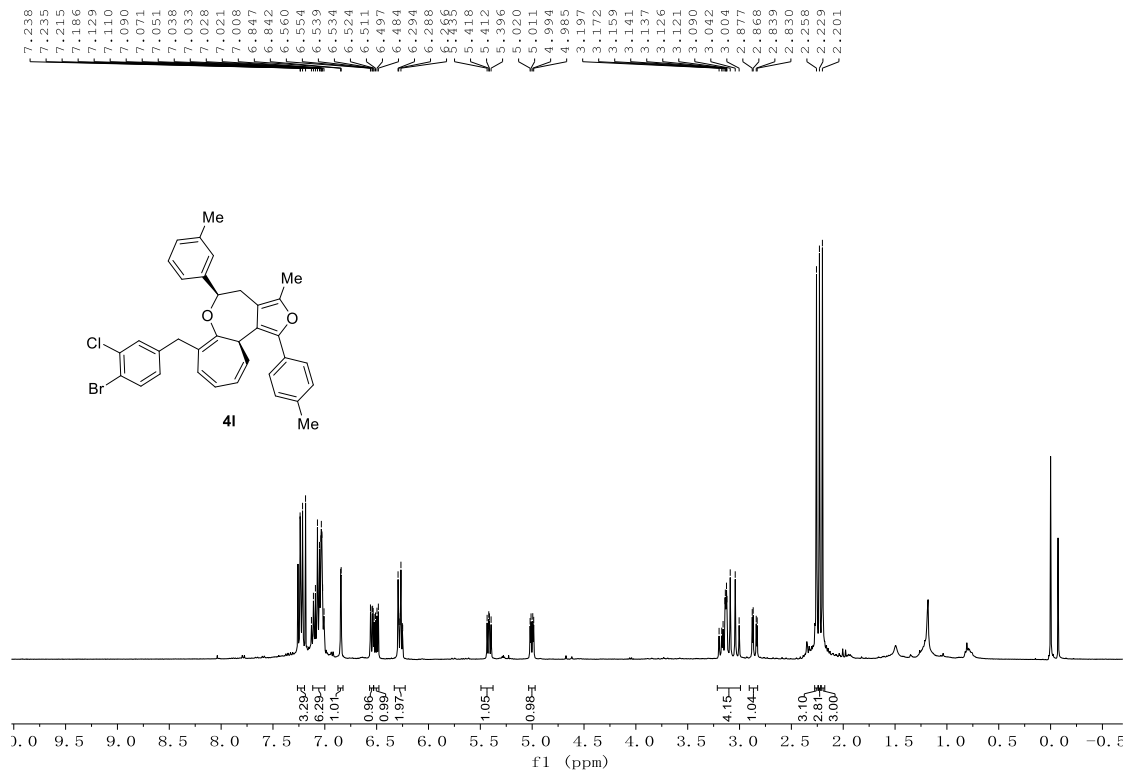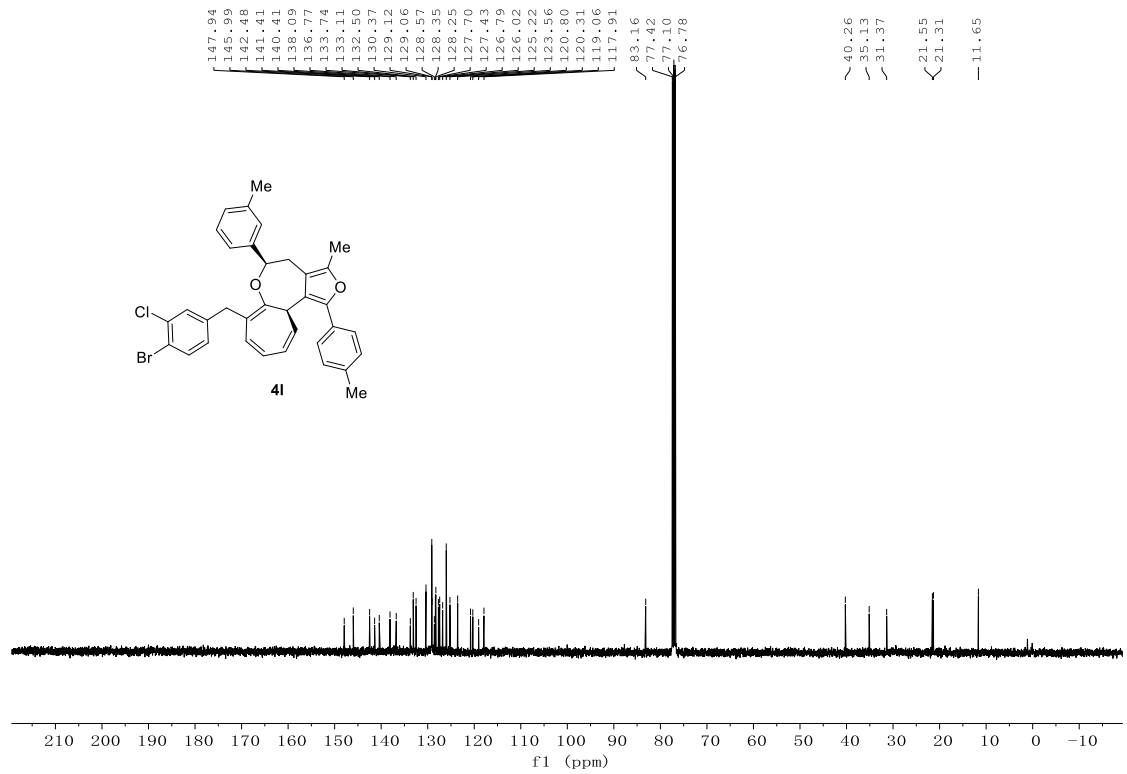

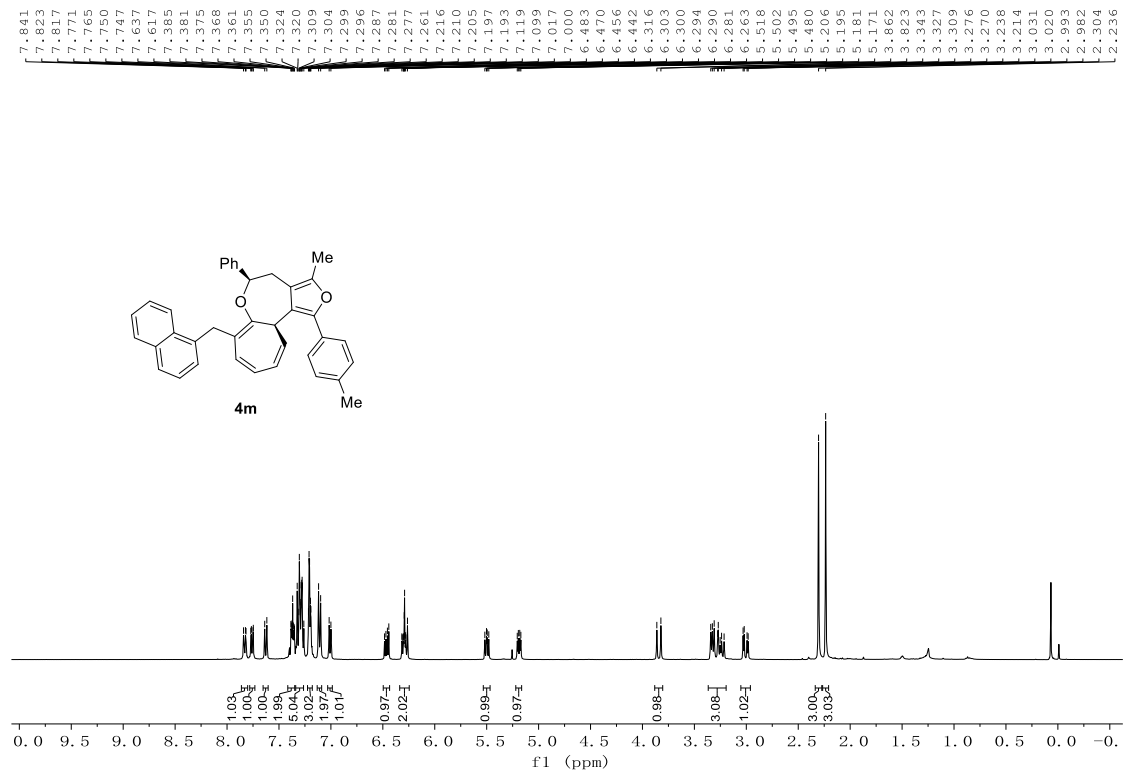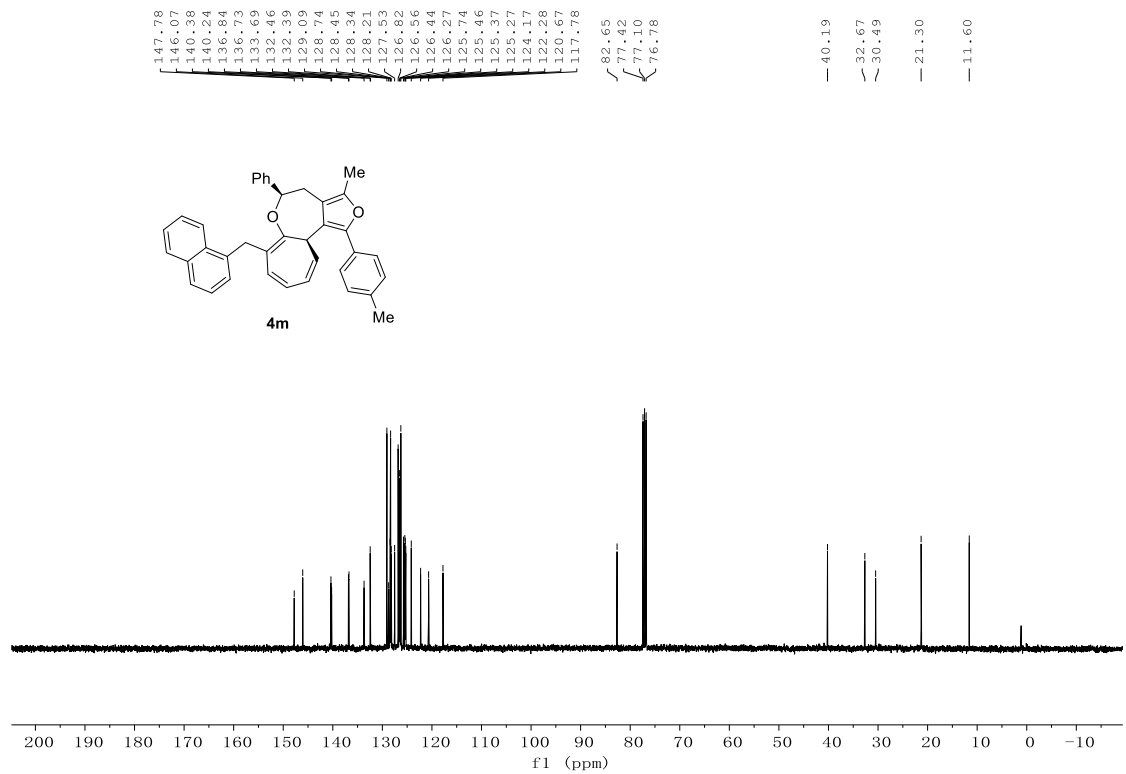

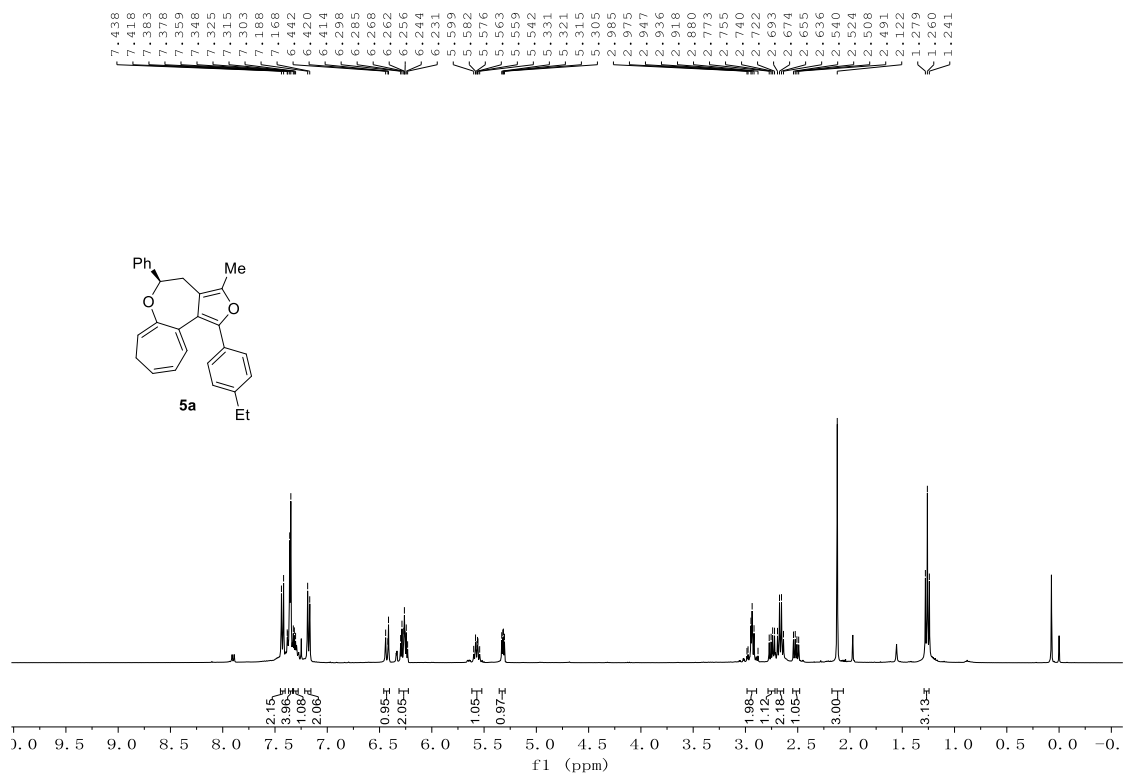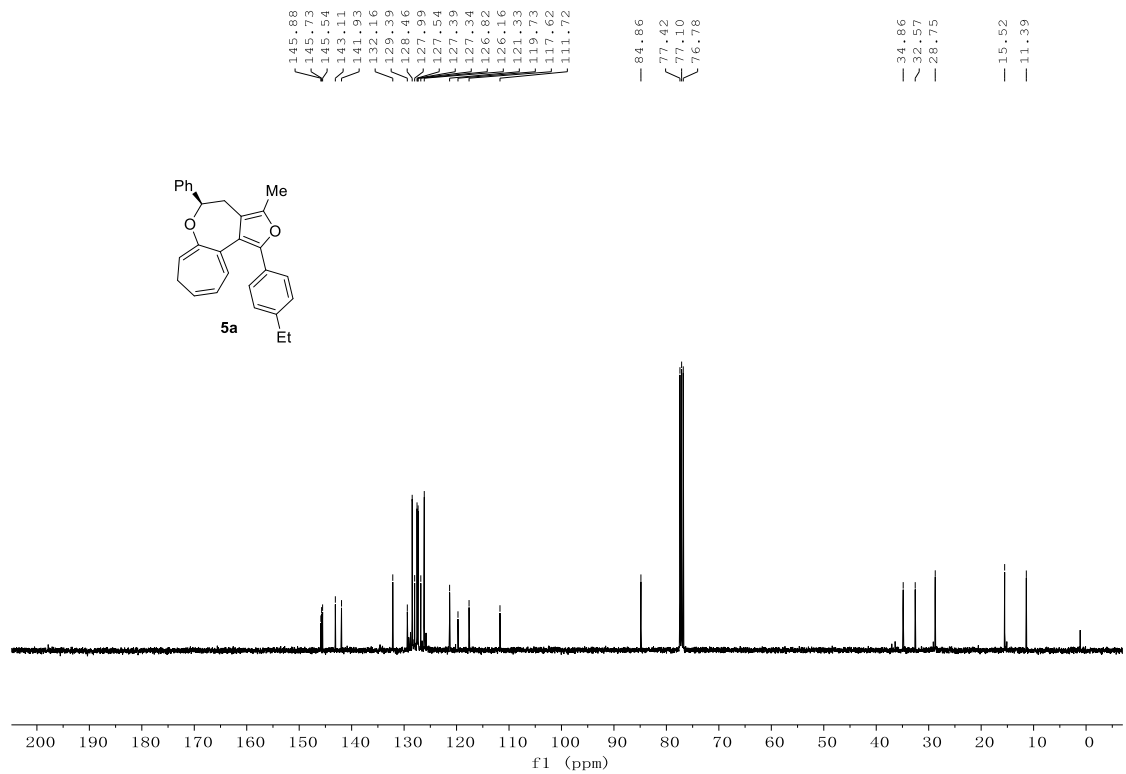

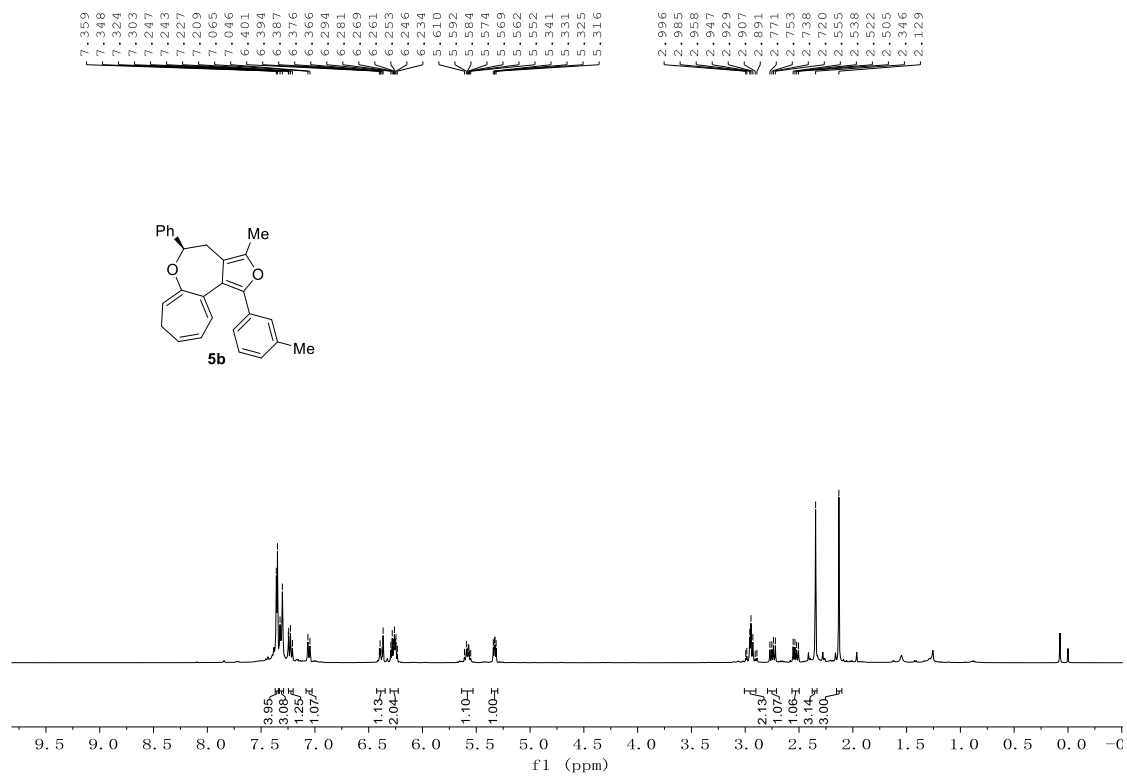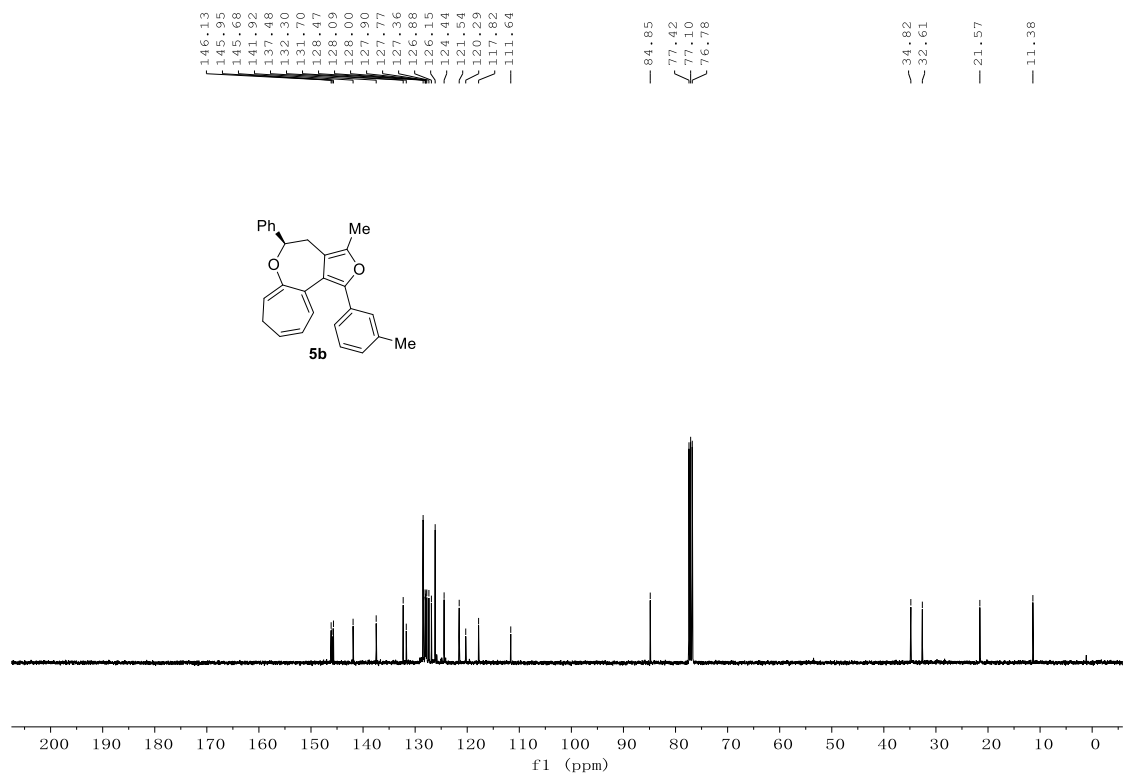



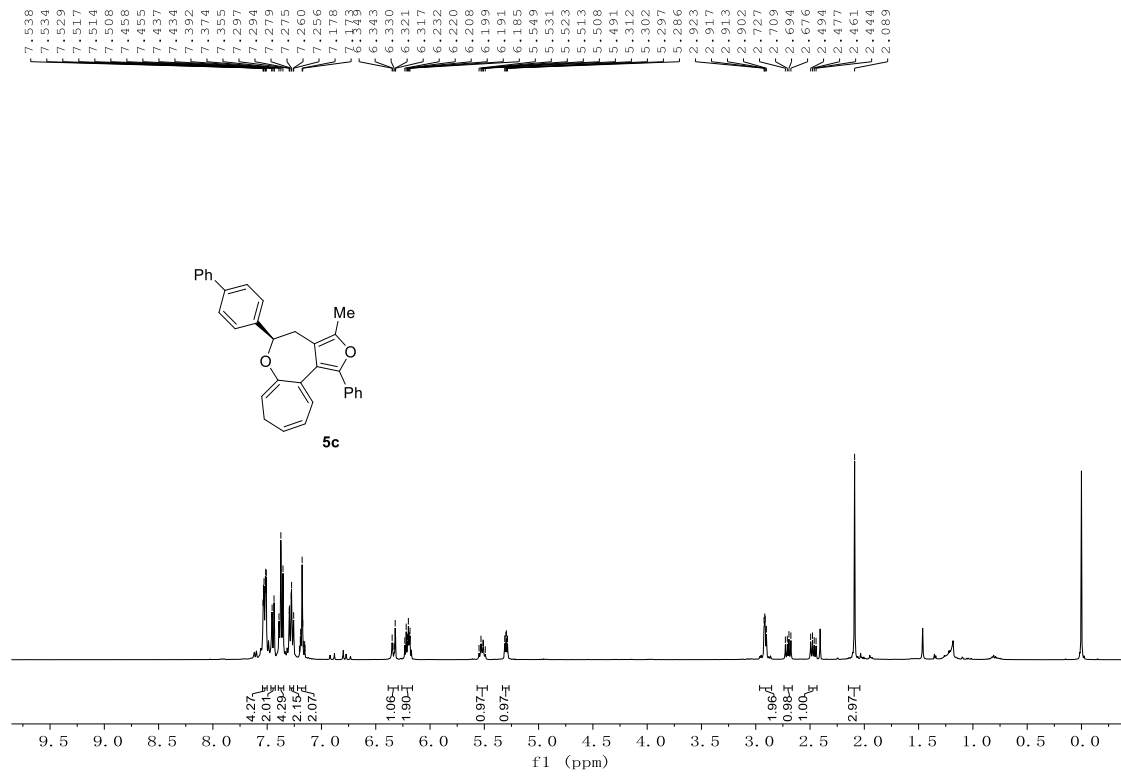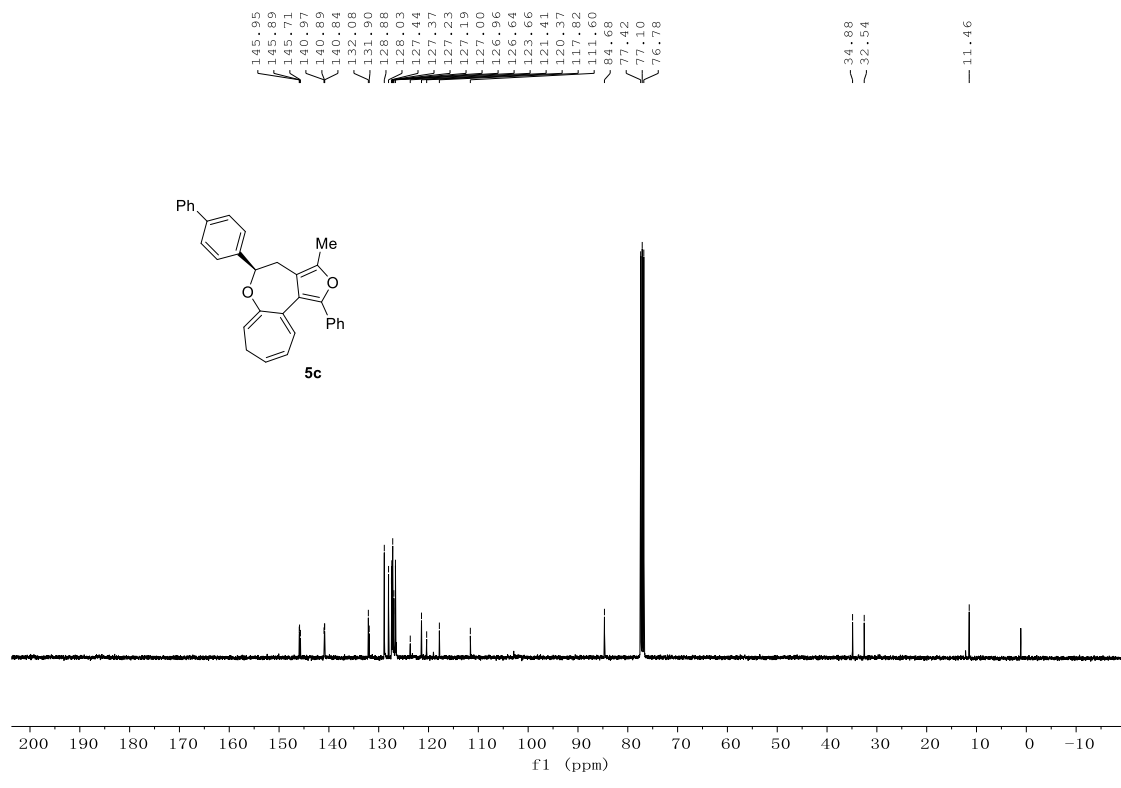

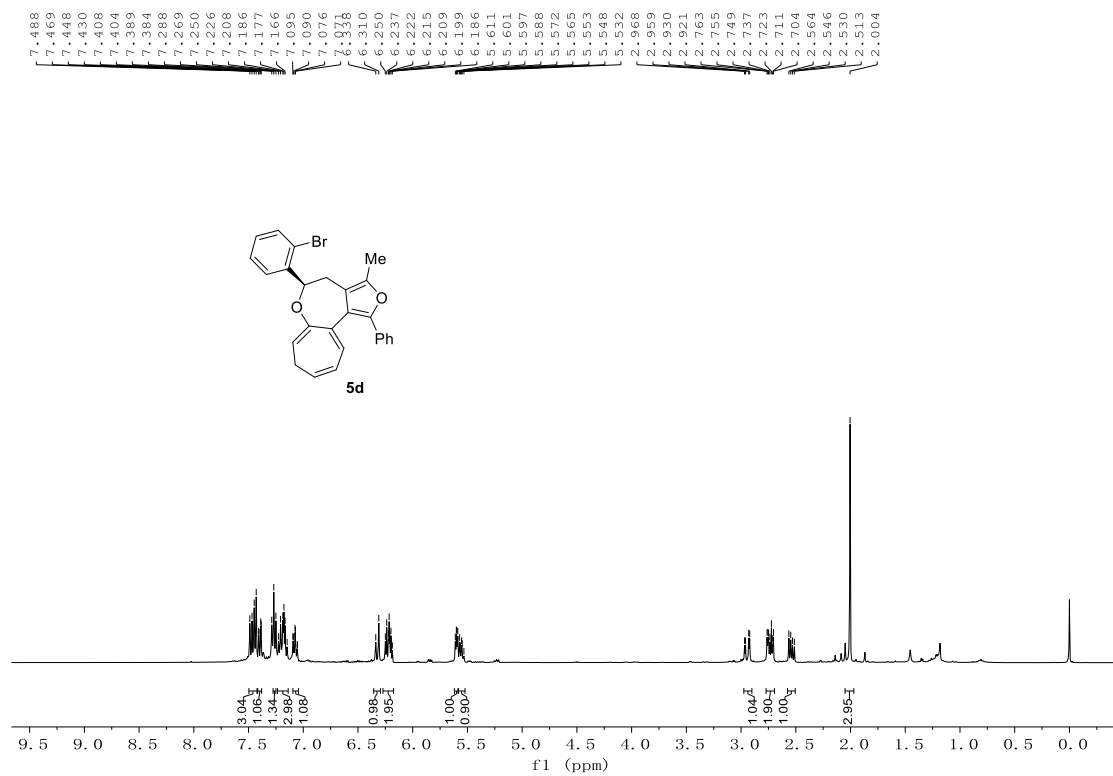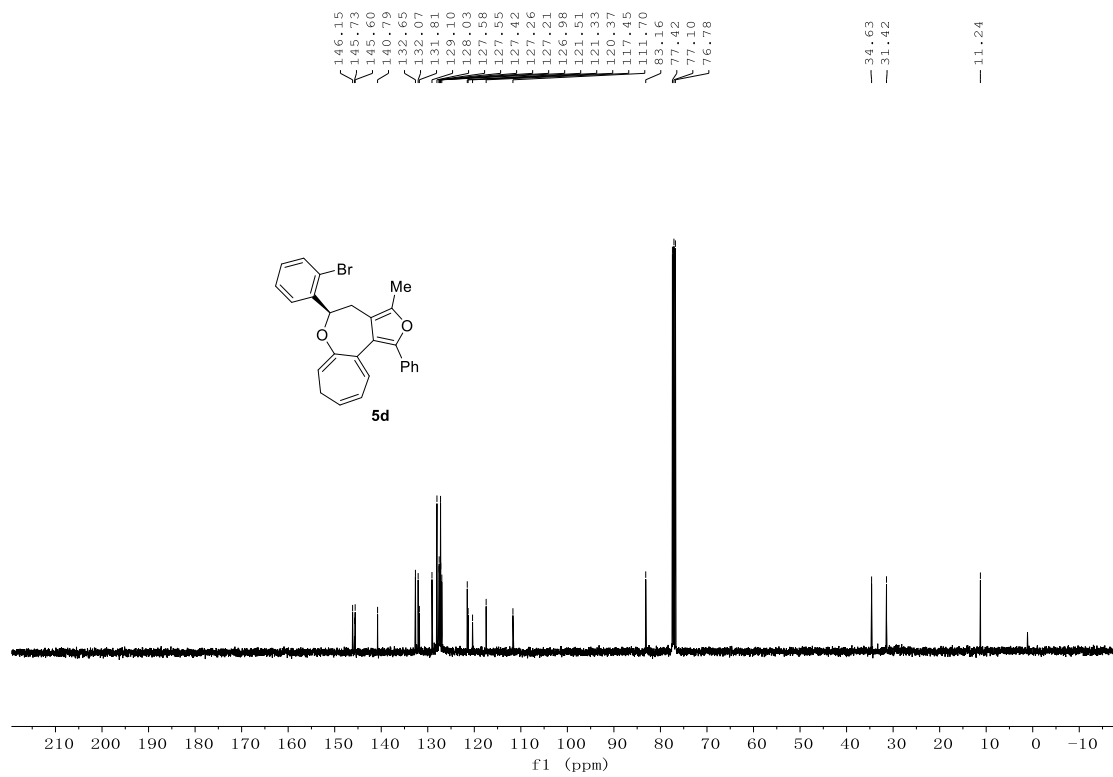

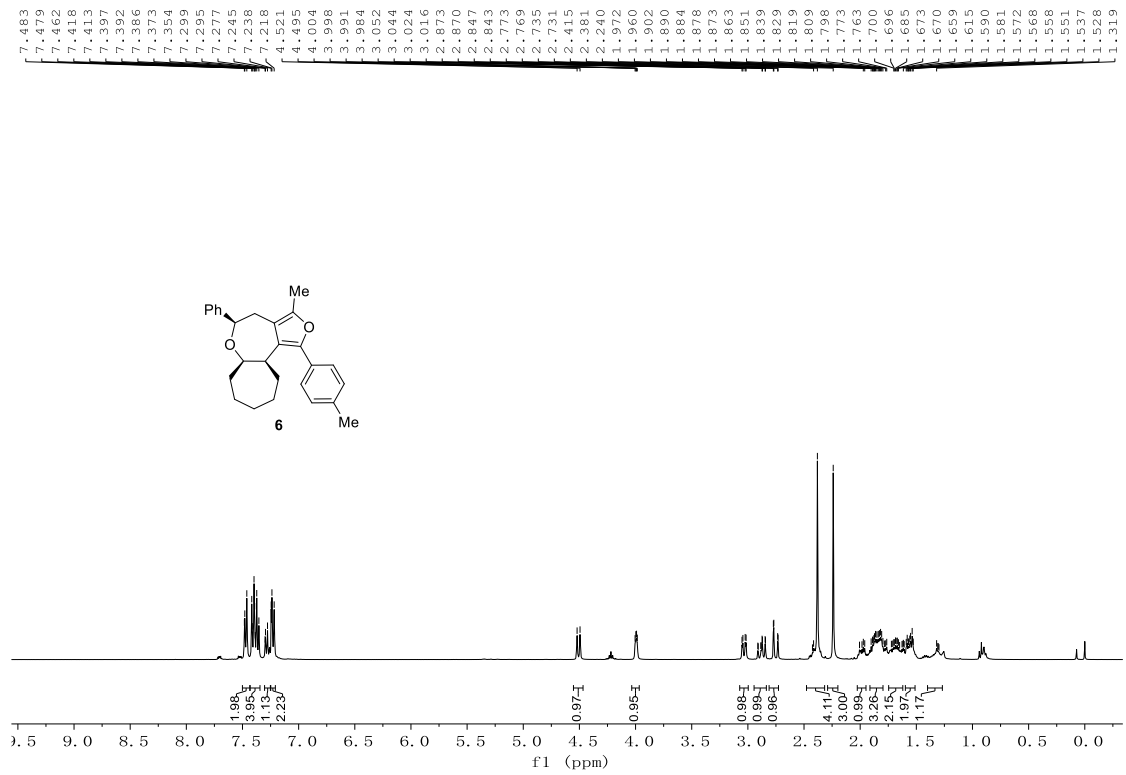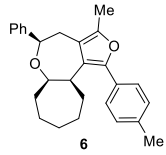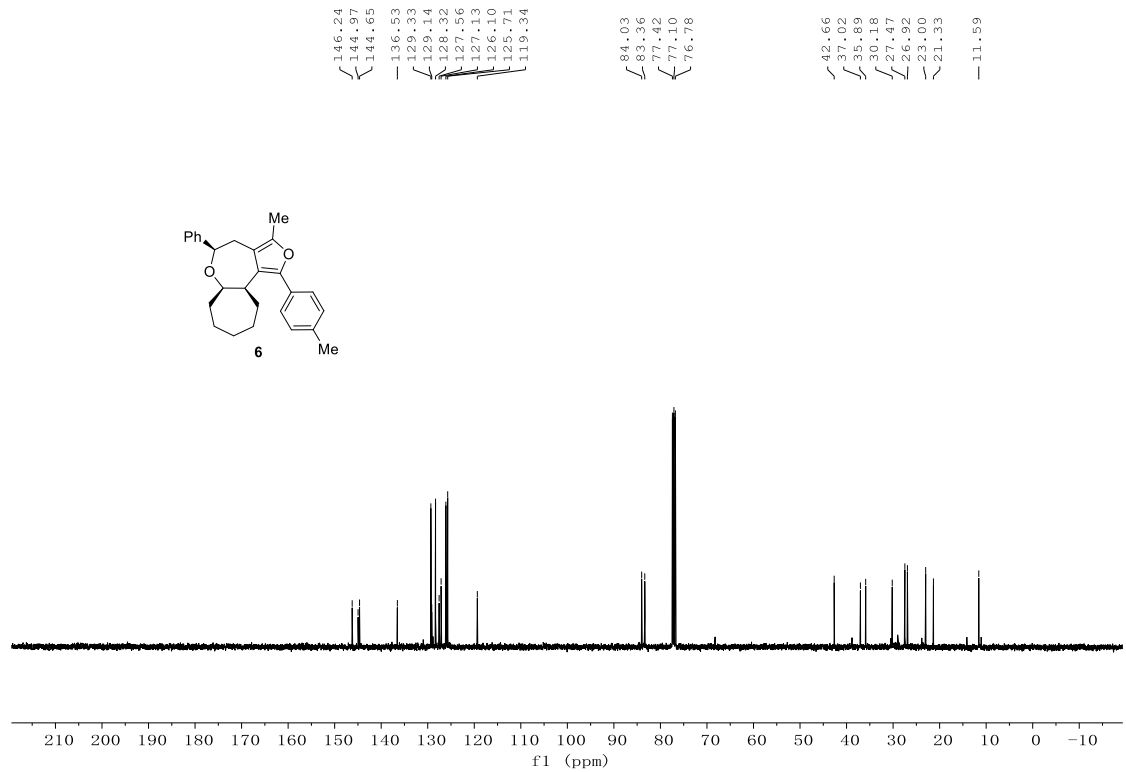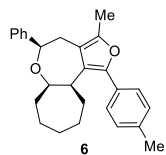

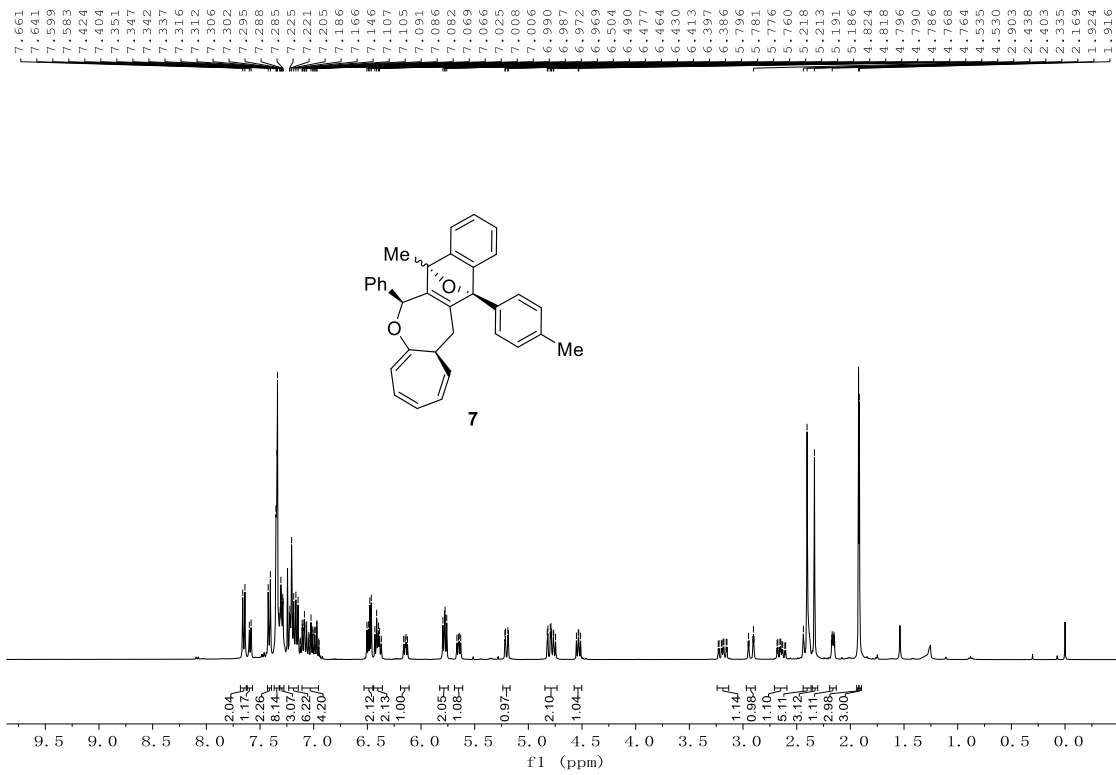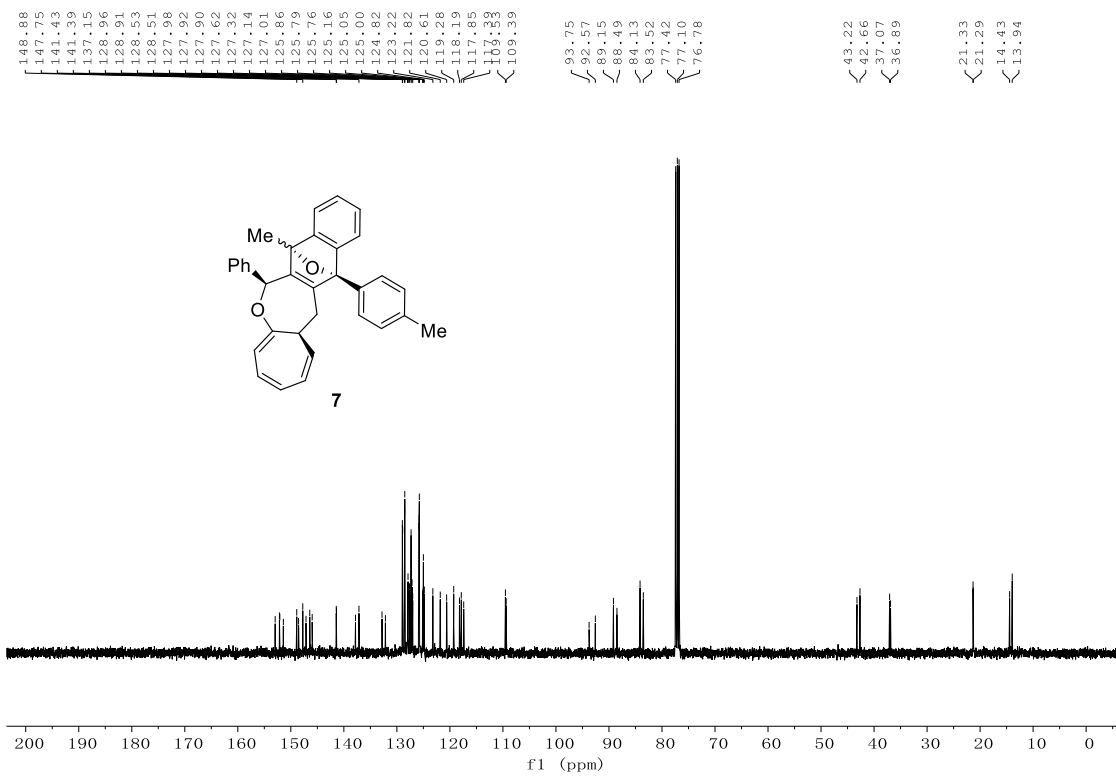

## 8. Copies of HPLC spectra

<Chromatogram>

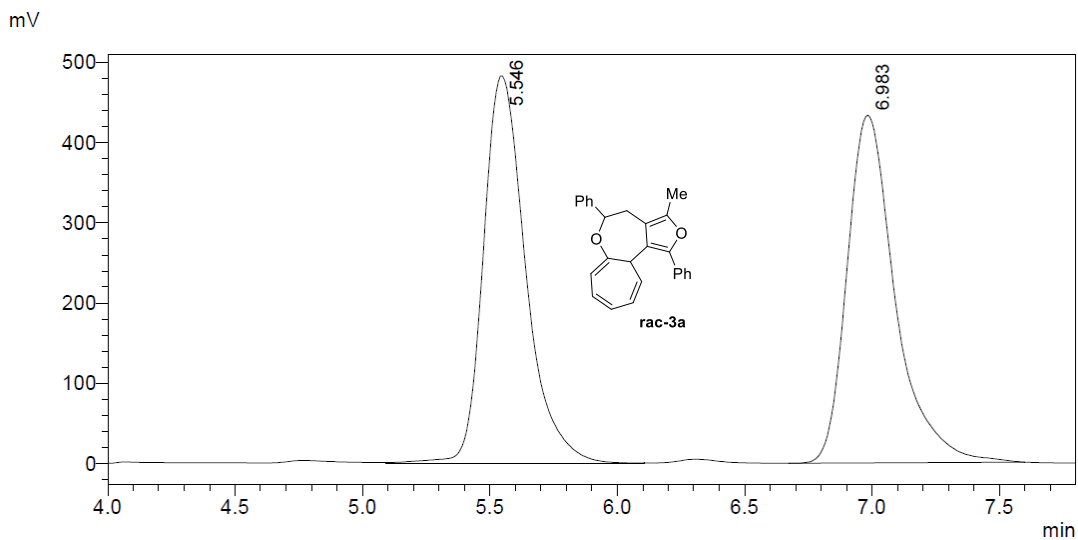

<Peak Table>

| Peak# | Ret. Time | Area     | Height | Area%   |
|-------|-----------|----------|--------|---------|
| 1     | 5.546     | 5620860  | 482935 | 49.653  |
| 2     | 6.983     | 5699436  | 433519 | 50.347  |
|       |           | 11320296 | 916453 | 100.000 |

<Chromatogram>

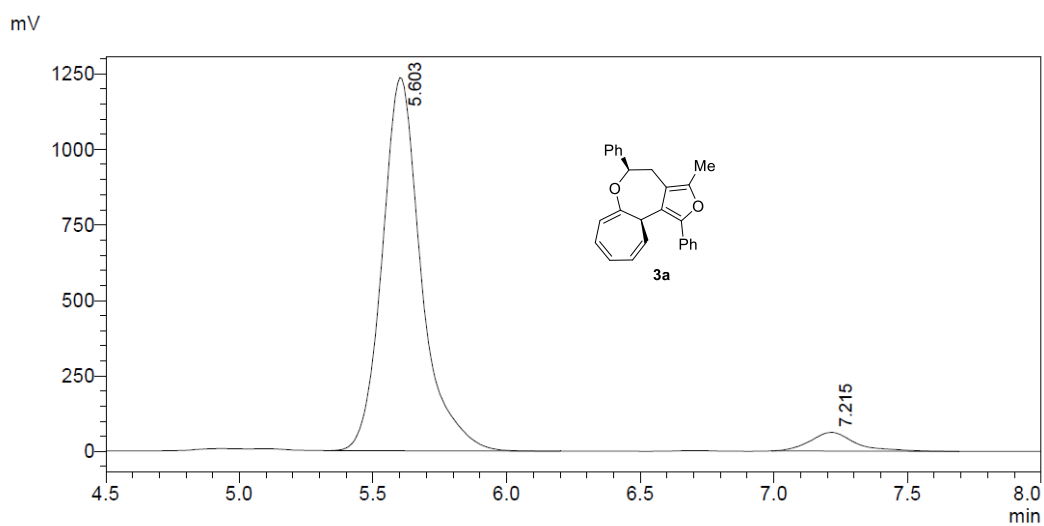

<Peak Table>

| Peak# | Ret. Time | Area     | Height  | Area%   |
|-------|-----------|----------|---------|---------|
| 1     | 5.603     | 12504098 | 1235300 | 94.500  |
| 2     | 7.215     | 727727   | 61883   | 5.500   |
|       |           | 13231824 | 1297182 | 100.000 |

<Chromatogram>

mV

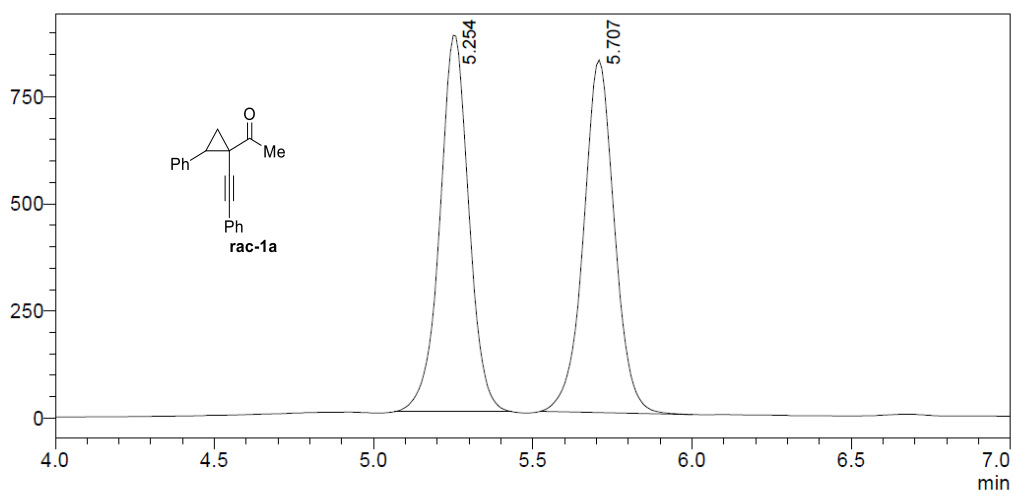

<Peak Table>

| Peak# | Ret. Time | Area     | Height  | Area%   |
|-------|-----------|----------|---------|---------|
| 1     | 5.254     | 5591068  | 879092  | 50.037  |
| 2     | 5.707     | 5582704  | 823311  | 49.963  |
|       |           | 11173772 | 1702403 | 100.000 |

<Chromatogram>

mV

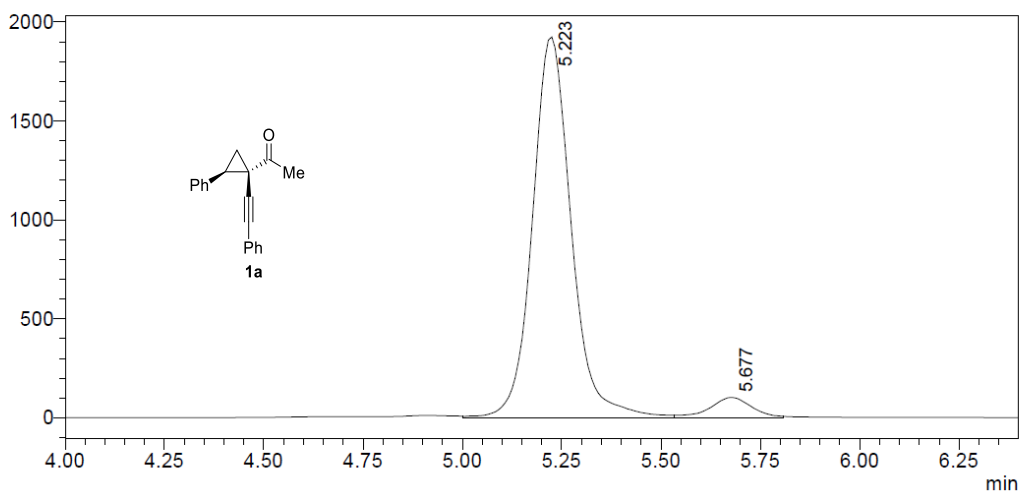

<Peak Table>

| Peak# | Ret. Time | Area     | Height  | Area%   |
|-------|-----------|----------|---------|---------|
| 1     | 5.223     | 13079845 | 1925536 | 94.635  |
| 2     | 5.677     | 741519   | 101879  | 5.365   |
|       |           | 13821364 | 2027415 | 100.000 |

<Chromatogram>

mV

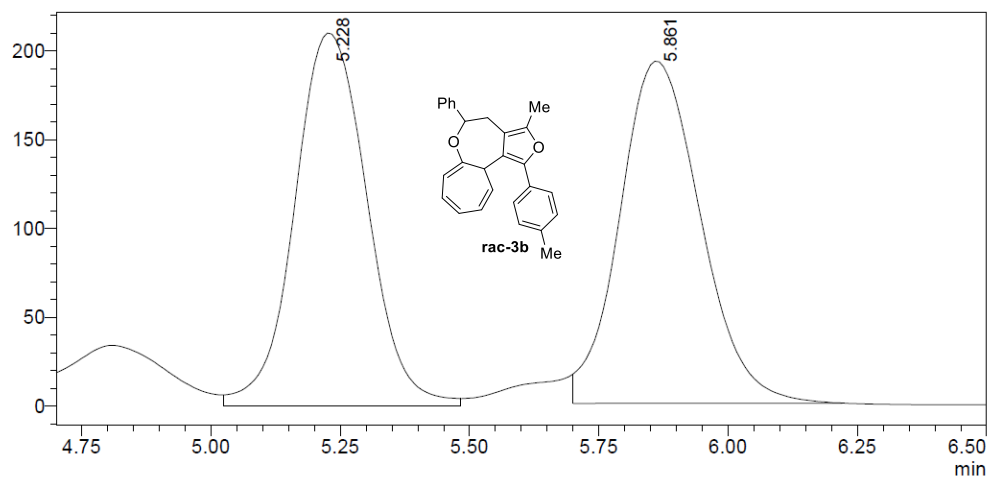

<Peak Table>

| Peak# | Ret. Time | Area    | Height | Area%   |
|-------|-----------|---------|--------|---------|
| 1     | 5.228     | 2055520 | 210033 | 49.482  |
| 2     | 5.861     | 2098532 | 192624 | 50.518  |
|       |           | 4154052 | 402658 | 100.000 |

<Chromatogram>

mV

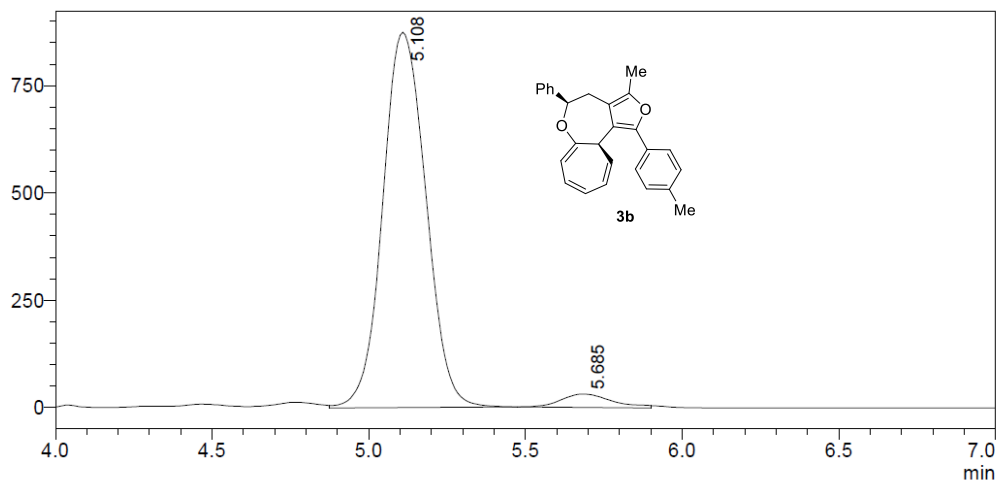

<Peak Table>

| Peak# | Ret. Time | Area    | Height | Area%   |
|-------|-----------|---------|--------|---------|
| 1     | 5.108     | 8376088 | 873891 | 95.947  |
| 2     | 5.685     | 353803  | 31190  | 4.053   |
|       |           | 8729891 | 905082 | 100.000 |

<Chromatogram>

mV

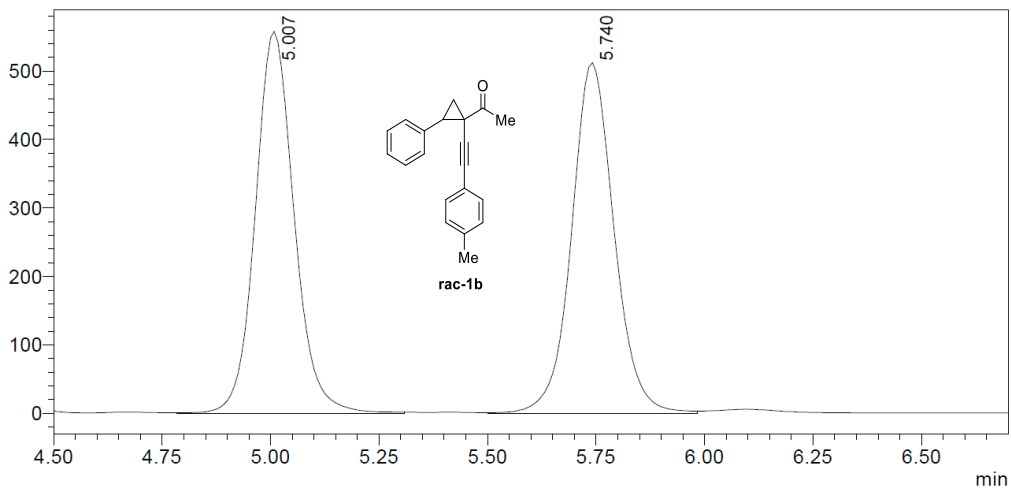

<Peak Table>

| Peak# | Ret. Time | Area    | Height  | Area%   |
|-------|-----------|---------|---------|---------|
| 1     | 5.007     | 3475061 | 558151  | 49.858  |
| 2     | 5.740     | 3494896 | 512551  | 50.142  |
|       |           | 6969958 | 1070702 | 100.000 |

<Chromatogram>

mV

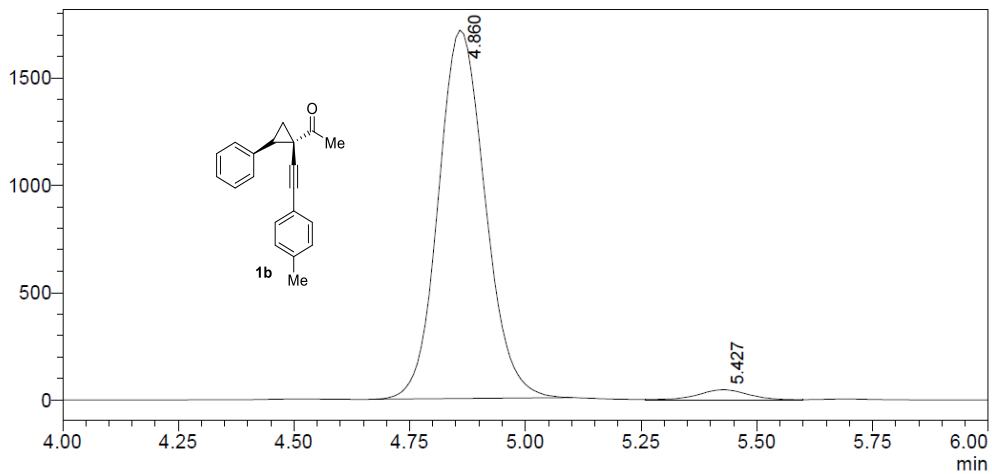

<Peak Table>

| Peak# | Ret. Time | Area     | Height  | Area%   |
|-------|-----------|----------|---------|---------|
| 1     | 4.860     | 12083746 | 1715256 | 96.943  |
| 2     | 5.427     | 381094   | 48427   | 3.057   |
|       |           | 12464840 | 1763683 | 100.000 |



<Chromatogram>

mV

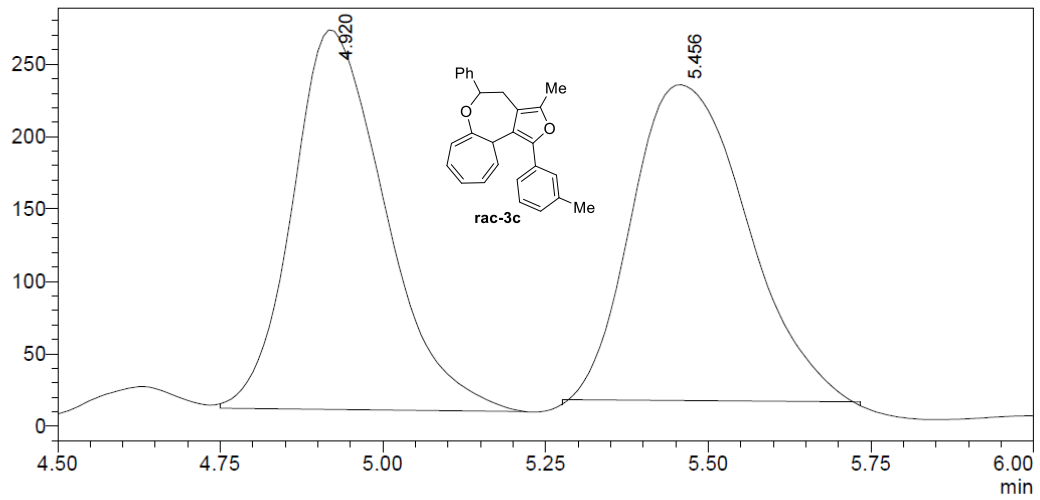

<Peak Table>

| Peak# | Ret. Time | Area    | Height | Area%   |
|-------|-----------|---------|--------|---------|
| 1     | 4.920     | 2597370 | 262079 | 49.140  |
| 2     | 5.456     | 2688240 | 218147 | 50.860  |
|       |           | 5285610 | 480227 | 100.000 |

<Chromatogram>

mV

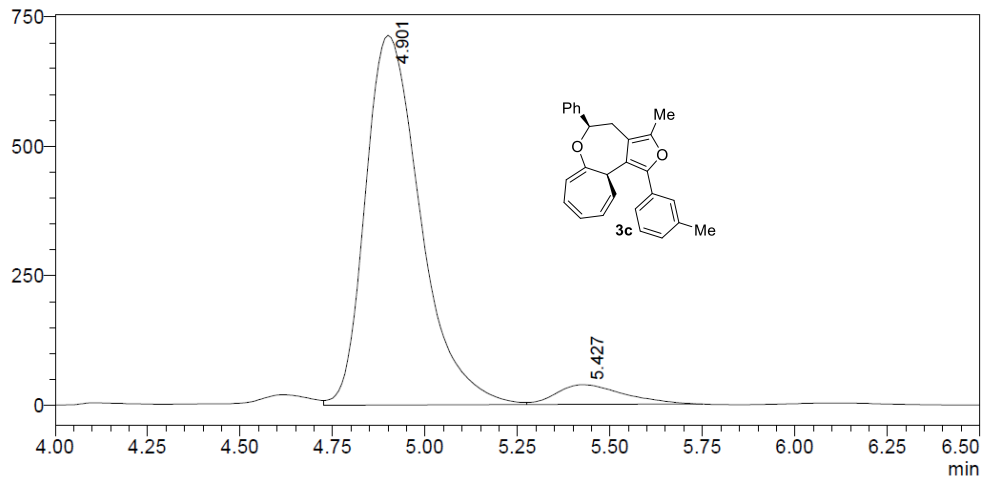

<Peak Table>

| Peak# | Ret. Time | Area    | Height | Area%   |
|-------|-----------|---------|--------|---------|
| 1     | 4.901     | 7411552 | 714424 | 93.814  |
| 2     | 5.427     | 488723  | 38152  | 6.186   |
|       |           | 7900276 | 752576 | 100.000 |

<Chromatogram>

mV

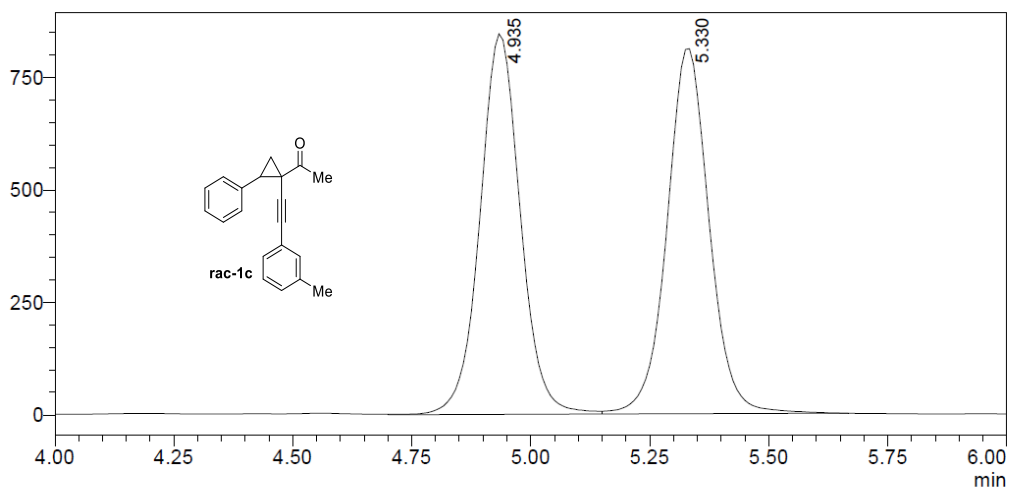

<Peak Table>

| Peak# | Ret. Time | Area     | Height  | Area%   |
|-------|-----------|----------|---------|---------|
| 1     | 4.935     | 4996981  | 845986  | 49.887  |
| 2     | 5.330     | 5019603  | 811509  | 50.113  |
|       |           | 10016584 | 1657494 | 100.000 |

<Chromatogram>

mV

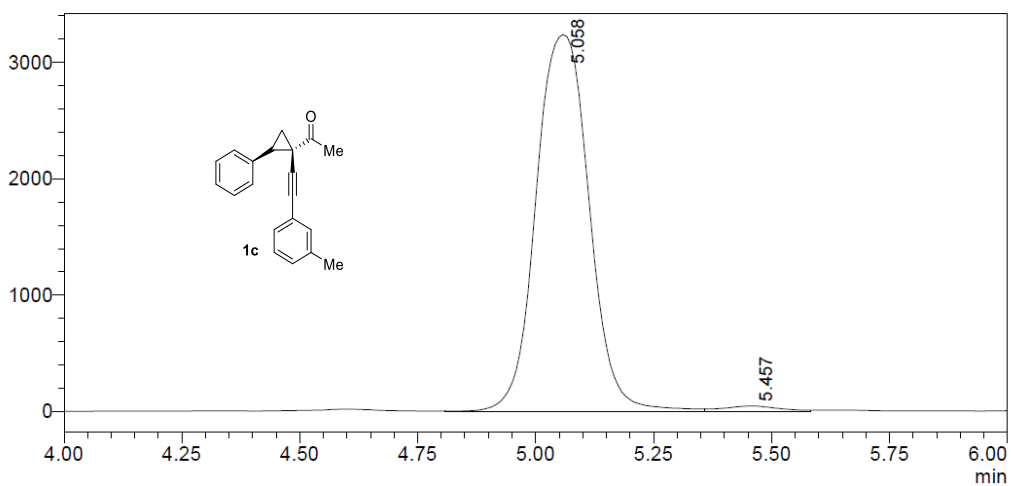

<Peak Table>

| Peak# | Ret. Time | Area     | Height  | Area%   |
|-------|-----------|----------|---------|---------|
| 1     | 5.058     | 25377505 | 3239751 | 98.481  |
| 2     | 5.457     | 391426   | 47039   | 1.519   |
|       |           | 25768931 | 3286790 | 100.000 |

<Chromatogram>

mV

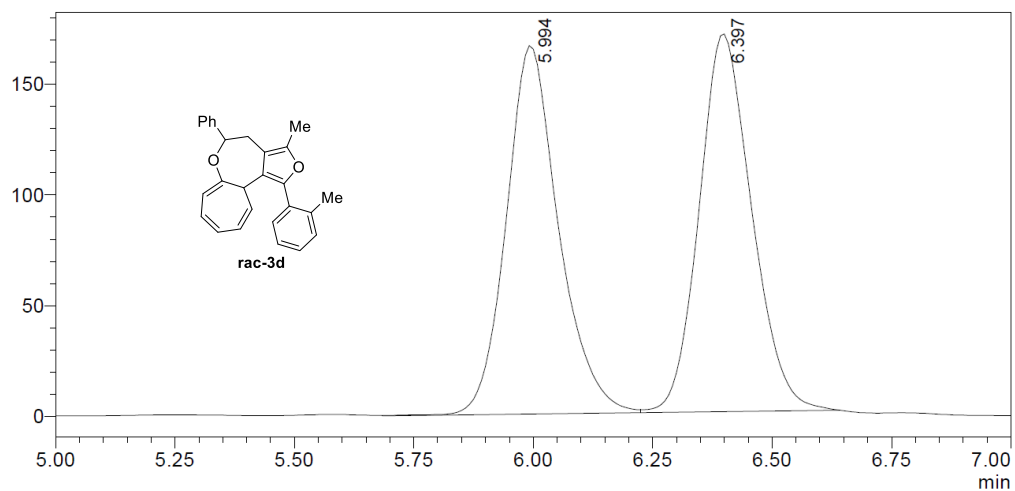

<Peak Table>

| Peak# | Ret. Time | Area    | Height | Area%   |
|-------|-----------|---------|--------|---------|
| 1     | 5.994     | 1270482 | 166244 | 49.321  |
| 2     | 6.397     | 1305452 | 170501 | 50.679  |
|       |           | 2575934 | 336746 | 100.000 |

<Chromatogram>

mV

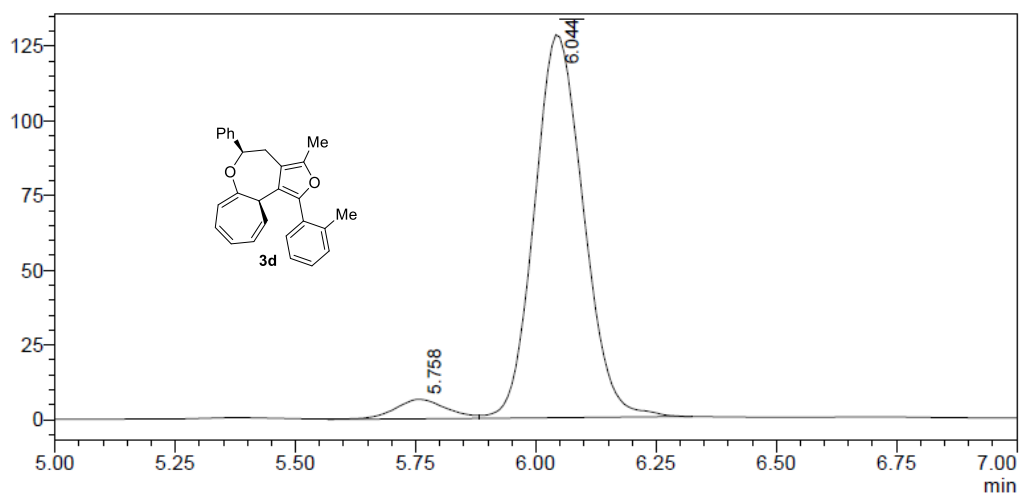

<Peak Table>

| Peak# | Ret. Time | Area   | Height | Area%   |
|-------|-----------|--------|--------|---------|
| 1     | 5.758     | 49030  | 6528   | 5.120   |
| 2     | 6.044     | 908520 | 128182 | 94.880  |
|       |           | 957551 | 134710 | 100.000 |

<Chromatogram>

mV

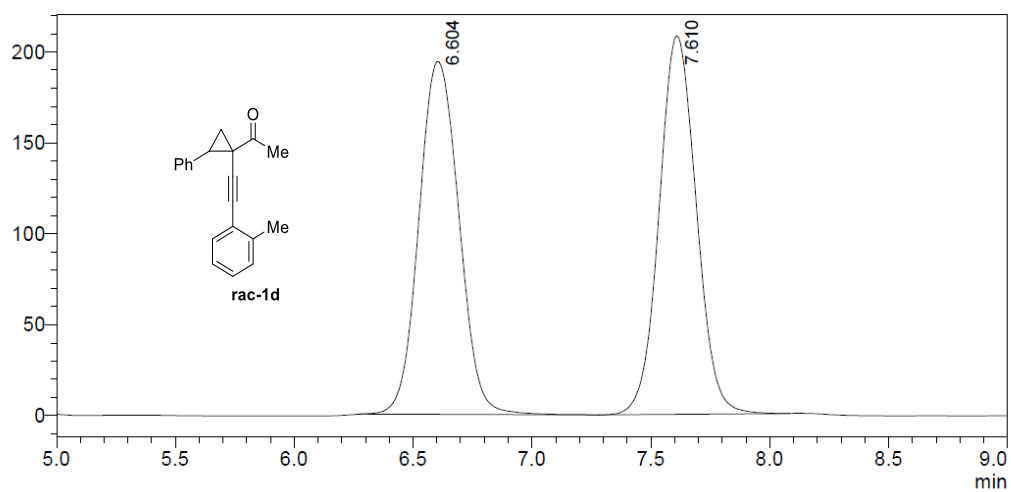

<Peak Table>

| Peak# | Ret. Time | Area    | Height | Area%   |
|-------|-----------|---------|--------|---------|
| 1     | 6.604     | 2269904 | 193986 | 50.068  |
| 2     | 7.610     | 2263774 | 208146 | 49.932  |
|       |           | 4533678 | 402132 | 100.000 |

<Chromatogram>

mV

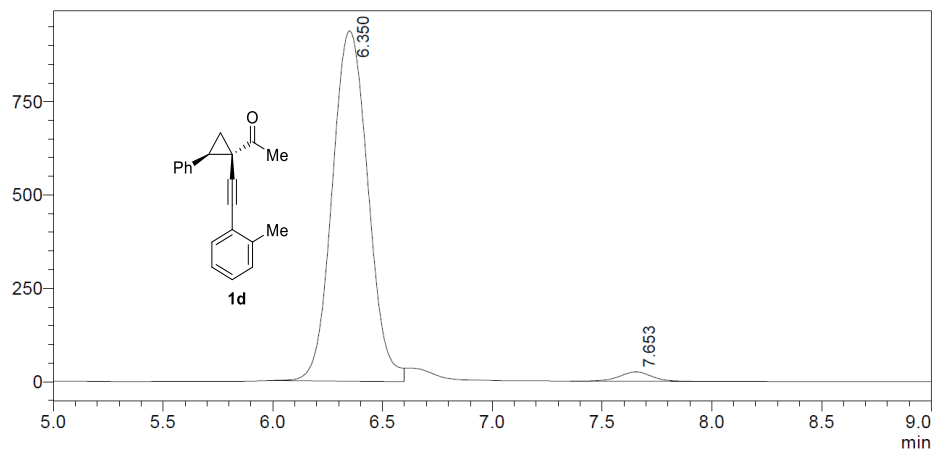

<Peak Table>

| Peak# | Ret. Time | Area     | Height | Area%   |
|-------|-----------|----------|--------|---------|
| 1     | 6.350     | 10628025 | 938743 | 97.666  |
| 2     | 7.653     | 253995   | 24906  | 2.334   |
|       |           | 10882019 | 963649 | 100.000 |

<Chromatogram>

mV

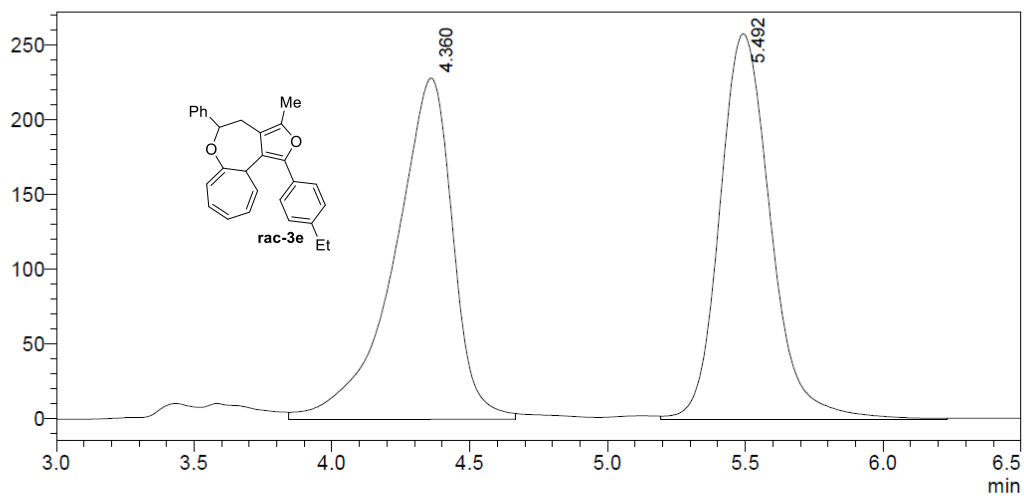

<Peak Table>

| Peak# | Ret. Time | Area    | Height | Area%   |
|-------|-----------|---------|--------|---------|
| 1     | 4.360     | 3396697 | 228599 | 50.533  |
| 2     | 5.492     | 3325074 | 258282 | 49.467  |
|       |           | 6721771 | 486881 | 100.000 |

<Chromatogram>

mV

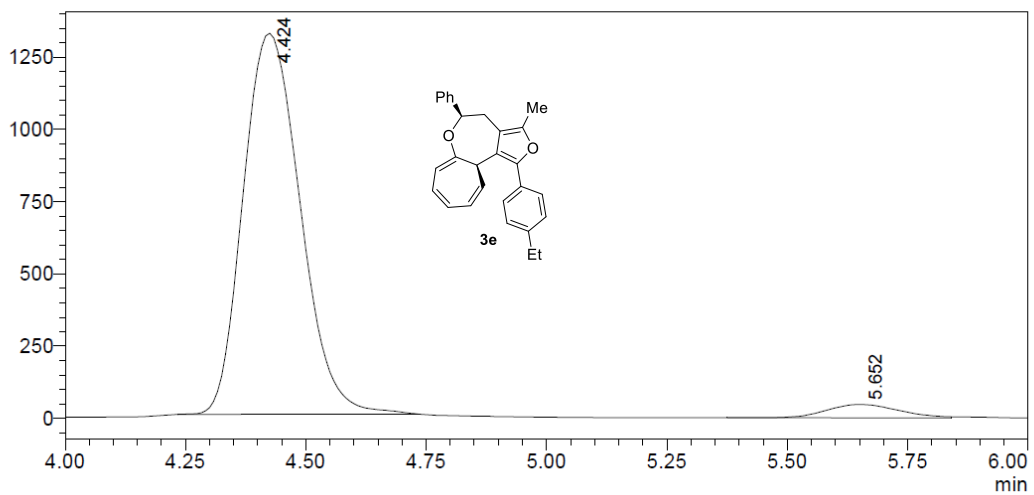

<Peak Table>

| Peak# | Ret. Time | Area     | Height  | Area%   |
|-------|-----------|----------|---------|---------|
| 1     | 4.424     | 10878058 | 1319285 | 95.705  |
| 2     | 5.652     | 488126   | 46636   | 4.295   |
|       |           | 11366184 | 1365921 | 100.000 |

<Chromatogram>

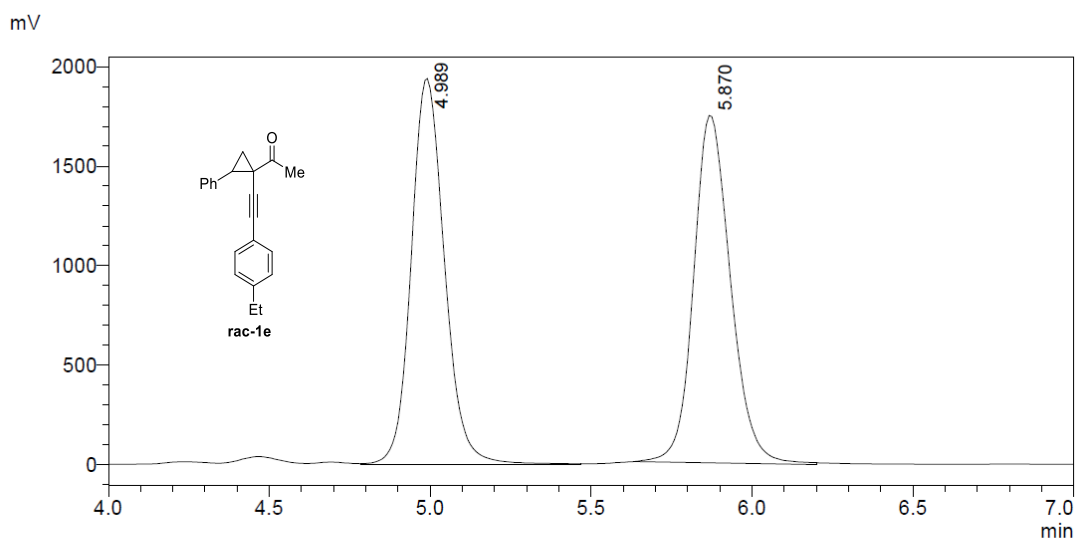

<Peak Table>

| Peak# | Ret. Time | Area     | Height  | Area%   |
|-------|-----------|----------|---------|---------|
| 1     | 4.989     | 13992583 | 1940578 | 50.103  |
| 2     | 5.870     | 13935130 | 1744909 | 49.897  |
|       |           | 27927713 | 3685487 | 100.000 |

<Chromatogram>

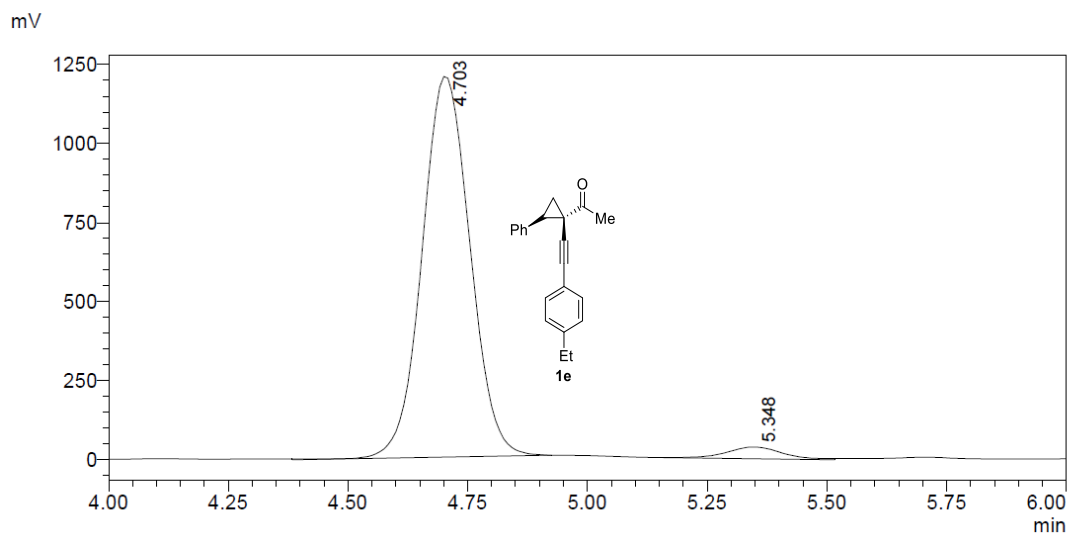

<Peak Table>

| Peak# | Ret. Time | Area    | Height  | Area%   |
|-------|-----------|---------|---------|---------|
| 1     | 4.703     | 8384148 | 1204282 | 96.560  |
| 2     | 5.348     | 298697  | 37359   | 3.440   |
|       |           | 8682846 | 1241641 | 100.000 |

<Chromatogram>

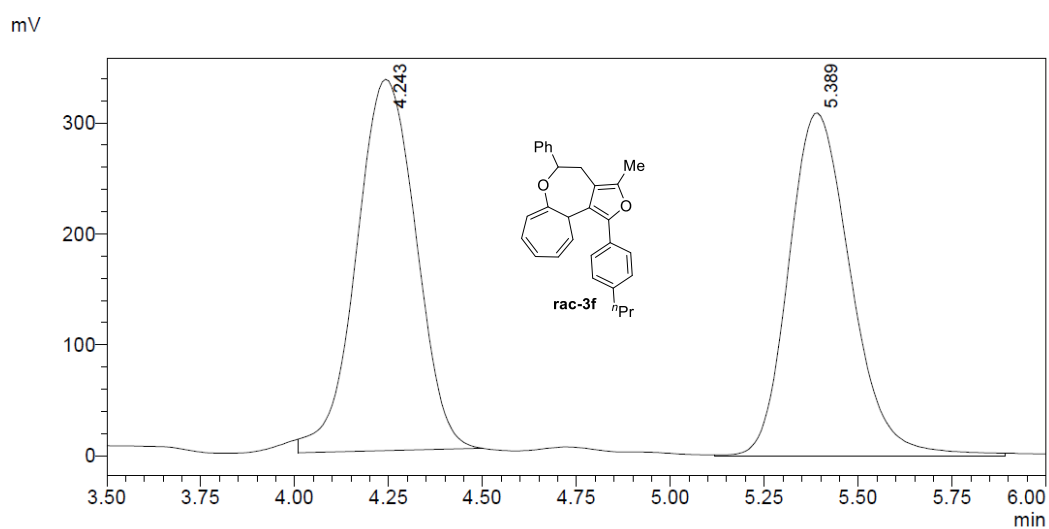

<Peak Table>

| Peak# | Ret. Time | Area    | Height | Area%   |
|-------|-----------|---------|--------|---------|
| 1     | 4.243     | 3696786 | 334853 | 50.891  |
| 2     | 5.389     | 3567384 | 309468 | 49.109  |
|       |           | 7264170 | 644321 | 100.000 |

<Chromatogram>

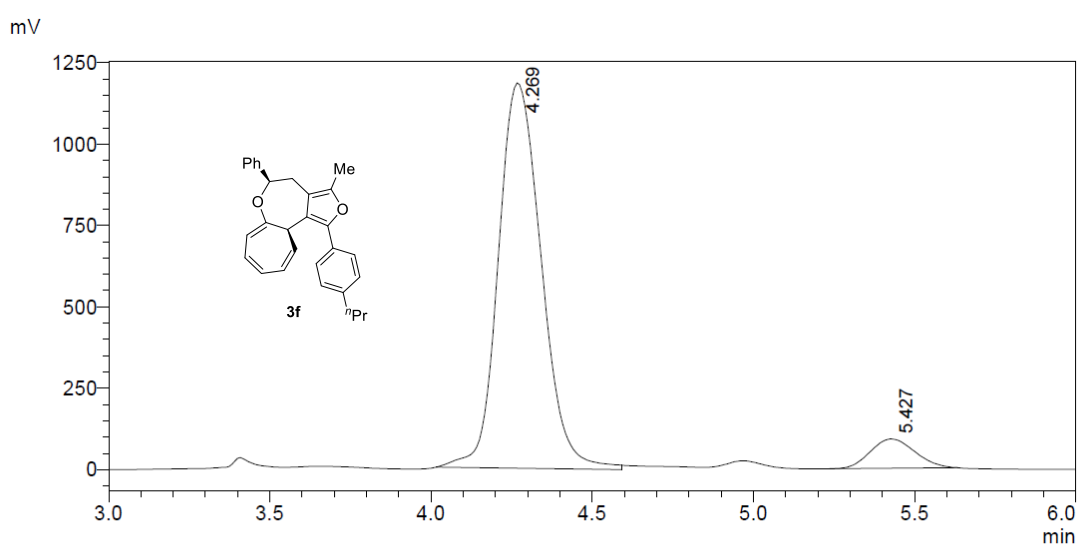

<Peak Table>

| Peak# | Ret. Time | Area     | Height  | Area%   |
|-------|-----------|----------|---------|---------|
| 1     | 4.269     | 10969755 | 1184280 | 92.636  |
| 2     | 5.427     | 872025   | 90432   | 7.364   |
|       |           | 11841780 | 1274713 | 100.000 |

<Chromatogram>

mV

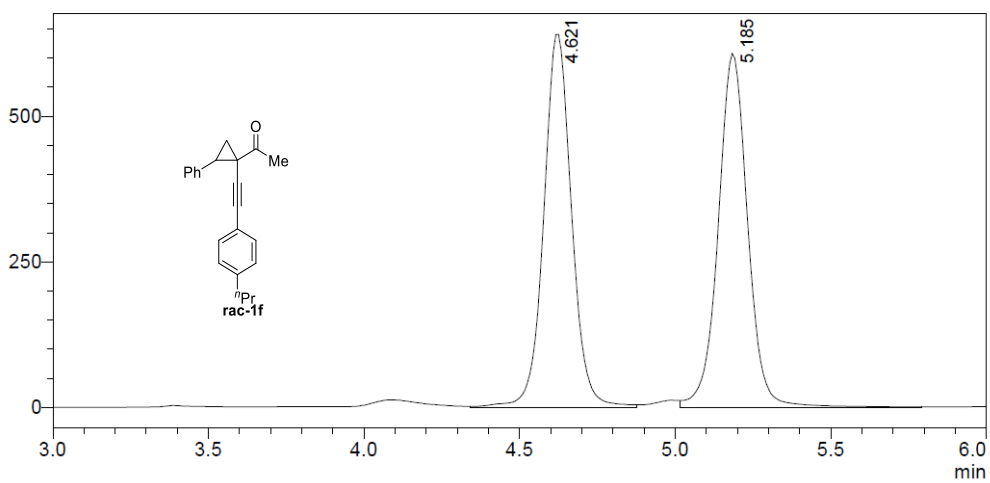

<Peak Table>

| Peak# | Ret. Time | Area    | Height  | Area%   |
|-------|-----------|---------|---------|---------|
| 1     | 4.621     | 3997057 | 639988  | 49.866  |
| 2     | 5.185     | 4018500 | 607744  | 50.134  |
|       |           | 8015557 | 1247732 | 100.000 |

<Chromatogram>

mV

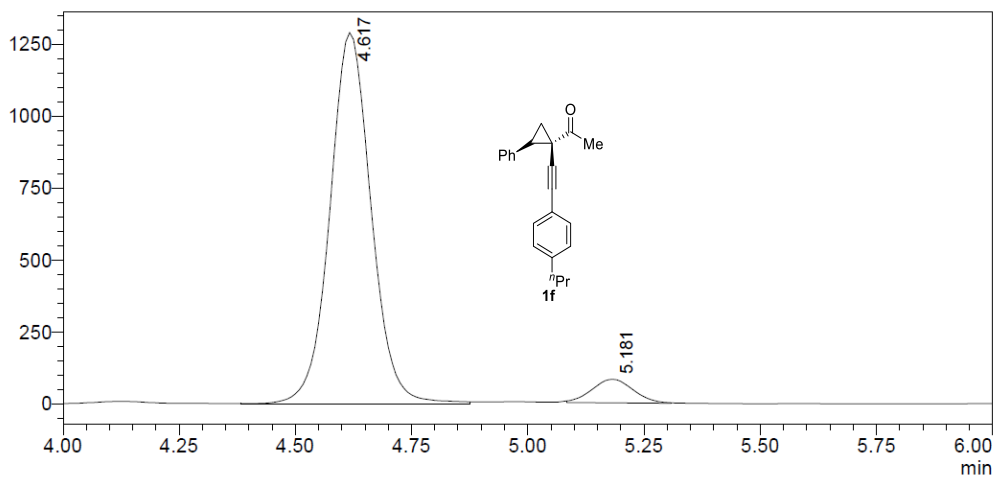

<Peak Table>

| Peak# | Ret. Time | Area    | Height  | Area%   |
|-------|-----------|---------|---------|---------|
| 1     | 4.617     | 7992679 | 1290926 | 94.027  |
| 2     | 5.181     | 507688  | 82385   | 5.973   |
|       |           | 8500367 | 1373311 | 100.000 |



<Chromatogram>

mV

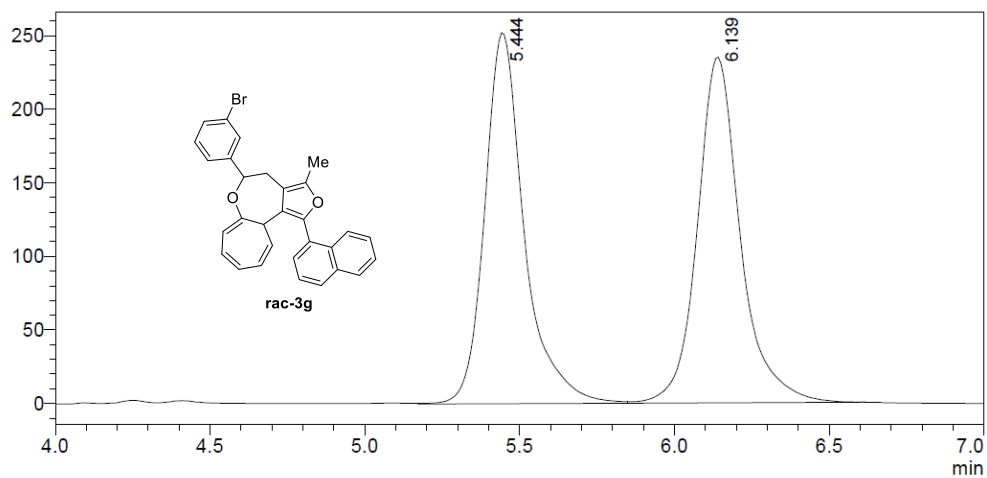

<Peak Table>

| Peak# | Ret. Time | Area    | Height | Area%   |
|-------|-----------|---------|--------|---------|
| 1     | 5.444     | 2234204 | 252067 | 49.624  |
| 2     | 6.139     | 2268020 | 235063 | 50.376  |
|       |           | 4502225 | 487130 | 100.000 |

<Chromatogram>

mV

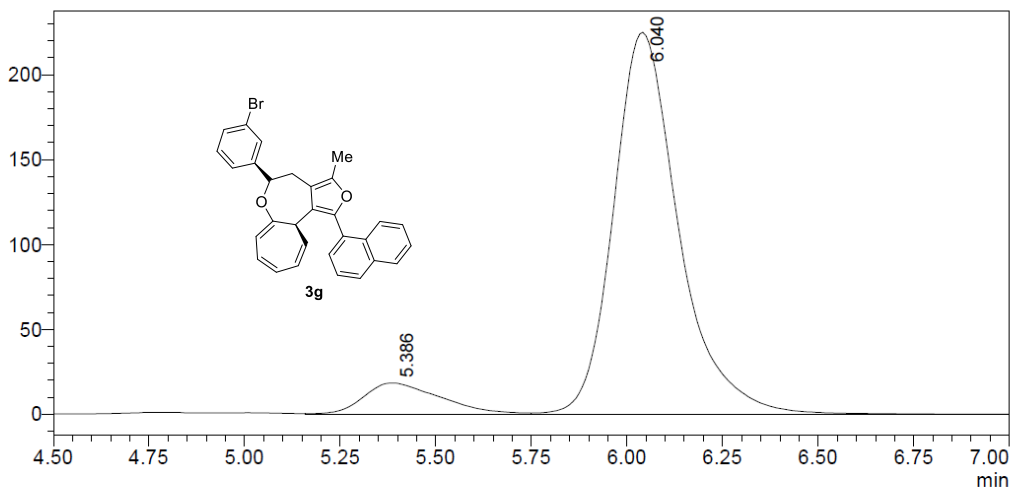

<Peak Table>

| Peak# | Ret. Time | Area    | Height | Area%   |
|-------|-----------|---------|--------|---------|
| 1     | 5.386     | 261674  | 18569  | 8.923   |
| 2     | 6.040     | 2671045 | 225103 | 91.077  |
|       |           | 2932720 | 243672 | 100.000 |

<Chromatogram>

mV

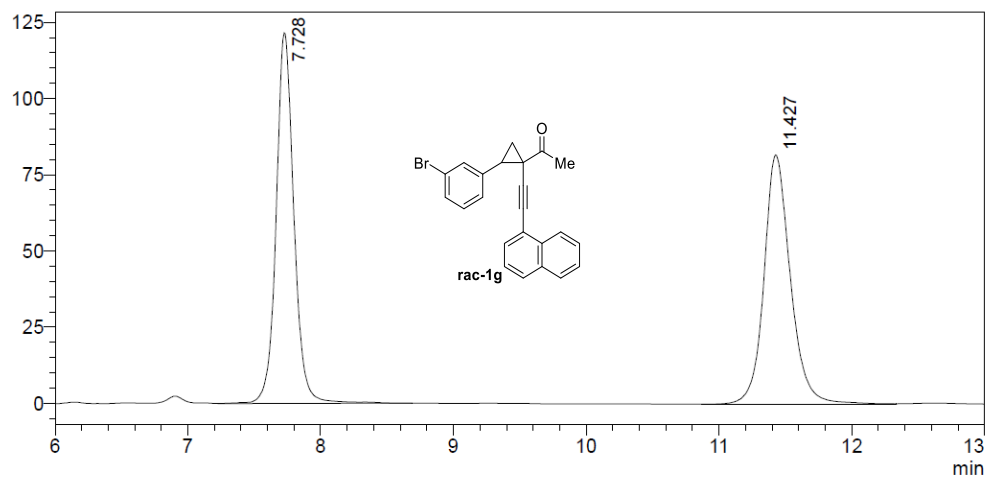

<Peak Table>

| Peak# | Ret. Time | Area    | Height | Area%   |
|-------|-----------|---------|--------|---------|
| 1     | 7.728     | 1130506 | 121589 | 49.893  |
| 2     | 11.427    | 1135374 | 81798  | 50.107  |
|       |           | 2265880 | 203387 | 100.000 |

<Chromatogram>

mV

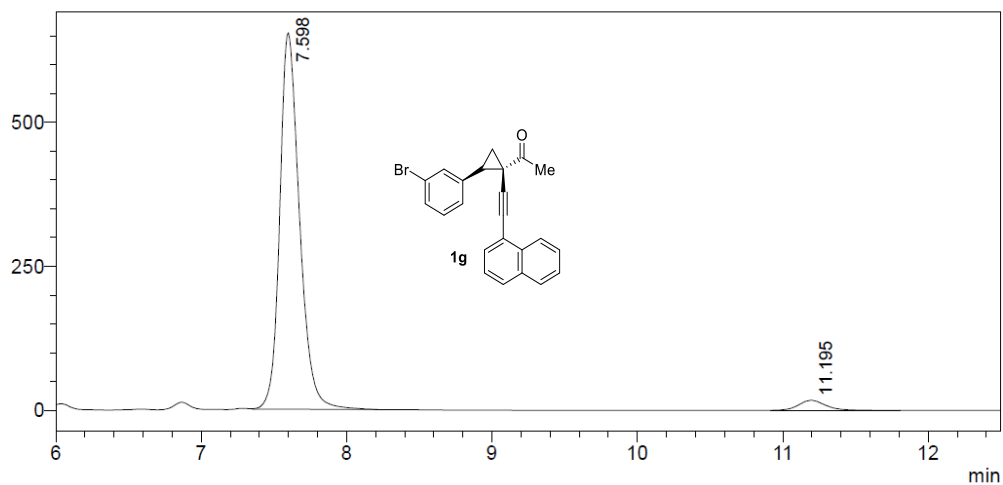

<Peak Table>

| Peak# | Ret. Time | Area    | Height | Area%   |
|-------|-----------|---------|--------|---------|
| 1     | 7.598     | 6164321 | 652735 | 96.343  |
| 2     | 11.195    | 234001  | 17558  | 3.657   |
|       |           | 6398322 | 670293 | 100.000 |

<Chromatogram>

mV

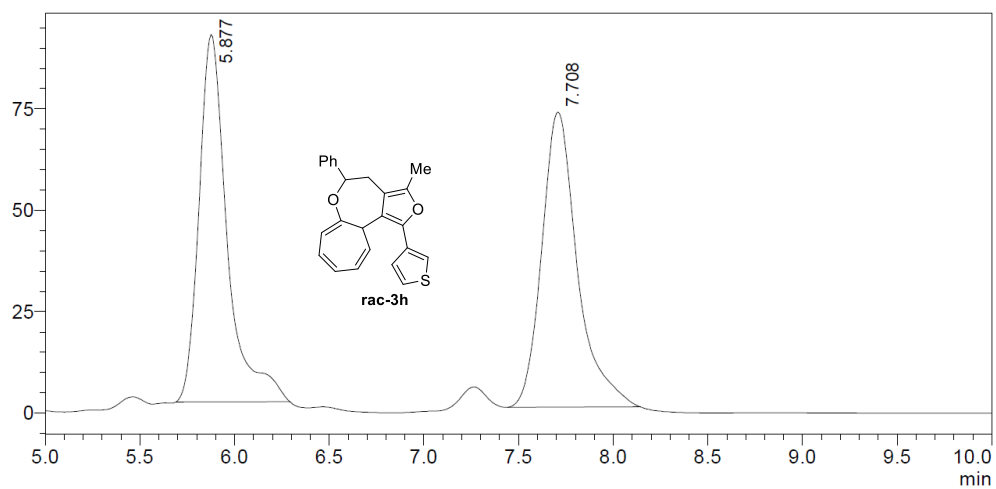

<Peak Table>

| Peak# | Ret. Time | Area    | Height | Area%   |
|-------|-----------|---------|--------|---------|
| 1     | 5.877     | 940250  | 90571  | 49.712  |
| 2     | 7.708     | 951131  | 72771  | 50.288  |
|       |           | 1891382 | 163343 | 100.000 |

<Chromatogram>

mV

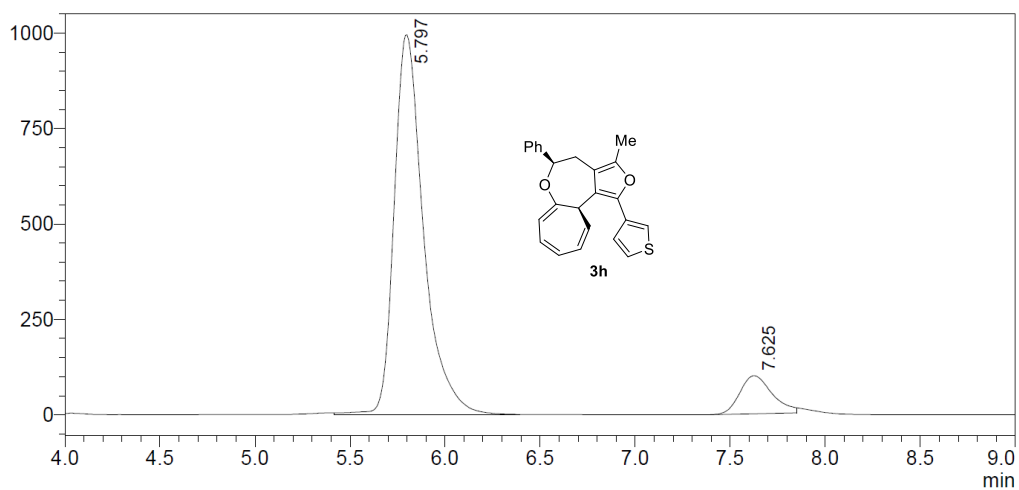

<Peak Table>

| Peak# | Ret. Time | Area     | Height  | Area%   |
|-------|-----------|----------|---------|---------|
| 1     | 5.797     | 10770211 | 995826  | 90.102  |
| 2     | 7.625     | 1183138  | 99773   | 9.898   |
|       |           | 11953349 | 1095599 | 100.000 |

<Chromatogram>

mV

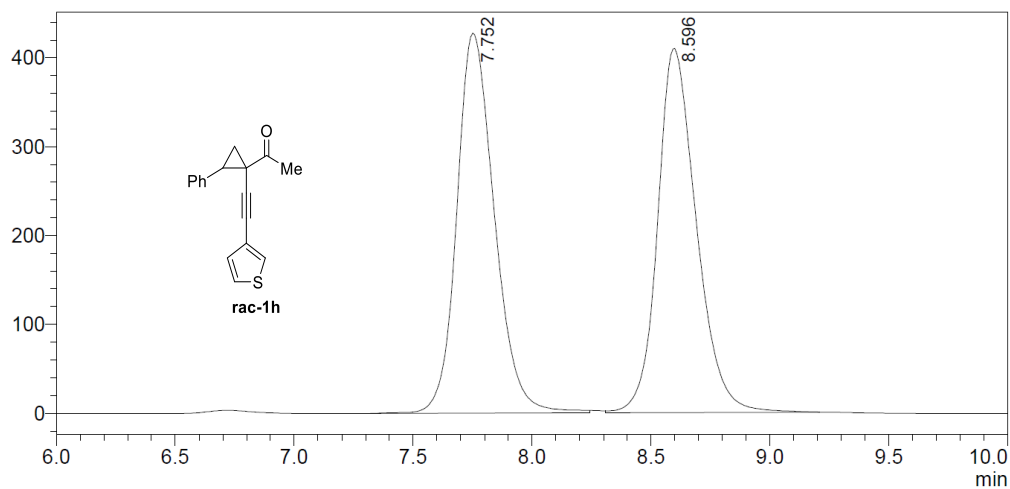

<Peak Table>

| Peak# | Ret. Time | Area    | Height | Area%   |
|-------|-----------|---------|--------|---------|
| 1     | 7.752     | 4711438 | 427883 | 50.327  |
| 2     | 8.596     | 4650123 | 409630 | 49.673  |
|       |           | 9361561 | 837513 | 100.000 |

<Chromatogram>

mV

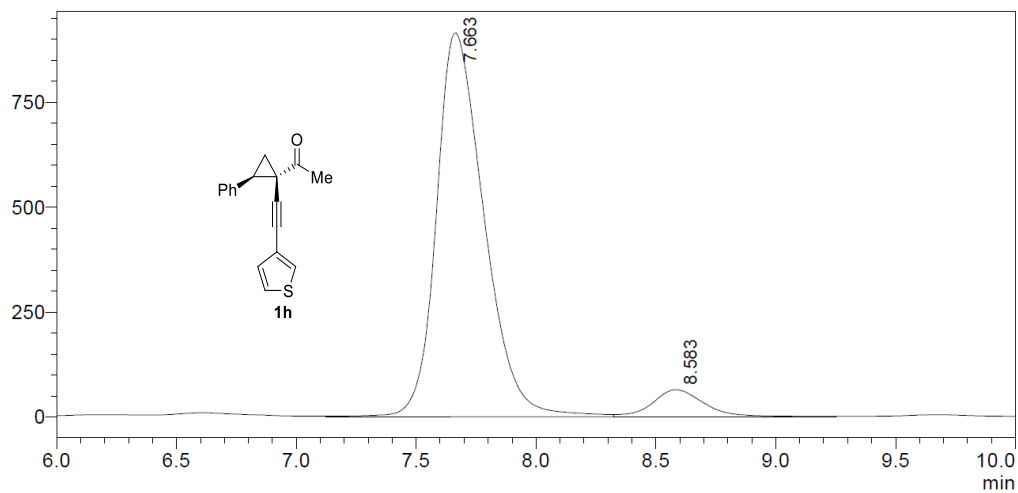

<Peak Table>

| Peak# | Ret. Time | Area     | Height | Area%   |
|-------|-----------|----------|--------|---------|
| 1     | 7.663     | 12686546 | 915010 | 92.913  |
| 2     | 8.583     | 967732   | 64546  | 7.087   |
|       |           | 13654279 | 979556 | 100.000 |

<Chromatogram>

mV

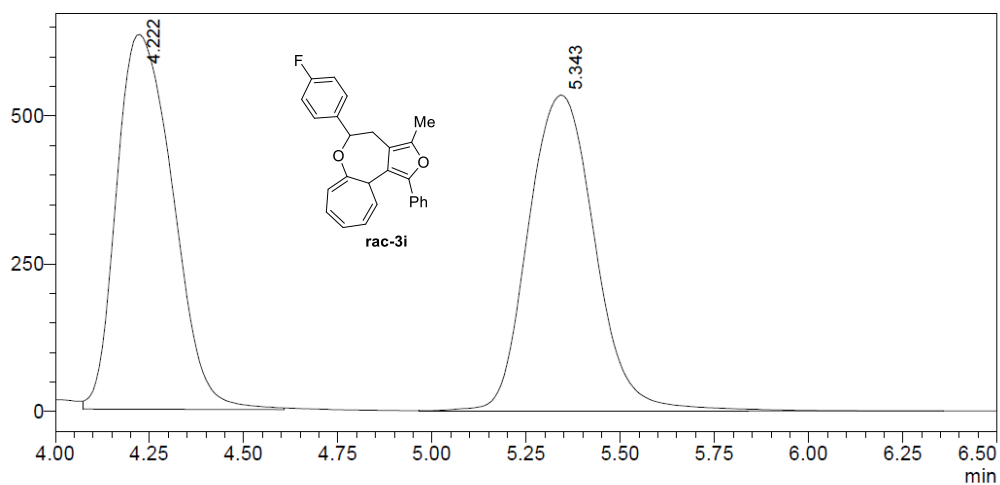

<Peak Table>

| Peak# | Ret. Time | Area     | Height  | Area%   |
|-------|-----------|----------|---------|---------|
| 1     | 4.222     | 6604158  | 634537  | 49.999  |
| 2     | 5.343     | 6604420  | 535194  | 50.001  |
|       |           | 13208579 | 1169731 | 100.000 |

<Chromatogram>

mV

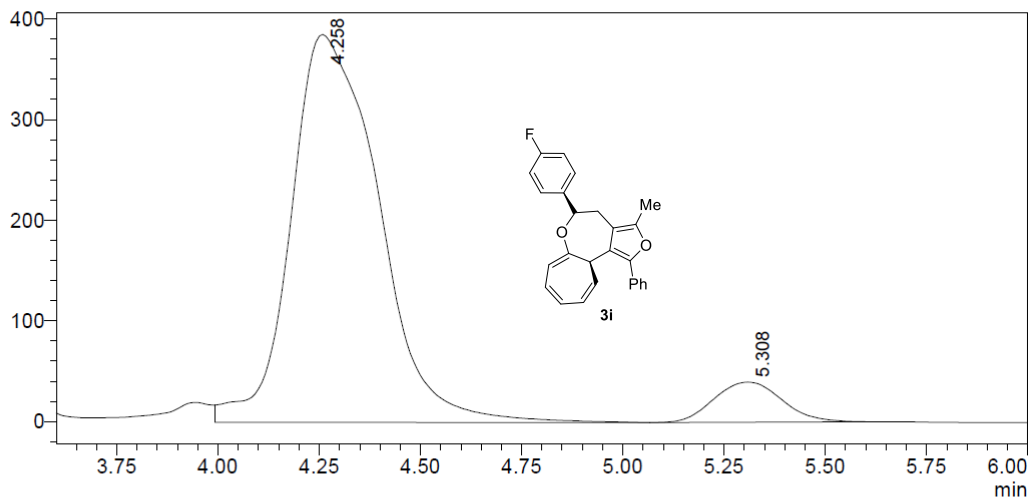

<Peak Table>

| Peak# | Ret. Time | Area    | Height | Area%   |
|-------|-----------|---------|--------|---------|
| 1     | 4.258     | 5812723 | 385518 | 92.610  |
| 2     | 5.308     | 463869  | 39870  | 7.390   |
|       |           | 6276592 | 425388 | 100.000 |

<Chromatogram>

mV

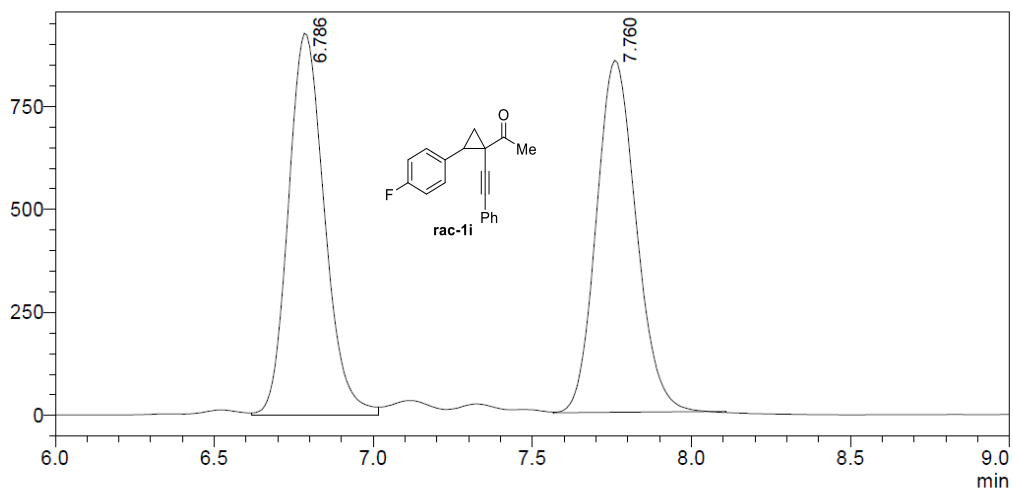

<Peak Table>

| Peak# | Ret. Time | Area     | Height  | Area%   |
|-------|-----------|----------|---------|---------|
| 1     | 6.786     | 7339786  | 928354  | 49.640  |
| 2     | 7.760     | 7446328  | 854699  | 50.360  |
|       |           | 14786115 | 1783053 | 100.000 |

<Chromatogram>

mV

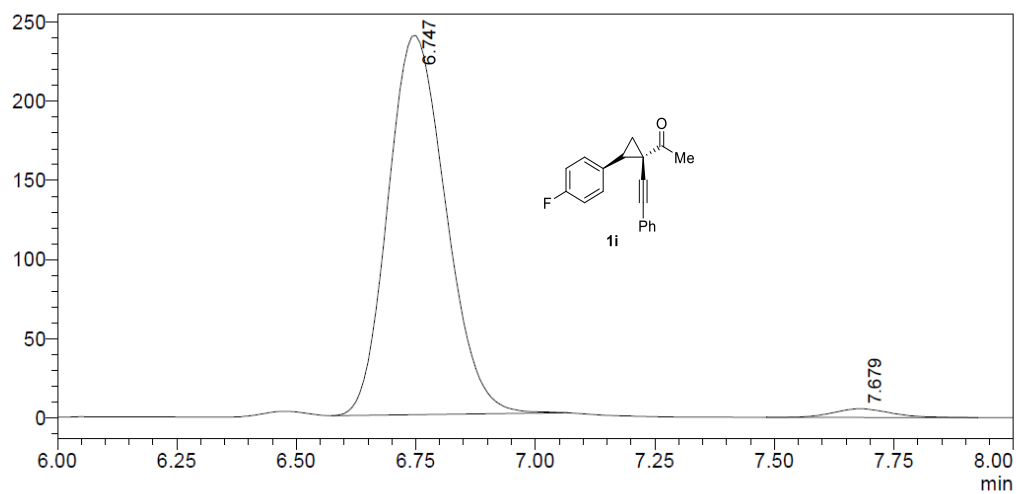

<Peak Table>

| Peak# | Ret. Time | Area    | Height | Area%   |
|-------|-----------|---------|--------|---------|
| 1     | 6.747     | 2013899 | 239459 | 97.727  |
| 2     | 7.679     | 46839   | 5511   | 2.273   |
|       |           | 2060738 | 244970 | 100.000 |

<Chromatogram>

mV

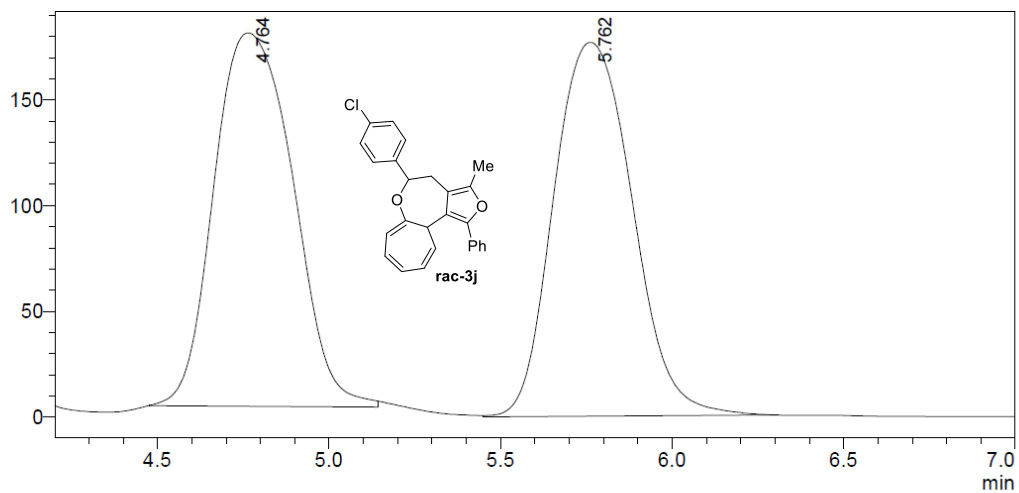

<Peak Table>

| Peak# | Ret. Time | Area    | Height | Area%   |
|-------|-----------|---------|--------|---------|
| 1     | 4.764     | 2834889 | 176663 | 50.097  |
| 2     | 5.762     | 2823901 | 176840 | 49.903  |
|       |           | 5658789 | 353503 | 100.000 |

<Chromatogram>

mV

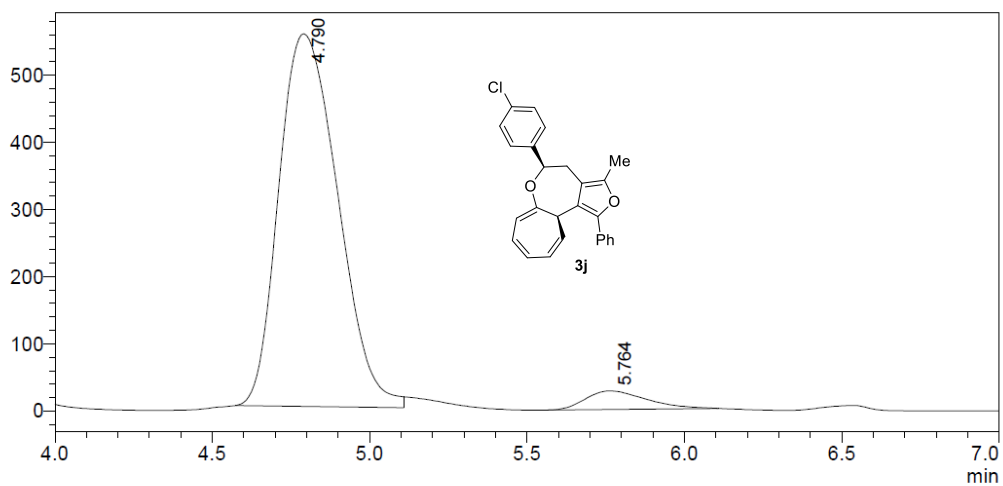

<Peak Table>

| Peak# | Ret. Time | Area    | Height | Area%   |
|-------|-----------|---------|--------|---------|
| 1     | 4.790     | 7235510 | 555141 | 95.086  |
| 2     | 5.764     | 373944  | 27840  | 4.914   |
|       |           | 7609453 | 582981 | 100.000 |

<Chromatogram>

mV

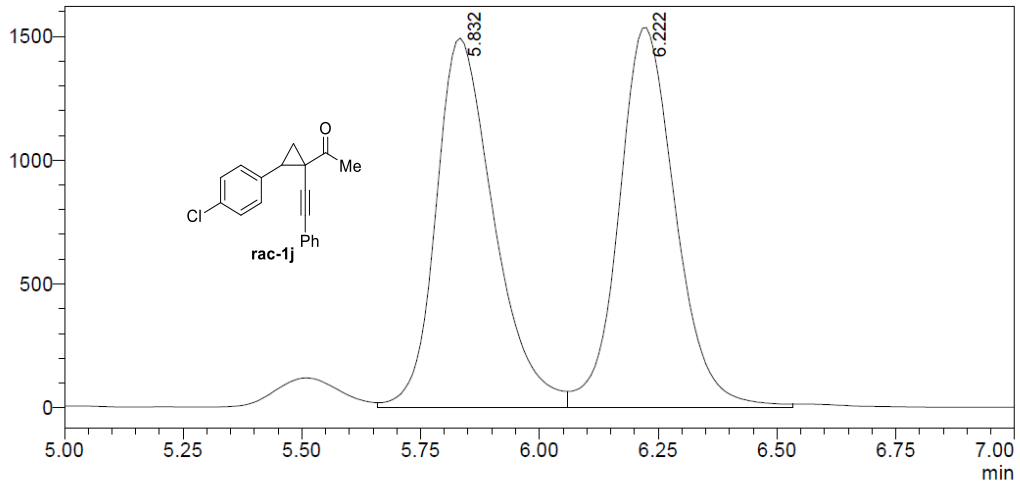

<Peak Table>

| Peak# | Ret. Time | Area     | Height  | Area%   |
|-------|-----------|----------|---------|---------|
| 1     | 5.832     | 12693766 | 1493792 | 49.904  |
| 2     | 6.222     | 12742471 | 1536071 | 50.096  |
|       |           | 25436237 | 3029862 | 100.000 |

<Chromatogram>

mV

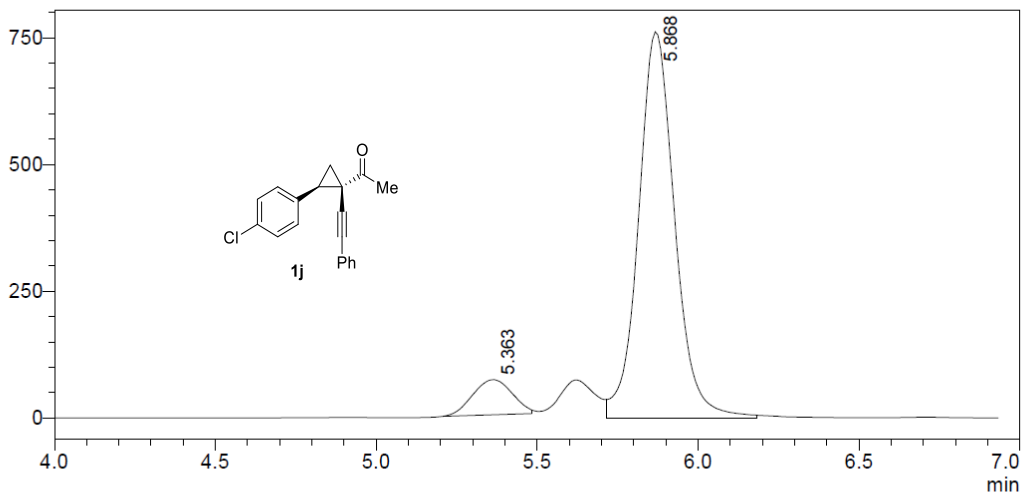

<Peak Table>

| Peak# | Ret. Time | Area    | Height | Area%   |
|-------|-----------|---------|--------|---------|
| 1     | 5.363     | 590072  | 68984  | 9.041   |
| 2     | 5.868     | 5936848 | 761867 | 90.959  |
|       |           | 6526920 | 830852 | 100.000 |



<Chromatogram>

mV

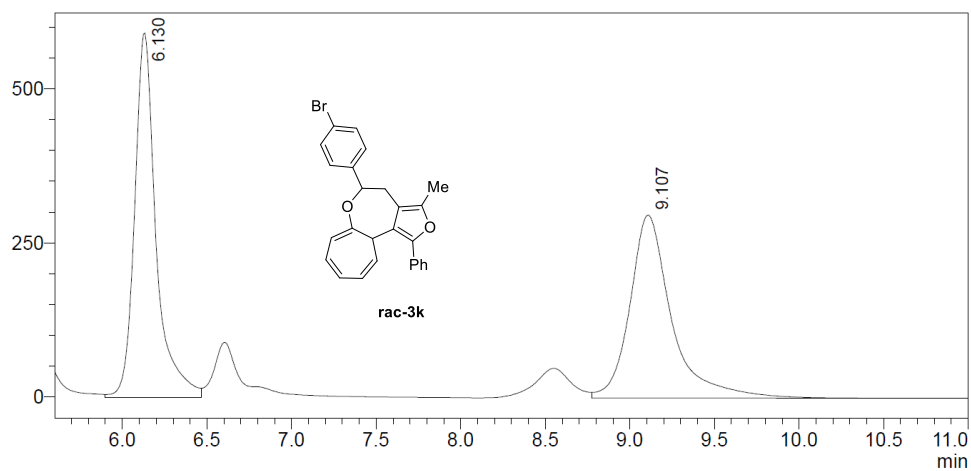

<Peak Table>

| Peak# | Ret. Time | Area     | Height | Area%   |
|-------|-----------|----------|--------|---------|
| 1     | 6.130     | 5222449  | 591998 | 50.578  |
| 2     | 9.107     | 5103118  | 297347 | 49.422  |
|       |           | 10325567 | 889345 | 100.000 |

<Chromatogram>

mV

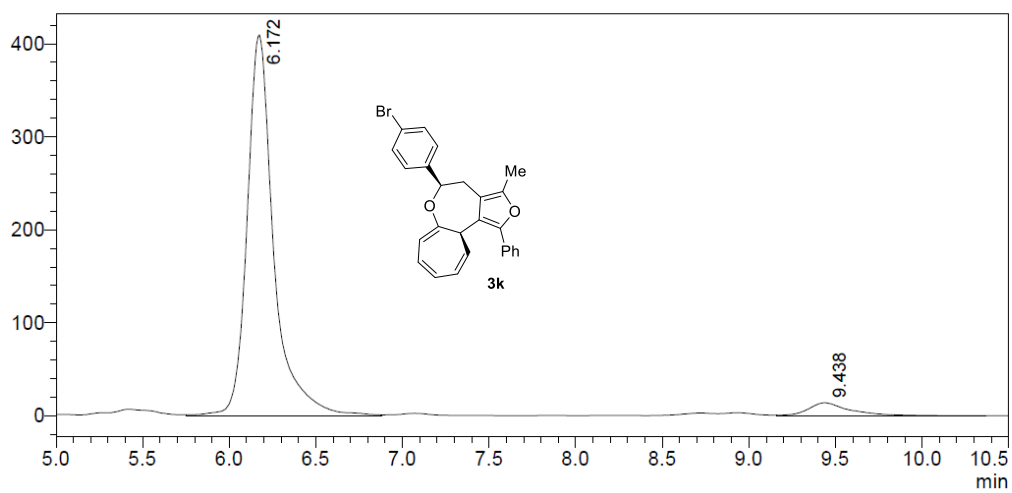

<Peak Table>

| Peak# | Ret. Time | Area    | Height | Area%   |
|-------|-----------|---------|--------|---------|
| 1     | 6.172     | 4394521 | 409611 | 94.899  |
| 2     | 9.438     | 236236  | 13911  | 5.101   |
|       |           | 4630757 | 423521 | 100.000 |

<Chromatogram>

mV

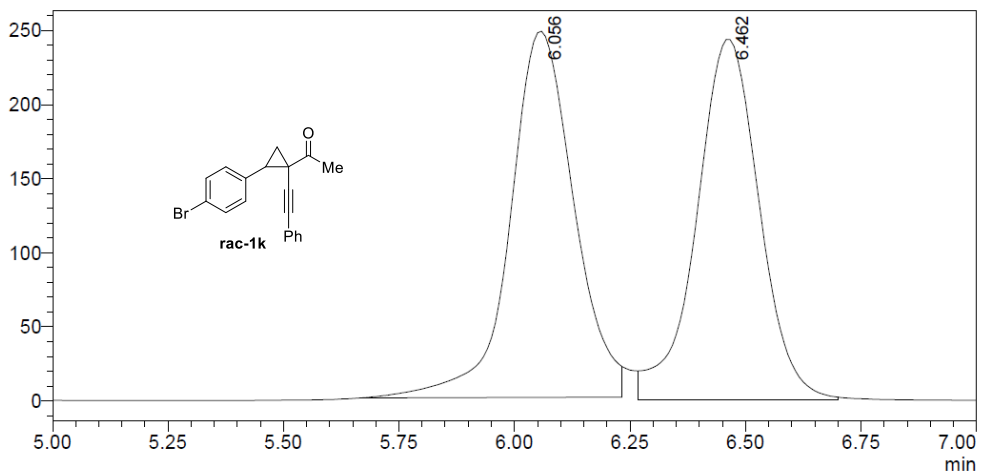

<Peak Table>

| Peak# | Ret. Time | Area    | Height | Area%   |
|-------|-----------|---------|--------|---------|
| 1     | 6.056     | 2377005 | 247125 | 50.954  |
| 2     | 6.462     | 2288027 | 243098 | 49.046  |
|       |           | 4665032 | 490223 | 100.000 |

<Chromatogram>

mV

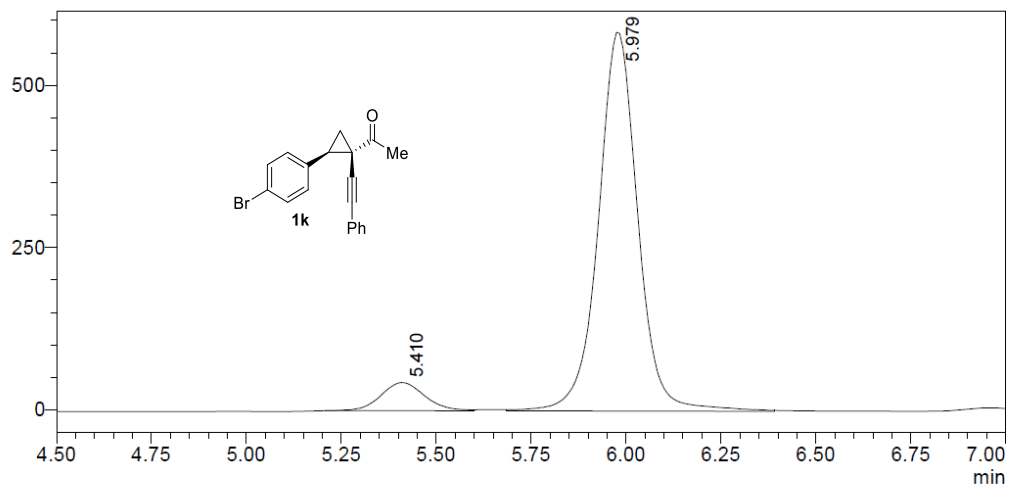

<Peak Table>

| Peak# | Ret. Time | Area    | Height | Area%   |
|-------|-----------|---------|--------|---------|
| 1     | 5.410     | 349237  | 43536  | 7.616   |
| 2     | 5.979     | 4236167 | 584267 | 92.384  |
|       |           | 4585403 | 627803 | 100.000 |

<Chromatogram>

mV

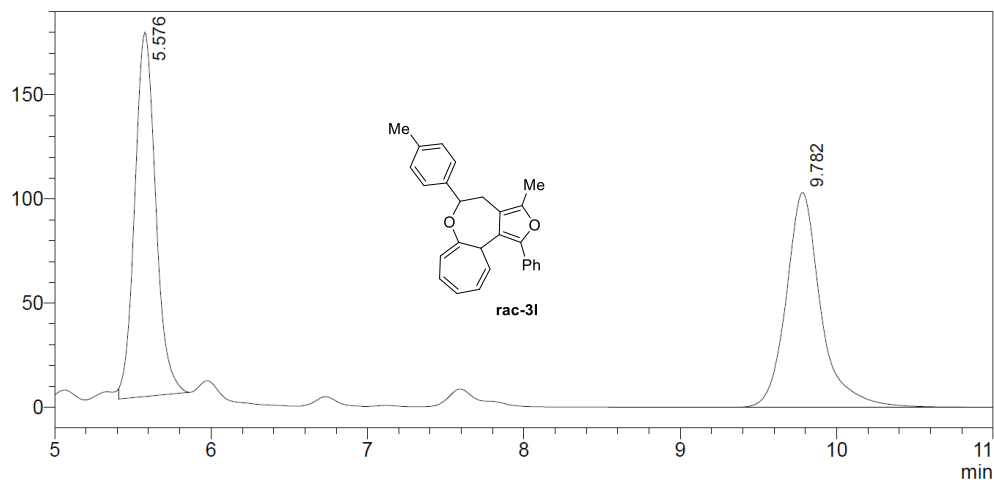

<Peak Table>

| Peak# | Ret. Time | Area    | Height | Area%   |
|-------|-----------|---------|--------|---------|
| 1     | 5.576     | 1627541 | 174855 | 50.625  |
| 2     | 9.782     | 1587344 | 103150 | 49.375  |
|       |           | 3214885 | 278005 | 100.000 |

<Chromatogram>

mV

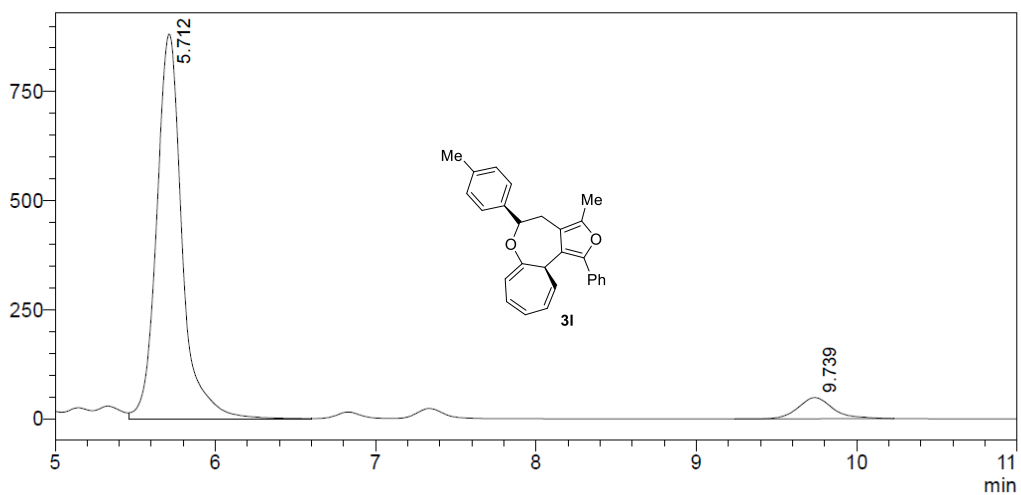

<Peak Table>

| Peak# | Ret. Time | Area     | Height | Area%   |
|-------|-----------|----------|--------|---------|
| 1     | 5.712     | 9719295  | 881759 | 93.003  |
| 2     | 9.739     | 731235   | 48360  | 6.997   |
|       |           | 10450530 | 930119 | 100.000 |

<Chromatogram>

mV

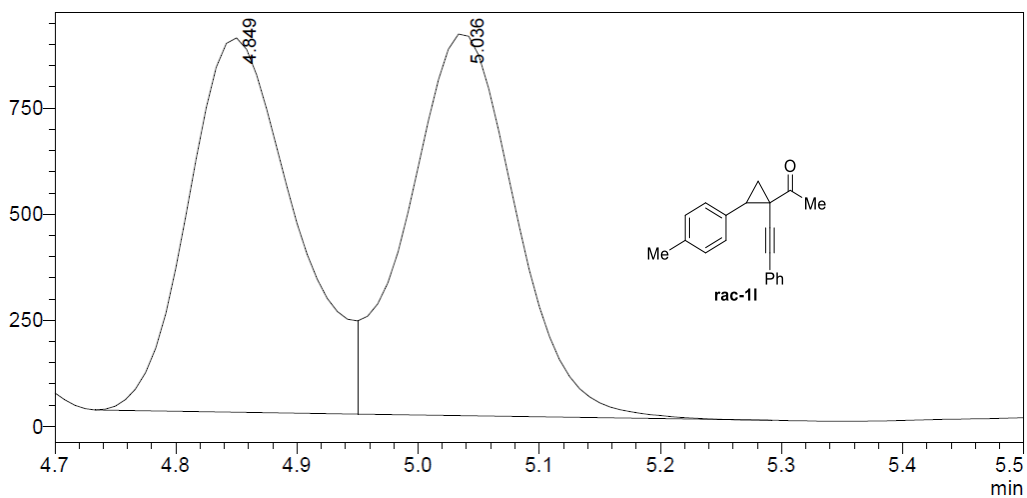

<Peak Table>

| Peak# | Ret. Time | Area     | Height  | Area%   |
|-------|-----------|----------|---------|---------|
| 1     | 4.849     | 5420871  | 881836  | 49.739  |
| 2     | 5.036     | 5477770  | 899067  | 50.261  |
|       |           | 10898641 | 1780903 | 100.000 |

<Chromatogram>

mV

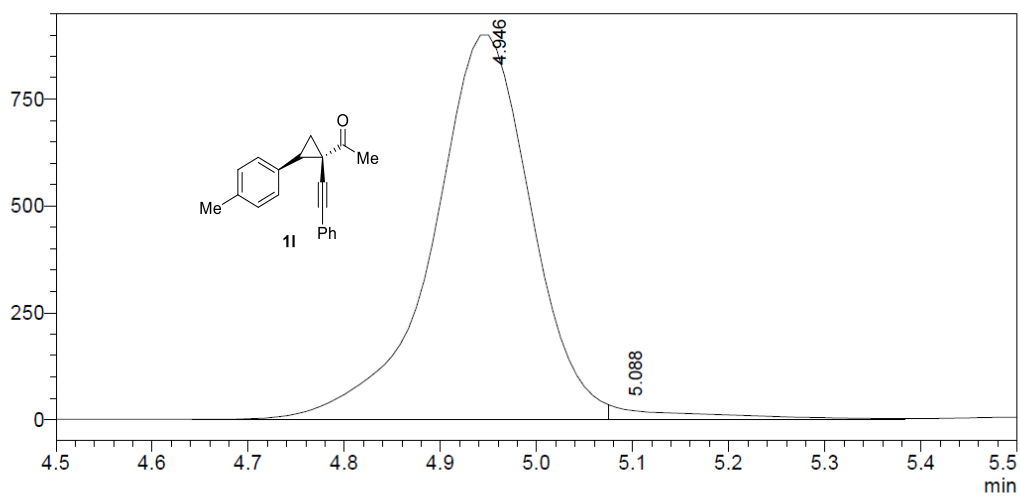

<Peak Table>

| Peak# | Ret. Time | Area    | Height | Area%   |
|-------|-----------|---------|--------|---------|
| 1     | 4.946     | 6423672 | 900512 | 97.134  |
| 2     | 5.088     | 189539  | 28458  | 2.866   |
|       |           | 6613211 | 928970 | 100.000 |

<Chromatogram>

mV

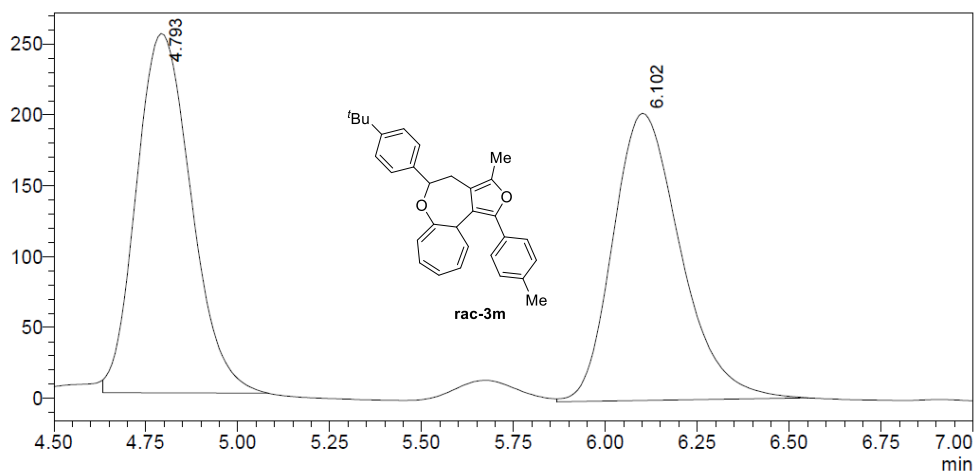

<Peak Table>

| Peak# | Ret. Time | Area    | Height | Area%   |
|-------|-----------|---------|--------|---------|
| 1     | 4.793     | 2625812 | 253498 | 50.293  |
| 2     | 6.102     | 2595209 | 202471 | 49.707  |
|       |           | 5221021 | 455969 | 100.000 |

<Chromatogram>

mV

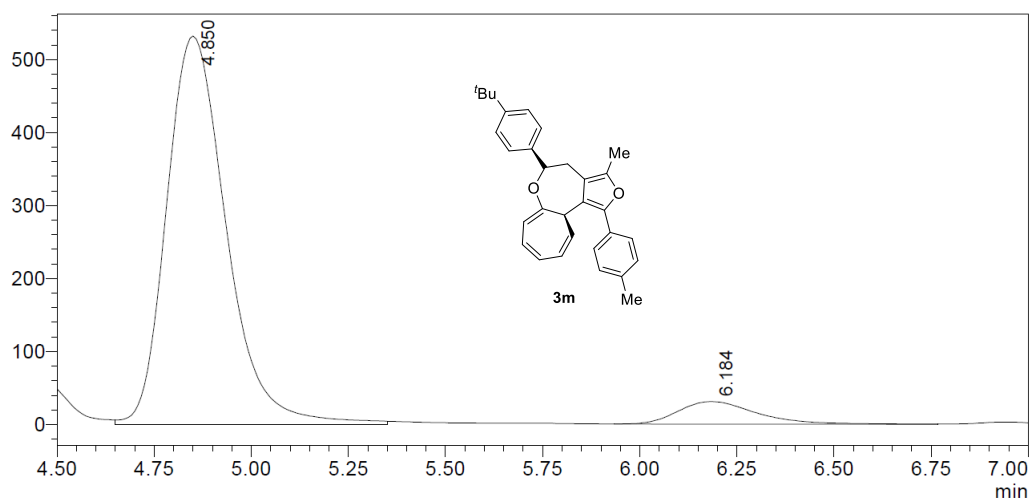

<Peak Table>

| Peak# | Ret. Time | Area    | Height | Area%   |
|-------|-----------|---------|--------|---------|
| 1     | 4.850     | 5691035 | 532515 | 92.935  |
| 2     | 6.184     | 432628  | 30813  | 7.065   |
|       |           | 6123663 | 563328 | 100.000 |

<Chromatogram>

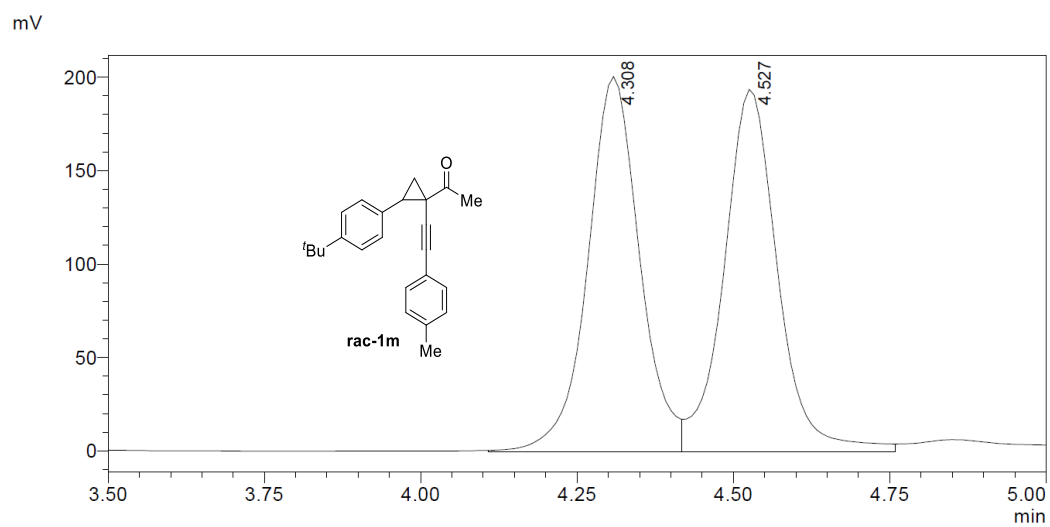

<Peak Table>

| Peak# | Ret. Time | Area    | Height | Area%   |
|-------|-----------|---------|--------|---------|
| 1     | 4.308     | 1157018 | 200762 | 50.063  |
| 2     | 4.527     | 1154117 | 193893 | 49.937  |
|       |           | 2311136 | 394655 | 100.000 |

<Chromatogram>

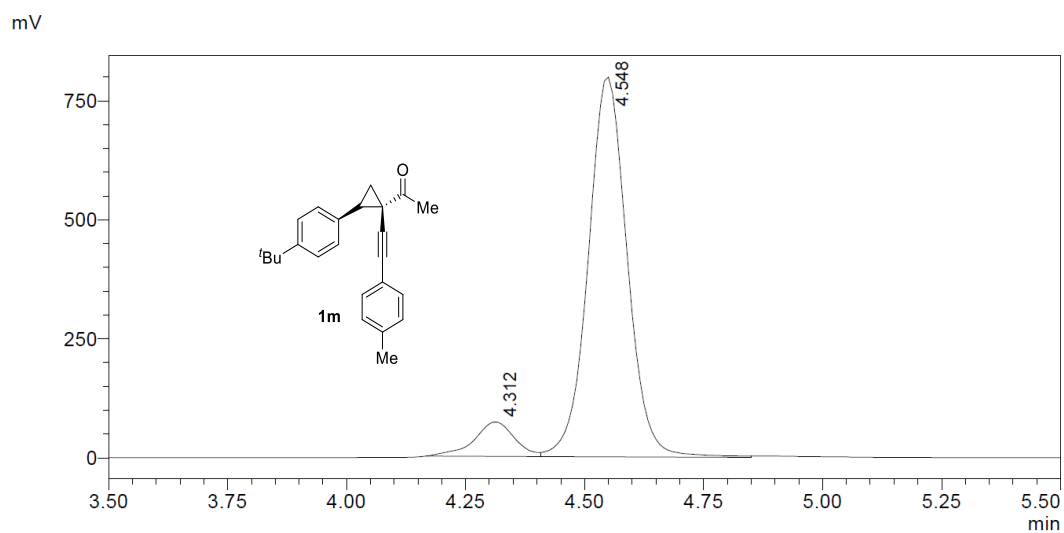

<Peak Table>

| Peak# | Ret. Time | Area    | Height | Area%   |
|-------|-----------|---------|--------|---------|
| 1     | 4.312     | 430394  | 72460  | 8.656   |
| 2     | 4.548     | 4542019 | 797877 | 91.344  |
|       |           | 4972413 | 870337 | 100.000 |

<Chromatogram>

mV

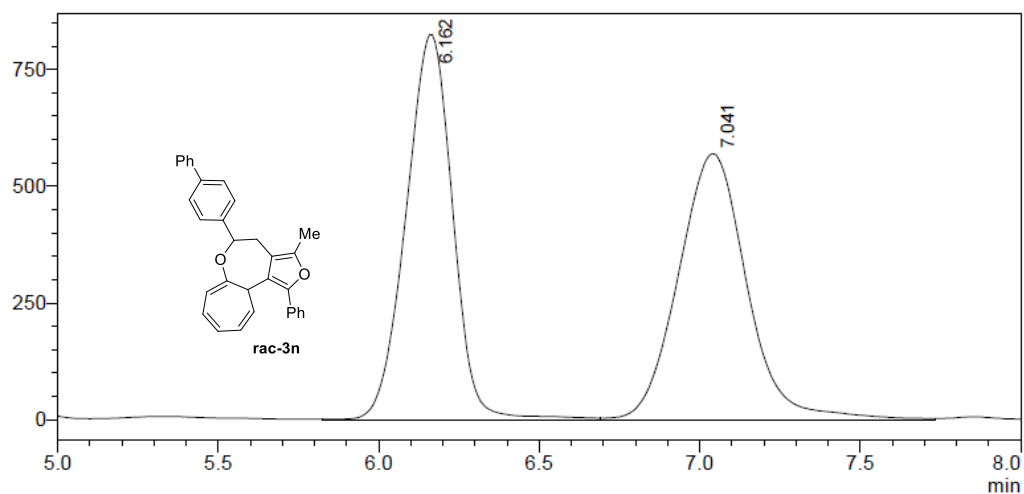

<Peak Table>

| Peak# | Ret. Time | Area     | Height  | Area%   |
|-------|-----------|----------|---------|---------|
| 1     | 6.162     | 8348663  | 825214  | 49.706  |
| 2     | 7.041     | 8447427  | 570113  | 50.294  |
|       |           | 16796090 | 1395327 | 100.000 |

<Chromatogram>

mV

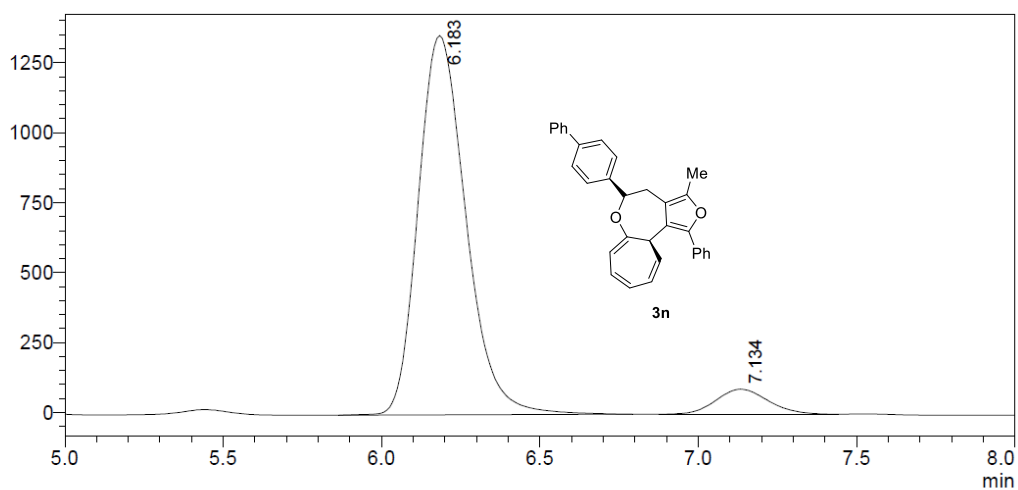

<Peak Table>

| Peak# | Ret. Time | Area     | Height  | Area%   |
|-------|-----------|----------|---------|---------|
| 1     | 6.183     | 14204117 | 1355775 | 93.293  |
| 2     | 7.134     | 1021176  | 89279   | 6.707   |
|       |           | 15225293 | 1445054 | 100.000 |

<Chromatogram>

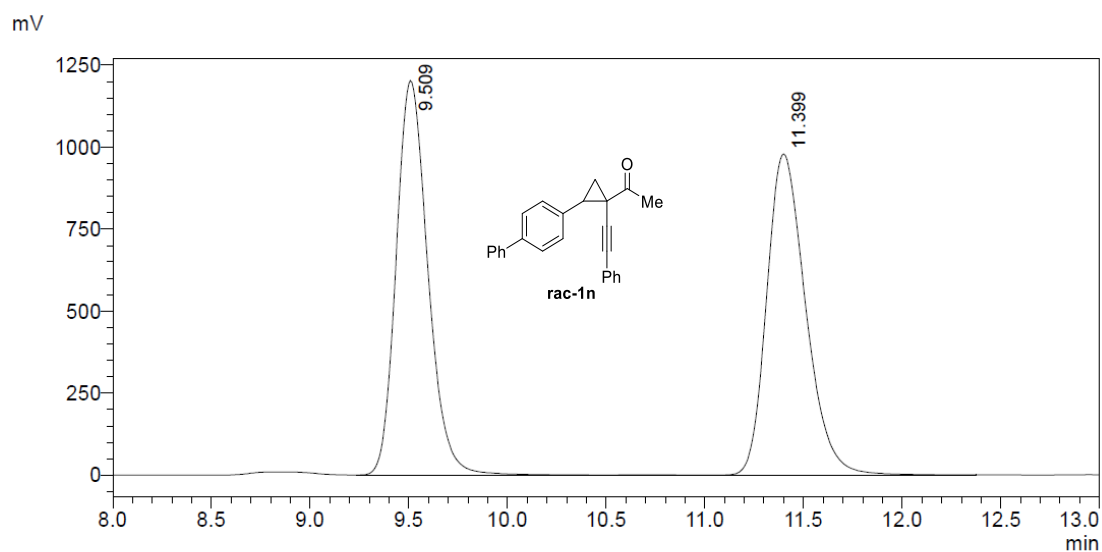

<Peak Table>

| Peak# | Ret. Time | Area     | Height  | Area%   |
|-------|-----------|----------|---------|---------|
| 1     | 9.509     | 13504856 | 1203285 | 50.019  |
| 2     | 11.399    | 13494413 | 979477  | 49.981  |
|       |           | 26999268 | 2182762 | 100.000 |

<Chromatogram>

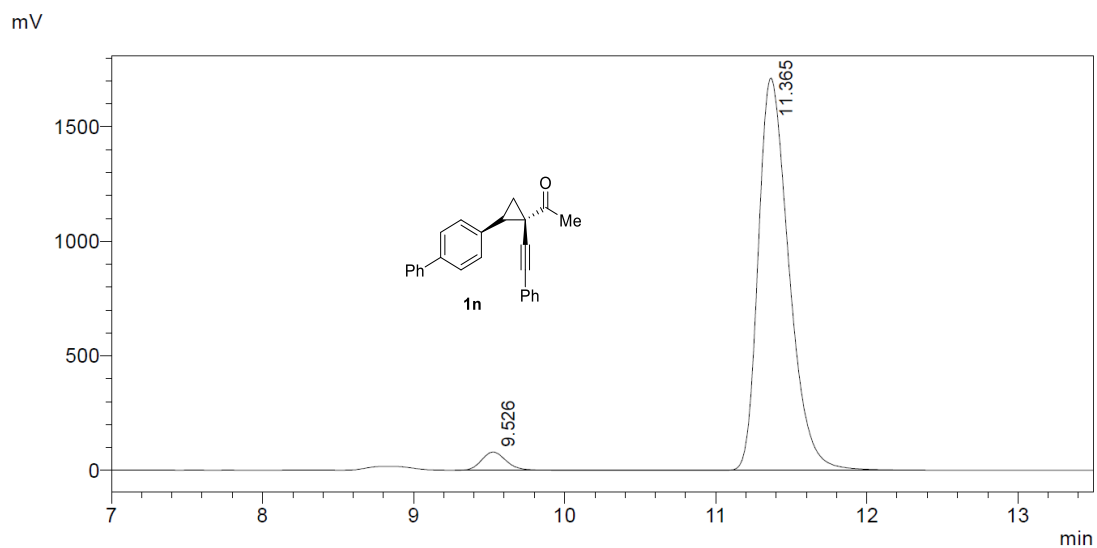

<Peak Table>

| Peak# | Ret. Time | Area     | Height  | Area%   |
|-------|-----------|----------|---------|---------|
| 1     | 9.526     | 944724   | 80480   | 3.761   |
| 2     | 11.365    | 24174805 | 1713613 | 96.239  |
|       |           | 25119528 | 1794092 | 100.000 |



<Chromatogram>

mV

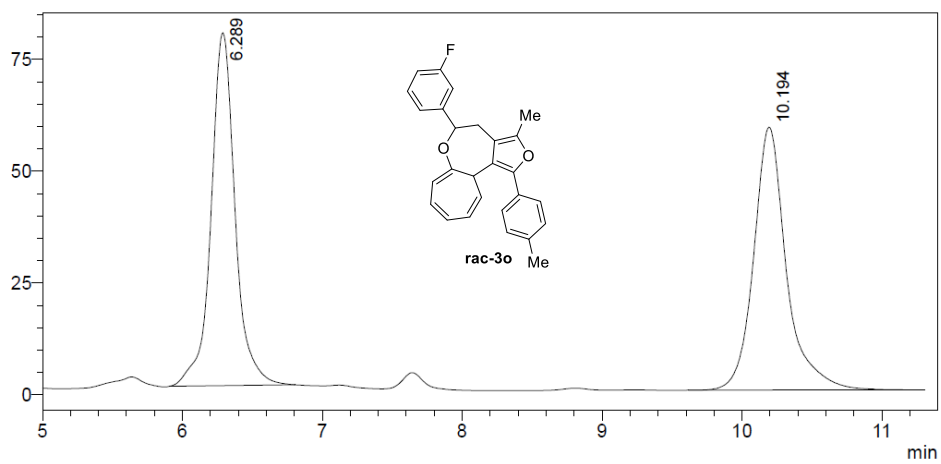

<Peak Table>

| Peak# | Ret. Time | Area    | Height | Area%   |
|-------|-----------|---------|--------|---------|
| 1     | 6.289     | 943581  | 78973  | 49.645  |
| 2     | 10.194    | 957075  | 58859  | 50.355  |
|       |           | 1900656 | 137832 | 100.000 |

<Chromatogram>

mV

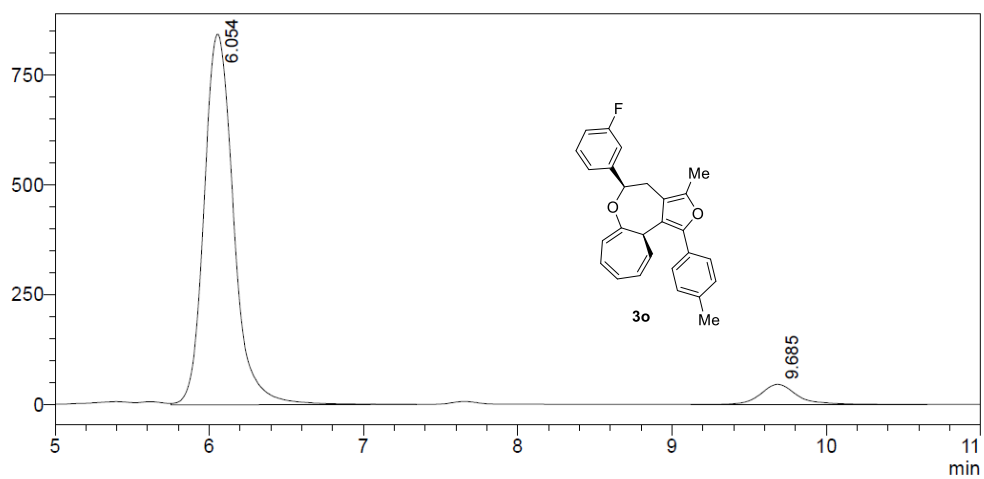

<Peak Table>

| Peak# | Ret. Time | Area     | Height | Area%   |
|-------|-----------|----------|--------|---------|
| 1     | 6.054     | 11229945 | 843006 | 93.725  |
| 2     | 9.685     | 751857   | 45602  | 6.275   |
|       |           | 11981802 | 888609 | 100.000 |

<Chromatogram>

mV

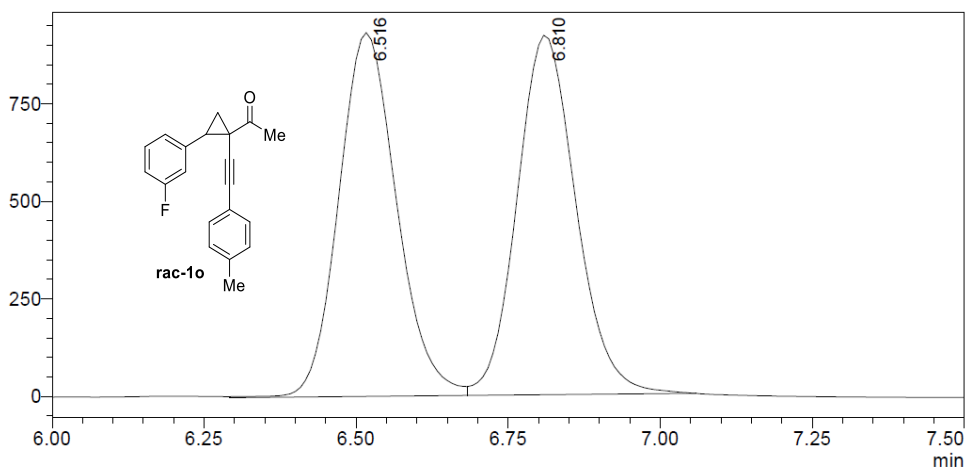

<Peak Table>

| Peak# | Ret. Time | Area     | Height  | Area%   |
|-------|-----------|----------|---------|---------|
| 1     | 6.516     | 6170708  | 932143  | 49.858  |
| 2     | 6.810     | 6205933  | 921084  | 50.142  |
|       |           | 12376641 | 1853227 | 100.000 |

<Chromatogram>

mV

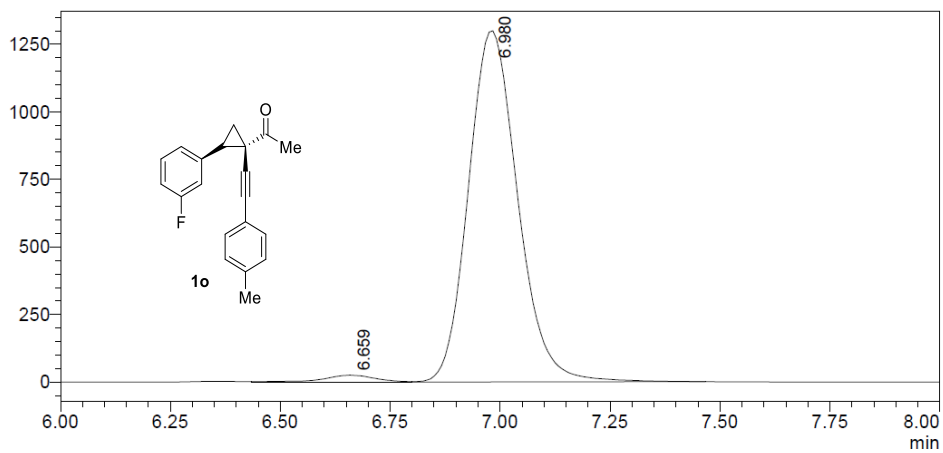

<Peak Table>

| Peak# | Ret. Time | Area     | Height  | Area%   |
|-------|-----------|----------|---------|---------|
| 1     | 6.659     | 213524   | 25499   | 2.064   |
| 2     | 6.980     | 10130513 | 1299106 | 97.936  |
|       |           | 10344037 | 1324605 | 100.000 |

<Chromatogram>

mV

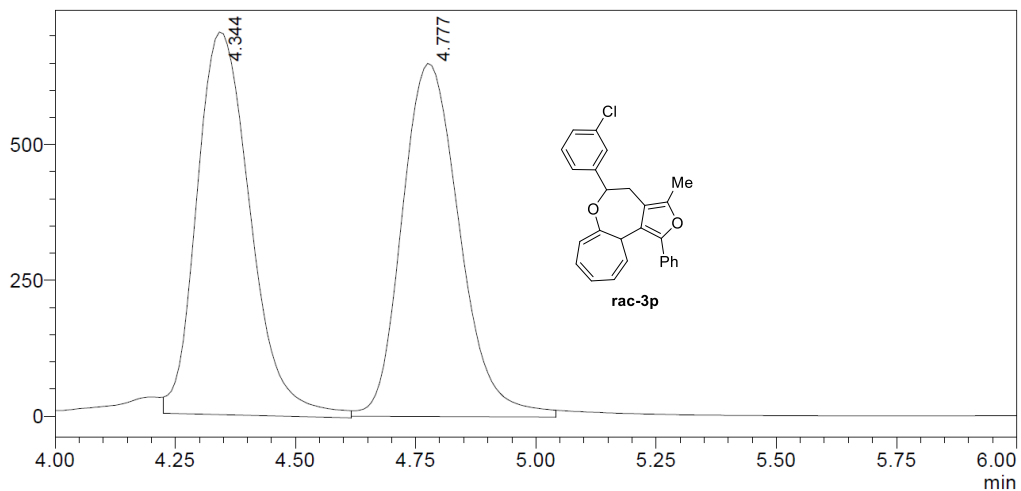

<Peak Table>

| Peak# | Ret. Time | Area     | Height  | Area%   |
|-------|-----------|----------|---------|---------|
| 1     | 4.344     | 5462244  | 704538  | 50.172  |
| 2     | 4.777     | 5424818  | 650437  | 49.828  |
|       |           | 10887062 | 1354975 | 100.000 |

<Chromatogram>

mV

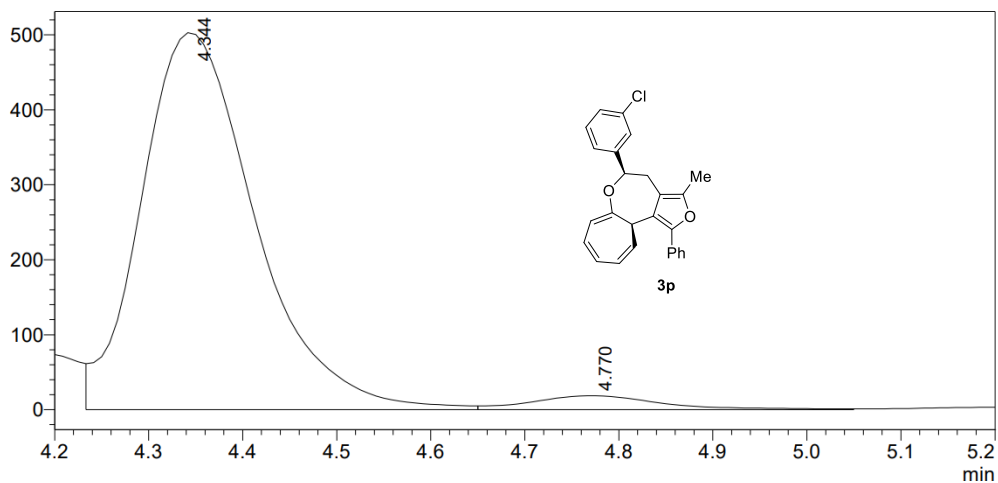

<Peak Table>

| Peak# | Ret. Time | Area    | Height | Area%   |
|-------|-----------|---------|--------|---------|
| 1     | 4.344     | 4213601 | 502968 | 95.938  |
| 2     | 4.770     | 178410  | 18390  | 4.062   |
|       |           | 4392010 | 521358 | 100.000 |

<Chromatogram>

mV

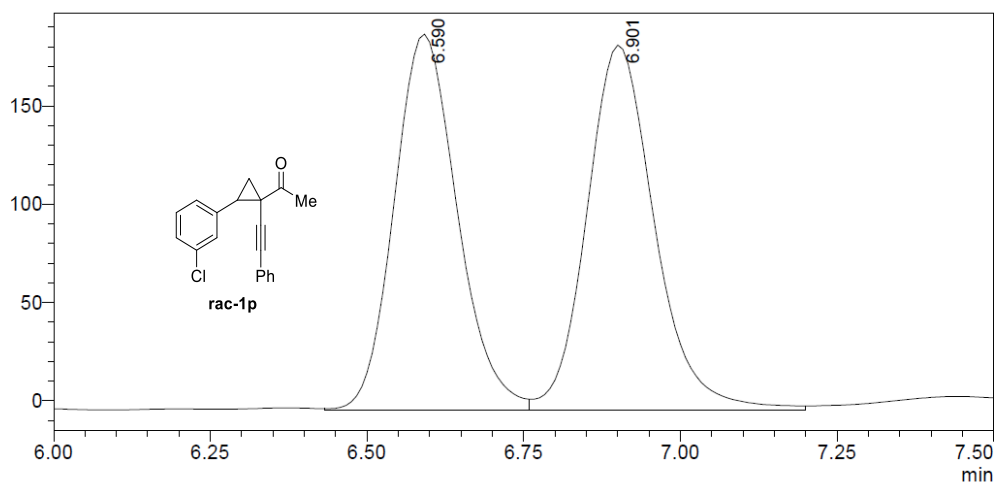

<Peak Table>

| Peak# | Ret. Time | Area    | Height | Area%   |
|-------|-----------|---------|--------|---------|
| 1     | 6.590     | 1341707 | 191408 | 48.924  |
| 2     | 6.901     | 1400738 | 185771 | 51.076  |
|       |           | 2742445 | 377179 | 100.000 |

<Chromatogram>

mV

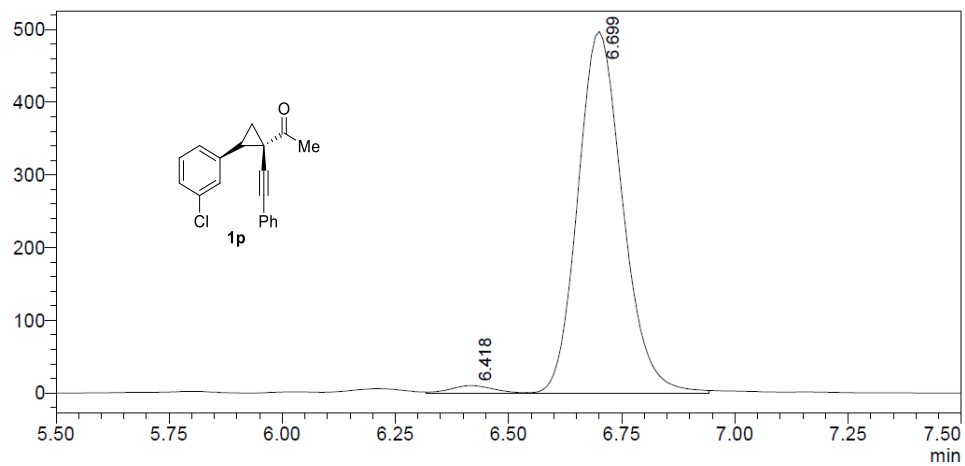

<Peak Table>

| Peak# | Ret. Time | Area    | Height | Area%   |
|-------|-----------|---------|--------|---------|
| 1     | 6.418     | 74833   | 10925  | 2.131   |
| 2     | 6.699     | 3436253 | 498232 | 97.869  |
|       |           | 3511086 | 509157 | 100.000 |

<Chromatogram>

mV

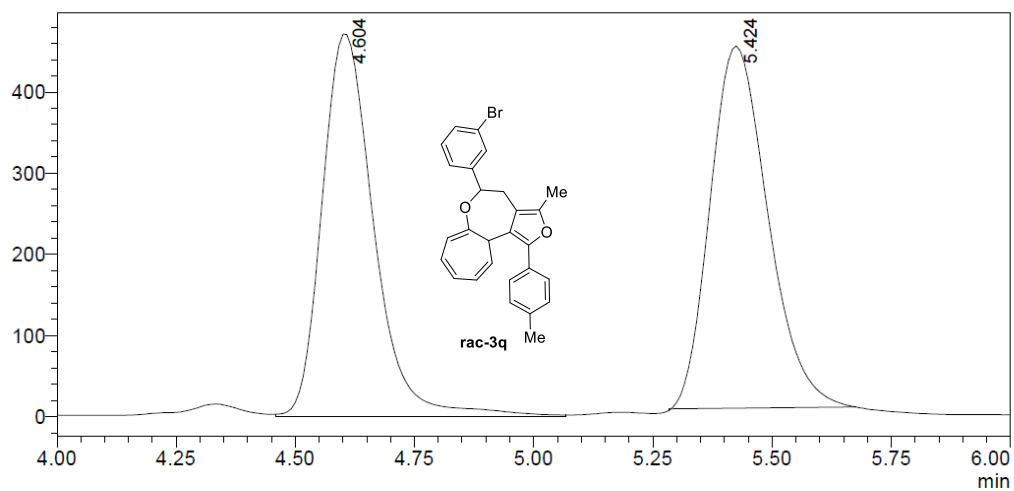

<Peak Table>

| Peak# | Ret. Time | Area    | Height | Area%   |
|-------|-----------|---------|--------|---------|
| 1     | 4.604     | 3581824 | 471526 | 48.748  |
| 2     | 5.424     | 3765852 | 446169 | 51.252  |
|       |           | 7347676 | 917695 | 100.000 |

<Chromatogram>

mV

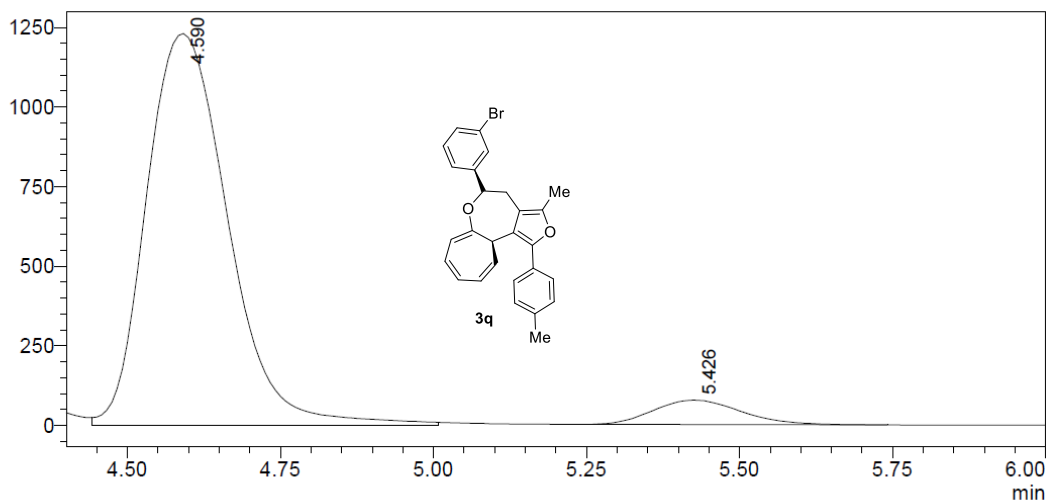

<Peak Table>

| Peak# | Ret. Time | Area     | Height  | Area%   |
|-------|-----------|----------|---------|---------|
| 1     | 4.590     | 11406748 | 1230981 | 93.712  |
| 2     | 5.426     | 765425   | 76673   | 6.288   |
|       |           | 12172173 | 1307654 | 100.000 |

<Chromatogram>

mV

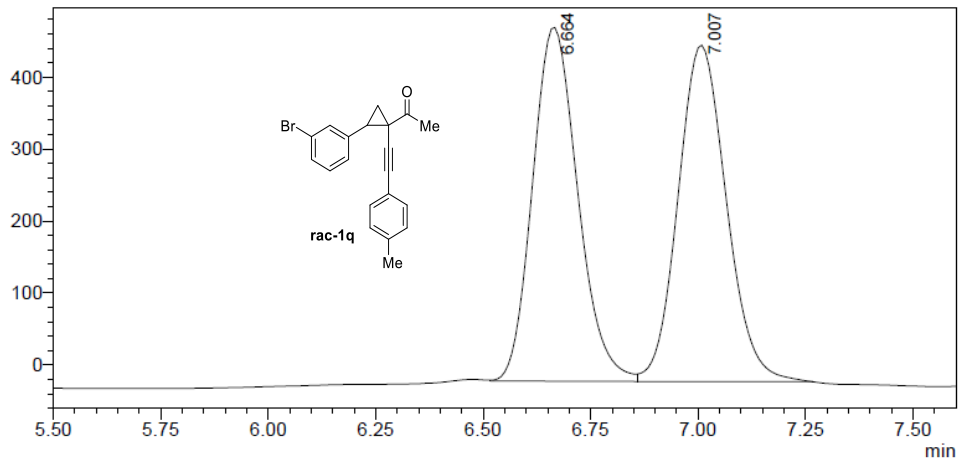

<Peak Table>

| Peak# | Ret. Time | Area    | Height | Area%   |
|-------|-----------|---------|--------|---------|
| 1     | 6.664     | 3601196 | 491617 | 49.621  |
| 2     | 7.007     | 3656201 | 467472 | 50.379  |
|       |           | 7257397 | 959089 | 100.000 |

<Chromatogram>

mV

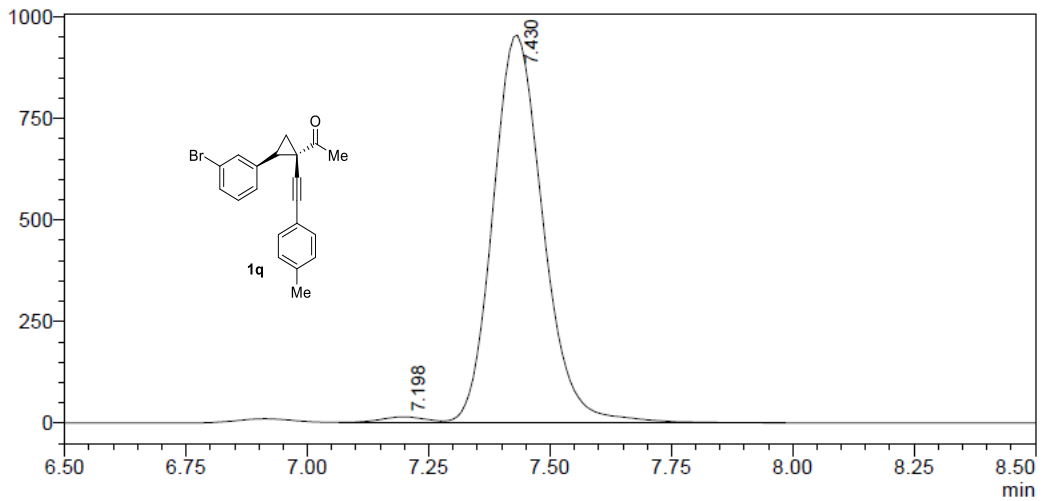

<Peak Table>

| Peak# | Ret. Time | Area    | Height | Area%   |
|-------|-----------|---------|--------|---------|
| 1     | 7.198     | 109280  | 15681  | 1.558   |
| 2     | 7.430     | 6903614 | 954829 | 98.442  |
|       |           | 7012894 | 970510 | 100.000 |

<Chromatogram>

mV

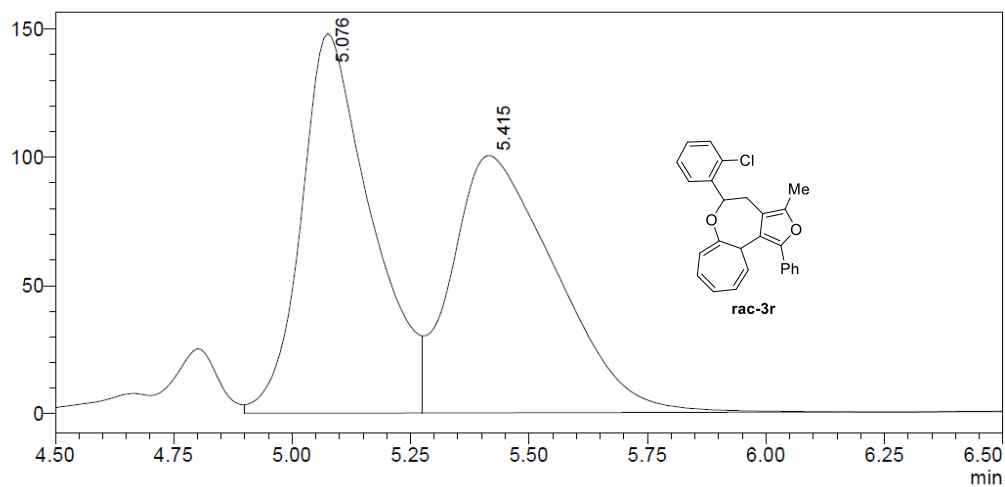

<Peak Table>

| Peak# | Ret. Time | Area    | Height | Area%   |
|-------|-----------|---------|--------|---------|
| 1     | 5.076     | 1524409 | 148029 | 49.967  |
| 2     | 5.415     | 1526438 | 100292 | 50.033  |
|       |           | 3050848 | 248322 | 100.000 |

<Chromatogram>

mV

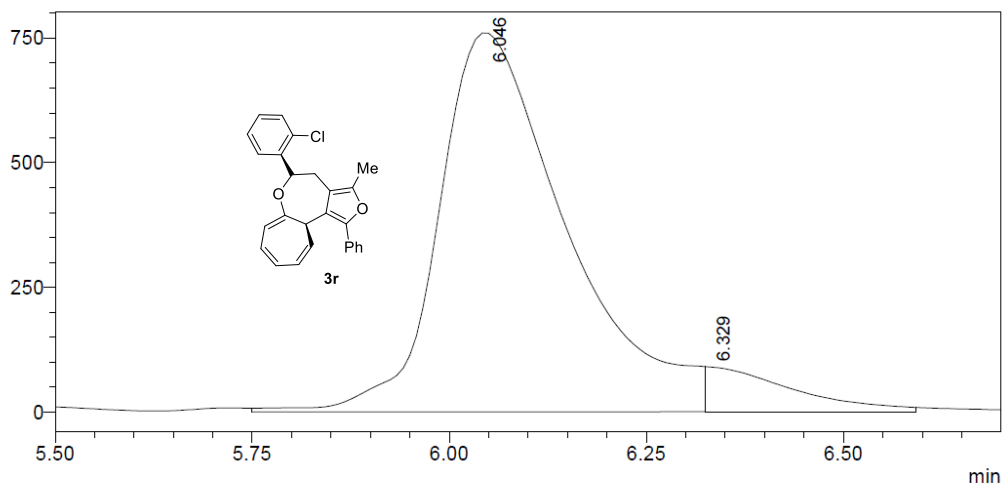

<Peak Table>

| Peak# | Ret. Time | Area    | Height | Area%   |
|-------|-----------|---------|--------|---------|
| 1     | 6.046     | 8549291 | 760004 | 92.821  |
| 2     | 6.329     | 661250  | 90789  | 7.179   |
|       |           | 9210541 | 850793 | 100.000 |

<Chromatogram>

mV

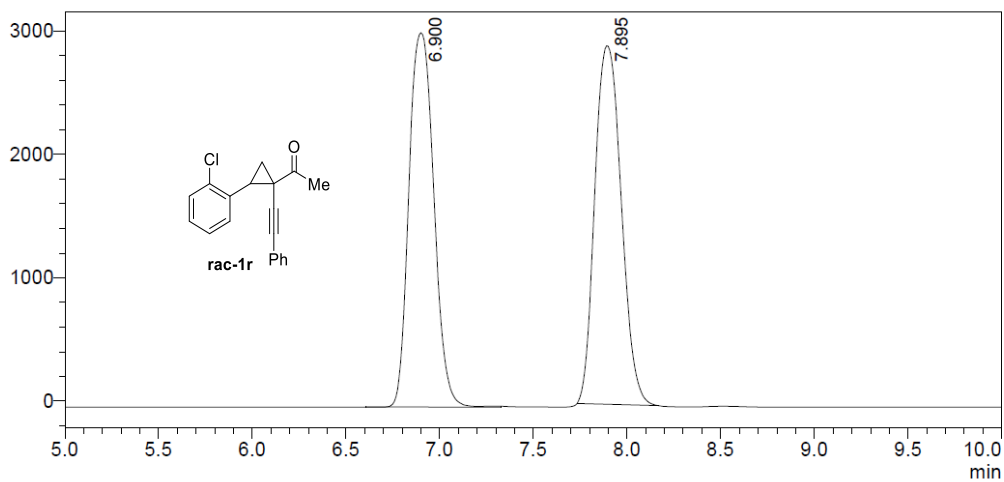

<Peak Table>

| Peak# | Ret. Time | Area     | Height  | Area%   |
|-------|-----------|----------|---------|---------|
| 1     | 6.900     | 28029676 | 3033169 | 49.570  |
| 2     | 7.895     | 28516250 | 2904272 | 50.430  |
|       |           | 56545926 | 5937441 | 100.000 |

<Chromatogram>

mV

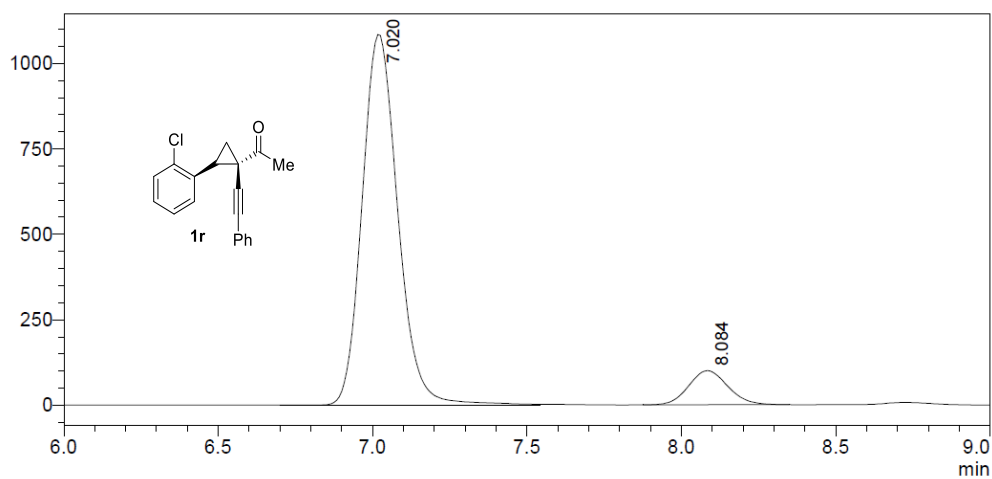

<Peak Table>

| Peak# | Ret. Time | Area    | Height  | Area%   |
|-------|-----------|---------|---------|---------|
| 1     | 7.020     | 8738854 | 1085294 | 90.821  |
| 2     | 8.084     | 883197  | 99954   | 9.179   |
|       |           | 9622050 | 1185248 | 100.000 |



<Chromatogram>

mV

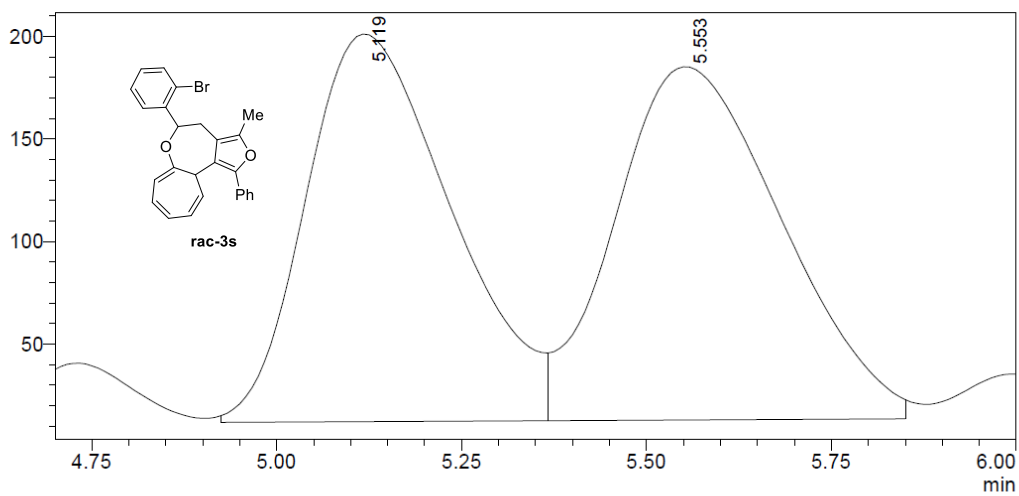

<Peak Table>

| Peak# | Ret. Time | Area    | Height | Area%   |
|-------|-----------|---------|--------|---------|
| 1     | 5.119     | 2583589 | 189045 | 48.955  |
| 2     | 5.553     | 2693860 | 172260 | 51.045  |
|       |           | 5277450 | 361305 | 100.000 |

<Chromatogram>

mV

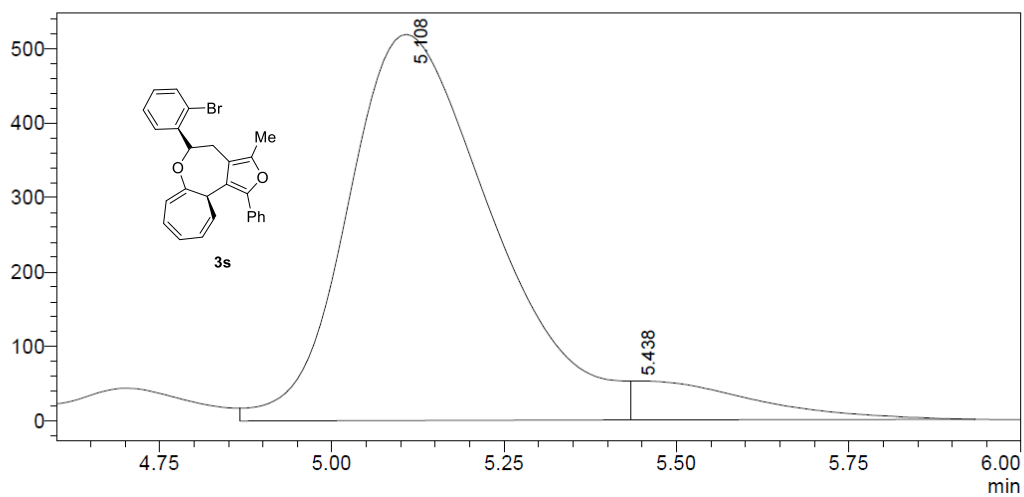

<Peak Table>

| Peak# | Ret. Time | Area    | Height | Area%   |
|-------|-----------|---------|--------|---------|
| 1     | 5.108     | 7586907 | 518294 | 92.412  |
| 2     | 5.438     | 622991  | 52252  | 7.588   |
|       |           | 8209898 | 570546 | 100.000 |

<Chromatogram>

mV

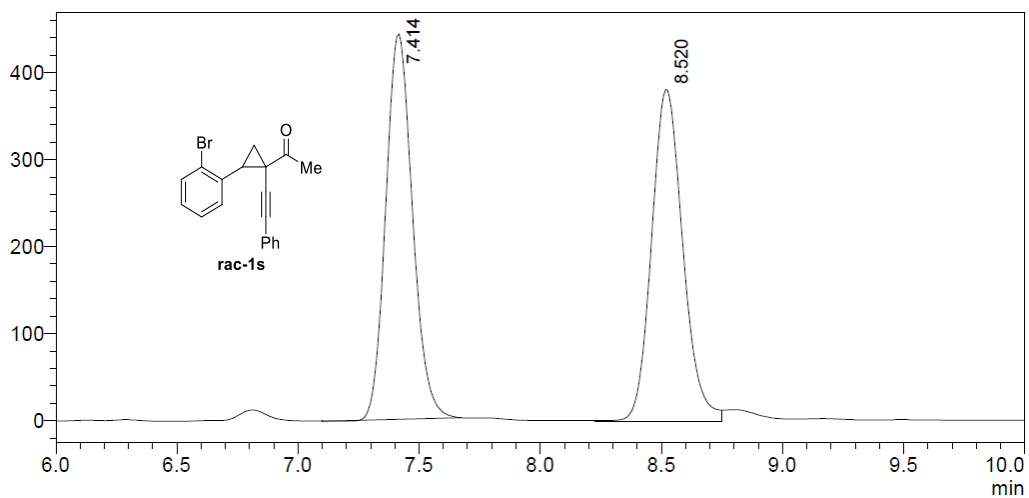

<Peak Table>

| Peak# | Ret. Time | Area    | Height | Area%   |
|-------|-----------|---------|--------|---------|
| 1     | 7.414     | 3411384 | 443151 | 49.869  |
| 2     | 8.520     | 3429274 | 381422 | 50.131  |
|       |           | 6840657 | 824573 | 100.000 |

<Chromatogram>

mV

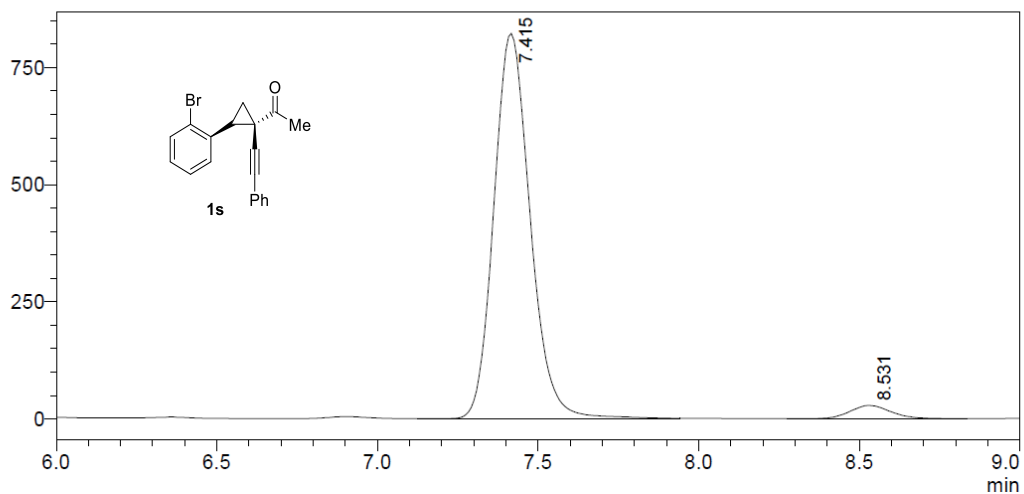

<Peak Table>

| Peak# | Ret. Time | Area    | Height | Area%   |
|-------|-----------|---------|--------|---------|
| 1     | 7.415     | 6493249 | 822774 | 96.261  |
| 2     | 8.531     | 252193  | 28264  | 3.739   |
|       |           | 6745442 | 851038 | 100.000 |

<Chromatogram>

mV

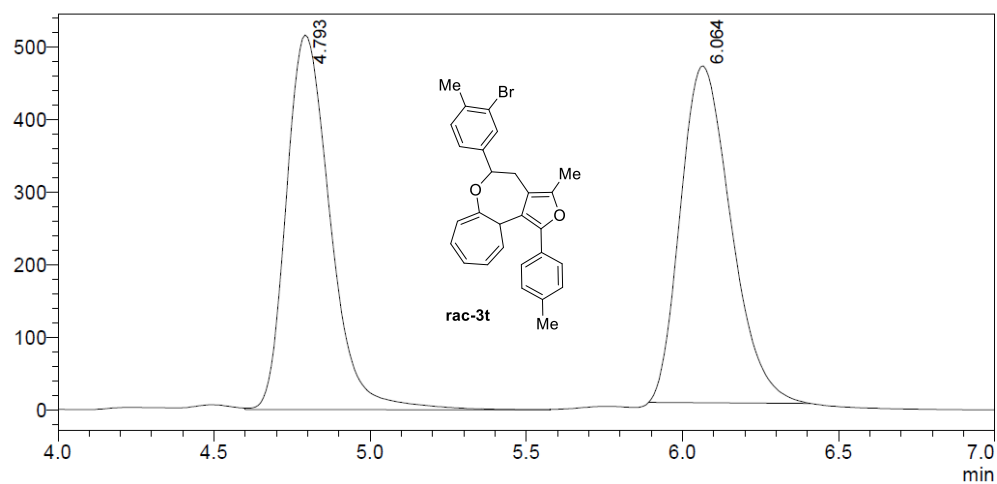

<Peak Table>

| Peak# | Ret. Time | Area     | Height | Area%   |
|-------|-----------|----------|--------|---------|
| 1     | 4.793     | 5054061  | 515663 | 49.187  |
| 2     | 6.064     | 5221160  | 463489 | 50.813  |
|       |           | 10275221 | 979153 | 100.000 |

<Chromatogram>

mV

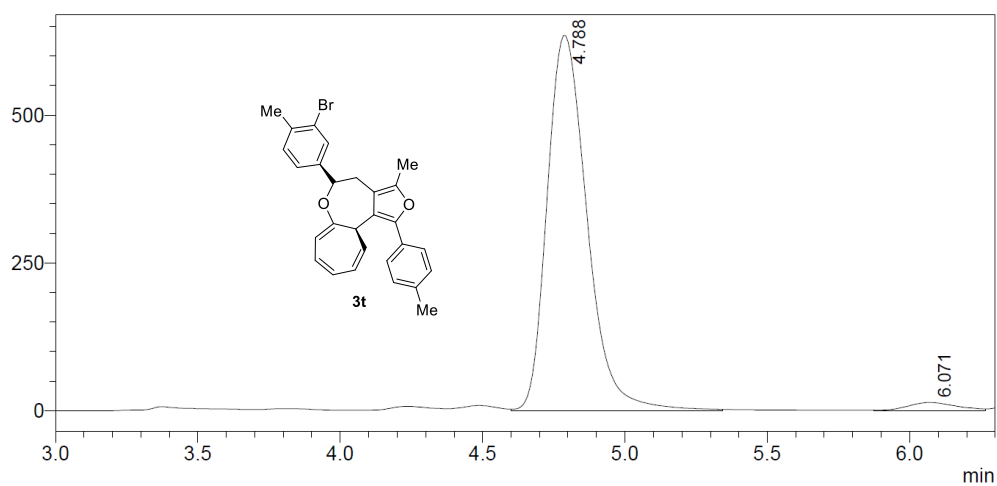

<Peak Table>

| Peak# | Ret. Time | Area    | Height | Area%   |
|-------|-----------|---------|--------|---------|
| 1     | 4.788     | 6217362 | 634459 | 97.242  |
| 2     | 6.071     | 176335  | 14131  | 2.758   |
|       |           | 6393697 | 648590 | 100.000 |

<Chromatogram>

mV

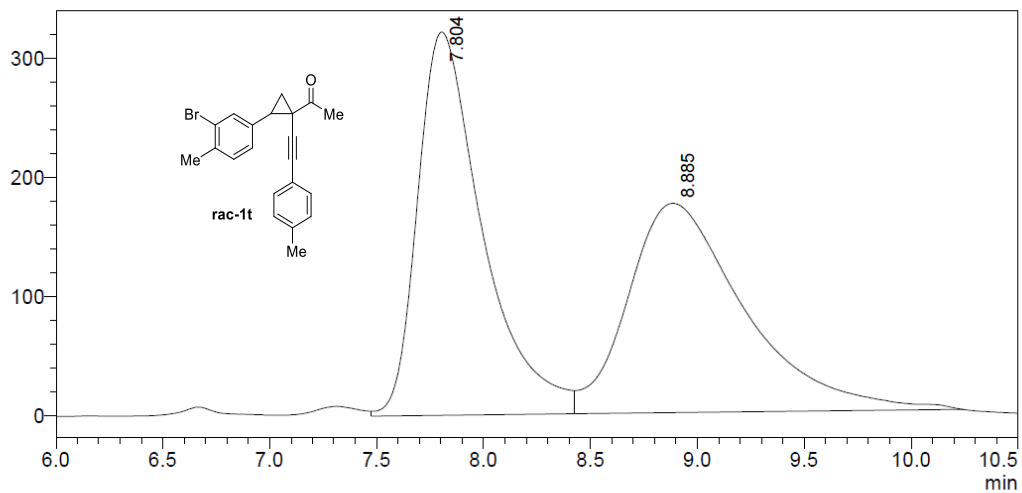

<Peak Table>

| Peak# | Ret. Time | Area     | Height | Area%   |
|-------|-----------|----------|--------|---------|
| 1     | 7.804     | 6782815  | 321357 | 50.362  |
| 2     | 8.885     | 6685339  | 175620 | 49.638  |
|       |           | 13468154 | 496977 | 100.000 |

<Chromatogram>

mV

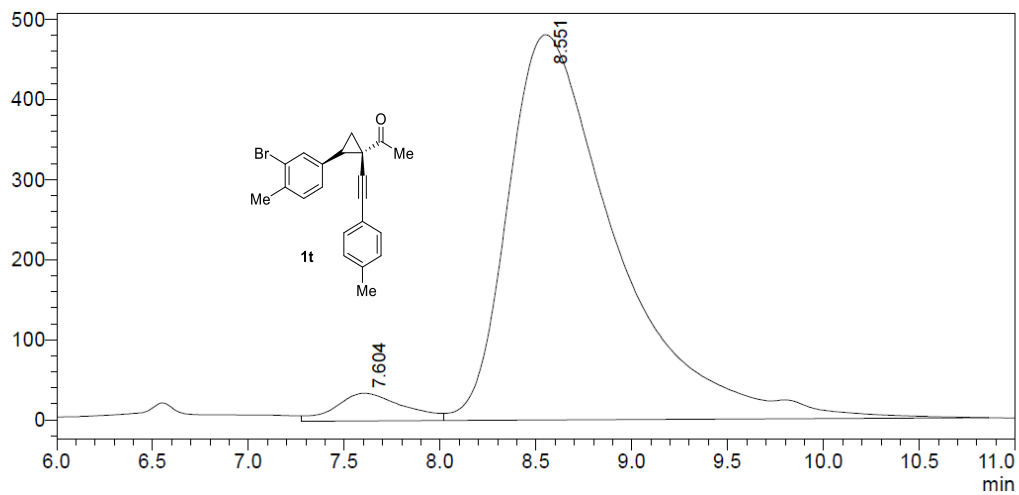

<Peak Table>

| Peak# | Ret. Time | Area     | Height | Area%   |
|-------|-----------|----------|--------|---------|
| 1     | 7.604     | 850008   | 34444  | 4.300   |
| 2     | 8.551     | 18917006 | 480730 | 95.700  |
|       |           | 19767014 | 515174 | 100.000 |

<Chromatogram>

mV

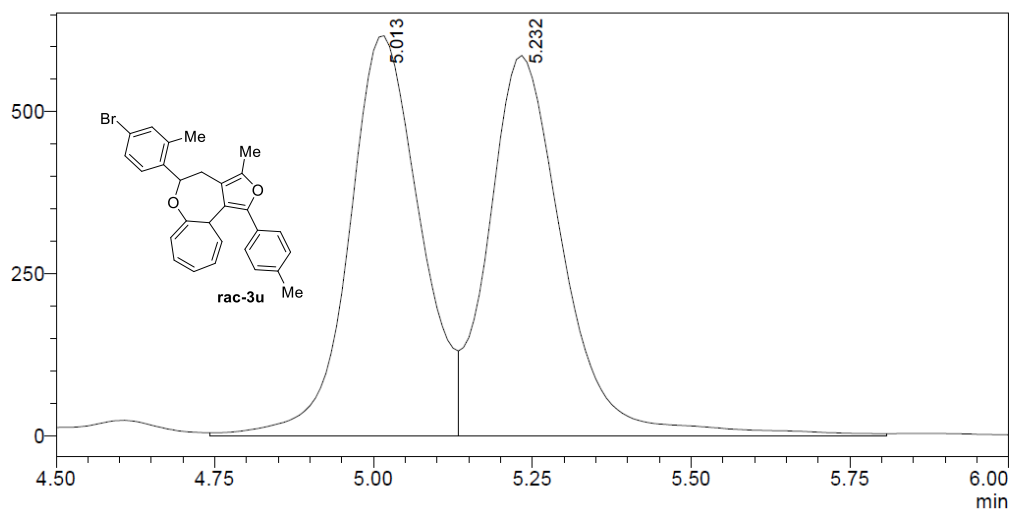

<Peak Table>

| Peak# | Ret. Time | Area    | Height  | Area%   |
|-------|-----------|---------|---------|---------|
| 1     | 5.013     | 4795421 | 617041  | 49.973  |
| 2     | 5.232     | 4800508 | 586797  | 50.027  |
|       |           | 9595929 | 1203838 | 100.000 |

<Chromatogram>

mV

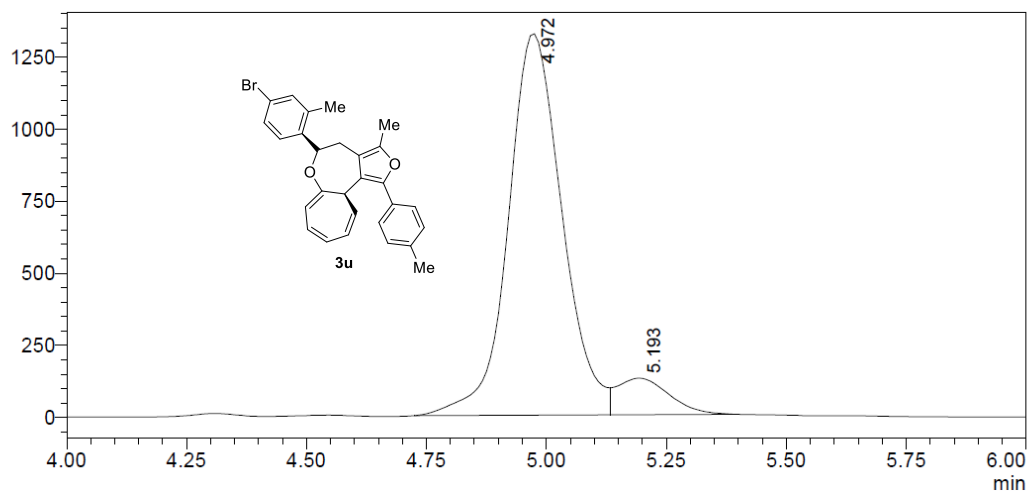

<Peak Table>

| Peak# | Ret. Time | Area     | Height  | Area%   |
|-------|-----------|----------|---------|---------|
| 1     | 4.972     | 10334277 | 1323005 | 91.749  |
| 2     | 5.193     | 929372   | 126452  | 8.251   |
|       |           | 11263649 | 1449457 | 100.000 |

<Chromatogram>

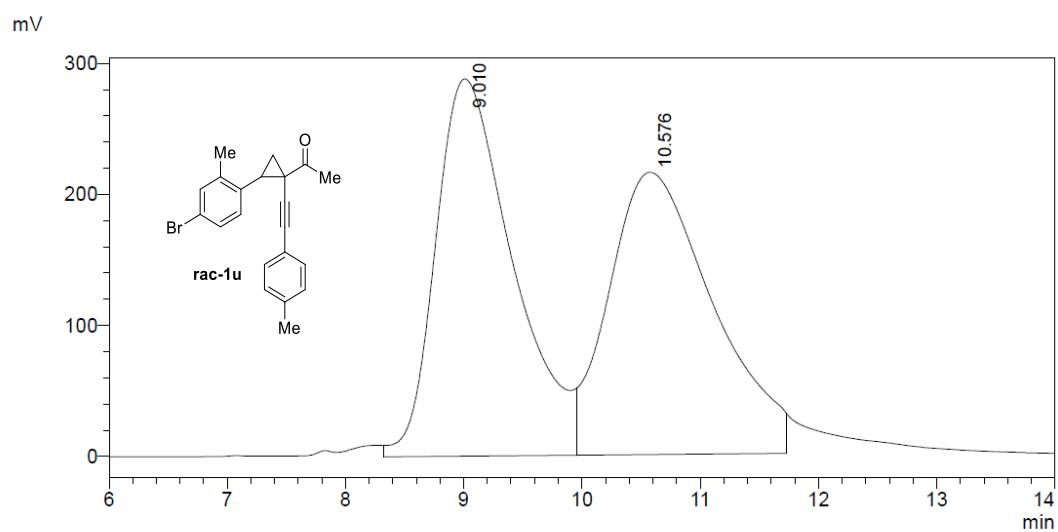

<Peak Table>

| Peak# | Ret. Time | Area     | Height | Area%   |
|-------|-----------|----------|--------|---------|
| 1     | 9.010     | 13074731 | 287851 | 49.988  |
| 2     | 10.576    | 13080785 | 215368 | 50.012  |
|       |           | 26155515 | 503219 | 100.000 |

<Chromatogram>

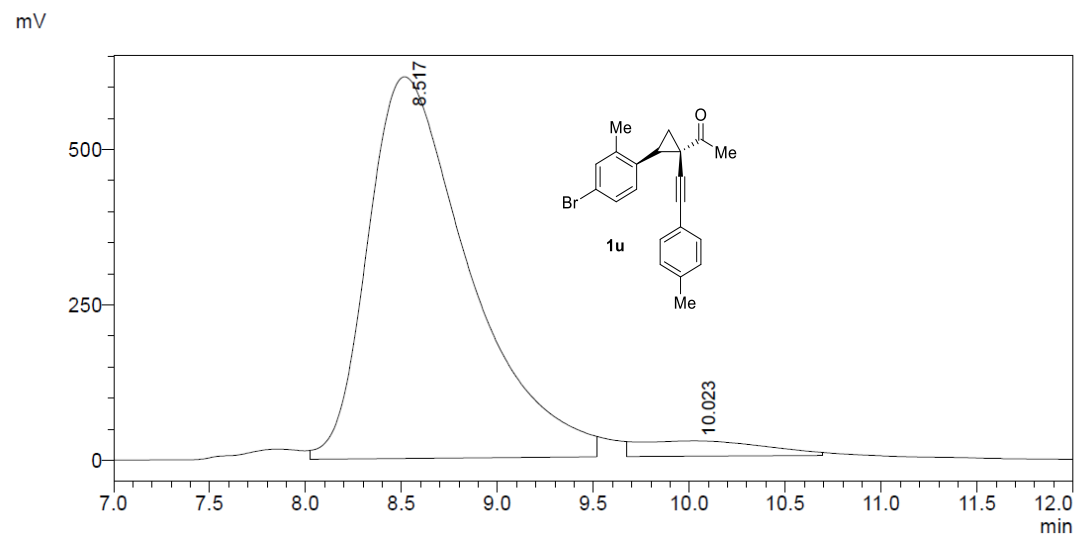

<Peak Table>

| Peak# | Ret. Time | Area     | Height | Area%   |
|-------|-----------|----------|--------|---------|
| 1     | 8.517     | 22518131 | 614221 | 95.242  |
| 2     | 10.023    | 1125019  | 24478  | 4.758   |
|       |           | 23643150 | 638699 | 100.000 |

<Chromatogram>

mV

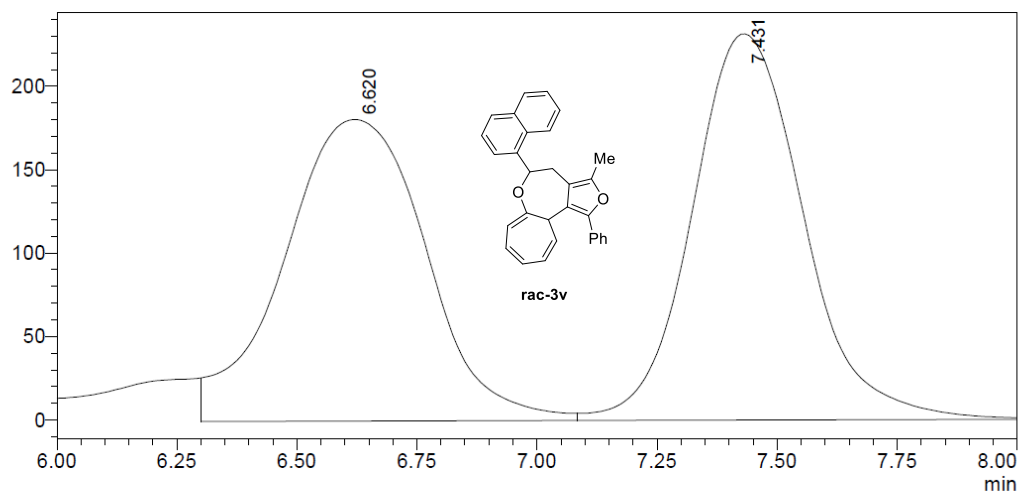

<Peak Table>

| Peak# | Ret. Time | Area    | Height | Area%   |
|-------|-----------|---------|--------|---------|
| 1     | 6.620     | 3708238 | 180656 | 49.796  |
| 2     | 7.431     | 3738561 | 231389 | 50.204  |
|       |           | 7446799 | 412045 | 100.000 |

<Chromatogram>

mV

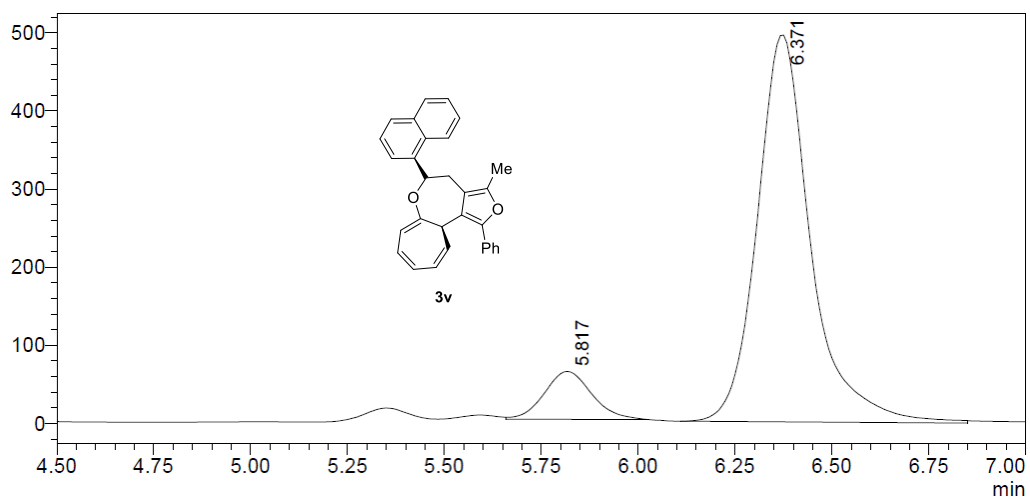

<Peak Table>

| Peak# | Ret. Time | Area    | Height | Area%   |
|-------|-----------|---------|--------|---------|
| 1     | 5.817     | 522206  | 61424  | 9.921   |
| 2     | 6.371     | 4741214 | 495177 | 90.079  |
|       |           | 5263420 | 556602 | 100.000 |

<Chromatogram>

mV

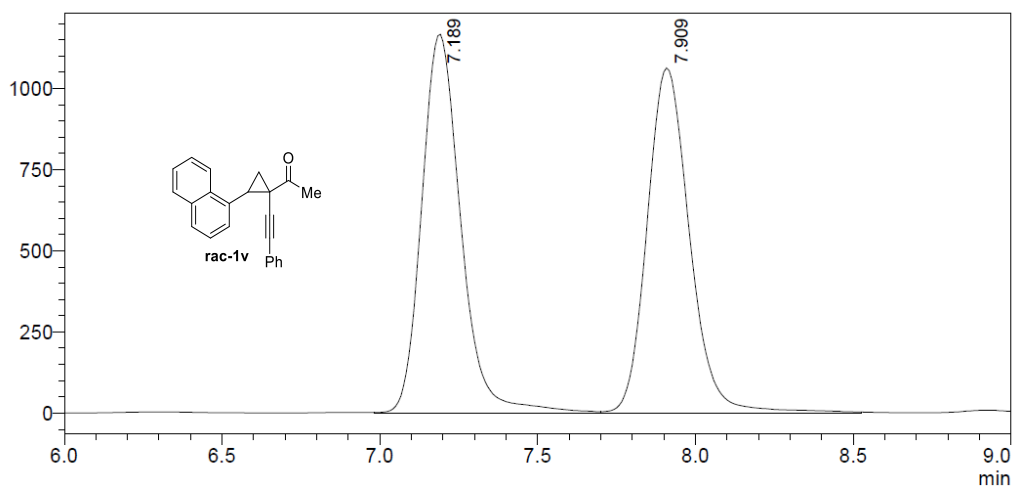

<Peak Table>

| Peak# | Ret. Time | Area     | Height  | Area%   |
|-------|-----------|----------|---------|---------|
| 1     | 7.189     | 10084672 | 1166725 | 50.274  |
| 2     | 7.909     | 9974807  | 1063033 | 49.726  |
|       |           | 20059479 | 2229758 | 100.000 |

<Chromatogram>

mV

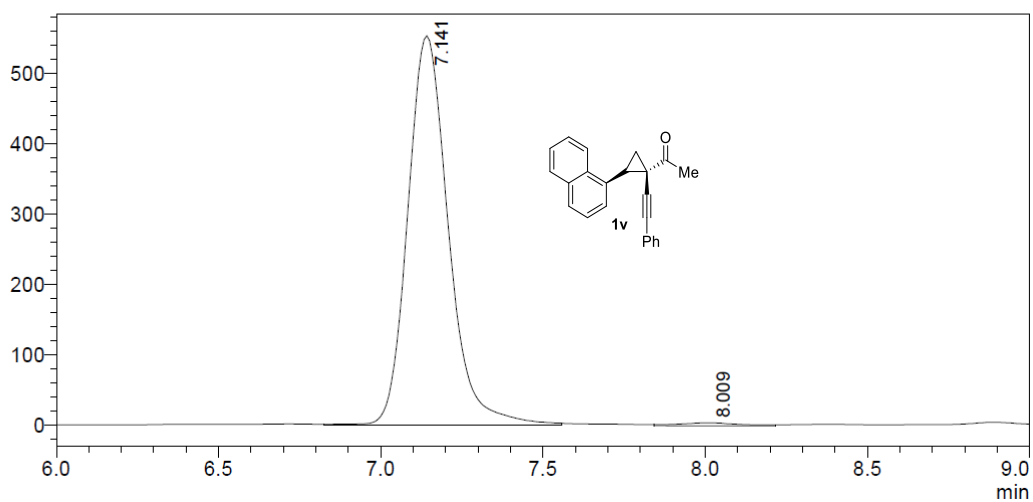

<Peak Table>

| Peak# | Ret. Time | Area    | Height | Area%   |
|-------|-----------|---------|--------|---------|
| 1     | 7.141     | 4825749 | 553514 | 98.872  |
| 2     | 8.009     | 55058   | 4107   | 1.128   |
|       |           | 4880807 | 557622 | 100.000 |



<Chromatogram>

mV

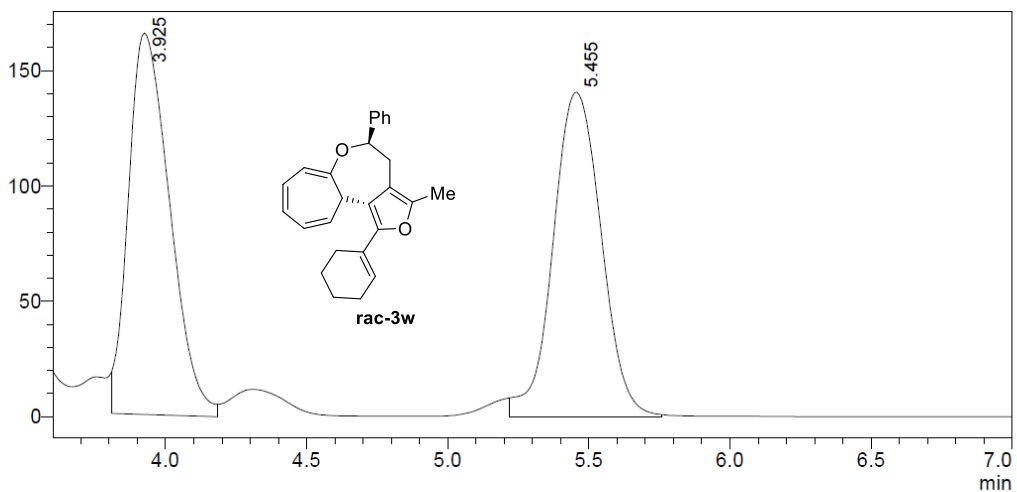

<Peak Table>

| Peak# | Ret. Time | Area    | Height | Area%   |
|-------|-----------|---------|--------|---------|
| 1     | 3.925     | 1679722 | 165463 | 50.101  |
| 2     | 5.455     | 1672960 | 140614 | 49.899  |
|       |           | 3352682 | 306077 | 100.000 |

<Chromatogram>

mV

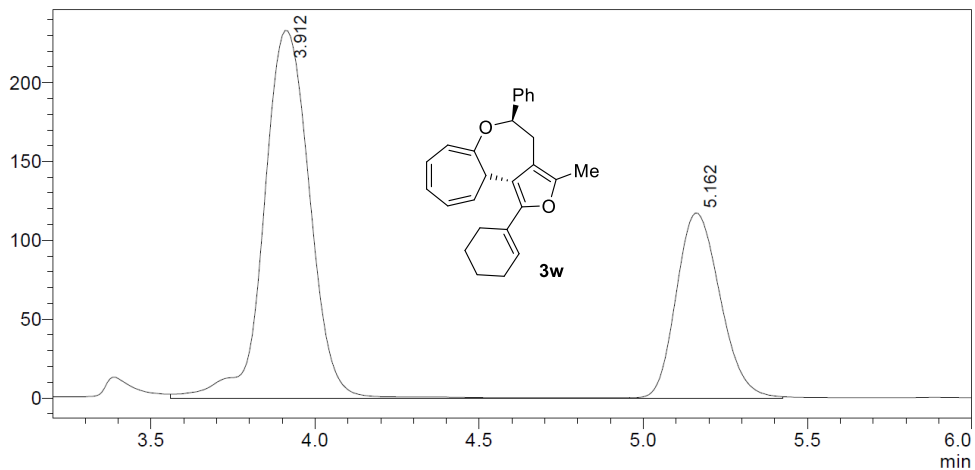

<Peak Table>

| Peak# | Ret. Time | Area    | Height | Area%   |
|-------|-----------|---------|--------|---------|
| 1     | 3.912     | 2264960 | 233238 | 67.521  |
| 2     | 5.162     | 1089511 | 117384 | 32.479  |
|       |           | 3354471 | 350622 | 100.000 |

<Chromatogram>

mV

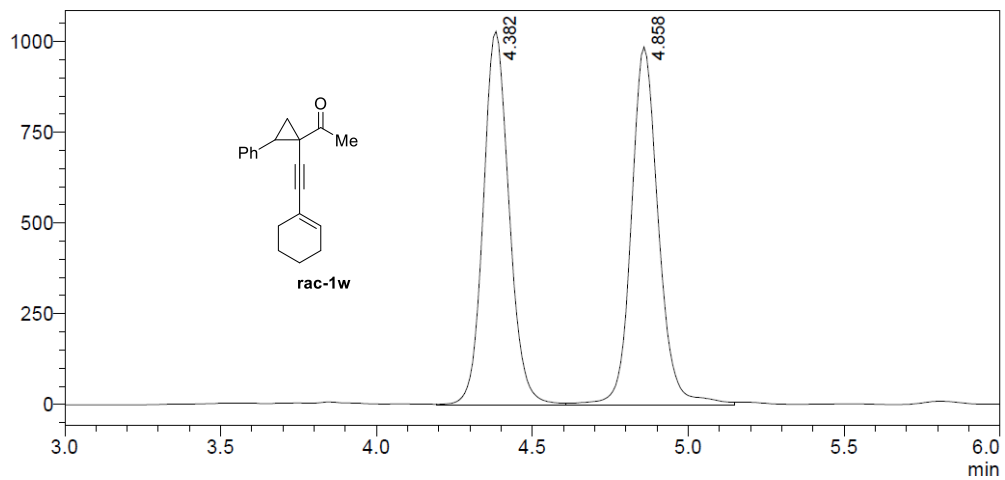

<Peak Table>

| Peak# | Ret. Time | Area     | Height  | Area%   |
|-------|-----------|----------|---------|---------|
| 1     | 4.382     | 5939476  | 1029039 | 49.775  |
| 2     | 4.858     | 5993077  | 985437  | 50.225  |
|       |           | 11932553 | 2014477 | 100.000 |

<Chromatogram>

mV

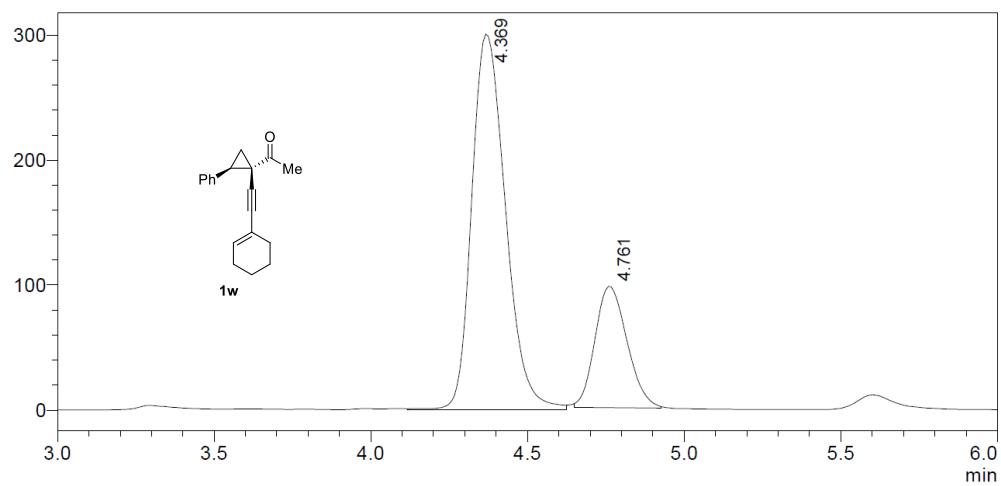

<Peak Table>

| Peak# | Ret. Time | Area    | Height | Area%   |
|-------|-----------|---------|--------|---------|
| 1     | 4.369     | 2256226 | 300805 | 76.515  |
| 2     | 4.761     | 692522  | 97120  | 23.485  |
|       |           | 2948748 | 397925 | 100.000 |

<Chromatogram>

mV

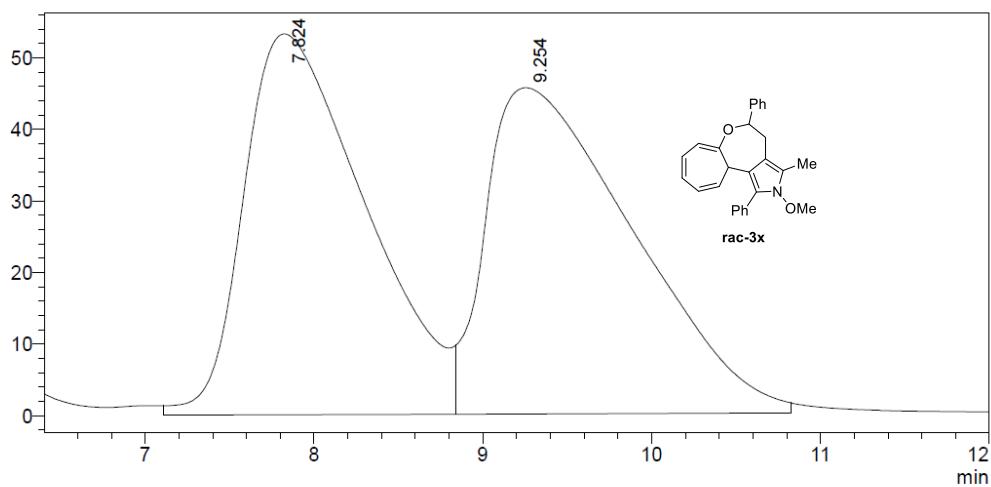

<Peak Table>

| Peak# | Ret. Time | Area    | Height | Area%   |
|-------|-----------|---------|--------|---------|
| 1     | 7.824     | 2671041 | 53204  | 49.228  |
| 2     | 9.254     | 2754865 | 45568  | 50.772  |
|       |           | 5425906 | 98772  | 100.000 |

<Chromatogram>

mV

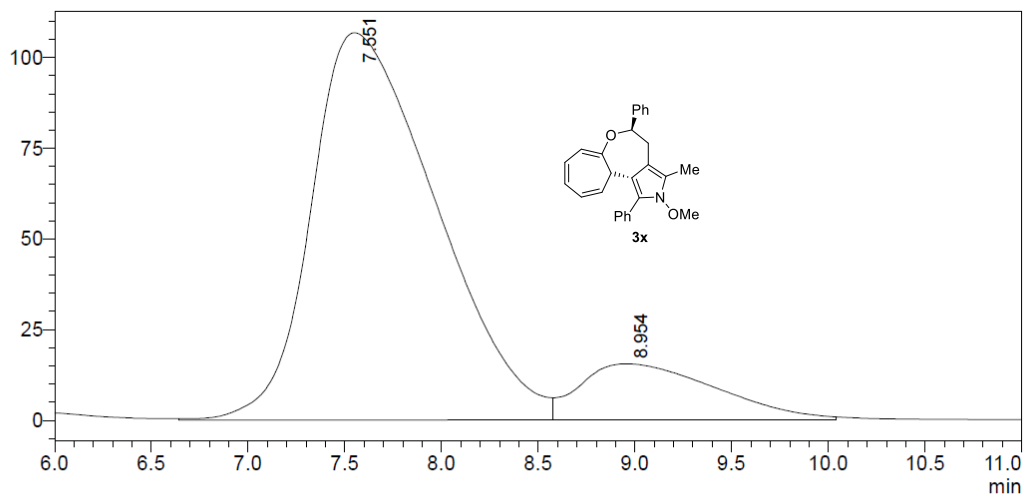

<Peak Table>

| Peak# | Ret. Time | Area    | Height | Area%   |
|-------|-----------|---------|--------|---------|
| 1     | 7.551     | 4795187 | 106744 | 86.384  |
| 2     | 8.954     | 755812  | 15497  | 13.616  |
|       |           | 5550999 | 122241 | 100.000 |

<Chromatogram>

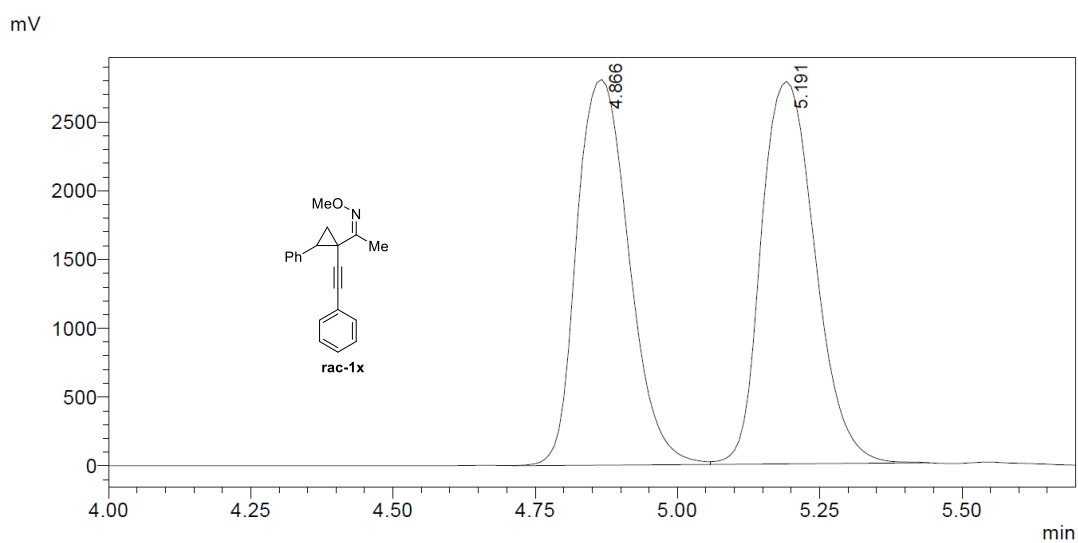

<Peak Table>

| Peak# | Ret. Time | Area     | Height  | Area%   |
|-------|-----------|----------|---------|---------|
| 1     | 4.866     | 17918018 | 2804583 | 49.450  |
| 2     | 5.191     | 18316856 | 2779849 | 50.550  |
|       |           | 36234875 | 5584432 | 100.000 |

<Chromatogram>

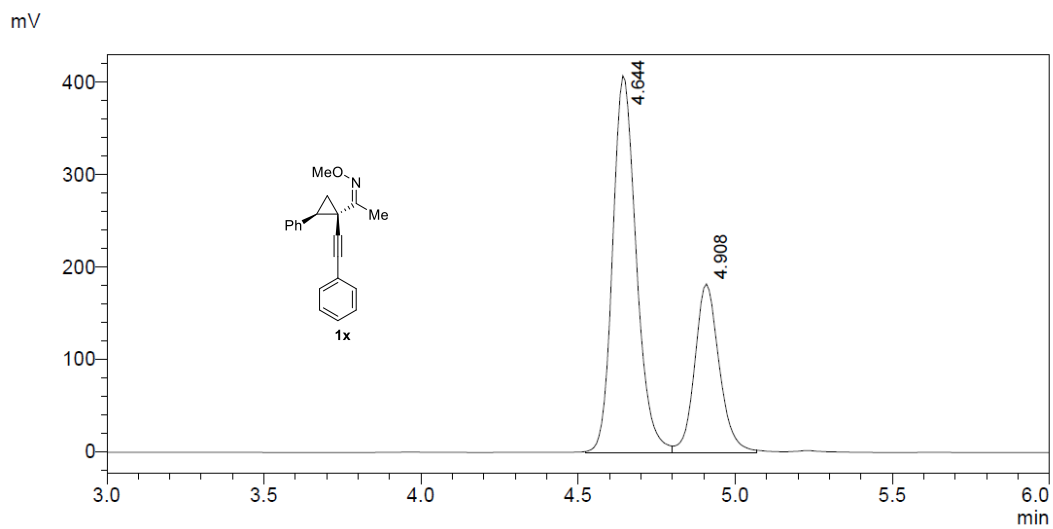

<Peak Table>

| Peak# | Ret. Time | Area    | Height | Area%   |
|-------|-----------|---------|--------|---------|
| 1     | 4.644     | 2130642 | 407799 | 68.348  |
| 2     | 4.908     | 986717  | 182263 | 31.652  |
|       |           | 3117359 | 590062 | 100.000 |

<Chromatogram>

mV

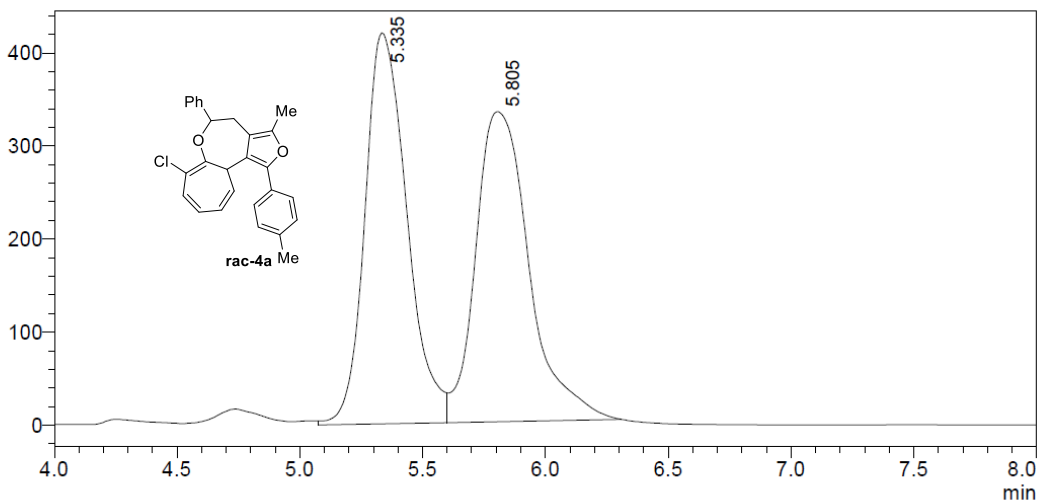

<Peak Table>

| Peak# | Ret. Time | Area     | Height | Area%   |
|-------|-----------|----------|--------|---------|
| 1     | 5.335     | 5006545  | 420572 | 49.818  |
| 2     | 5.805     | 5043101  | 333278 | 50.182  |
|       |           | 10049646 | 753850 | 100.000 |

<Chromatogram>

mV

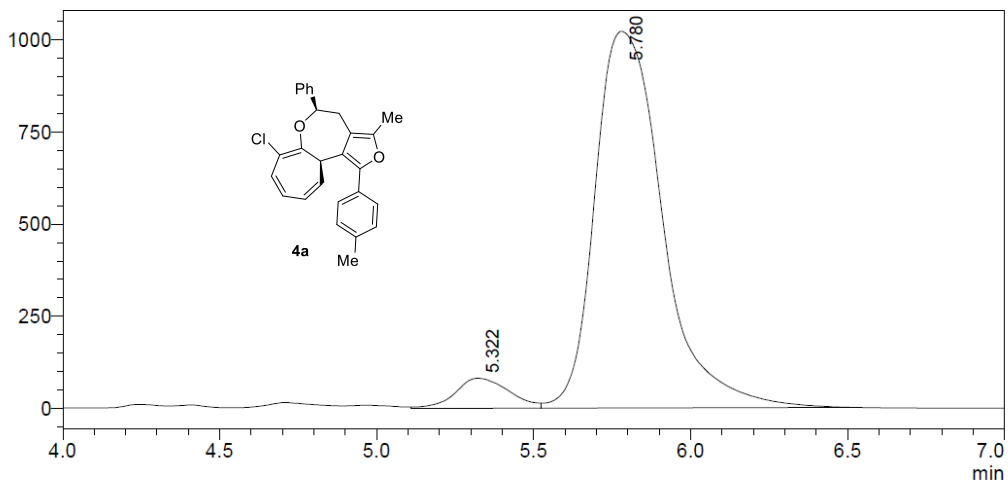

<Peak Table>

| Peak# | Ret. Time | Area     | Height  | Area%   |
|-------|-----------|----------|---------|---------|
| 1     | 5.322     | 970719   | 81787   | 5.949   |
| 2     | 5.780     | 15346844 | 1022212 | 94.051  |
|       |           | 16317563 | 1103999 | 100.000 |

<Chromatogram>

mV

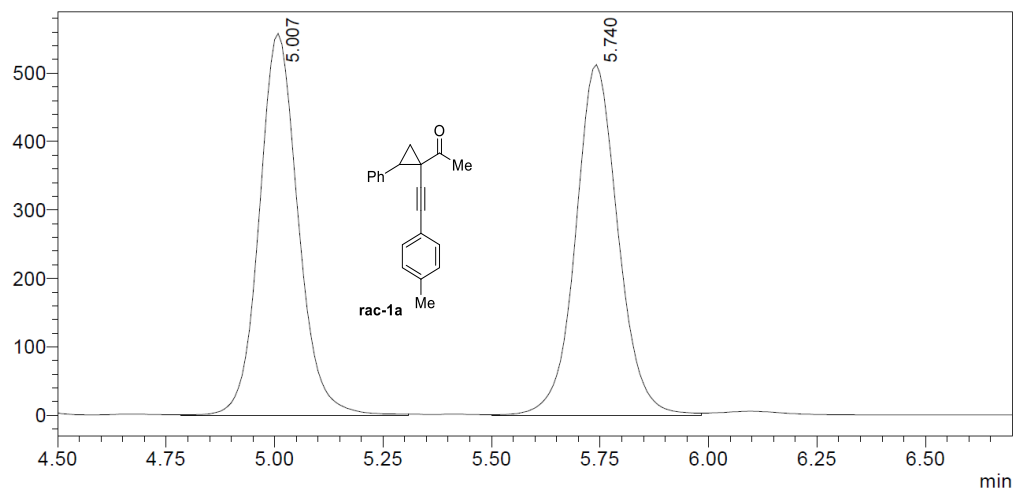

<Peak Table>

| Peak# | Ret. Time | Area    | Height  | Area%   |
|-------|-----------|---------|---------|---------|
| 1     | 5.007     | 3475061 | 558151  | 49.858  |
| 2     | 5.740     | 3494896 | 512551  | 50.142  |
|       |           | 6969958 | 1070702 | 100.000 |

<Chromatogram>

mV

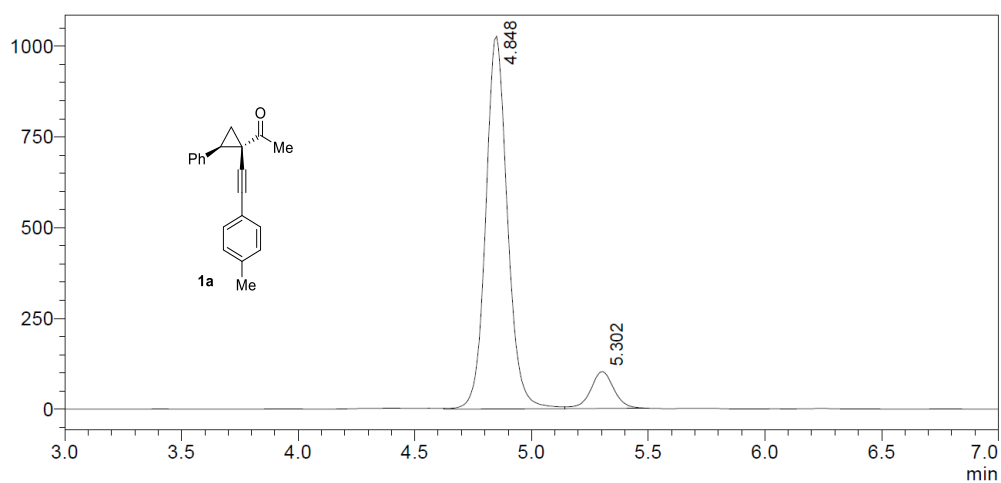

<Peak Table>

| Peak# | Ret. Time | Area    | Height  | Area%   |
|-------|-----------|---------|---------|---------|
| 1     | 4.848     | 6661616 | 1026986 | 90.486  |
| 2     | 5.302     | 700444  | 101755  | 9.514   |
|       |           | 7362060 | 1128741 | 100.000 |

<Chromatogram>

mV

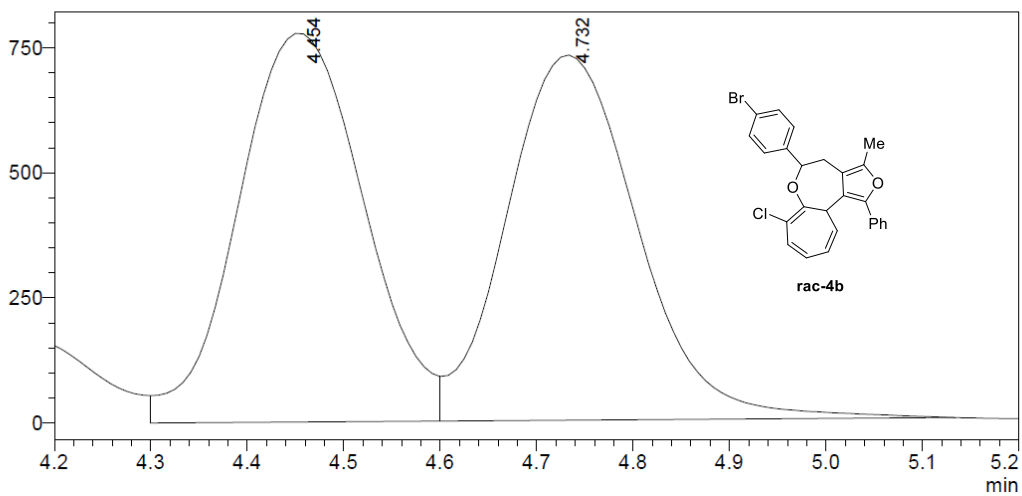

<Peak Table>

| Peak# | Ret. Time | Area     | Height  | Area%   |
|-------|-----------|----------|---------|---------|
| 1     | 4.454     | 7021508  | 776879  | 50.580  |
| 2     | 4.732     | 6860580  | 729825  | 49.420  |
|       |           | 13882088 | 1506705 | 100.000 |

<Chromatogram>

mV

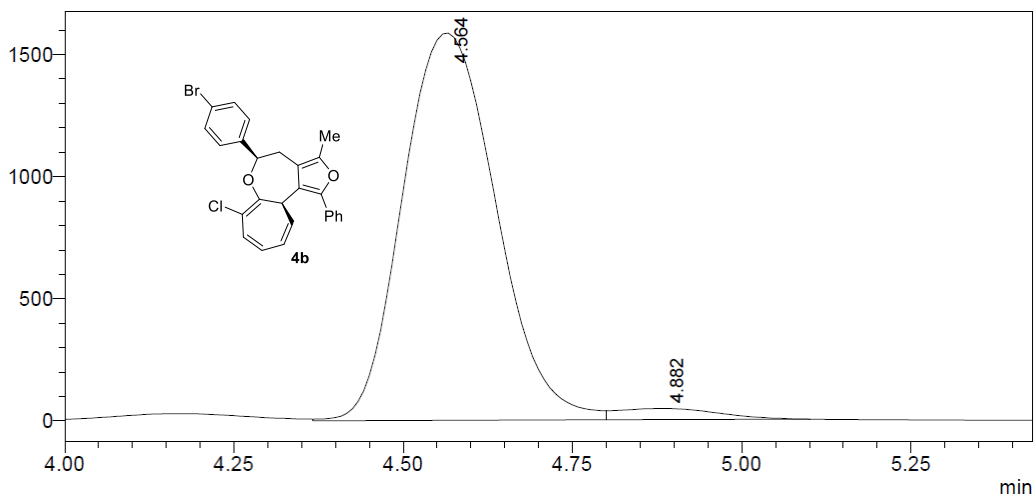

<Peak Table>

| Peak# | Ret. Time | Area     | Height  | Area%   |
|-------|-----------|----------|---------|---------|
| 1     | 4.564     | 15214925 | 1586477 | 97.051  |
| 2     | 4.882     | 462370   | 45847   | 2.949   |
|       |           | 15677294 | 1632324 | 100.000 |

<Chromatogram>

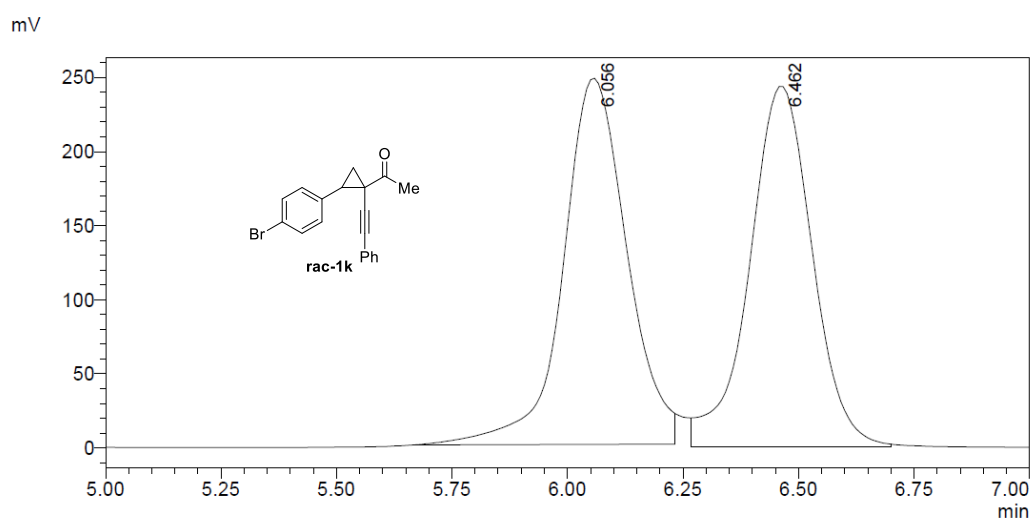

<Peak Table>

| Peak# | Ret. Time | Area    | Height | Area%   |
|-------|-----------|---------|--------|---------|
| 1     | 6.056     | 2377005 | 247125 | 50.954  |
| 2     | 6.462     | 2288027 | 243098 | 49.046  |
|       |           | 4665032 | 490223 | 100.000 |

<Chromatogram>

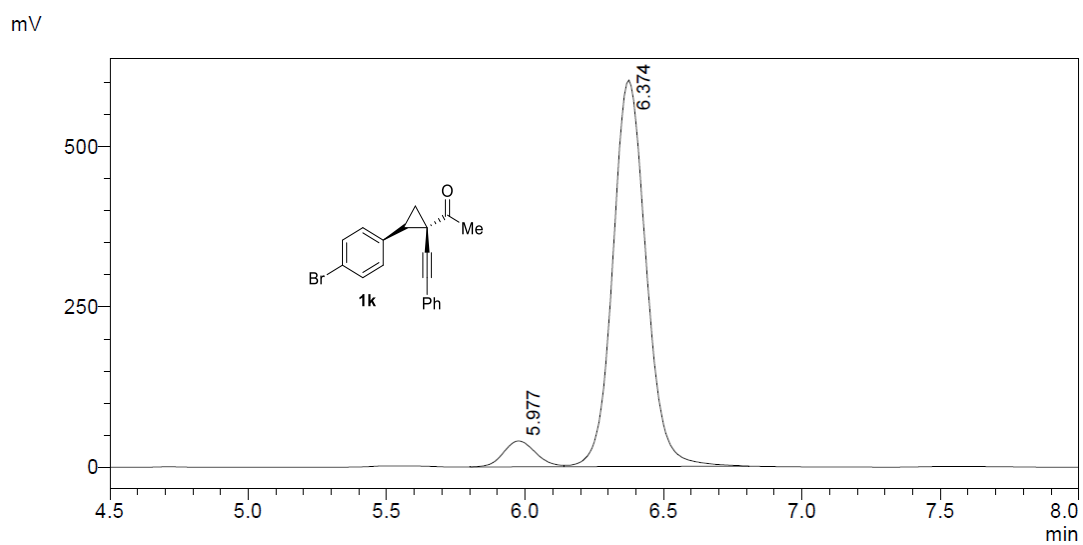

<Peak Table>

| Peak# | Ret. Time | Area    | Height | Area%   |
|-------|-----------|---------|--------|---------|
| 1     | 5.977     | 326188  | 40486  | 6.074   |
| 2     | 6.374     | 5043623 | 602250 | 93.926  |
|       |           | 5369811 | 642736 | 100.000 |



<Chromatogram>

mV

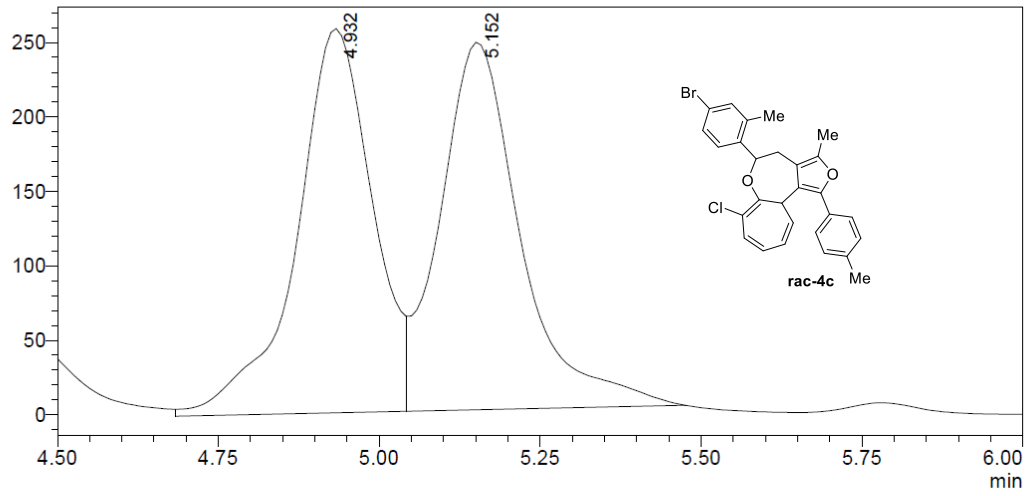

<Peak Table>

| Peak# | Ret. Time | Area    | Height | Area%   |
|-------|-----------|---------|--------|---------|
| 1     | 4.932     | 2121845 | 258030 | 49.845  |
| 2     | 5.152     | 2135063 | 246742 | 50.155  |
|       |           | 4256908 | 504772 | 100.000 |

<Chromatogram>

mV

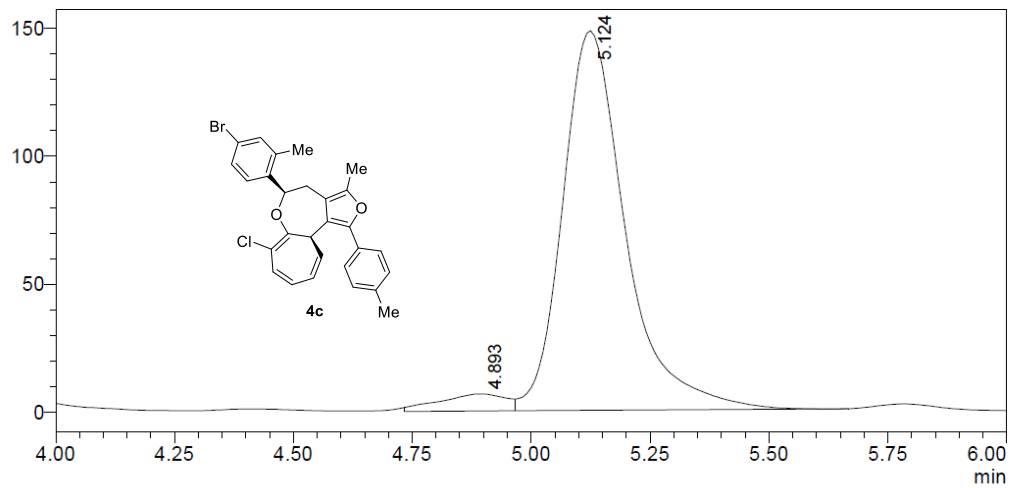

<Peak Table>

| Peak# | Ret. Time | Area    | Height | Area%   |
|-------|-----------|---------|--------|---------|
| 1     | 4.893     | 66599   | 6708   | 4.660   |
| 2     | 5.124     | 1362609 | 148245 | 95.340  |
|       |           | 1429208 | 154953 | 100.000 |

<Chromatogram>

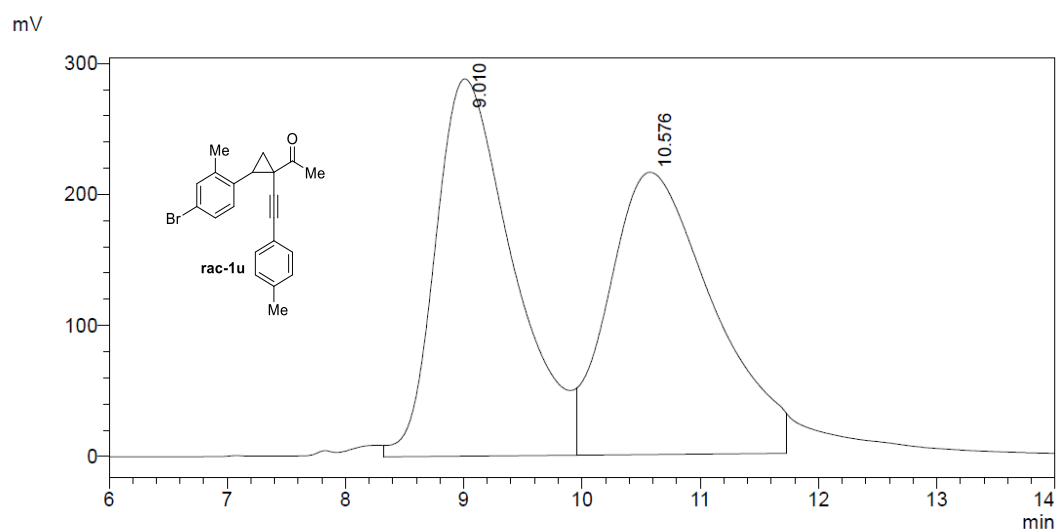

<Peak Table>

| Peak# | Ret. Time | Area     | Height | Area%   |
|-------|-----------|----------|--------|---------|
| 1     | 9.010     | 13074731 | 287851 | 49.988  |
| 2     | 10.576    | 13080785 | 215368 | 50.012  |
|       |           | 26155515 | 503219 | 100.000 |

<Chromatogram>

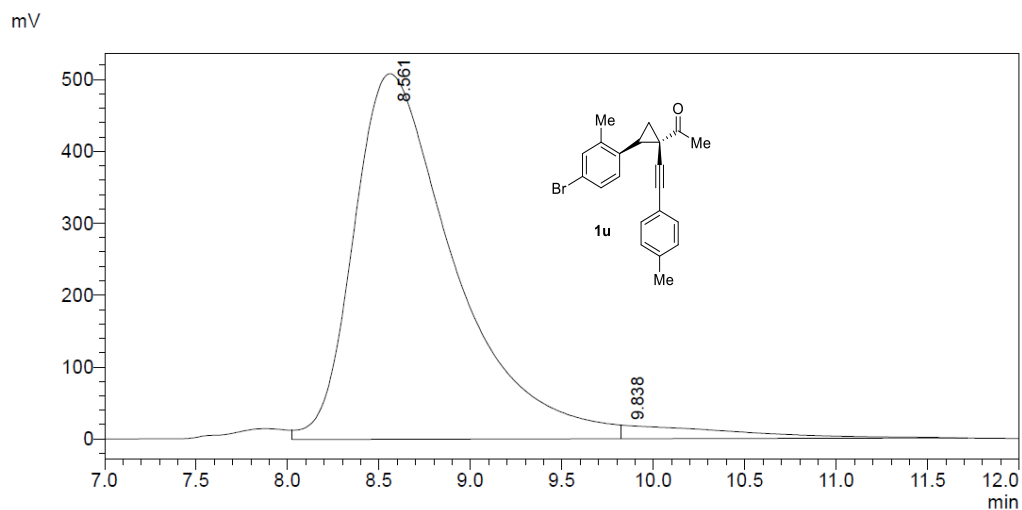

<Peak Table>

| Peak# | Ret. Time | Area     | Height | Area%   |
|-------|-----------|----------|--------|---------|
| 1     | 8.561     | 19488391 | 508547 | 96.127  |
| 2     | 9.838     | 785099   | 18799  | 3.873   |
|       |           | 20273490 | 527347 | 100.000 |

<Chromatogram>

mV

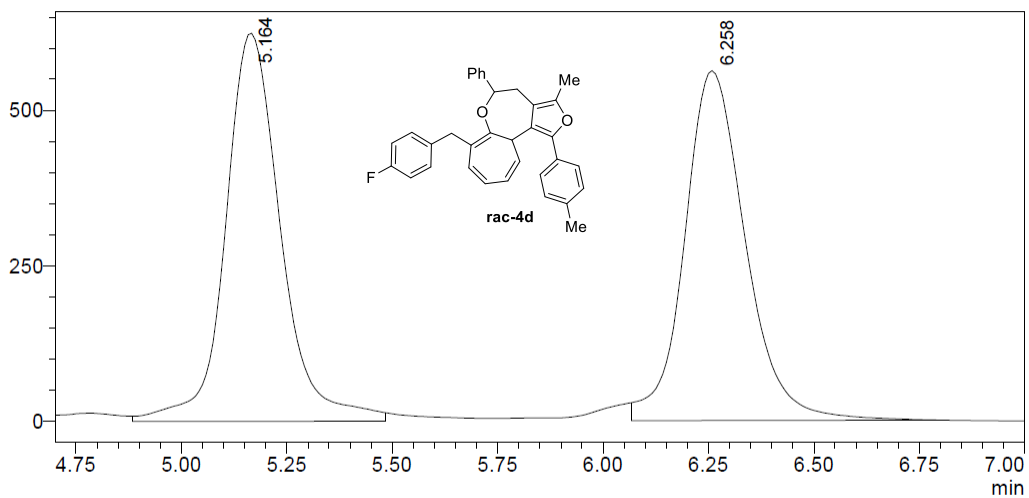

<Peak Table>

| Peak# | Ret. Time | Area     | Height  | Area%   |
|-------|-----------|----------|---------|---------|
| 1     | 5.164     | 5684031  | 624250  | 50.141  |
| 2     | 6.258     | 5651967  | 562652  | 49.859  |
|       |           | 11335999 | 1186902 | 100.000 |

<Chromatogram>

mV

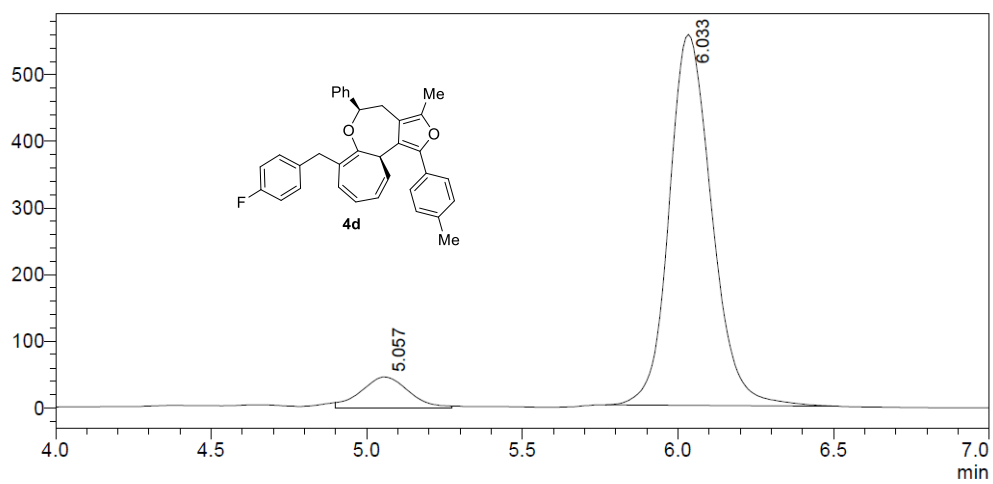

<Peak Table>

| Peak# | Ret. Time | Area    | Height | Area%   |
|-------|-----------|---------|--------|---------|
| 1     | 5.057     | 496042  | 46512  | 8.553   |
| 2     | 6.033     | 5303350 | 556501 | 91.447  |
|       |           | 5799393 | 603013 | 100.000 |

<Chromatogram>

mV

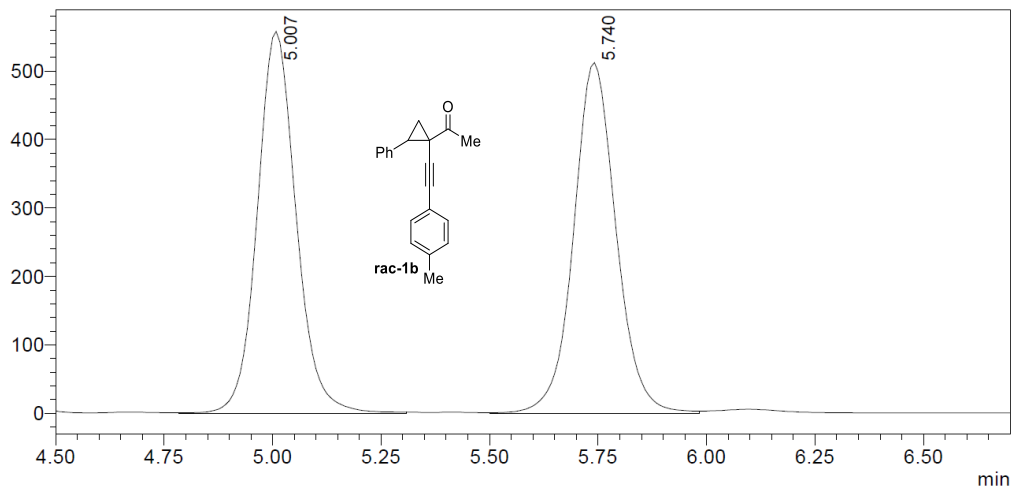

<Peak Table>

| Peak# | Ret. Time | Area    | Height  | Area%   |
|-------|-----------|---------|---------|---------|
| 1     | 5.007     | 3475061 | 558151  | 49.858  |
| 2     | 5.740     | 3494896 | 512551  | 50.142  |
|       |           | 6969958 | 1070702 | 100.000 |

<Chromatogram>

mV

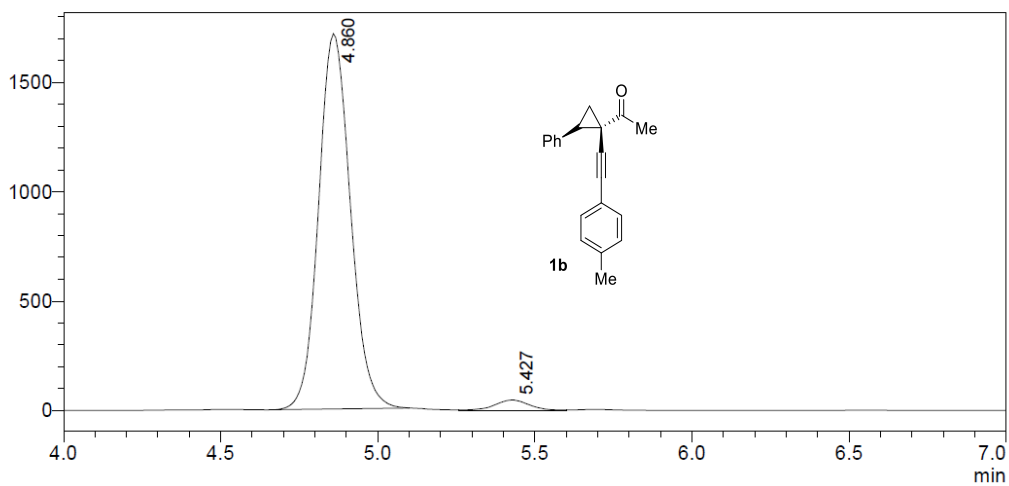

<Peak Table>

| Peak# | Ret. Time | Area     | Height  | Area%   |
|-------|-----------|----------|---------|---------|
| 1     | 4.860     | 12083746 | 1715256 | 96.943  |
| 2     | 5.427     | 381094   | 48427   | 3.057   |
|       |           | 12464840 | 1763683 | 100.000 |

<Chromatogram>

mV

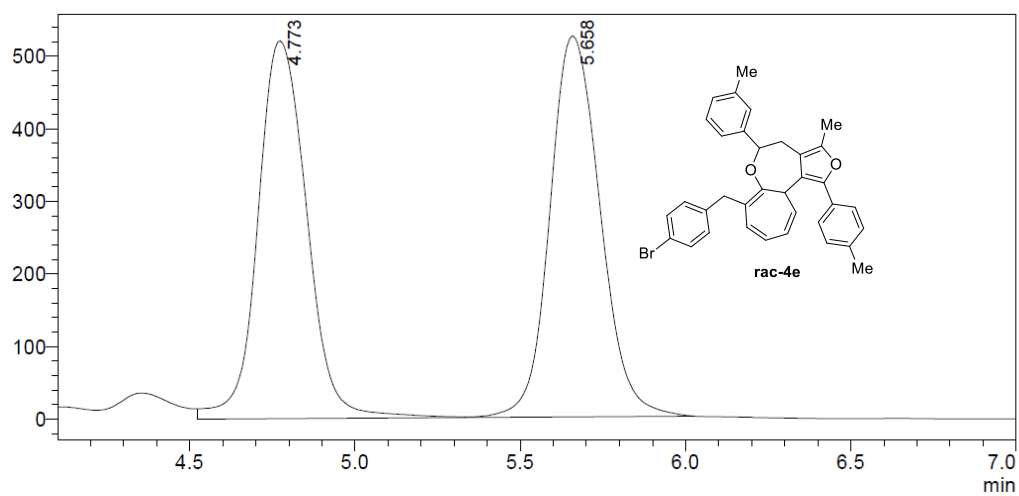

<Peak Table>

| Peak# | Ret. Time | Area     | Height  | Area%   |
|-------|-----------|----------|---------|---------|
| 1     | 4.773     | 5371683  | 520739  | 49.120  |
| 2     | 5.658     | 5564244  | 525546  | 50.880  |
|       |           | 10935926 | 1046284 | 100.000 |

<Chromatogram>

mV

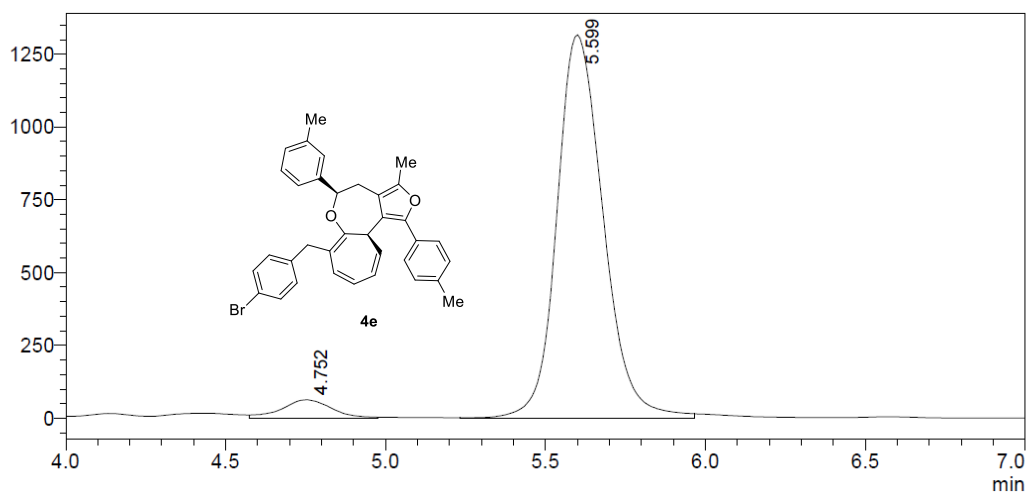

<Peak Table>

| Peak# | Ret. Time | Area     | Height  | Area%   |
|-------|-----------|----------|---------|---------|
| 1     | 4.752     | 694840   | 63312   | 4.973   |
| 2     | 5.599     | 13276137 | 1316871 | 95.027  |
|       |           | 13970977 | 1380183 | 100.000 |

<Chromatogram>

mV

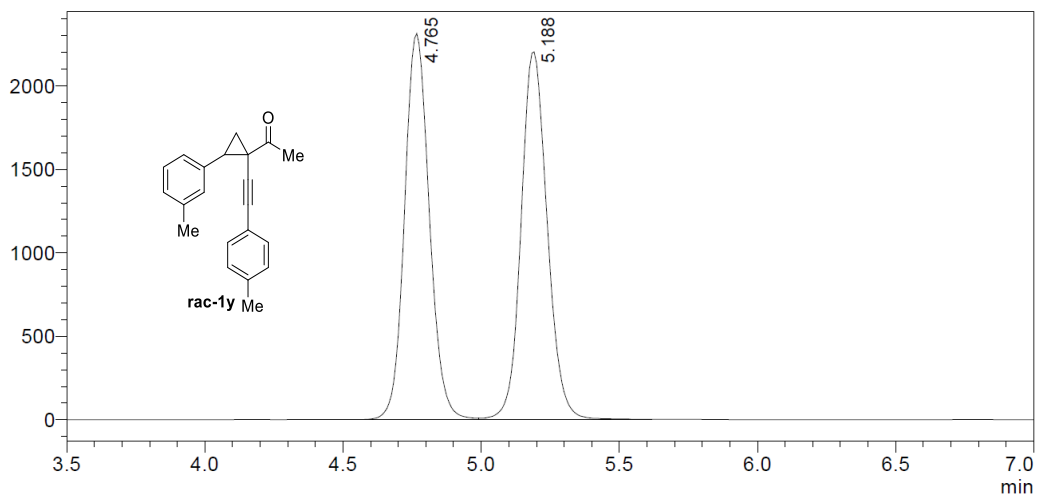

<Peak Table>

| Peak# | Ret. Time | Area     | Height  | Area%   |
|-------|-----------|----------|---------|---------|
| 1     | 4.765     | 14476586 | 2315616 | 49.798  |
| 2     | 5.188     | 14594217 | 2205568 | 50.202  |
|       |           | 29070803 | 4521184 | 100.000 |

<Chromatogram>

mV

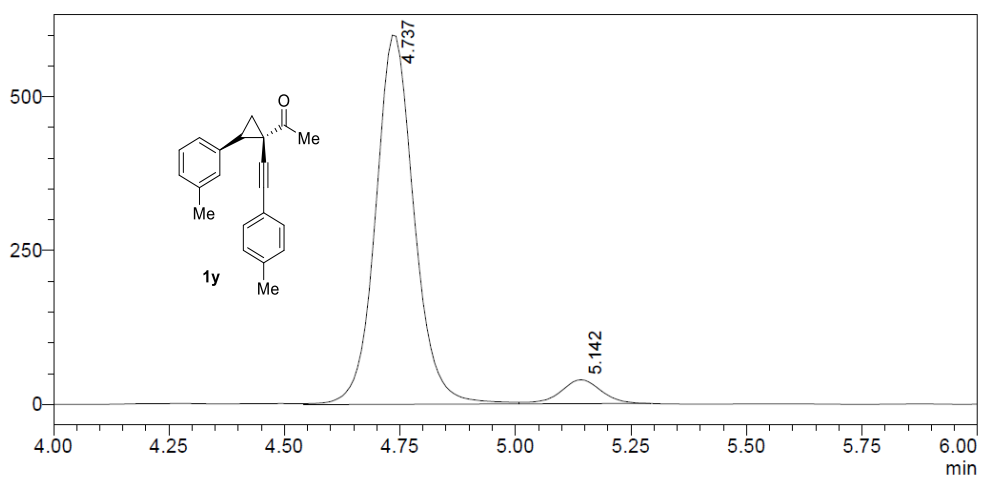

<Peak Table>

| Peak# | Ret. Time | Area    | Height | Area%   |
|-------|-----------|---------|--------|---------|
| 1     | 4.737     | 3488424 | 599666 | 93.595  |
| 2     | 5.142     | 238740  | 39094  | 6.405   |
|       |           | 3727165 | 638760 | 100.000 |

<Chromatogram>

mV

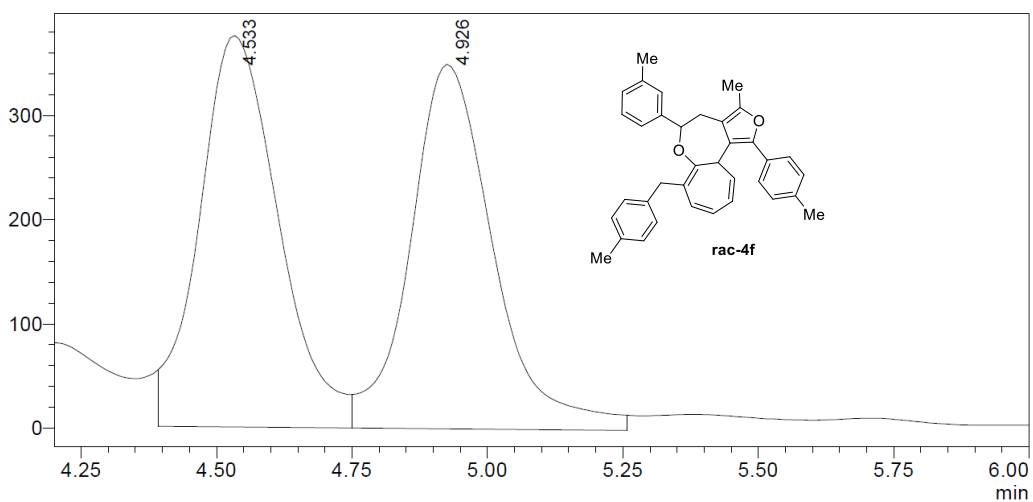

<Peak Table>

| Peak# | Ret. Time | Area    | Height | Area%   |
|-------|-----------|---------|--------|---------|
| 1     | 4.533     | 3821090 | 375917 | 50.648  |
| 2     | 4.926     | 3723306 | 349918 | 49.352  |
|       |           | 7544396 | 725835 | 100.000 |

<Chromatogram>

mV

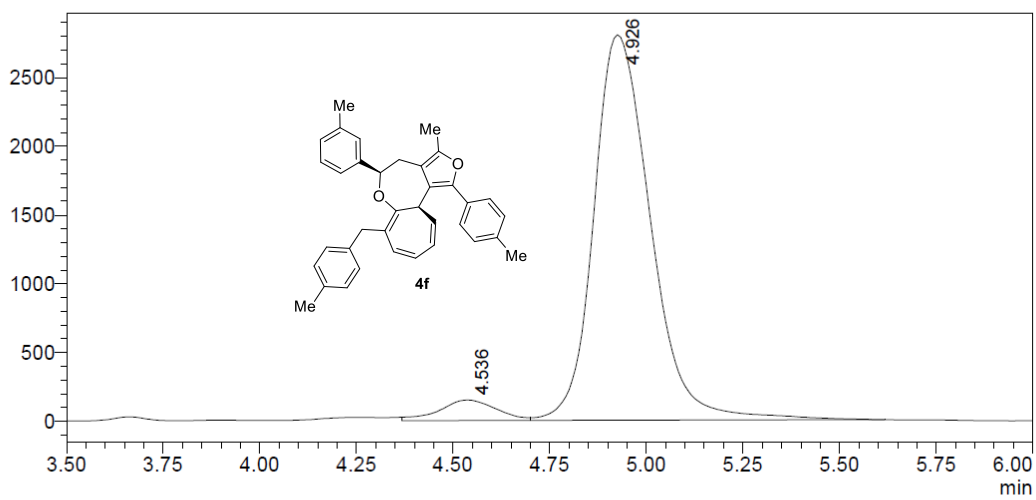

<Peak Table>

| Peak# | Ret. Time | Area     | Height  | Area%   |
|-------|-----------|----------|---------|---------|
| 1     | 4.536     | 1517214  | 148142  | 5.031   |
| 2     | 4.926     | 28637287 | 2804953 | 94.969  |
|       |           | 30154501 | 2953096 | 100.000 |

<Chromatogram>

mV

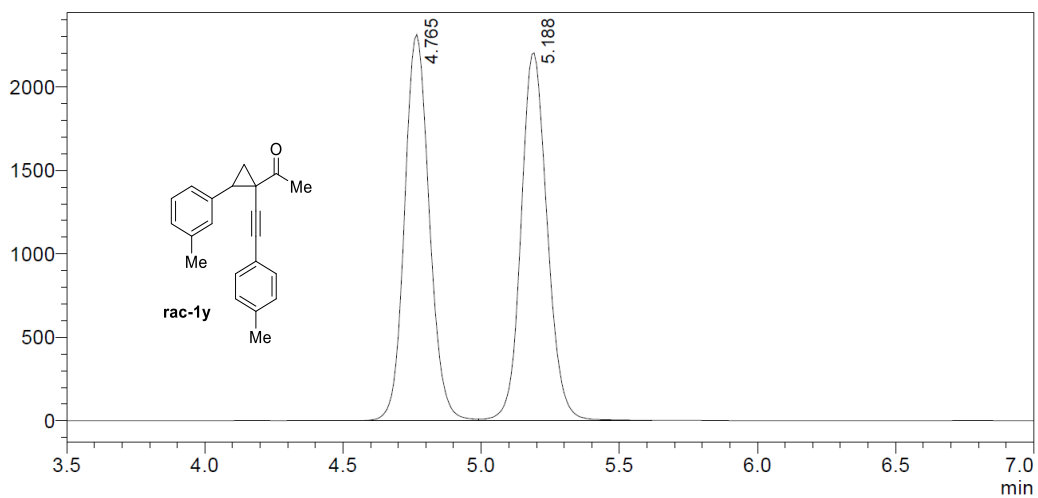

<Peak Table>

| Peak# | Ret. Time | Area     | Height  | Area%   |
|-------|-----------|----------|---------|---------|
| 1     | 4.765     | 14476586 | 2315616 | 49.798  |
| 2     | 5.188     | 14594217 | 2205568 | 50.202  |
|       |           | 29070803 | 4521184 | 100.000 |

<Chromatogram>

mV

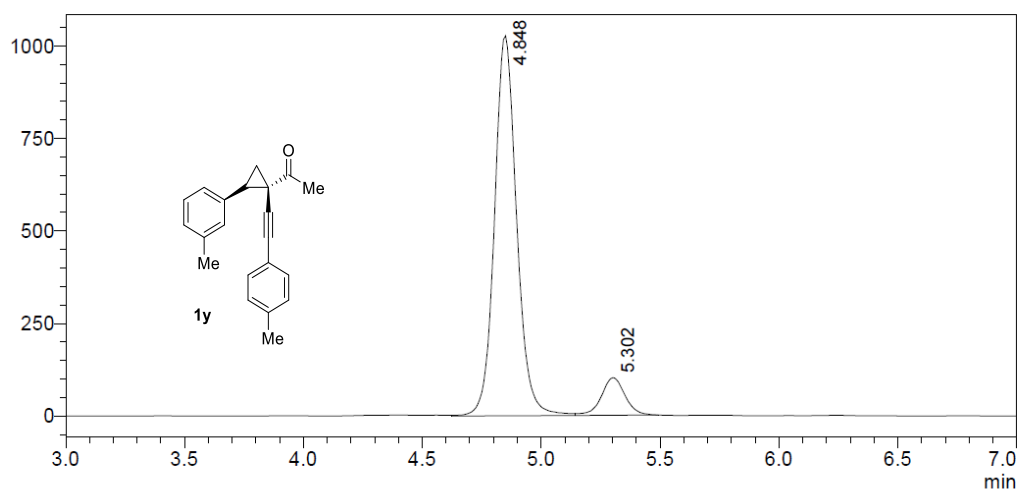

<Peak Table>

| Peak# | Ret. Time | Area    | Height  | Area%   |
|-------|-----------|---------|---------|---------|
| 1     | 4.848     | 6661616 | 1026986 | 90.486  |
| 2     | 5.302     | 700444  | 101755  | 9.514   |
|       |           | 7362060 | 1128741 | 100.000 |



<Chromatogram>

mV

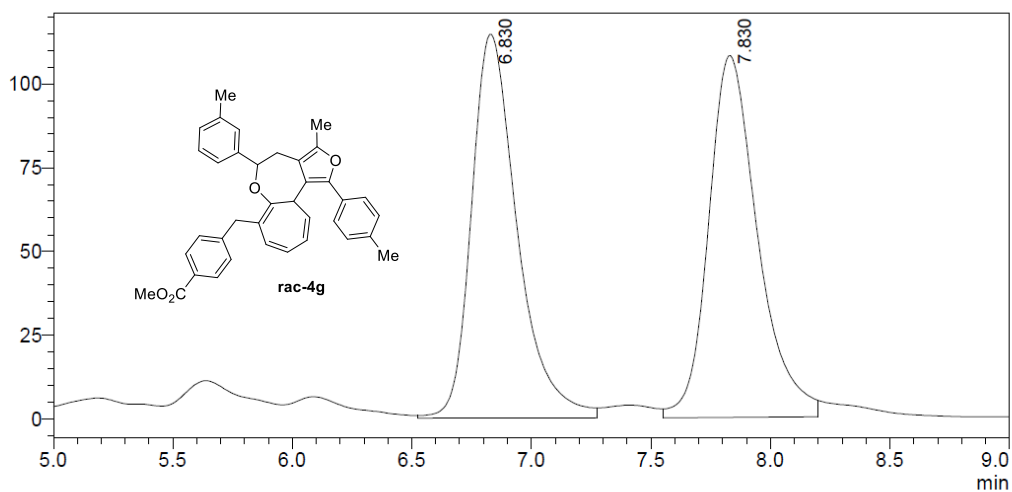

<Peak Table>

| Peak# | Ret. Time | Area    | Height | Area%   |
|-------|-----------|---------|--------|---------|
| 1     | 6.830     | 1526190 | 114426 | 49.687  |
| 2     | 7.830     | 1545423 | 107922 | 50.313  |
|       |           | 3071613 | 222348 | 100.000 |

<Chromatogram>

mV

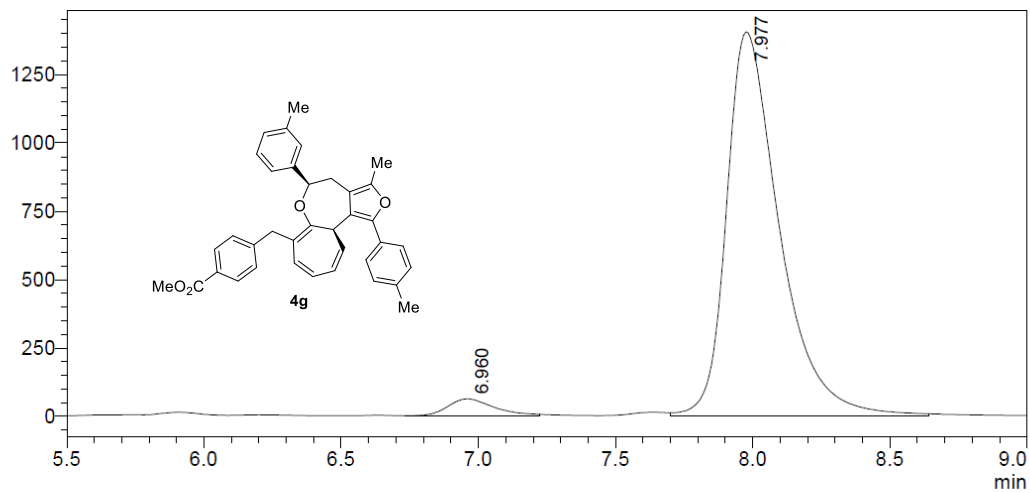

<Peak Table>

| Peak# | Ret. Time | Area     | Height  | Area%   |
|-------|-----------|----------|---------|---------|
| 1     | 6.960     | 778989   | 63680   | 3.952   |
| 2     | 7.977     | 18930406 | 1406294 | 96.048  |
|       |           | 19709395 | 1469974 | 100.000 |

<Chromatogram>

mV

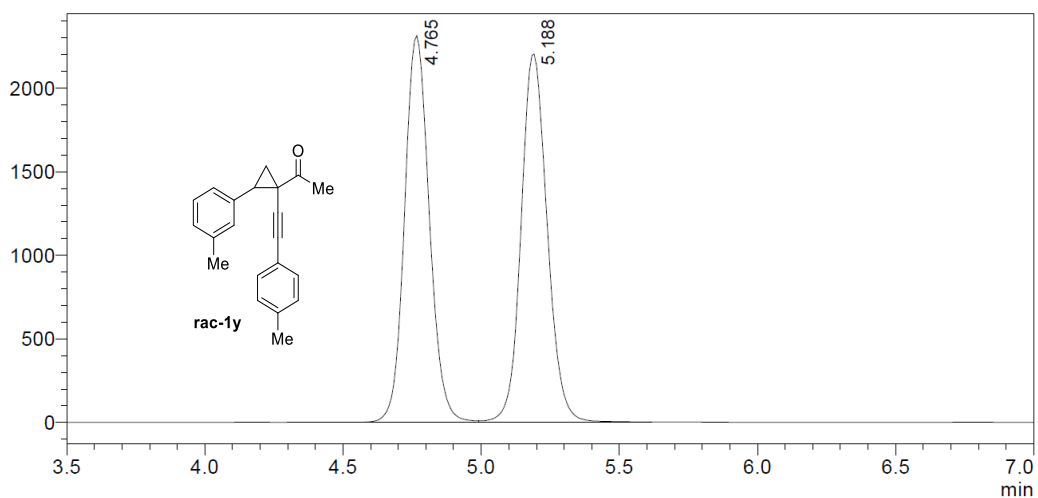

<Peak Table>

| Peak# | Ret. Time | Area     | Height  | Area%   |
|-------|-----------|----------|---------|---------|
| 1     | 4.765     | 14476586 | 2315616 | 49.798  |
| 2     | 5.188     | 14594217 | 2205568 | 50.202  |
|       |           | 29070803 | 4521184 | 100.000 |

<Chromatogram>

mV

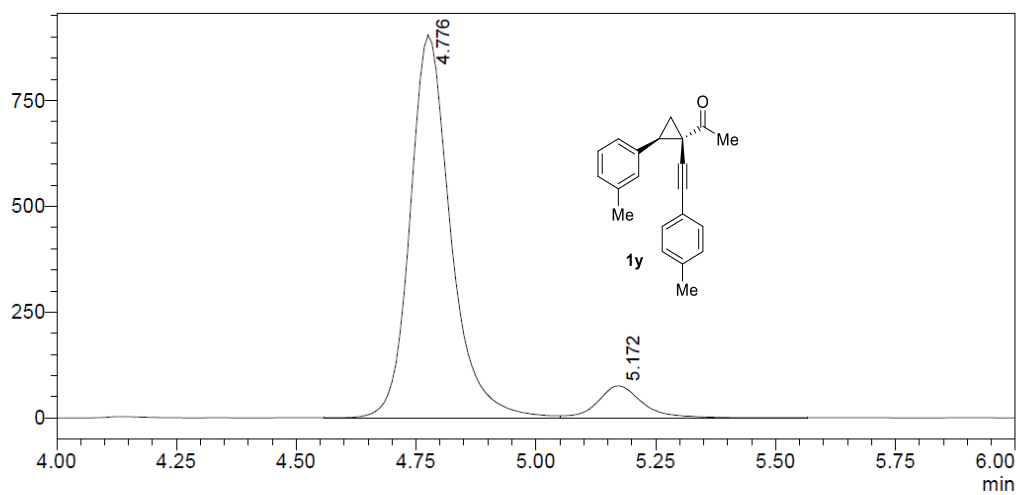

<Peak Table>

| Peak# | Ret. Time | Area    | Height | Area%   |
|-------|-----------|---------|--------|---------|
| 1     | 4.776     | 5344563 | 905537 | 91.354  |
| 2     | 5.172     | 505830  | 76102  | 8.646   |
|       |           | 5850393 | 981639 | 100.000 |

<Chromatogram>

mV

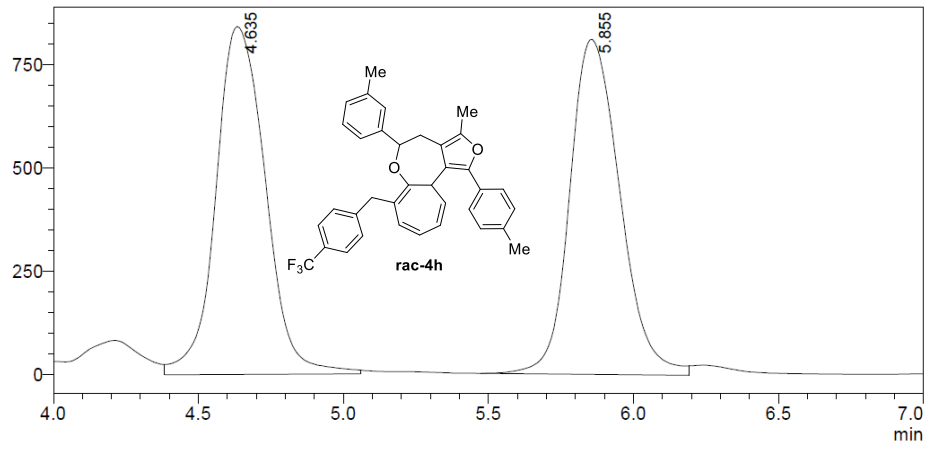

<Peak Table>

| Peak# | Ret. Time | Area     | Height  | Area%   |
|-------|-----------|----------|---------|---------|
| 1     | 4.635     | 10036360 | 841826  | 50.675  |
| 2     | 5.855     | 9768993  | 810102  | 49.325  |
|       |           | 19805353 | 1651928 | 100.000 |

<Chromatogram>

mV

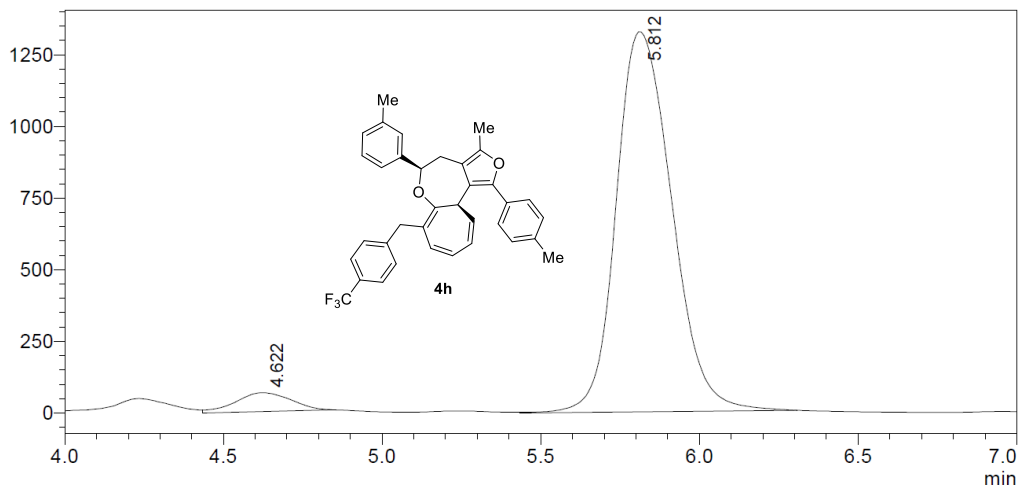

<Peak Table>

| Peak# | Ret. Time | Area     | Height  | Area%   |
|-------|-----------|----------|---------|---------|
| 1     | 4.622     | 808515   | 66142   | 4.758   |
| 2     | 5.812     | 16185716 | 1326549 | 95.242  |
|       |           | 16994231 | 1392691 | 100.000 |

<Chromatogram>

mV

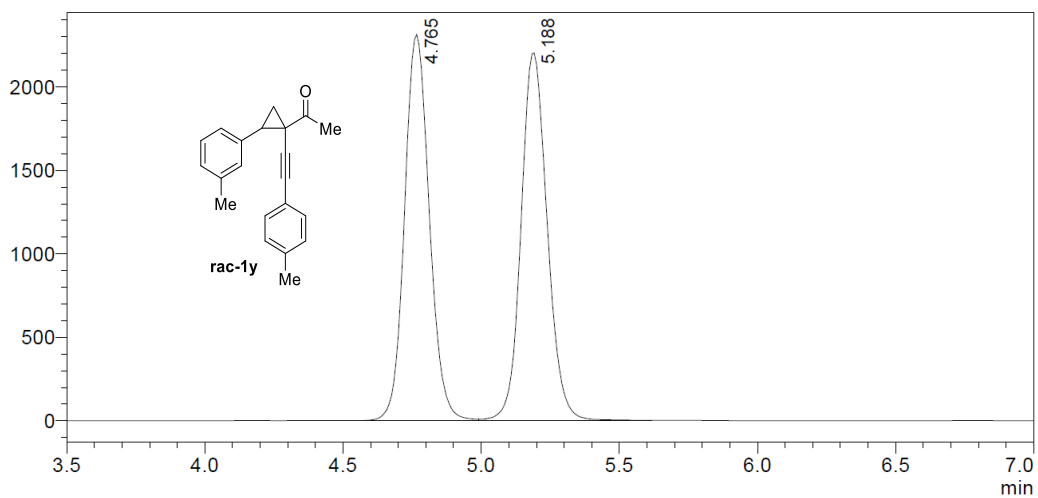

<Peak Table>

| Peak# | Ret. Time | Area     | Height  | Area%   |
|-------|-----------|----------|---------|---------|
| 1     | 4.765     | 14476586 | 2315616 | 49.798  |
| 2     | 5.188     | 14594217 | 2205568 | 50.202  |
|       |           | 29070803 | 4521184 | 100.000 |

<Chromatogram>

mV

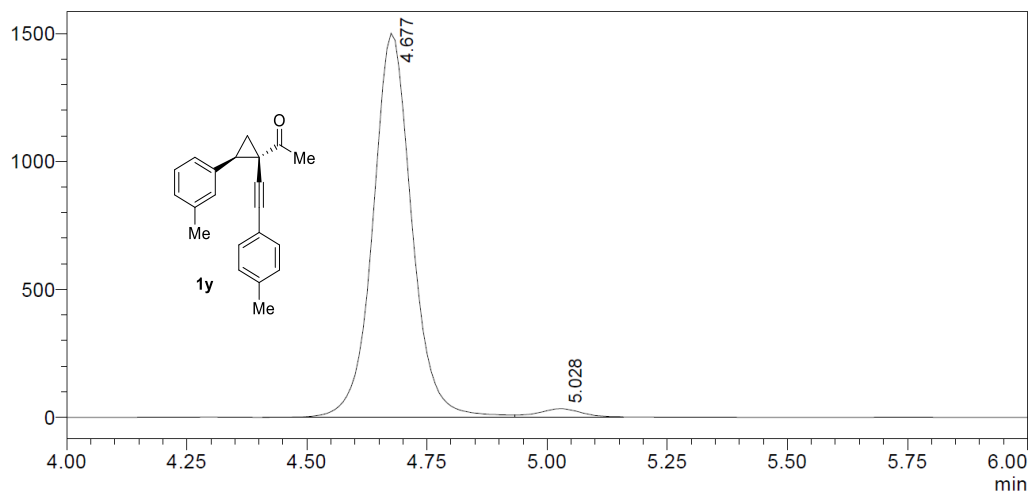

<Peak Table>

| Peak# | Ret. Time | Area    | Height  | Area%   |
|-------|-----------|---------|---------|---------|
| 1     | 4.677     | 8478584 | 1501854 | 97.373  |
| 2     | 5.028     | 228723  | 34882   | 2.627   |
|       |           | 8707308 | 1536736 | 100.000 |

<Chromatogram>

mV

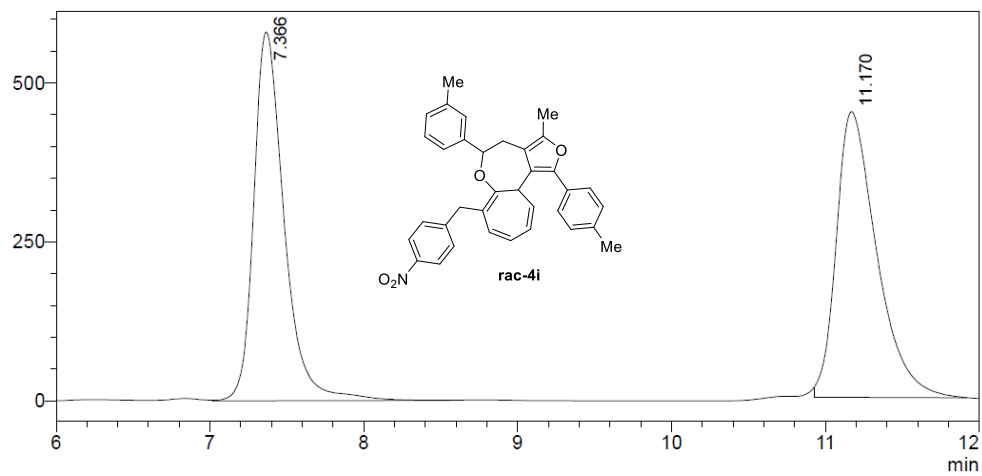

<Peak Table>

| Peak# | Ret. Time | Area     | Height  | Area%   |
|-------|-----------|----------|---------|---------|
| 1     | 7.366     | 7998600  | 580157  | 49.332  |
| 2     | 11.170    | 8215331  | 449275  | 50.668  |
|       |           | 16213932 | 1029432 | 100.000 |

<Chromatogram>

mV

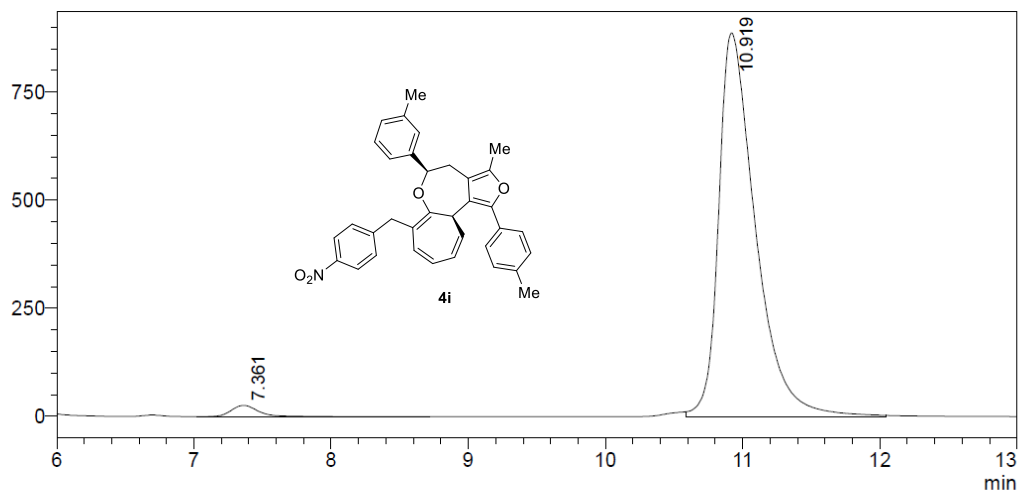

<Peak Table>

| Peak# | Ret. Time | Area     | Height | Area%   |
|-------|-----------|----------|--------|---------|
| 1     | 7.361     | 382060   | 26184  | 2.251   |
| 2     | 10.919    | 16588560 | 886897 | 97.749  |
|       |           | 16970620 | 913081 | 100.000 |

<Chromatogram>

mV

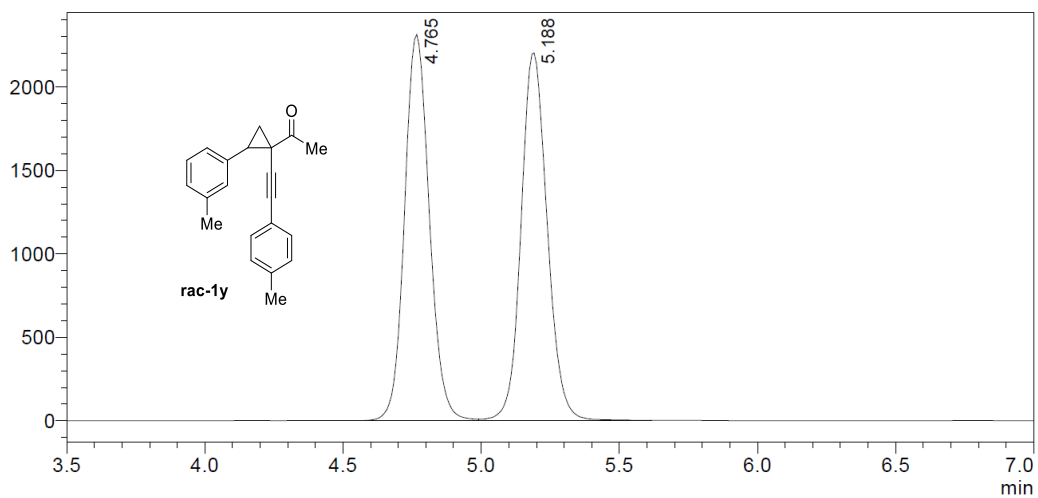

<Peak Table>

| Peak# | Ret. Time | Area     | Height  | Area%   |
|-------|-----------|----------|---------|---------|
| 1     | 4.765     | 14476586 | 2315616 | 49.798  |
| 2     | 5.188     | 14594217 | 2205568 | 50.202  |
|       |           | 29070803 | 4521184 | 100.000 |

<Chromatogram>

mV

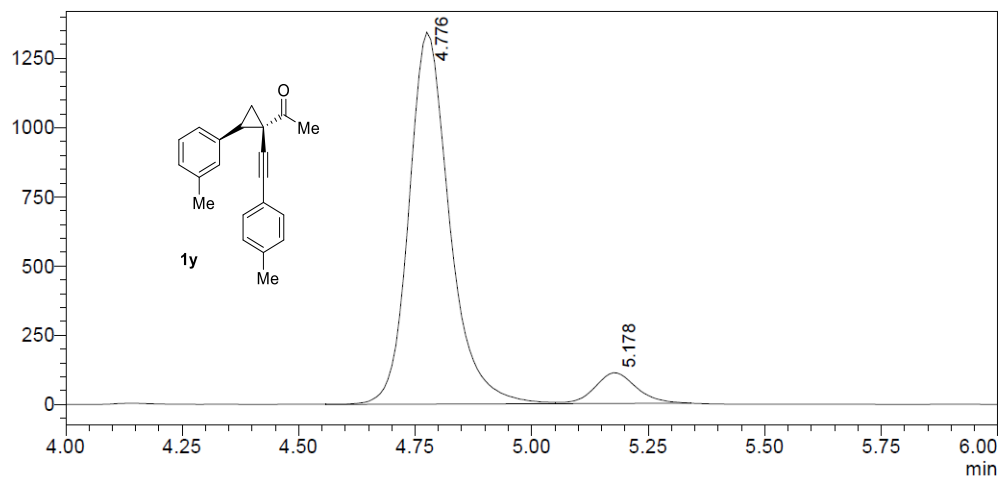

<Peak Table>

| Peak# | Ret. Time | Area    | Height  | Area%   |
|-------|-----------|---------|---------|---------|
| 1     | 4.776     | 8162941 | 1343918 | 92.221  |
| 2     | 5.178     | 688585  | 110721  | 7.779   |
|       |           | 8851526 | 1454639 | 100.000 |

<Chromatogram>

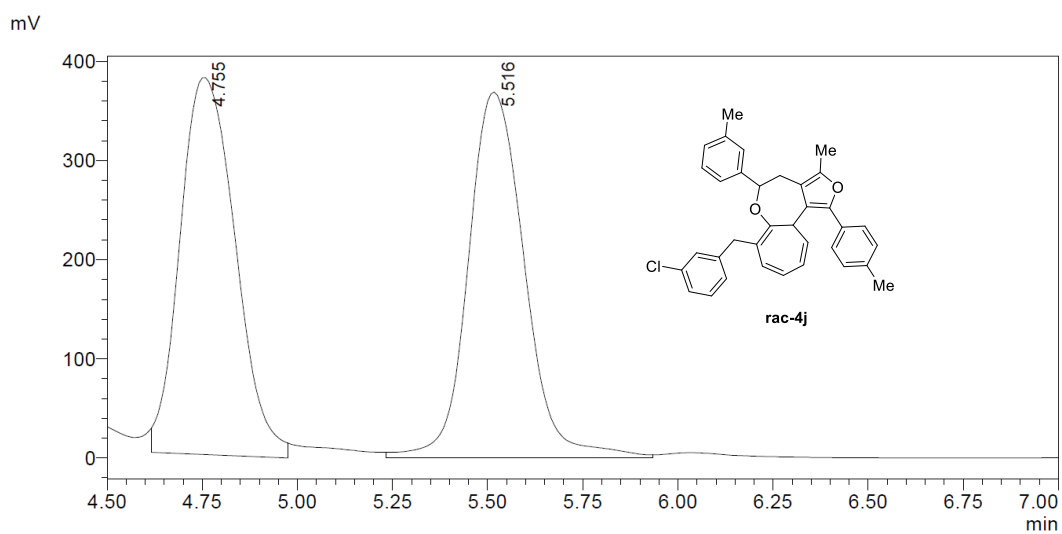

<Peak Table>

| Peak# | Ret. Time | Area    | Height | Area%   |
|-------|-----------|---------|--------|---------|
| 1     | 4.755     | 3837640 | 380328 | 50.138  |
| 2     | 5.516     | 3816576 | 369165 | 49.862  |
|       |           | 7654216 | 749493 | 100.000 |

<Chromatogram>

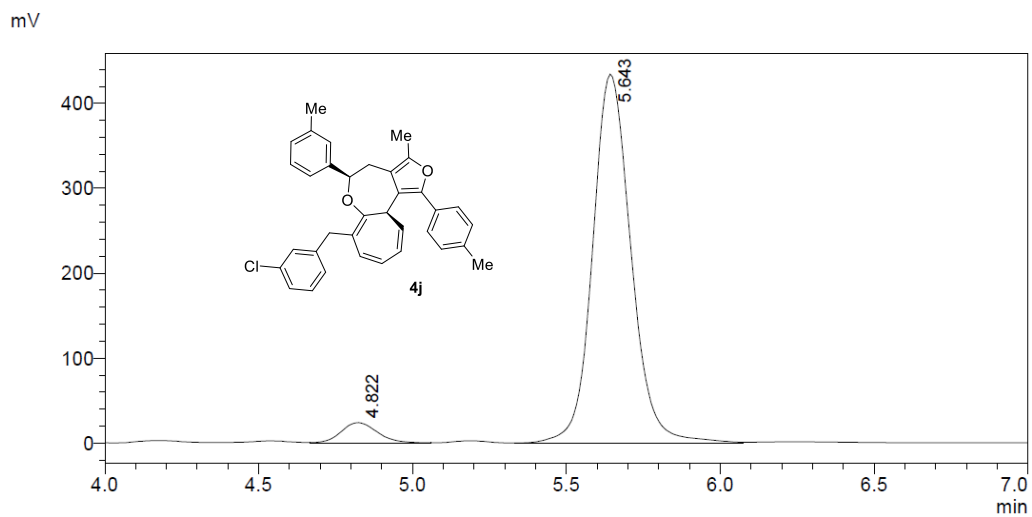

<Peak Table>

| Peak# | Ret. Time | Area    | Height | Area%   |
|-------|-----------|---------|--------|---------|
| 1     | 4.822     | 205301  | 24301  | 5.145   |
| 2     | 5.643     | 3785283 | 434929 | 94.855  |
|       |           | 3990585 | 459230 | 100.000 |

<Chromatogram>

mV

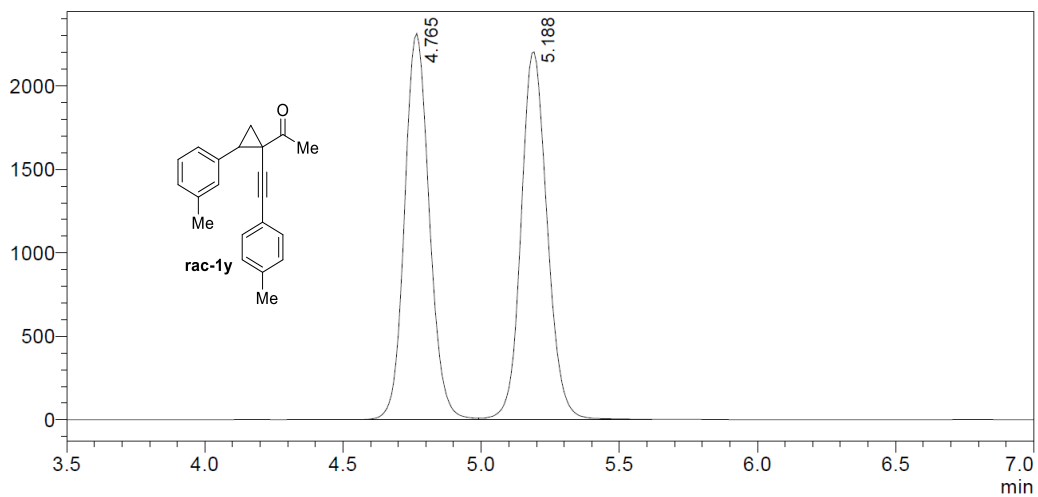

<Peak Table>

| Peak# | Ret. Time | Area     | Height  | Area%   |
|-------|-----------|----------|---------|---------|
| 1     | 4.765     | 14476586 | 2315616 | 49.798  |
| 2     | 5.188     | 14594217 | 2205568 | 50.202  |
|       |           | 29070803 | 4521184 | 100.000 |

<Chromatogram>

mV

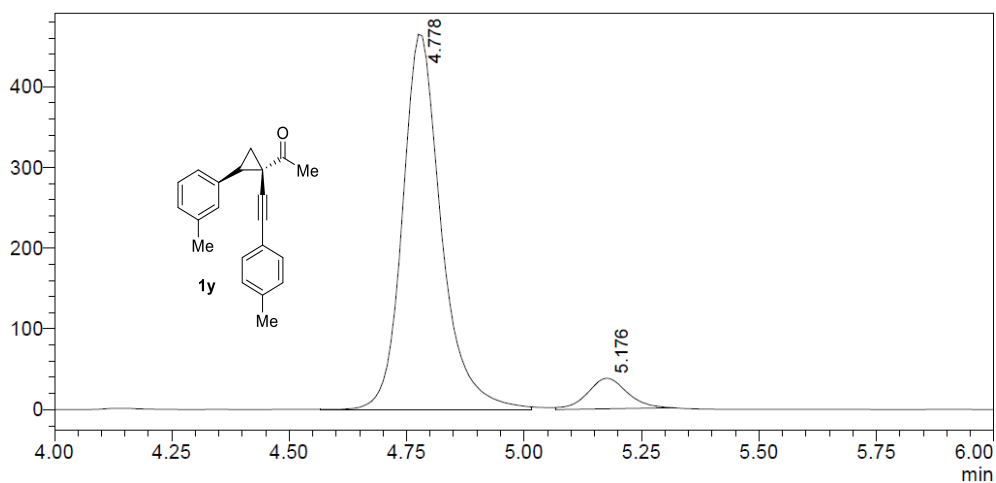

<Peak Table>

| Peak# | Ret. Time | Area    | Height | Area%   |
|-------|-----------|---------|--------|---------|
| 1     | 4.778     | 2681804 | 465063 | 92.283  |
| 2     | 5.176     | 224268  | 38096  | 7.717   |
|       |           | 2906072 | 503159 | 100.000 |



<Chromatogram>

mV

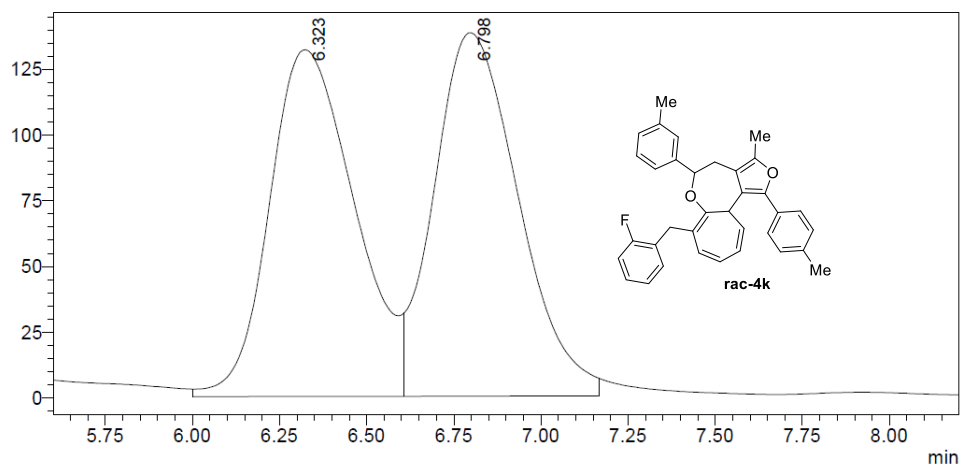

<Peak Table>

| Peak# | Ret. Time | Area    | Height | Area%   |
|-------|-----------|---------|--------|---------|
| 1     | 6.323     | 2248715 | 131828 | 49.290  |
| 2     | 6.798     | 2313542 | 138155 | 50.710  |
|       |           | 4562258 | 269984 | 100.000 |

<Chromatogram>

mV

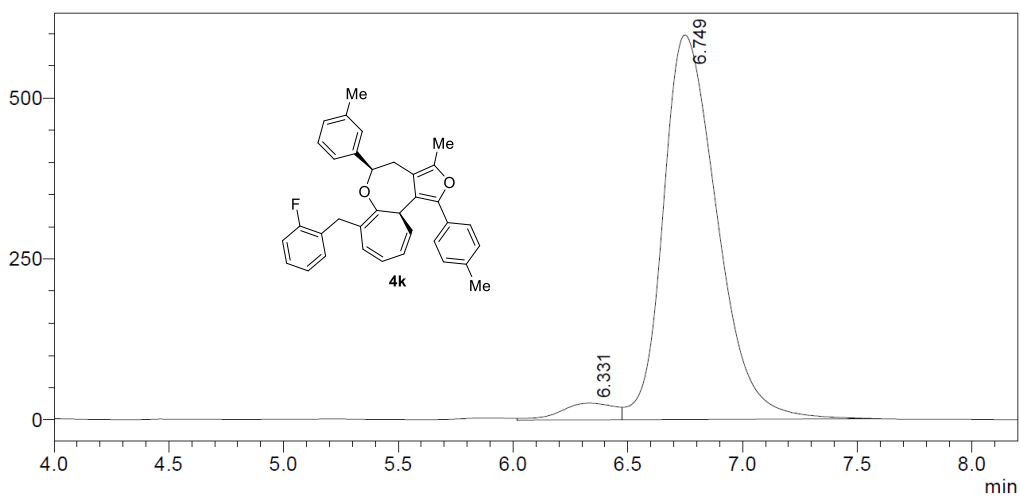

<Peak Table>

| Peak# | Ret. Time | Area     | Height | Area%   |
|-------|-----------|----------|--------|---------|
| 1     | 6.331     | 424407   | 25882  | 4.169   |
| 2     | 6.749     | 9756231  | 597375 | 95.831  |
|       |           | 10180638 | 623257 | 100.000 |

<Chromatogram>

mV

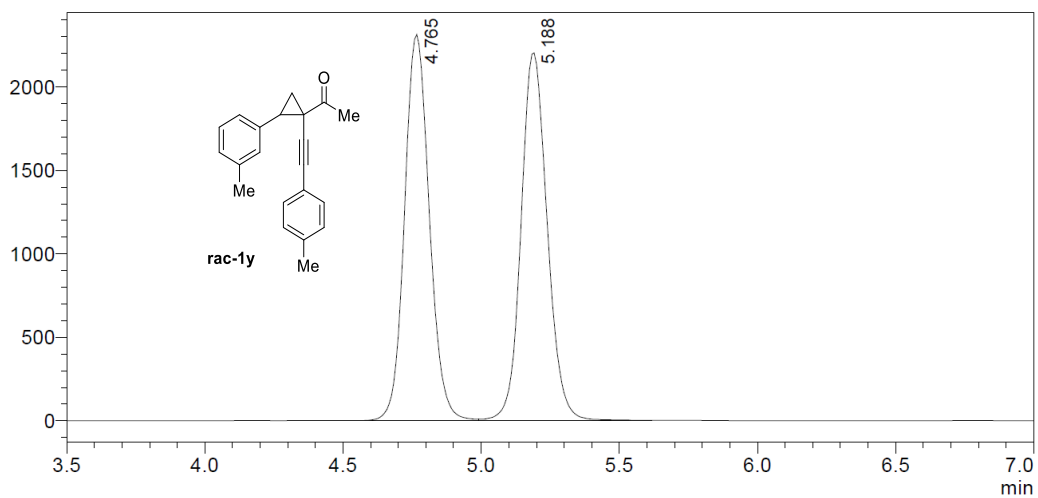

<Peak Table>

| Peak# | Ret. Time | Area     | Height  | Area%   |
|-------|-----------|----------|---------|---------|
| 1     | 4.765     | 14476586 | 2315616 | 49.798  |
| 2     | 5.188     | 14594217 | 2205568 | 50.202  |
|       |           | 29070803 | 4521184 | 100.000 |

<Chromatogram>

mV

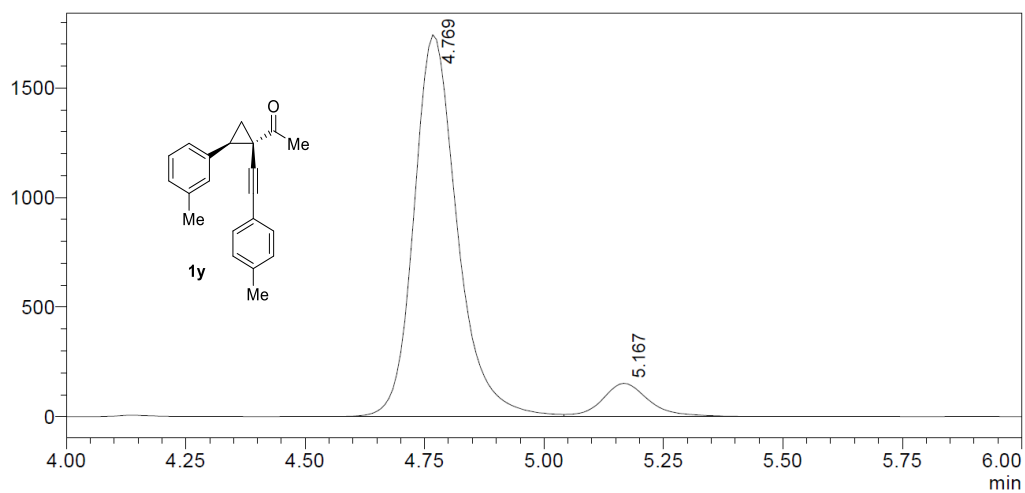

<Peak Table>

| Peak# | Ret. Time | Area     | Height  | Area%   |
|-------|-----------|----------|---------|---------|
| 1     | 4.769     | 11022498 | 1743172 | 91.247  |
| 2     | 5.167     | 1057399  | 152888  | 8.753   |
|       |           | 12079897 | 1896061 | 100.000 |

<Chromatogram>

mV

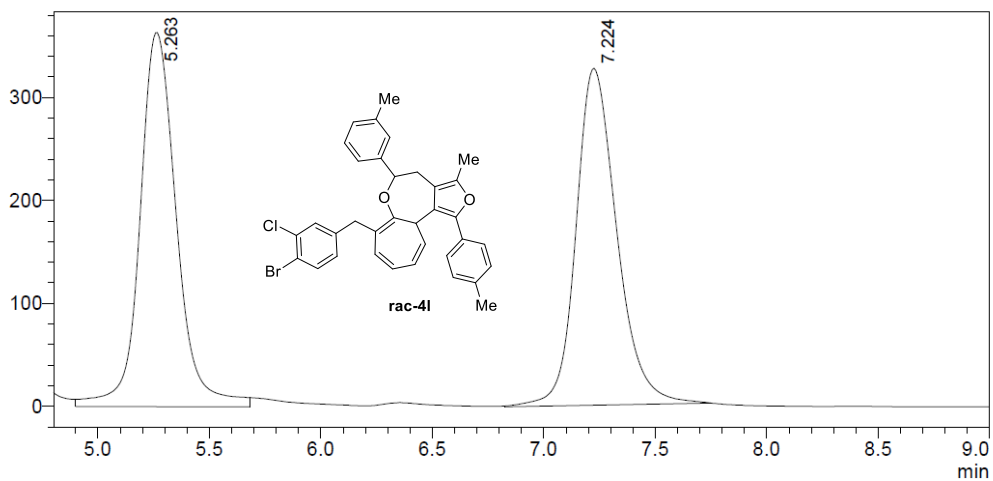

<Peak Table>

| Peak# | Ret. Time | Area    | Height | Area%   |
|-------|-----------|---------|--------|---------|
| 1     | 5.263     | 4151806 | 363499 | 49.900  |
| 2     | 7.224     | 4168402 | 327244 | 50.100  |
|       |           | 8320208 | 690743 | 100.000 |

<Chromatogram>

mV

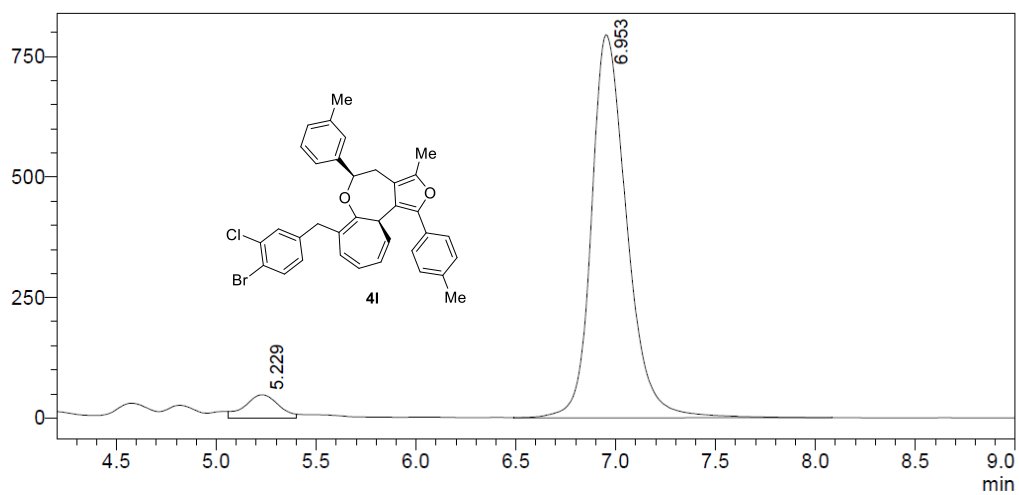

<Peak Table>

| Peak# | Ret. Time | Area     | Height | Area%   |
|-------|-----------|----------|--------|---------|
| 1     | 5.229     | 568124   | 48421  | 5.474   |
| 2     | 6.953     | 9810810  | 795060 | 94.526  |
|       |           | 10378933 | 843480 | 100.000 |

<Chromatogram>

mV

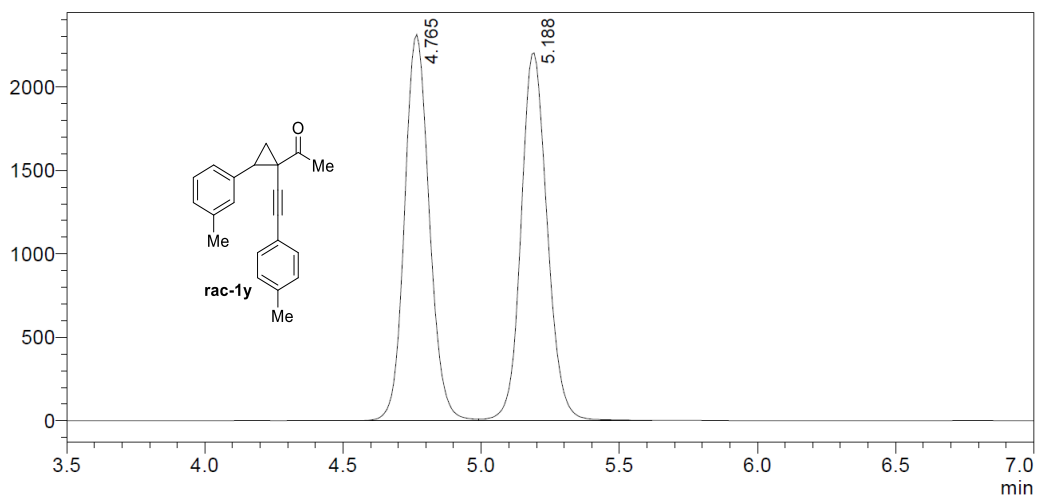

<Peak Table>

| Peak# | Ret. Time | Area     | Height  | Area%   |
|-------|-----------|----------|---------|---------|
| 1     | 4.765     | 14476586 | 2315616 | 49.798  |
| 2     | 5.188     | 14594217 | 2205568 | 50.202  |
|       |           | 29070803 | 4521184 | 100.000 |

<Chromatogram>

mV

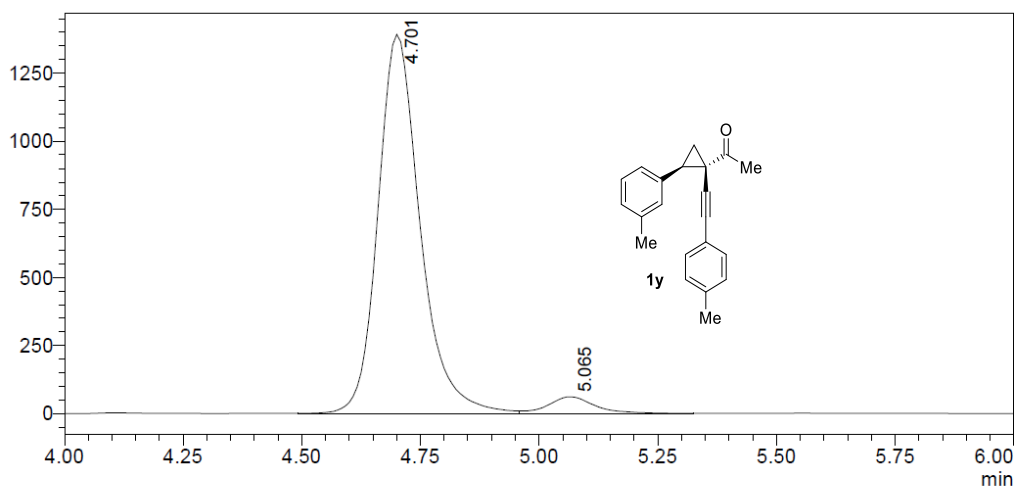

<Peak Table>

| Peak# | Ret. Time | Area    | Height  | Area%   |
|-------|-----------|---------|---------|---------|
| 1     | 4.701     | 8616185 | 1392111 | 95.268  |
| 2     | 5.065     | 427991  | 61734   | 4.732   |
|       |           | 9044177 | 1453845 | 100.000 |

<Chromatogram>

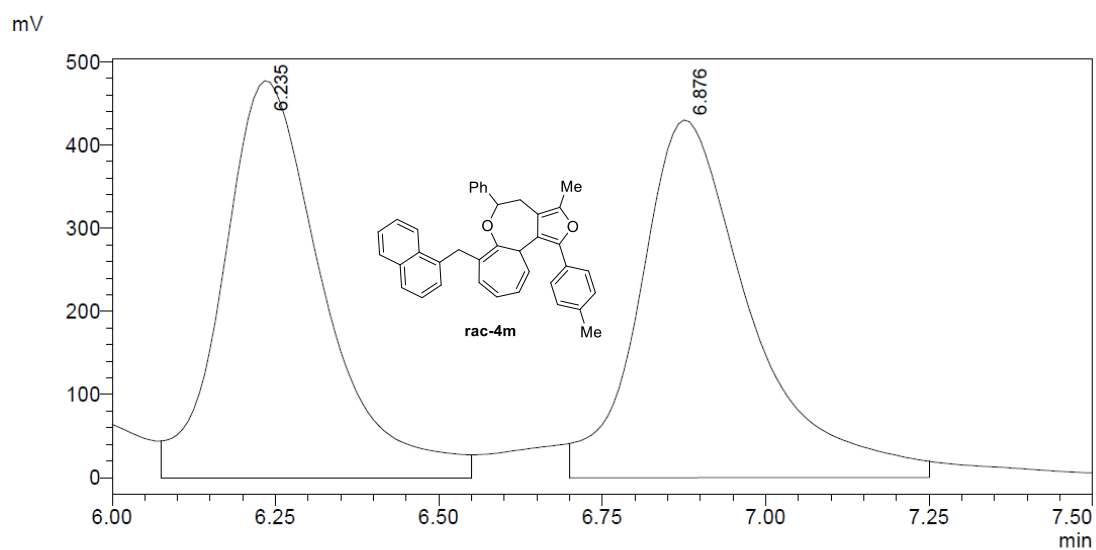

<Peak Table>

| Peak# | Ret. Time | Area     | Height | Area%   |
|-------|-----------|----------|--------|---------|
| 1     | 6.235     | 5061596  | 477096 | 49.878  |
| 2     | 6.876     | 5086361  | 429699 | 50.122  |
|       |           | 10147957 | 906796 | 100.000 |

<Chromatogram>

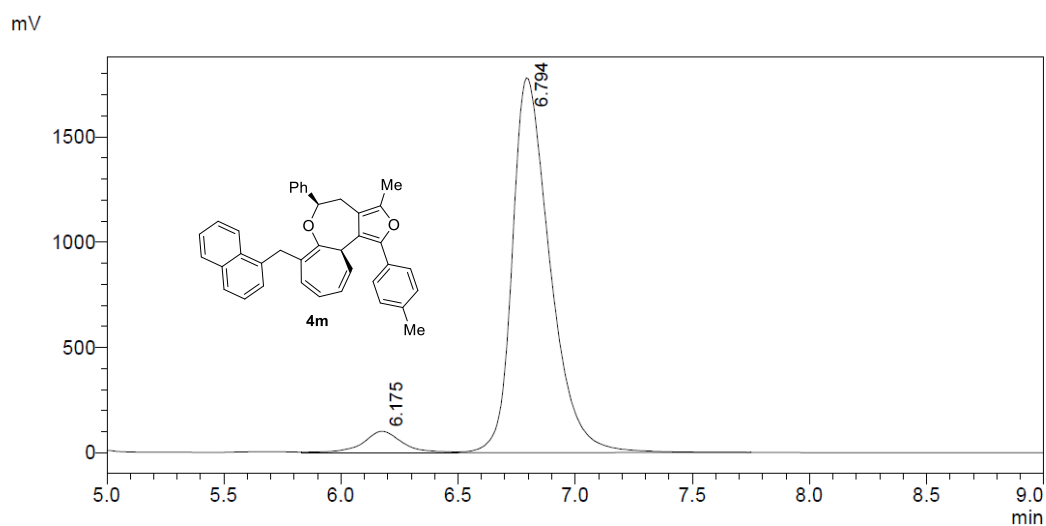

<Peak Table>

| Peak# | Ret. Time | Area     | Height  | Area%   |
|-------|-----------|----------|---------|---------|
| 1     | 6.175     | 1207652  | 101800  | 5.717   |
| 2     | 6.794     | 19916671 | 1779586 | 94.283  |
|       |           | 21124322 | 1881385 | 100.000 |

<Chromatogram>

mV

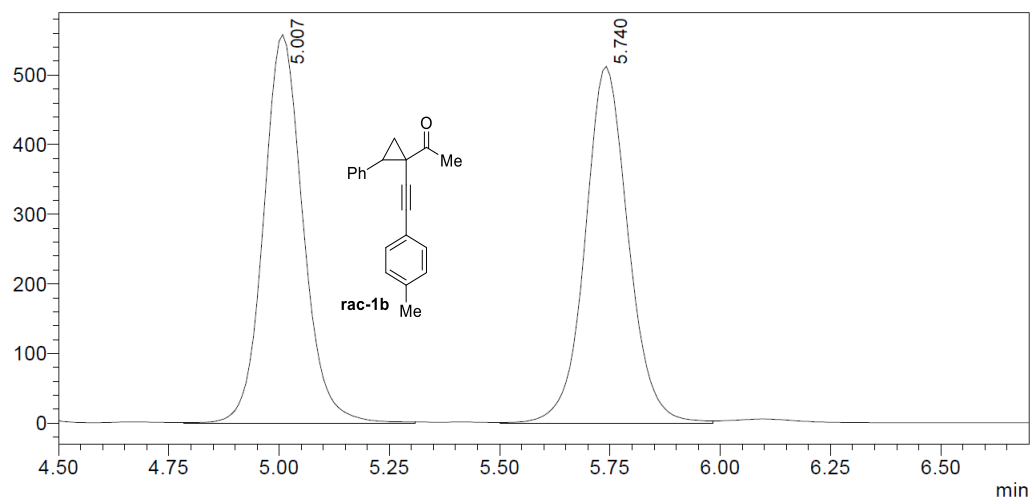

<Peak Table>

| Peak# | Ret. Time | Area    | Height  | Area%   |
|-------|-----------|---------|---------|---------|
| 1     | 5.007     | 3475061 | 558151  | 49.858  |
| 2     | 5.740     | 3494896 | 512551  | 50.142  |
|       |           | 6969958 | 1070702 | 100.000 |

<Chromatogram>

mV

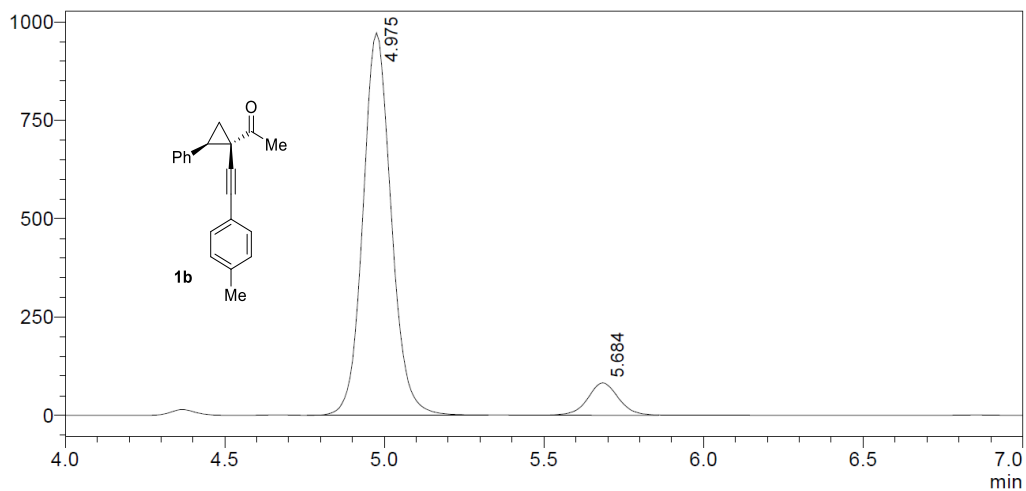

<Peak Table>

| Peak# | Ret. Time | Area    | Height  | Area%   |
|-------|-----------|---------|---------|---------|
| 1     | 4.975     | 6007993 | 972690  | 91.604  |
| 2     | 5.684     | 550655  | 82285   | 8.396   |
|       |           | 6558648 | 1054975 | 100.000 |

<Chromatogram>

mV

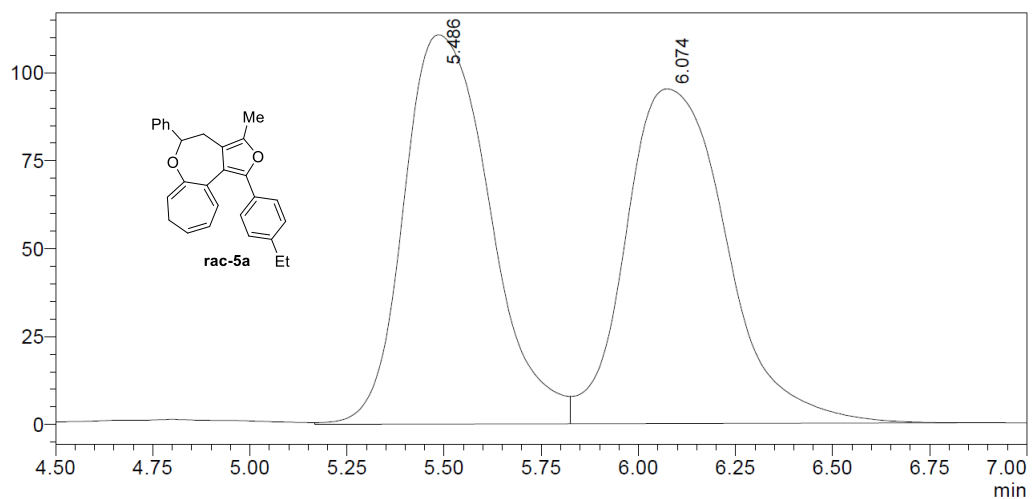

<Peak Table>

| Peak# | Ret. Time | Area    | Height | Area%   |
|-------|-----------|---------|--------|---------|
| 1     | 5.486     | 1708937 | 110722 | 49.812  |
| 2     | 6.074     | 1721832 | 95165  | 50.188  |
|       |           | 3430769 | 205887 | 100.000 |

<Chromatogram>

mV

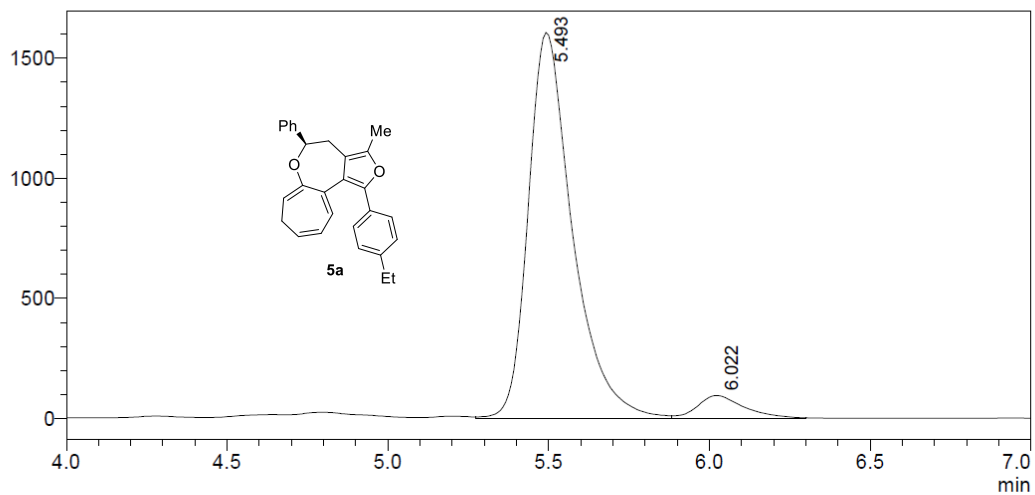

<Peak Table>

| Peak# | Ret. Time | Area     | Height  | Area%   |
|-------|-----------|----------|---------|---------|
| 1     | 5.493     | 15400540 | 1606381 | 94.121  |
| 2     | 6.022     | 961945   | 95186   | 5.879   |
|       |           | 16362485 | 1701567 | 100.000 |

<Chromatogram>

mV

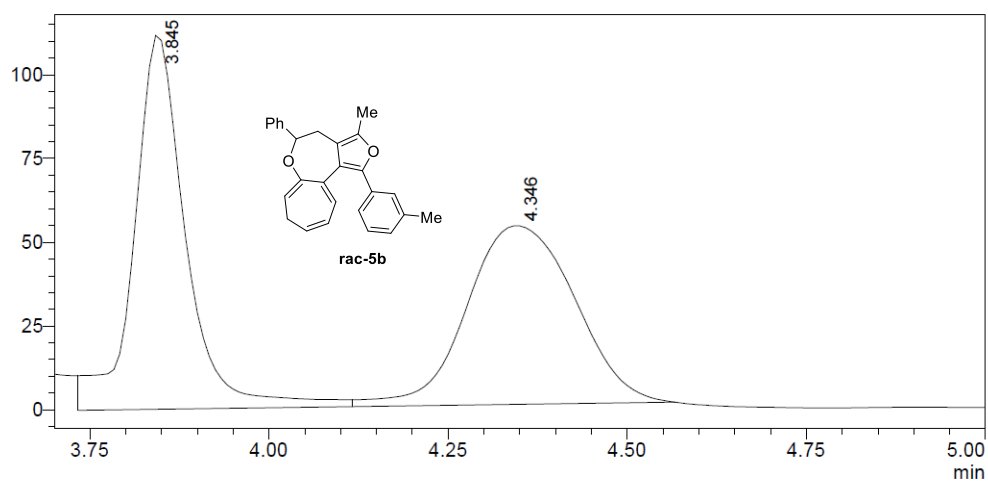

<Peak Table>

| Peak# | Ret. Time | Area    | Height | Area%   |
|-------|-----------|---------|--------|---------|
| 1     | 3.845     | 560911  | 111590 | 49.985  |
| 2     | 4.346     | 561254  | 53300  | 50.015  |
|       |           | 1122165 | 164889 | 100.000 |

<Chromatogram>

mV

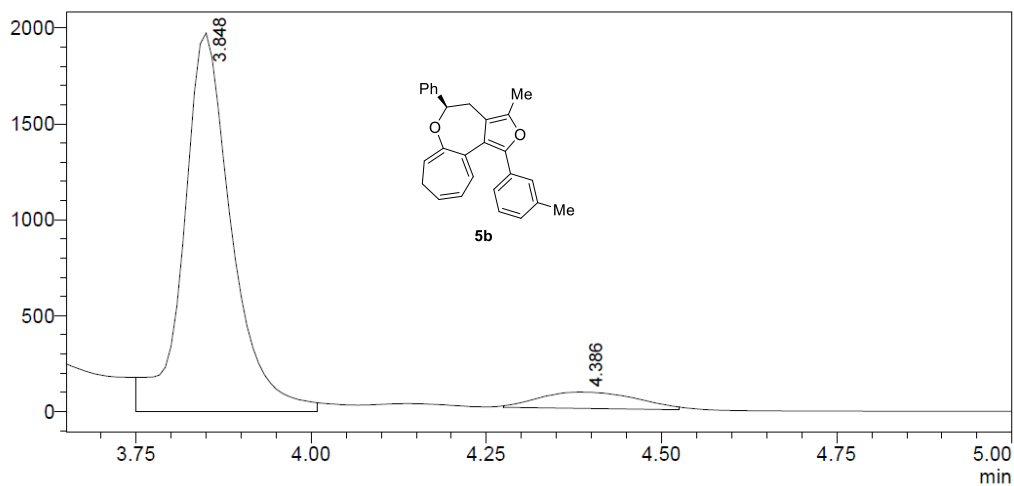

<Peak Table>

| Peak# | Ret. Time | Area     | Height  | Area%   |
|-------|-----------|----------|---------|---------|
| 1     | 3.848     | 9334545  | 1973981 | 91.959  |
| 2     | 4.386     | 816231   | 84538   | 8.041   |
|       |           | 10150776 | 2058519 | 100.000 |



<Chromatogram>

mV

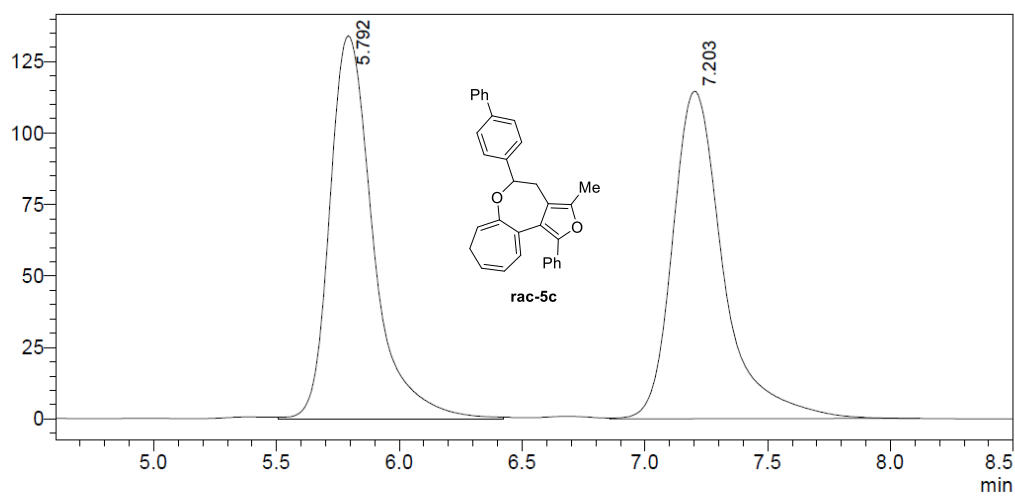

<Peak Table>

| Peak# | Ret. Time | Area    | Height | Area%   |
|-------|-----------|---------|--------|---------|
| 1     | 5.792     | 1653049 | 134091 | 50.000  |
| 2     | 7.203     | 1653072 | 114620 | 50.000  |
|       |           | 3306121 | 248711 | 100.000 |

<Chromatogram>

mV

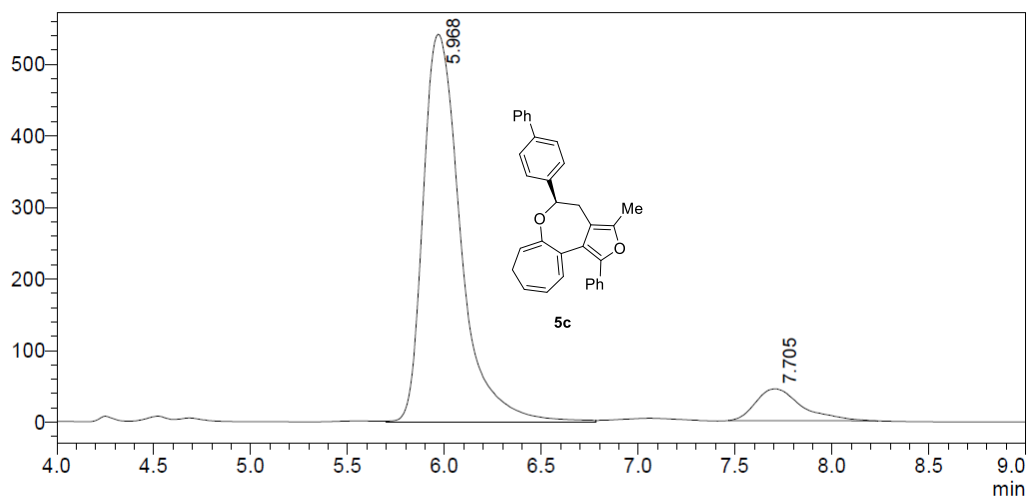

<Peak Table>

| Peak# | Ret. Time | Area    | Height | Area%   |
|-------|-----------|---------|--------|---------|
| 1     | 5.968     | 7302706 | 541864 | 90.911  |
| 2     | 7.705     | 730096  | 44319  | 9.089   |
|       |           | 8032803 | 586183 | 100.000 |

<Chromatogram>

mV

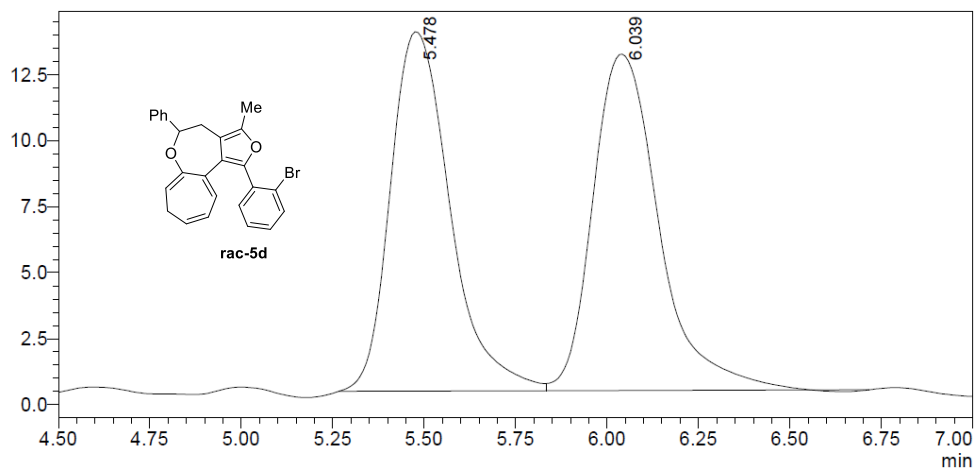

<Peak Table>

| Peak# | Ret. Time | Area   | Height | Area%   |
|-------|-----------|--------|--------|---------|
| 1     | 5.478     | 154930 | 13616  | 49.156  |
| 2     | 6.039     | 160248 | 12747  | 50.844  |
|       |           | 315177 | 26363  | 100.000 |

<Chromatogram>

mV

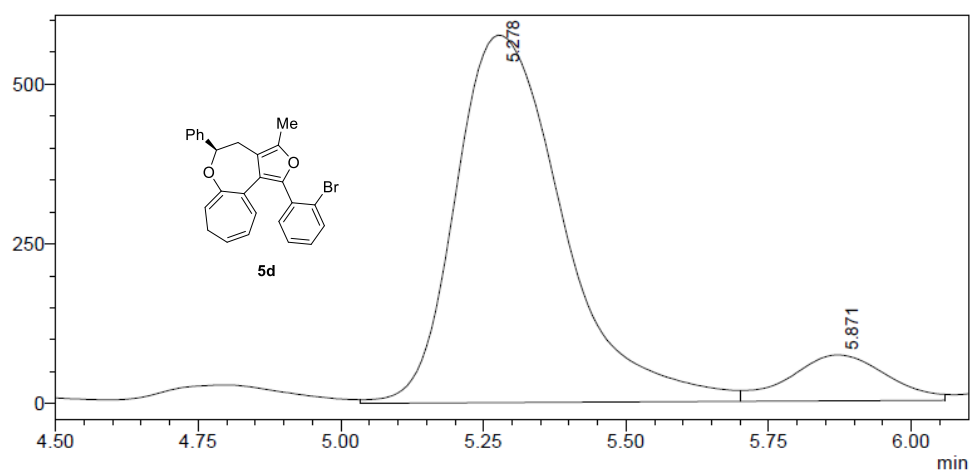

<Peak Table>

| Peak# | Ret. Time | Area    | Height | Area%   |
|-------|-----------|---------|--------|---------|
| 1     | 5.278     | 7542524 | 574813 | 89.906  |
| 2     | 5.871     | 846805  | 71735  | 10.094  |
|       |           | 8389329 | 646548 | 100.000 |

<Chromatogram>

mV

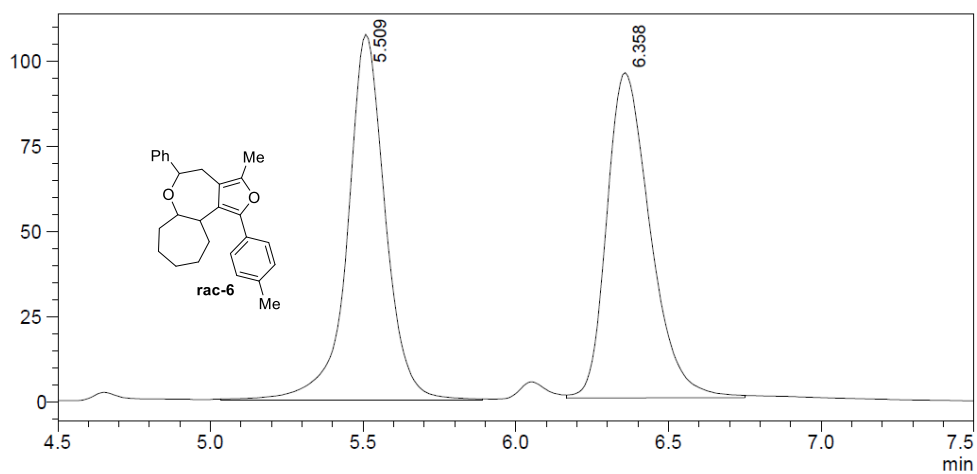

<Peak Table>

| Peak# | Ret. Time | Area    | Height | Area%   |
|-------|-----------|---------|--------|---------|
| 1     | 5.509     | 927979  | 107446 | 49.545  |
| 2     | 6.358     | 945025  | 95512  | 50.455  |
|       |           | 1873004 | 202958 | 100.000 |

<Chromatogram>

mV

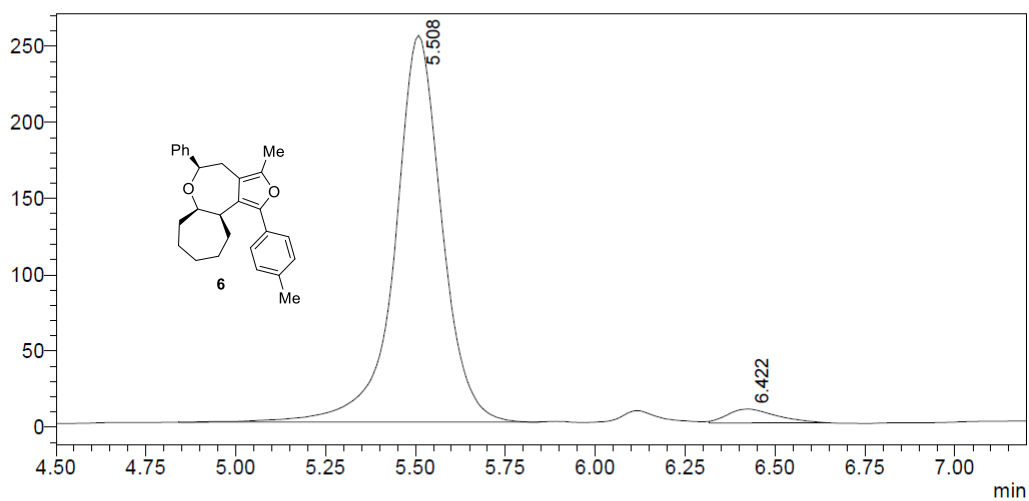

<Peak Table>

| Peak# | Ret. Time | Area    | Height | Area%   |
|-------|-----------|---------|--------|---------|
| 1     | 5.508     | 2291169 | 253799 | 95.384  |
| 2     | 6.422     | 110878  | 9165   | 4.616   |
|       |           | 2402047 | 262964 | 100.000 |

<Chromatogram>

mV

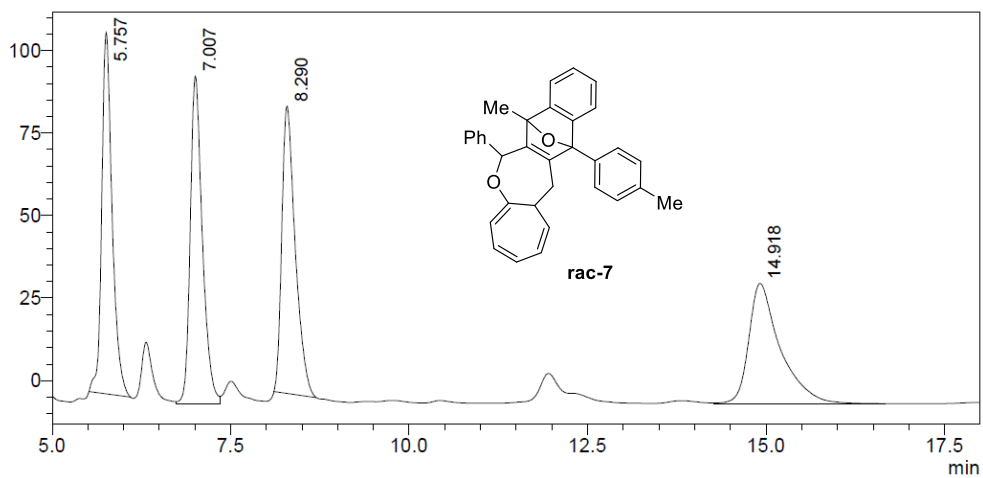

<Peak Table>

| Peak# | Ret. Time | Area    | Height | Area%   |
|-------|-----------|---------|--------|---------|
| 1     | 5.757     | 1110242 | 109398 | 24.498  |
| 2     | 7.007     | 1172634 | 99184  | 25.875  |
| 3     | 8.290     | 1135739 | 86988  | 25.061  |
| 4     | 14.918    | 1113348 | 36406  | 24.567  |
|       |           | 4531963 | 331976 | 100.000 |

<Chromatogram>

mV

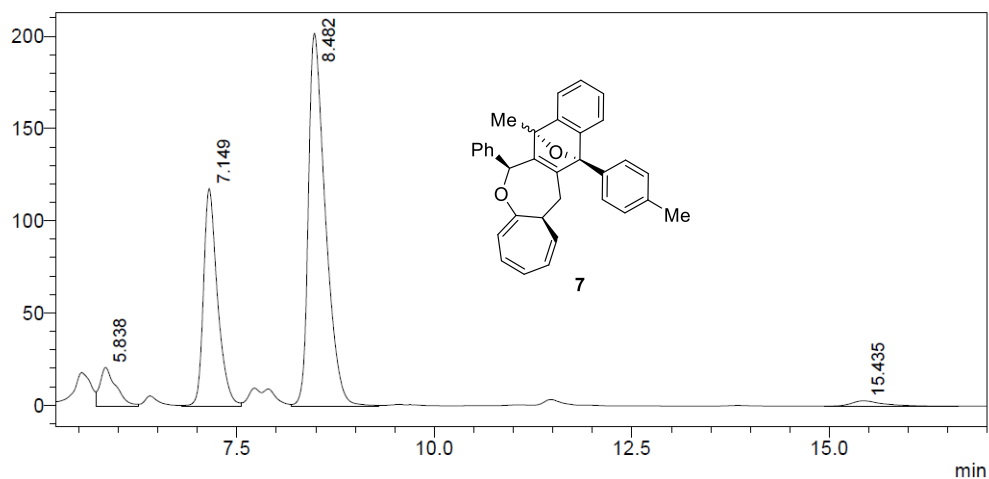

<Peak Table>

| Peak# | Ret. Time | Area    | Height | Area%   |
|-------|-----------|---------|--------|---------|
| 1     | 5.838     | 291288  | 20984  | 5.996   |
| 2     | 7.149     | 1455970 | 117880 | 29.968  |
| 3     | 8.482     | 3029972 | 202053 | 62.365  |
| 4     | 15.435    | 81204   | 2911   | 1.671   |
|       |           | 4858433 | 343827 | 100.000 |

<Chromatogram>

mV

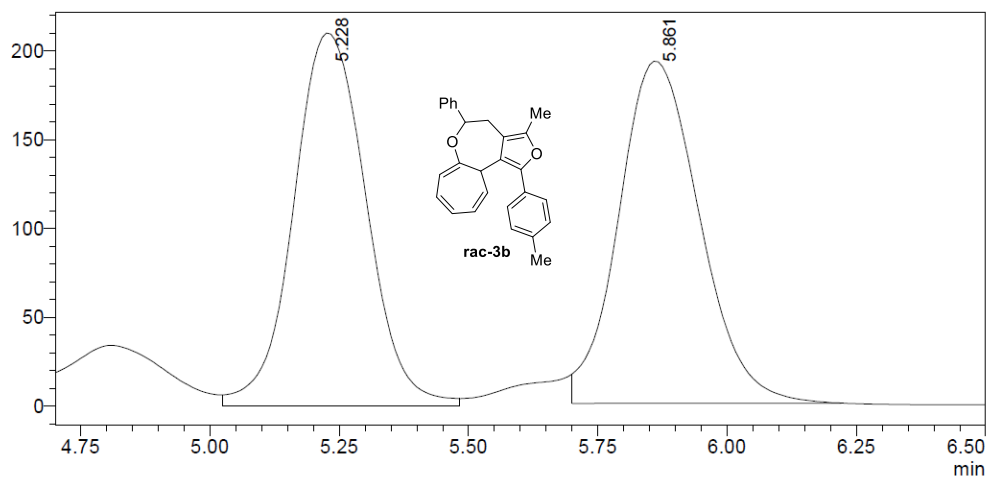

<Peak Table>

| Peak# | Ret. Time | Area    | Height | Area%   |
|-------|-----------|---------|--------|---------|
| 1     | 5.228     | 2055520 | 210033 | 49.482  |
| 2     | 5.861     | 2098532 | 192624 | 50.518  |
|       |           | 4154052 | 402658 | 100.000 |

<Chromatogram>

mV

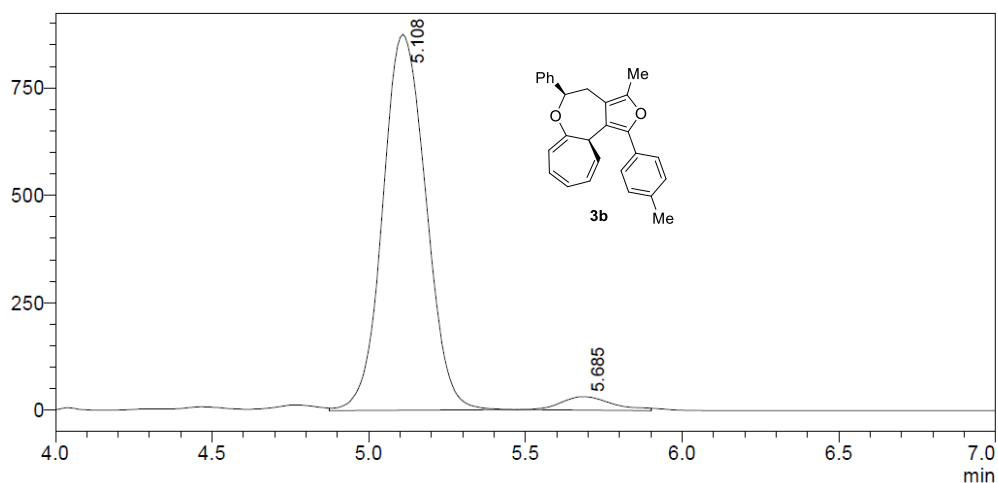

<Peak Table>

| Peak# | Ret. Time | Area    | Height | Area%   |
|-------|-----------|---------|--------|---------|
| 1     | 5.108     | 8376088 | 873891 | 95.947  |
| 2     | 5.685     | 353803  | 31190  | 4.053   |
|       |           | 8729891 | 905082 | 100.000 |

<Chromatogram>

mV

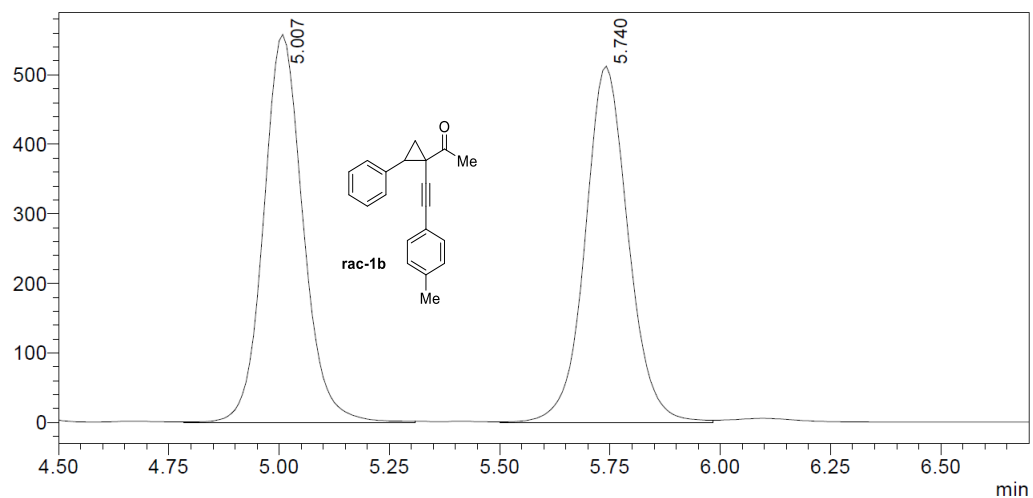

<Peak Table>

| Peak# | Ret. Time | Area    | Height  | Area%   |
|-------|-----------|---------|---------|---------|
| 1     | 5.007     | 3475061 | 558151  | 49.858  |
| 2     | 5.740     | 3494896 | 512551  | 50.142  |
|       |           | 6969958 | 1070702 | 100.000 |

<Chromatogram>

mV

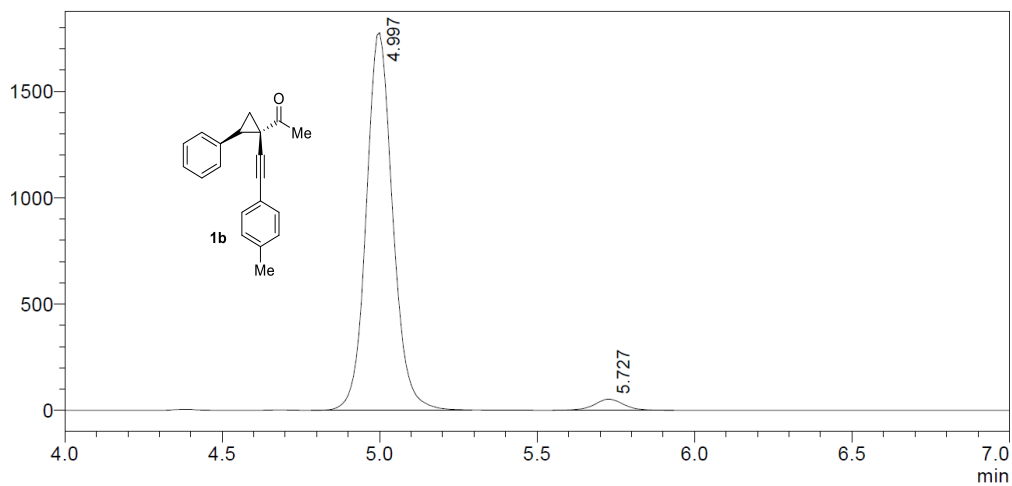

<Peak Table>

| Peak# | Ret. Time | Area     | Height  | Area%   |
|-------|-----------|----------|---------|---------|
| 1     | 4.997     | 10414267 | 1777322 | 96.796  |
| 2     | 5.727     | 344759   | 52543   | 3.204   |
|       |           | 10759026 | 1829865 | 100.000 |
